# Supplementary material for: Population-level risks of alcohol consumption by amount, geography, age, sex, and year: a systematic analysis for the Global Burden of Disease Study 2020
Source: PubMed Central journal article supplement (PMC9289789; doi:10.1016/s0140-6736(22)00847-9), 2022-07-16
Supplement: mmc2.pdf [file mmc2.pdf]

# THE LANCET

## Supplementary appendix 2

This appendix formed part of the original submission and has been peer reviewed. We post it as supplied by the authors.

**This online publication has been corrected. The corrected version first appeared at [thelancet.com](https://www.thelancet.com) on July 19, 2022**

Supplement to: GBD 2020 Alcohol Collaborators. Population-level risks of alcohol consumption by amount, geography, age, sex, and year: a systematic analysis for the Global Burden of Disease Study 2020. *Lancet* 2022; **400**: 185–235.

## **Supplementary Results**

### **Risks of alcohol consumption by geography, age, sex, and year: a systematic analysis from the Global Burden of Disease Study 2020**

GBD 2020 Alcohol Use Collaborators

## Tables and Figures

**Table S1:** Theoretical minimum risk exposure level (TMREL) and non-drinker equivalence (NDE) in standard drinks per day, by region, age, and sex, for 1990, 2000, 2010, and 2020

**Figure S1:** Percent of the population consuming harmful amounts of alcohol in excess of the non-drinker equivalence (NDE), 2020

**Figure S2:** Theoretical minimum risk exposure level (TMREL) and non-drinker equivalence (NDE) in units of standard drinks, by region, age, and sex, 2020, for sensitivity scenario A

**Figure S3:** Theoretical minimum risk exposure level (TMREL) and non-drinker equivalence (NDE) in units of standard drinks, by region, age, and sex, 2020, for sensitivity scenario B

**Figure S4:** Theoretical minimum risk exposure level (TMREL) and non-drinker equivalence (NDE) in units of standard drinks, by region, age, and sex, 2020, for sensitivity scenario C

**Figure S5:** Theoretical minimum risk exposure level (TMREL) and non-drinker equivalence (NDE) in units of standard drinks, by region, age, and sex, 2020, for risk-deletion sensitivity scenario

**Table S2:** Theoretical minimum risk exposure level (TMREL) computed using GBD 2017 and GBD 2020 risk curves in standard drinks per day, by region, age, and sex, for 2020

**Table S3:** Demographic makeup of the population consuming harmful amounts of alcohol in excess of the non-drinker equivalence (NDE) by location, 2020

Supplementary Table 1

| Region       | Age Group | Year | Female        |              | Male         |              |
|--------------|-----------|------|---------------|--------------|--------------|--------------|
|              |           |      | TMREL         | NDE          | TMREL        | NDE          |
| Central Asia | 15 to 19  | 1990 | 0.0735        | 0.126        | 0.00280      | 0.00480      |
|              |           |      | (0-0.300)     | (0-0.600)    | (0-0)        | (0-0)        |
| Central Asia | 20 to 24  | 1990 | 0.202         | 0.373        | 0.00720      | 0.0123       |
|              |           |      | (0-0.400)     | (0-1.00)     | (0-0.100)    | (0-0.200)    |
| Central Asia | 25 to 29  | 1990 | 0.264         | 0.527        | 0.0337       | 0.0570       |
|              |           |      | (0-0.400)     | (0-1.10)     | (0-0.300)    | (0-0.500)    |
| Central Asia | 30 to 34  | 1990 | 0.314         | 0.688        | 0.181        | 0.351        |
|              |           |      | (0-0.500)     | (0-1.30)     | (0-0.400)    | (0-1.00)     |
| Central Asia | 35 to 39  | 1990 | 0.358         | 0.862        | 0.330        | 0.844        |
|              |           |      | (0.100-0.500) | (0.200-1.60) | (0-0.500)    | (0-2.20)     |
| Central Asia | 40 to 44  | 1990 | 0.407         | 1.13         | 0.448        | 1.54         |
|              |           |      | (0.298-0.600) | (0.498-2.00) | (0.200-1.00) | (0.400-3.60) |
| Central Asia | 45 to 49  | 1990 | 0.461         | 1.48         | 0.527        | 1.98         |
|              |           |      | (0.300-0.600) | (0.700-2.30) | (0.300-1.00) | (0.700-4.10) |
| Central Asia | 50 to 54  | 1990 | 0.507         | 1.86         | 0.605        | 2.51         |
|              |           |      | (0.400-0.700) | (1.00-3.00)  | (0.400-1.70) | (0.900-4.80) |
| Central Asia | 55 to 59  | 1990 | 0.569         | 2.37         | 0.656        | 2.91         |
|              |           |      | (0.400-1.00)  | (1.20-4.00)  | (0.400-1.80) | (1.10-5.10)  |
| Central Asia | 60 to 64  | 1990 | 0.656         | 3.31         | 0.716        | 3.56         |
|              |           |      | (0.500-1.50)  | (1.50-5.30)  | (0.500-1.90) | (1.40-5.70)  |
| Central Asia | 65 to 69  | 1990 | 0.737         | 4.04         | 0.810        | 4.20         |
|              |           |      | (0.500-1.90)  | (1.70-6.10)  | (0.500-2.00) | (1.60-6.20)  |
| Central Asia | 70 to 74  | 1990 | 0.888         | 5.00         | 0.967        | 5.00         |
|              |           |      | (0.500-2.00)  | (2.00-6.80)  | (0.500-2.20) | (1.80-6.80)  |
| Central Asia | 75 to 79  | 1990 | 1.11          | 5.73         | 1.20         | 5.73         |
|              |           |      | (0.500-2.60)  | (2.20-7.30)  | (0.500-2.70) | (2.10-7.30)  |
| Central Asia | 80 plus   | 1990 | 1.54          | 6.59         | 1.68         | 6.64         |
|              |           |      | (0.500-3.00)  | (2.70-7.90)  | (0.500-3.00) | (2.50-7.90)  |
| Central Asia | 15 to 19  | 2000 | 0.0728        | 0.123        | 0.00840      | 0.0128       |
|              |           |      | (0-0.300)     | (0-0.700)    | (0-0.100)    | (0-0.200)    |
| Central Asia | 20 to 24  | 2000 | 0.172         | 0.316        | 0.0301       | 0.0495       |
|              |           |      | (0-0.400)     | (0-1.10)     | (0-0.200)    | (0-0.400)    |
| Central Asia | 25 to 29  | 2000 | 0.284         | 0.571        | 0.113        | 0.199        |
|              |           |      | (0-0.600)     | (0-1.40)     | (0-0.400)    | (0-1.00)     |
| Central Asia | 30 to 34  | 2000 | 0.341         | 0.761        | 0.283        | 0.598        |
|              |           |      | (0-0.600)     | (0-2.00)     | (0-1.00)     | (0-2.40)     |
| Central Asia | 35 to 39  | 2000 | 0.380         | 0.917        | 0.392        | 0.987        |
|              |           |      | (0.100-0.600) | (0.200-2.00) | (0-1.00)     | (0-3.00)     |
| Central Asia | 40 to 44  | 2000 | 0.429         | 1.16         | 0.501        | 1.48         |
|              |           |      | (0.300-0.700) | (0.500-2.10) | (0.200-1.90) | (0.400-3.60) |
| Central Asia | 45 to 49  | 2000 | 0.490         | 1.57         | 0.587        | 2.00         |
|              |           |      | (0.400-0.700) | (0.800-2.50) | (0.300-2.00) | (0.700-4.50) |
| Central Asia | 50 to 54  | 2000 | 0.542         | 2.00         | 0.651        | 2.56         |
|              |           |      | (0.400-1.00)  | (1.00-3.20)  | (0.400-1.90) | (0.998-5.10) |
| Central Asia | 55 to 59  | 2000 | 0.611         | 2.49         | 0.706        | 3.01         |
|              |           |      | (0.400-1.00)  | (1.30-4.20)  | (0.400-1.90) | (1.10-5.40)  |
| Central Asia | 60 to 64  | 2000 | 0.705         | 3.52         | 0.795        | 3.85         |
|              |           |      | (0.500-1.60)  | (1.70-5.50)  | (0.500-2.00) | (1.50-6.00)  |
| Central Asia | 65 to 69  | 2000 | 0.830         | 4.37         | 0.926        | 4.59         |
|              |           |      | (0.500-2.00)  | (1.90-6.30)  | (0.500-2.00) | (1.70-6.60)  |
| Central Asia | 70 to 74  | 2000 | 0.998         | 5.32         | 1.13         | 5.45         |
|              |           |      | (0.500-2.20)  | (2.20-7.00)  | (0.500-2.50) | (2.00-7.10)  |
| Central Asia | 75 to 79  | 2000 | 1.20          | 5.94         | 1.35         | 6.01         |
|              |           |      | (0.500-2.70)  | (2.30-7.40)  | (0.500-2.90) | (2.30-7.50)  |
| Central Asia | 80 plus   | 2000 | 1.61          | 6.72         | 1.81         | 6.83         |
|              |           |      | (0.500-3.00)  | (2.80-8.00)  | (0.500-3.20) | (2.70-8.00)  |
| Central Asia | 15 to 19  | 2010 | 0.0777        | 0.138        | 0.0104       | 0.0168       |
|              |           |      | (0-0.400)     | (0-0.802)    | (0-0.200)    | (0-0.300)    |
| Central Asia | 20 to 24  | 2010 | 0.170         | 0.320        | 0.0250       | 0.0420       |
|              |           |      | (0-0.400)     | (0-1.00)     | (0-0.300)    | (0-0.500)    |
| Central Asia | 25 to 29  | 2010 | 0.270         | 0.546        | 0.0849       | 0.151        |
|              |           |      | (0-0.600)     | (0-1.20)     | (0-0.400)    | (0-0.900)    |
| Central Asia | 30 to 34  | 2010 | 0.321         | 0.683        | 0.229        | 0.464        |
|              |           |      | (0-0.700)     | (0-1.30)     | (0-0.500)    | (0-1.20)     |
| Central Asia | 35 to 39  | 2010 | 0.378         | 0.852        | 0.346        | 0.798        |
|              |           |      | (0.100-0.700) | (0.100-1.60) | (0-1.00)     | (0-1.90)     |
| Central Asia | 40 to 44  | 2010 | 0.442         | 1.11         | 0.450        | 1.21         |
|              |           |      | (0.200-0.800) | (0.400-2.00) | (0.200-1.00) | (0.300-2.40) |
| Central Asia | 45 to 49  | 2010 | 0.508         | 1.50         | 0.554        | 1.76         |
|              |           |      | (0.398-1.00)  | (0.700-2.30) | (0.300-1.00) | (0.700-3.30) |
| Central Asia | 50 to 54  | 2010 | 0.568         | 1.90         | 0.650        | 2.40         |
|              |           |      | (0.400-1.00)  | (1.00-2.90)  | (0.400-1.00) | (1.00-4.40)  |
| Central Asia | 55 to 59  | 2010 | 0.641         | 2.40         | 0.724        | 3.01         |
|              |           |      | (0.497-1.00)  | (1.30-3.90)  | (0.400-1.80) | (1.20-5.20)  |
| Central Asia | 60 to 64  | 2010 | 0.712         | 3.29         | 0.789        | 3.75         |
|              |           |      | (0.500-1.00)  | (1.60-5.20)  | (0.500-2.00) | (1.50-5.80)  |

|                |          |      |               |              |              |              |
|----------------|----------|------|---------------|--------------|--------------|--------------|
|                |          |      | 0-807         | 4-11         | 0-879        | 4-34         |
| Central Asia   | 65 to 69 | 2010 | (0-500-2-00)  | (1-90-6-10)  | (0-500-2-00) | (1-80-6-30)  |
|                |          |      | 0-968         | 5-13         | 1-07         | 5-28         |
| Central Asia   | 70 to 74 | 2010 | (0-500-2-10)  | (2-10-6-90)  | (0-500-2-30) | (2-00-7-00)  |
|                |          |      | 1-19          | 5-82         | 1-34         | 5-96         |
| Central Asia   | 75 to 79 | 2010 | (0-500-2-70)  | (2-30-7-40)  | (0-500-2-90) | (2-20-7-50)  |
|                |          |      | 1-43          | 6-42         | 1-47         | 6-34         |
| Central Asia   | 80 plus  | 2010 | (0-500-3-00)  | (2-50-7-80)  | (0-500-3-00) | (2-40-7-70)  |
|                |          |      | 0-112         | 0-201        | 0-0212       | 0-0333       |
| Central Asia   | 15 to 19 | 2020 | (0-0-500)     | (0-1-00)     | (0-0-200)    | (0-0-400)    |
|                |          |      | 0-221         | 0-429        | 0-0416       | 0-0731       |
| Central Asia   | 20 to 24 | 2020 | (0-0-500)     | (0-1-10)     | (0-0-300)    | (0-0-600)    |
|                |          |      | 0-293         | 0-590        | 0-0921       | 0-165        |
| Central Asia   | 25 to 29 | 2020 | (0-0-600)     | (0-1-20)     | (0-0-400)    | (0-1-100)    |
|                |          |      | 0-344         | 0-721        | 0-224        | 0-451        |
| Central Asia   | 30 to 34 | 2020 | (0-0-700)     | (0-1-30)     | (0-0-502)    | (0-1-20)     |
|                |          |      | 0-402         | 0-884        | 0-351        | 0-773        |
| Central Asia   | 35 to 39 | 2020 | (0-0-900)     | (0-1-50)     | (0-1-100)    | (0-1-60)     |
|                |          |      | 0-471         | 1-15         | 0-466        | 1-18         |
| Central Asia   | 40 to 44 | 2020 | (0-298-1-00)  | (0-400-2-00) | (0-200-1-00) | (0-300-2-20) |
|                |          |      | 0-535         | 1-54         | 0-568        | 1-71         |
| Central Asia   | 45 to 49 | 2020 | (0-400-1-00)  | (0-800-2-40) | (0-300-1-00) | (0-698-3-10) |
|                |          |      | 0-595         | 1-94         | 0-672        | 2-32         |
| Central Asia   | 50 to 54 | 2020 | (0-400-1-00)  | (1-10-3-00)  | (0-400-1-00) | (1-00-4-10)  |
|                |          |      | 0-668         | 2-47         | 0-753        | 2-98         |
| Central Asia   | 55 to 59 | 2020 | (0-500-1-00)  | (1-30-3-90)  | (0-400-1-70) | (1-30-5-00)  |
|                |          |      | 0-751         | 3-40         | 0-823        | 3-72         |
| Central Asia   | 60 to 64 | 2020 | (0-500-1-00)  | (1-70-5-30)  | (0-500-2-00) | (1-50-5-70)  |
|                |          |      | 0-852         | 4-26         | 0-937        | 4-51         |
| Central Asia   | 65 to 69 | 2020 | (0-500-2-00)  | (2-00-6-20)  | (0-500-2-00) | (1-90-6-40)  |
|                |          |      | 0-921         | 5-01         | 1-02         | 5-10         |
| Central Asia   | 70 to 74 | 2020 | (0-500-2-00)  | (2-10-6-80)  | (0-500-2-20) | (2-00-6-90)  |
|                |          |      | 1-23          | 5-90         | 1-38         | 6-02         |
| Central Asia   | 75 to 79 | 2020 | (0-500-2-60)  | (2-30-7-40)  | (0-500-2-90) | (2-30-7-50)  |
|                |          |      | 1-37          | 6-32         | 1-43         | 6-28         |
| Central Asia   | 80 plus  | 2020 | (0-500-3-00)  | (2-50-7-70)  | (0-500-3-00) | (2-40-7-70)  |
|                |          |      | 0-00830       | 0-0132       | 0-00120      | 0-00210      |
| Central Europe | 15 to 19 | 1990 | (0-0-100)     | (0-0-200)    | (0-0)        | (0-0)        |
|                |          |      | 0-0407        | 0-0671       | 0-00460      | 0-00810      |
| Central Europe | 20 to 24 | 1990 | (0-0-300)     | (0-0-500)    | (0-0-00250)  | (0-0-00250)  |
|                |          |      | 0-134         | 0-239        | 0-0330       | 0-0590       |
| Central Europe | 25 to 29 | 1990 | (0-0-400)     | (0-0-800)    | (0-0-300)    | (0-0-600)    |
|                |          |      | 0-224         | 0-434        | 0-178        | 0-352        |
| Central Europe | 30 to 34 | 1990 | (0-0-400)     | (0-1-00)     | (0-0-400)    | (0-1-10)     |
|                |          |      | 0-294         | 0-620        | 0-324        | 0-798        |
| Central Europe | 35 to 39 | 1990 | (0-0-400)     | (0-1-20)     | (0-0-600)    | (0-1-70)     |
|                |          |      | 0-364         | 0-878        | 0-422        | 1-27         |
| Central Europe | 40 to 44 | 1990 | (0-100-0-600) | (0-200-1-40) | (0-200-1-00) | (0-300-2-60) |
|                |          |      | 0-423         | 1-16         | 0-488        | 1-66         |
| Central Europe | 45 to 49 | 1990 | (0-300-0-600) | (0-500-1-90) | (0-300-1-00) | (0-500-3-20) |
|                |          |      | 0-482         | 1-54         | 0-559        | 2-15         |
| Central Europe | 50 to 54 | 1990 | (0-300-0-800) | (0-800-2-40) | (0-300-1-00) | (0-798-4-00) |
|                |          |      | 0-558         | 2-11         | 0-636        | 2-71         |
| Central Europe | 55 to 59 | 1990 | (0-400-1-00)  | (1-10-3-50)  | (0-400-1-00) | (1-00-4-80)  |
|                |          |      | 0-619         | 3-00         | 0-685        | 3-39         |
| Central Europe | 60 to 64 | 1990 | (0-500-1-00)  | (1-40-4-80)  | (0-500-1-70) | (1-30-5-40)  |
|                |          |      | 0-666         | 3-82         | 0-743        | 4-05         |
| Central Europe | 65 to 69 | 1990 | (0-500-1-00)  | (1-80-5-70)  | (0-500-2-00) | (1-60-6-00)  |
|                |          |      | 0-701         | 4-53         | 0-770        | 4-69         |
| Central Europe | 70 to 74 | 1990 | (0-500-1-90)  | (2-00-6-30)  | (0-500-2-00) | (1-90-6-50)  |
|                |          |      | 0-757         | 5-04         | 0-852        | 5-25         |
| Central Europe | 75 to 79 | 1990 | (0-500-2-00)  | (2-20-6-80)  | (0-500-2-30) | (2-10-6-90)  |
|                |          |      | 0-911         | 5-71         | 1-06         | 5-96         |
| Central Europe | 80 plus  | 1990 | (0-500-3-00)  | (2-30-7-40)  | (0-500-3-00) | (2-40-7-50)  |
|                |          |      | 0-00730       | 0-0112       | 0-00170      | 0-00270      |
| Central Europe | 15 to 19 | 2000 | (0-0-100)     | (0-0-200)    | (0-0)        | (0-0)        |
|                |          |      | 0-0312        | 0-0511       | 0-00590      | 0-00980      |
| Central Europe | 20 to 24 | 2000 | (0-0-300)     | (0-0-500)    | (0-0)        | (0-0)        |
|                |          |      | 0-114         | 0-197        | 0-0225       | 0-0379       |
| Central Europe | 25 to 29 | 2000 | (0-0-300)     | (0-0-700)    | (0-0-300)    | (0-0-500)    |
|                |          |      | 0-211         | 0-399        | 0-126        | 0-231        |
| Central Europe | 30 to 34 | 2000 | (0-0-400)     | (0-1-00)     | (0-0-400)    | (0-1-100)    |
|                |          |      | 0-278         | 0-569        | 0-273        | 0-584        |
| Central Europe | 35 to 39 | 2000 | (0-0-402)     | (0-1-10)     | (0-0-500)    | (0-1-30)     |
|                |          |      | 0-350         | 0-799        | 0-376        | 0-935        |
| Central Europe | 40 to 44 | 2000 | (0-100-0-600) | (0-100-1-30) | (0-1-100)    | (0-1-90)     |
|                |          |      | 0-410         | 1-04         | 0-452        | 1-27         |
| Central Europe | 45 to 49 | 2000 | (0-200-0-700) | (0-400-1-70) | (0-200-1-00) | (0-400-2-30) |
|                |          |      | 0-472         | 1-35         | 0-515        | 1-69         |
| Central Europe | 50 to 54 | 2000 | (0-300-0-800) | (0-698-2-10) | (0-300-1-00) | (0-600-3-10) |
|                |          |      | 0-543         | 1-82         | 0-581        | 2-16         |
| Central Europe | 55 to 59 | 2000 | (0-400-1-00)  | (0-998-2-90) | (0-400-1-00) | (0-900-3-80) |

|                |          |      |                         |                        |                       |                      |
|----------------|----------|------|-------------------------|------------------------|-----------------------|----------------------|
| Central Europe | 60 to 64 | 2000 | 0-604<br>(0-500-1-00)   | 2-62<br>(1-30-4-20)    | 0-632<br>(0-400-1-00) | 2-85<br>(1-20-4-80)  |
| Central Europe | 65 to 69 | 2000 | 0-641<br>(0-500-1-00)   | 3-43<br>(1-70-5-30)    | 0-674<br>(0-500-1-50) | 3-57<br>(1-50-5-50)  |
| Central Europe | 70 to 74 | 2000 | 0-682<br>(0-500-1-50)   | 4-26<br>(1-90-6-10)    | 0-718<br>(0-500-2-00) | 4-34<br>(1-80-6-20)  |
| Central Europe | 75 to 79 | 2000 | 0-725<br>(0-500-2-00)   | 4-83<br>(2-10-6-60)    | 0-778<br>(0-500-2-00) | 4-94<br>(2-00-6-60)  |
| Central Europe | 80 plus  | 2000 | 0-920<br>(0-500-3-00)   | 5-69<br>(2-30-7-40)    | 1-01<br>(0-500-3-00)  | 5-81<br>(2-30-7-40)  |
| Central Europe | 15 to 19 | 2010 | 0-00620<br>(0-0-100)    | 0-00980<br>(0-0-200)   | 0-00160<br>(0-0)      | 0-00300<br>(0-0)     |
| Central Europe | 20 to 24 | 2010 | 0-0294<br>(0-0-300)     | 0-0480<br>(0-0-500)    | 0-00740<br>(0-0)      | 0-0106<br>(0-0)      |
| Central Europe | 25 to 29 | 2010 | 0-0972<br>(0-0-300)     | 0-167<br>(0-0-700)     | 0-0198<br>(0-0-300)   | 0-0340<br>(0-0-402)  |
| Central Europe | 30 to 34 | 2010 | 0-180<br>(0-0-400)      | 0-327<br>(0-0-900)     | 0-104<br>(0-0-400)    | 0-190<br>(0-1-00)    |
| Central Europe | 35 to 39 | 2010 | 0-256<br>(0-0-500)      | 0-500<br>(0-1-00)      | 0-254<br>(0-0-600)    | 0-524<br>(0-1-20)    |
| Central Europe | 40 to 44 | 2010 | 0-342<br>(0-0-600)      | 0-732<br>(0-1-20)      | 0-370<br>(0-0-802)    | 0-858<br>(0-1-60)    |
| Central Europe | 45 to 49 | 2010 | 0-412<br>(0-200-0-700)  | 0-946<br>(0-300-1-50)  | 0-450<br>(0-200-1-00) | 1-17<br>(0-300-2-10) |
| Central Europe | 50 to 54 | 2010 | 0-470<br>(0-300-0-802)  | 1-17<br>(0-500-1-90)   | 0-501<br>(0-300-1-00) | 1-46<br>(0-500-2-60) |
| Central Europe | 55 to 59 | 2010 | 0-543<br>(0-400-0-900)  | 1-53<br>(0-800-2-30)   | 0-563<br>(0-400-1-00) | 1-85<br>(0-800-3-20) |
| Central Europe | 60 to 64 | 2010 | 0-612<br>(0-497-1-00)   | 2-16<br>(1-10-3-40)    | 0-619<br>(0-400-1-00) | 2-41<br>(1-10-4-10)  |
| Central Europe | 65 to 69 | 2010 | 0-646<br>(0-500-1-00)   | 2-90<br>(1-40-4-60)    | 0-660<br>(0-500-1-00) | 3-03<br>(1-30-4-90)  |
| Central Europe | 70 to 74 | 2010 | 0-668<br>(0-500-1-00)   | 3-74<br>(1-80-5-60)    | 0-687<br>(0-500-1-50) | 3-81<br>(1-60-5-70)  |
| Central Europe | 75 to 79 | 2010 | 0-704<br>(0-500-1-70)   | 4-40<br>(1-90-6-20)    | 0-734<br>(0-500-2-00) | 4-51<br>(1-90-6-30)  |
| Central Europe | 80 plus  | 2010 | 0-874<br>(0-500-2-60)   | 5-44<br>(2-20-7-20)    | 0-925<br>(0-500-2-70) | 5-49<br>(2-10-7-10)  |
| Central Europe | 15 to 19 | 2020 | 0-00720<br>(0-0-100)    | 0-0116<br>(0-0-200)    | 0-00150<br>(0-0)      | 0-00270<br>(0-0)     |
| Central Europe | 20 to 24 | 2020 | 0-0411<br>(0-0-300)     | 0-0668<br>(0-0-500)    | 0-00830<br>(0-0)      | 0-0117<br>(0-0)      |
| Central Europe | 25 to 29 | 2020 | 0-118<br>(0-0-400)      | 0-208<br>(0-0-700)     | 0-0237<br>(0-0-300)   | 0-0396<br>(0-0-500)  |
| Central Europe | 30 to 34 | 2020 | 0-194<br>(0-0-400)      | 0-359<br>(0-0-902)     | 0-109<br>(0-0-400)    | 0-200<br>(0-1-00)    |
| Central Europe | 35 to 39 | 2020 | 0-267<br>(0-0-500)      | 0-517<br>(0-1-10)      | 0-260<br>(0-0-700)    | 0-526<br>(0-1-20)    |
| Central Europe | 40 to 44 | 2020 | 0-355<br>(0-0-700)      | 0-733<br>(0-1-20)      | 0-379<br>(0-0-900)    | 0-845<br>(0-1-60)    |
| Central Europe | 45 to 49 | 2020 | 0-433<br>(0-200-0-800)  | 0-952<br>(0-300-1-50)  | 0-462<br>(0-200-1-00) | 1-13<br>(0-300-2-00) |
| Central Europe | 50 to 54 | 2020 | 0-496<br>(0-300-0-900)  | 1-18<br>(0-600-1-90)   | 0-510<br>(0-300-1-00) | 1-39<br>(0-500-2-30) |
| Central Europe | 55 to 59 | 2020 | 0-567<br>(0-400-0-900)  | 1-53<br>(0-800-2-30)   | 0-576<br>(0-400-1-00) | 1-77<br>(0-800-3-00) |
| Central Europe | 60 to 64 | 2020 | 0-624<br>(0-500-1-00)   | 2-06<br>(1-10-3-10)    | 0-626<br>(0-400-1-00) | 2-26<br>(1-00-3-80)  |
| Central Europe | 65 to 69 | 2020 | 0-661<br>(0-500-1-00)   | 2-77<br>(1-40-4-30)    | 0-665<br>(0-500-1-00) | 2-88<br>(1-30-4-70)  |
| Central Europe | 70 to 74 | 2020 | 0-677<br>(0-500-1-00)   | 3-57<br>(1-70-5-30)    | 0-694<br>(0-500-1-21) | 3-65<br>(1-60-5-50)  |
| Central Europe | 75 to 79 | 2020 | 0-704<br>(0-500-1-50)   | 4-24<br>(1-90-6-10)    | 0-728<br>(0-500-1-90) | 4-34<br>(1-80-6-10)  |
| Central Europe | 80 plus  | 2020 | 0-868<br>(0-500-2-40)   | 5-35<br>(2-10-7-10)    | 0-918<br>(0-500-2-50) | 5-41<br>(2-10-7-10)  |
| Eastern Europe | 15 to 19 | 1990 | 0-00530<br>(0-0-100)    | 0-00900<br>(0-0-100)   | 0-000600<br>(0-0)     | 0-00110<br>(0-0)     |
| Eastern Europe | 20 to 24 | 1990 | 0-0201<br>(0-0-202)     | 0-0332<br>(0-0-400)    | 0-00140<br>(0-0)      | 0-00290<br>(0-0)     |
| Eastern Europe | 25 to 29 | 1990 | 0-0427<br>(0-0-300)     | 0-0731<br>(0-0-600)    | 0-00790<br>(0-0-100)  | 0-0137<br>(0-0-200)  |
| Eastern Europe | 30 to 34 | 1990 | 0-102<br>(0-0-400)      | 0-177<br>(0-0-700)     | 0-0706<br>(0-0-400)   | 0-128<br>(0-0-900)   |
| Eastern Europe | 35 to 39 | 1990 | 0-216<br>(0-0-400)      | 0-413<br>(0-1-00)      | 0-235<br>(0-0-400)    | 0-504<br>(0-1-40)    |
| Eastern Europe | 40 to 44 | 1990 | 0-327<br>(0-0975-0-500) | 0-737<br>(0-0975-1-30) | 0-369<br>(0-0-600)    | 1-14<br>(0-2-80)     |
| Eastern Europe | 45 to 49 | 1990 | 0-403<br>(0-300-0-600)  | 1-12<br>(0-498-1-90)   | 0-457<br>(0-200-1-00) | 1-72<br>(0-400-4-10) |
| Eastern Europe | 50 to 54 | 1990 | 0-468<br>(0-400-0-600)  | 1-66<br>(0-800-2-70)   | 0-538<br>(0-300-1-00) | 2-42<br>(0-700-4-90) |

|                |          |      |                        |                       |                         |                       |
|----------------|----------|------|------------------------|-----------------------|-------------------------|-----------------------|
| Eastern Europe | 55 to 59 | 1990 | 0-538<br>(0-400-0-802) | 2-56<br>(1-10-4-40)   | 0-619<br>(0-400-1-90)   | 3-16<br>(0-900-5-50)  |
| Eastern Europe | 60 to 64 | 1990 | 0-634<br>(0-500-1-70)  | 3-89<br>(1-50-5-90)   | 0-733<br>(0-500-2-00)   | 4-17<br>(1-40-6-20)   |
| Eastern Europe | 65 to 69 | 1990 | 0-801<br>(0-500-2-20)  | 5-01<br>(2-00-6-80)   | 0-886<br>(0-500-2-30)   | 4-95<br>(1-70-6-80)   |
| Eastern Europe | 70 to 74 | 1990 | 1-00<br>(0-500-2-80)   | 5-81<br>(2-40-7-40)   | 1-08<br>(0-500-2-80)    | 5-66<br>(2-10-7-20)   |
| Eastern Europe | 75 to 79 | 1990 | 1-18<br>(0-500-3-10)   | 6-35<br>(2-90-8-00)   | 1-27<br>(0-500-3-00)    | 6-26<br>(2-50-7-80)   |
| Eastern Europe | 80 plus  | 1990 | 1-52<br>(0-500-3-40)   | 6-93<br>(3-50-8-50)   | 1-66<br>(0-500-3-30)    | 6-89<br>(3-30-8-30)   |
| Eastern Europe | 15 to 19 | 2000 | 0-00430<br>(0-0)       | 0-00740<br>(0-0)      | 0-00630<br>(0-0)        | 0-00840<br>(0-0)      |
| Eastern Europe | 20 to 24 | 2000 | 0-0124<br>(0-0-200)    | 0-0216<br>(0-0-400)   | 0-0100<br>(0-0-100)     | 0-0146<br>(0-0-100)   |
| Eastern Europe | 25 to 29 | 2000 | 0-0387<br>(0-0-300)    | 0-0646<br>(0-0-600)   | 0-0252<br>(0-0-300)     | 0-0402<br>(0-0-500)   |
| Eastern Europe | 30 to 34 | 2000 | 0-118<br>(0-0-400)     | 0-210<br>(0-0-800)    | 0-104<br>(0-0-400)      | 0-188<br>(0-1-00)     |
| Eastern Europe | 35 to 39 | 2000 | 0-233<br>(0-0-400)     | 0-459<br>(0-1-00)     | 0-258<br>(0-0-500)      | 0-562<br>(0-1-40)     |
| Eastern Europe | 40 to 44 | 2000 | 0-332<br>(0-0-500)     | 0-754<br>(0-1-30)     | 0-372<br>(0-0975-0-602) | 1-07<br>(0-0975-2-50) |
| Eastern Europe | 45 to 49 | 2000 | 0-408<br>(0-200-0-600) | 1-14<br>(0-400-2-00)  | 0-475<br>(0-200-1-00)   | 1-67<br>(0-400-4-20)  |
| Eastern Europe | 50 to 54 | 2000 | 0-471<br>(0-300-0-600) | 1-65<br>(0-800-2-70)  | 0-554<br>(0-300-1-70)   | 2-36<br>(0-700-5-00)  |
| Eastern Europe | 55 to 59 | 2000 | 0-550<br>(0-400-1-00)  | 2-51<br>(1-10-4-40)   | 0-643<br>(0-400-2-00)   | 3-15<br>(0-900-5-60)  |
| Eastern Europe | 60 to 64 | 2000 | 0-656<br>(0-500-1-80)  | 3-95<br>(1-50-6-00)   | 0-799<br>(0-500-2-10)   | 4-40<br>(1-40-6-40)   |
| Eastern Europe | 65 to 69 | 2000 | 0-835<br>(0-500-2-20)  | 5-11<br>(2-00-6-80)   | 0-971<br>(0-500-2-40)   | 5-20<br>(1-80-7-00)   |
| Eastern Europe | 70 to 74 | 2000 | 1-06<br>(0-500-2-90)   | 5-94<br>(2-40-7-50)   | 1-19<br>(0-500-3-00)    | 5-93<br>(2-20-7-50)   |
| Eastern Europe | 75 to 79 | 2000 | 1-27<br>(0-500-3-10)   | 6-46<br>(2-90-8-00)   | 1-45<br>(0-500-3-10)    | 6-48<br>(2-70-7-90)   |
| Eastern Europe | 80 plus  | 2000 | 1-58<br>(0-500-3-50)   | 7-00<br>(3-60-8-50)   | 1-73<br>(0-500-3-40)    | 6-97<br>(3-40-8-30)   |
| Eastern Europe | 15 to 19 | 2010 | 0-00820<br>(0-0-102)   | 0-0141<br>(0-0-200)   | 0-00970<br>(0-0)        | 0-0113<br>(0-0)       |
| Eastern Europe | 20 to 24 | 2010 | 0-0207<br>(0-0-300)    | 0-0358<br>(0-0-400)   | 0-0116<br>(0-0-100)     | 0-0162<br>(0-0-102)   |
| Eastern Europe | 25 to 29 | 2010 | 0-0614<br>(0-0-300)    | 0-105<br>(0-0-700)    | 0-0305<br>(0-0-300)     | 0-0488<br>(0-0-600)   |
| Eastern Europe | 30 to 34 | 2010 | 0-137<br>(0-0-400)     | 0-249<br>(0-1-00)     | 0-123<br>(0-0-400)      | 0-225<br>(0-1-00)     |
| Eastern Europe | 35 to 39 | 2010 | 0-233<br>(0-0-600)     | 0-455<br>(0-1-10)     | 0-253<br>(0-0-600)      | 0-523<br>(0-1-30)     |
| Eastern Europe | 40 to 44 | 2010 | 0-332<br>(0-0-602)     | 0-714<br>(0-1-30)     | 0-366<br>(0-1-00)       | 0-910<br>(0-1-80)     |
| Eastern Europe | 45 to 49 | 2010 | 0-405<br>(0-200-0-700) | 0-983<br>(0-300-1-70) | 0-455<br>(0-200-1-00)   | 1-42<br>(0-400-3-10)  |
| Eastern Europe | 50 to 54 | 2010 | 0-469<br>(0-300-1-00)  | 1-37<br>(0-600-2-20)  | 0-551<br>(0-300-1-00)   | 2-10<br>(0-700-4-20)  |
| Eastern Europe | 55 to 59 | 2010 | 0-559<br>(0-400-1-00)  | 2-05<br>(0-900-3-50)  | 0-658<br>(0-400-1-80)   | 2-98<br>(0-900-5-30)  |
| Eastern Europe | 60 to 64 | 2010 | 0-670<br>(0-500-1-40)  | 3-44<br>(1-30-5-40)   | 0-820<br>(0-400-2-00)   | 4-15<br>(1-30-6-20)   |
| Eastern Europe | 65 to 69 | 2010 | 0-899<br>(0-500-2-20)  | 4-96<br>(1-80-6-70)   | 1-07<br>(0-500-2-50)    | 5-14<br>(1-60-6-90)   |
| Eastern Europe | 70 to 74 | 2010 | 1-18<br>(0-500-2-90)   | 5-94<br>(2-30-7-50)   | 1-29<br>(0-500-2-90)    | 5-90<br>(2-10-7-40)   |
| Eastern Europe | 75 to 79 | 2010 | 1-44<br>(0-500-3-10)   | 6-50<br>(2-80-7-90)   | 1-57<br>(0-500-3-00)    | 6-49<br>(2-60-7-90)   |
| Eastern Europe | 80 plus  | 2010 | 1-77<br>(0-500-3-40)   | 7-04<br>(3-60-8-40)   | 1-92<br>(0-500-3-30)    | 7-00<br>(3-30-8-20)   |
| Eastern Europe | 15 to 19 | 2020 | 0-0134<br>(0-0-200)    | 0-0228<br>(0-0-400)   | 0-0100<br>(0-0)         | 0-0119<br>(0-0)       |
| Eastern Europe | 20 to 24 | 2020 | 0-0315<br>(0-0-300)    | 0-0539<br>(0-0-500)   | 0-0136<br>(0-0-100)     | 0-0201<br>(0-0-200)   |
| Eastern Europe | 25 to 29 | 2020 | 0-0800<br>(0-0-400)    | 0-139<br>(0-0-800)    | 0-0315<br>(0-0-300)     | 0-0506<br>(0-0-700)   |
| Eastern Europe | 30 to 34 | 2020 | 0-156<br>(0-0-500)     | 0-286<br>(0-1-00)     | 0-111<br>(0-0-400)      | 0-204<br>(0-1-00)     |
| Eastern Europe | 35 to 39 | 2020 | 0-255<br>(0-0-600)     | 0-494<br>(0-1-10)     | 0-243<br>(0-0-700)      | 0-494<br>(0-1-20)     |
| Eastern Europe | 40 to 44 | 2020 | 0-342<br>(0-0-700)     | 0-720<br>(0-1-30)     | 0-362<br>(0-1-00)       | 0-845<br>(0-1-60)     |
| Eastern Europe | 45 to 49 | 2020 | 0-418<br>(0-200-0-800) | 0-982<br>(0-300-1-70) | 0-448<br>(0-200-1-00)   | 1-25<br>(0-300-2-30)  |

|                |          |      |                        |                       |                       |                      |
|----------------|----------|------|------------------------|-----------------------|-----------------------|----------------------|
| Eastern Europe | 50 to 54 | 2020 | 0-483<br>(0-300-1-00)  | 1-35<br>(0-600-2-20)  | 0-534<br>(0-300-1-00) | 1-89<br>(0-600-3-60) |
| Eastern Europe | 55 to 59 | 2020 | 0-572<br>(0-400-1-00)  | 1-97<br>(0-900-3-30)  | 0-624<br>(0-400-1-00) | 2-72<br>(0-900-4-80) |
| Eastern Europe | 60 to 64 | 2020 | 0-670<br>(0-500-1-00)  | 3-25<br>(1-30-5-20)   | 0-779<br>(0-400-2-00) | 3-90<br>(1-20-5-90)  |
| Eastern Europe | 65 to 69 | 2020 | 0-817<br>(0-500-2-00)  | 4-62<br>(1-90-6-40)   | 0-961<br>(0-500-2-30) | 4-83<br>(1-50-6-60)  |
| Eastern Europe | 70 to 74 | 2020 | 1-08<br>(0-500-2-50)   | 5-69<br>(2-30-7-30)   | 1-21<br>(0-500-2-70)  | 5-67<br>(2-00-7-20)  |
| Eastern Europe | 75 to 79 | 2020 | 1-37<br>(0-500-3-00)   | 6-39<br>(2-90-7-80)   | 1-52<br>(0-500-3-00)  | 6-37<br>(2-50-7-70)  |
| Eastern Europe | 80 plus  | 2020 | 1-69<br>(0-600-3-30)   | 6-94<br>(3-40-8-30)   | 1-87<br>(0-500-3-30)  | 6-92<br>(3-30-8-20)  |
| Australasia    | 15 to 19 | 1990 | 0-000300<br>(0-0)      | 0-000400<br>(0-0)     | 0-00260<br>(0-0)      | 0-00320<br>(0-0)     |
| Australasia    | 20 to 24 | 1990 | 0-00120<br>(0-0)       | 0-00190<br>(0-0)      | 0-00770<br>(0-0)      | 0-00970<br>(0-0)     |
| Australasia    | 25 to 29 | 1990 | 0-00330<br>(0-0)       | 0-00590<br>(0-0)      | 0-00830<br>(0-0)      | 0-0123<br>(0-0)      |
| Australasia    | 30 to 34 | 1990 | 0-0154<br>(0-0-200)    | 0-0248<br>(0-0-400)   | 0-0328<br>(0-0-300)   | 0-0587<br>(0-0-602)  |
| Australasia    | 35 to 39 | 1990 | 0-0368<br>(0-0-300)    | 0-0615<br>(0-0-500)   | 0-182<br>(0-0-400)    | 0-372<br>(0-1-30)    |
| Australasia    | 40 to 44 | 1990 | 0-135<br>(0-0-400)     | 0-237<br>(0-0-800)    | 0-355<br>(0-0-802)    | 1-00<br>(0-2-50)     |
| Australasia    | 45 to 49 | 1990 | 0-244<br>(0-0-402)     | 0-482<br>(0-1-10)     | 0-511<br>(0-200-1-00) | 1-91<br>(0-200-4-10) |
| Australasia    | 50 to 54 | 1990 | 0-362<br>(0-0-900)     | 0-873<br>(0-1-80)     | 0-701<br>(0-300-2-00) | 2-83<br>(0-600-5-20) |
| Australasia    | 55 to 59 | 1990 | 0-483<br>(0-200-1-00)  | 1-57<br>(0-400-3-20)  | 0-897<br>(0-400-2-00) | 3-62<br>(0-900-5-80) |
| Australasia    | 60 to 64 | 1990 | 0-610<br>(0-300-1-00)  | 2-70<br>(0-800-5-00)  | 1-11<br>(0-400-2-30)  | 4-36<br>(1-10-6-30)  |
| Australasia    | 65 to 69 | 1990 | 0-800<br>(0-400-2-00)  | 3-93<br>(1-10-6-00)   | 1-36<br>(0-500-2-60)  | 5-11<br>(1-40-6-80)  |
| Australasia    | 70 to 74 | 1990 | 1-06<br>(0-500-2-40)   | 4-98<br>(1-50-6-80)   | 1-52<br>(0-500-2-80)  | 5-71<br>(1-90-7-20)  |
| Australasia    | 75 to 79 | 1990 | 1-16<br>(0-500-2-60)   | 5-51<br>(2-00-7-10)   | 1-59<br>(0-500-2-90)  | 6-11<br>(2-30-7-50)  |
| Australasia    | 80 plus  | 1990 | 1-19<br>(0-500-2-90)   | 5-85<br>(2-10-7-40)   | 1-57<br>(0-500-3-00)  | 6-29<br>(2-60-7-70)  |
| Australasia    | 15 to 19 | 2000 | 0-000300<br>(0-0)      | 0-000400<br>(0-0)     | 0-00350<br>(0-0)      | 0-00380<br>(0-0)     |
| Australasia    | 20 to 24 | 2000 | 0-00110<br>(0-0)       | 0-00190<br>(0-0)      | 0-00990<br>(0-0)      | 0-0126<br>(0-0)      |
| Australasia    | 25 to 29 | 2000 | 0-00500<br>(0-0)       | 0-00910<br>(0-0)      | 0-0171<br>(0-0-200)   | 0-0237<br>(0-0-302)  |
| Australasia    | 30 to 34 | 2000 | 0-0210<br>(0-0-300)    | 0-0358<br>(0-0-402)   | 0-0513<br>(0-0-400)   | 0-0865<br>(0-1-00)   |
| Australasia    | 35 to 39 | 2000 | 0-0453<br>(0-0-300)    | 0-0753<br>(0-0-600)   | 0-161<br>(0-0-500)    | 0-316<br>(0-1-20)    |
| Australasia    | 40 to 44 | 2000 | 0-109<br>(0-0-400)     | 0-188<br>(0-0-702)    | 0-314<br>(0-0-800)    | 0-766<br>(0-2-00)    |
| Australasia    | 45 to 49 | 2000 | 0-198<br>(0-0-400)     | 0-363<br>(0-1-00)     | 0-432<br>(0-1-00)     | 1-29<br>(0-3-00)     |
| Australasia    | 50 to 54 | 2000 | 0-286<br>(0-0-500)     | 0-569<br>(0-1-20)     | 0-552<br>(0-200-1-00) | 1-95<br>(0-400-4-00) |
| Australasia    | 55 to 59 | 2000 | 0-405<br>(0-100-0-900) | 0-969<br>(0-100-1-90) | 0-667<br>(0-300-1-00) | 2-62<br>(0-700-4-80) |
| Australasia    | 60 to 64 | 2000 | 0-532<br>(0-300-1-00)  | 1-60<br>(0-600-3-10)  | 0-763<br>(0-400-1-90) | 3-23<br>(0-998-5-30) |
| Australasia    | 65 to 69 | 2000 | 0-635<br>(0-400-1-00)  | 2-59<br>(0-900-4-50)  | 0-900<br>(0-500-2-00) | 3-96<br>(1-20-6-00)  |
| Australasia    | 70 to 74 | 2000 | 0-708<br>(0-500-1-00)  | 3-69<br>(1-20-5-70)   | 1-04<br>(0-500-2-30)  | 4-68<br>(1-50-6-40)  |
| Australasia    | 75 to 79 | 2000 | 0-799<br>(0-500-2-10)  | 4-50<br>(1-70-6-40)   | 1-21<br>(0-500-2-50)  | 5-31<br>(2-00-7-00)  |
| Australasia    | 80 plus  | 2000 | 1-03<br>(0-500-2-70)   | 5-44<br>(1-90-7-10)   | 1-34<br>(0-600-2-90)  | 5-89<br>(2-30-7-40)  |
| Australasia    | 15 to 19 | 2010 | 0-000300<br>(0-0)      | 0-000500<br>(0-0)     | 0-00350<br>(0-0)      | 0-00440<br>(0-0)     |
| Australasia    | 20 to 24 | 2010 | 0-00200<br>(0-0)       | 0-00350<br>(0-0)      | 0-00690<br>(0-0)      | 0-00790<br>(0-0)     |
| Australasia    | 25 to 29 | 2010 | 0-00390<br>(0-0)       | 0-00650<br>(0-0)      | 0-0105<br>(0-0)       | 0-0148<br>(0-0)      |
| Australasia    | 30 to 34 | 2010 | 0-0145<br>(0-0-200)    | 0-0236<br>(0-0-400)   | 0-0430<br>(0-0-400)   | 0-0727<br>(0-0-900)  |
| Australasia    | 35 to 39 | 2010 | 0-0408<br>(0-0-300)    | 0-0686<br>(0-0-500)   | 0-143<br>(0-0-500)    | 0-274<br>(0-1-20)    |
| Australasia    | 40 to 44 | 2010 | 0-0937<br>(0-0-400)    | 0-159<br>(0-0-700)    | 0-283<br>(0-0-700)    | 0-631<br>(0-1-70)    |



|                          |          |      |                        |                       |                        |                       |
|--------------------------|----------|------|------------------------|-----------------------|------------------------|-----------------------|
| Australasia              | 45 to 49 | 2010 | 0-188<br>(0-0-500)     | 0-340<br>(0-1-00)     | 0-393<br>(0-0-802)     | 0-999<br>(0-2-20)     |
| Australasia              | 50 to 54 | 2010 | 0-257<br>(0-0-600)     | 0-478<br>(0-1-10)     | 0-477<br>(0-198-1-00)  | 1-34<br>(0-298-2-70)  |
| Australasia              | 55 to 59 | 2010 | 0-354<br>(0-0-700)     | 0-730<br>(0-1-30)     | 0-540<br>(0-300-1-00)  | 1-69<br>(0-500-3-30)  |
| Australasia              | 60 to 64 | 2010 | 0-461<br>(0-200-0-800) | 1-06<br>(0-300-1-90)  | 0-615<br>(0-400-1-00)  | 2-22<br>(0-798-4-00)  |
| Australasia              | 65 to 69 | 2010 | 0-545<br>(0-300-0-900) | 1-54<br>(0-700-2-80)  | 0-688<br>(0-400-1-00)  | 2-81<br>(1-00-4-80)   |
| Australasia              | 70 to 74 | 2010 | 0-601<br>(0-400-0-900) | 2-28<br>(1-00-3-90)   | 0-733<br>(0-500-1-10)  | 3-44<br>(1-20-5-40)   |
| Australasia              | 75 to 79 | 2010 | 0-637<br>(0-500-1-00)  | 3-14<br>(1-20-5-10)   | 0-794<br>(0-500-2-00)  | 4-14<br>(1-50-6-00)   |
| Australasia              | 80 plus  | 2010 | 0-743<br>(0-500-2-20)  | 4-52<br>(1-60-6-40)   | 1-01<br>(0-597-2-40)   | 5-16<br>(1-90-6-80)   |
| Australasia              | 15 to 19 | 2020 | 0-00290<br>(0-0)       | 0-00370<br>(0-0)      | 0-00600<br>(0-0)       | 0-00710<br>(0-0)      |
| Australasia              | 20 to 24 | 2020 | 0-00490<br>(0-0)       | 0-00740<br>(0-0)      | 0-0143<br>(0-0)        | 0-0185<br>(0-0)       |
| Australasia              | 25 to 29 | 2020 | 0-00660<br>(0-0)       | 0-0108<br>(0-0)       | 0-0203<br>(0-0-202)    | 0-0259<br>(0-0-400)   |
| Australasia              | 30 to 34 | 2020 | 0-0188<br>(0-0-300)    | 0-0315<br>(0-0-400)   | 0-0492<br>(0-0-400)    | 0-0848<br>(0-1-00)    |
| Australasia              | 35 to 39 | 2020 | 0-0509<br>(0-0-400)    | 0-0835<br>(0-0-602)   | 0-148<br>(0-0-600)     | 0-284<br>(0-1-20)     |
| Australasia              | 40 to 44 | 2020 | 0-114<br>(0-0-402)     | 0-193<br>(0-0-900)    | 0-294<br>(0-0-800)     | 0-637<br>(0-1-60)     |
| Australasia              | 45 to 49 | 2020 | 0-196<br>(0-0-500)     | 0-352<br>(0-1-00)     | 0-414<br>(0-0-900)     | 1-02<br>(0-2-20)      |
| Australasia              | 50 to 54 | 2020 | 0-279<br>(0-0-700)     | 0-520<br>(0-1-10)     | 0-499<br>(0-200-0-900) | 1-37<br>(0-300-2-80)  |
| Australasia              | 55 to 59 | 2020 | 0-381<br>(0-0-800)     | 0-763<br>(0-1-30)     | 0-550<br>(0-300-1-00)  | 1-59<br>(0-500-3-00)  |
| Australasia              | 60 to 64 | 2020 | 0-470<br>(0-200-0-800) | 1-04<br>(0-300-1-80)  | 0-610<br>(0-400-1-00)  | 2-02<br>(0-798-3-60)  |
| Australasia              | 65 to 69 | 2020 | 0-534<br>(0-300-0-800) | 1-39<br>(0-700-2-40)  | 0-671<br>(0-400-1-00)  | 2-56<br>(1-00-4-40)   |
| Australasia              | 70 to 74 | 2020 | 0-579<br>(0-400-0-800) | 1-92<br>(0-900-3-40)  | 0-702<br>(0-500-1-00)  | 3-18<br>(1-20-5-10)   |
| Australasia              | 75 to 79 | 2020 | 0-609<br>(0-500-0-900) | 2-65<br>(1-10-4-40)   | 0-743<br>(0-500-1-80)  | 3-83<br>(1-50-5-70)   |
| Australasia              | 80 plus  | 2020 | 0-674<br>(0-500-1-50)  | 4-08<br>(1-40-6-10)   | 0-902<br>(0-500-2-30)  | 4-87<br>(1-70-6-60)   |
| High-income Asia Pacific | 15 to 19 | 1990 | 0-0393<br>(0-0-300)    | 0-0671<br>(0-0-500)   | 0-0113<br>(0-0-200)    | 0-0197<br>(0-0-300)   |
| High-income Asia Pacific | 20 to 24 | 1990 | 0-0551<br>(0-0-300)    | 0-0947<br>(0-0-700)   | 0-0109<br>(0-0-200)    | 0-0200<br>(0-0-300)   |
| High-income Asia Pacific | 25 to 29 | 1990 | 0-118<br>(0-0-400)     | 0-212<br>(0-0-900)    | 0-0422<br>(0-0-300)    | 0-0759<br>(0-0-700)   |
| High-income Asia Pacific | 30 to 34 | 1990 | 0-166<br>(0-0-400)     | 0-308<br>(0-0-900)    | 0-131<br>(0-0-400)     | 0-245<br>(0-1-00)     |
| High-income Asia Pacific | 35 to 39 | 1990 | 0-217<br>(0-0-400)     | 0-413<br>(0-1-00)     | 0-236<br>(0-0-500)     | 0-474<br>(0-1-20)     |
| High-income Asia Pacific | 40 to 44 | 1990 | 0-286<br>(0-0-400)     | 0-580<br>(0-1-10)     | 0-321<br>(0-0-600)     | 0-688<br>(0-1-30)     |
| High-income Asia Pacific | 45 to 49 | 1990 | 0-356<br>(0-100-0-500) | 0-802<br>(0-100-1-30) | 0-378<br>(0-0-700)     | 0-861<br>(0-1-50)     |
| High-income Asia Pacific | 50 to 54 | 1990 | 0-405<br>(0-200-0-600) | 0-997<br>(0-398-1-50) | 0-414<br>(0-200-0-700) | 0-987<br>(0-300-1-70) |
| High-income Asia Pacific | 55 to 59 | 1990 | 0-447<br>(0-300-0-600) | 1-19<br>(0-600-1-80)  | 0-442<br>(0-300-0-600) | 1-13<br>(0-500-1-90)  |
| High-income Asia Pacific | 60 to 64 | 1990 | 0-496<br>(0-400-0-600) | 1-53<br>(0-900-2-20)  | 0-477<br>(0-300-0-600) | 1-42<br>(0-798-2-20)  |
| High-income Asia Pacific | 65 to 69 | 1990 | 0-519<br>(0-400-0-600) | 1-87<br>(1-10-2-70)   | 0-500<br>(0-400-0-600) | 1-69<br>(0-998-2-60)  |
| High-income Asia Pacific | 70 to 74 | 1990 | 0-544<br>(0-500-0-700) | 2-30<br>(1-40-3-50)   | 0-521<br>(0-400-0-600) | 2-07<br>(1-10-3-40)   |
| High-income Asia Pacific | 75 to 79 | 1990 | 0-560<br>(0-500-0-802) | 2-79<br>(1-60-4-40)   | 0-550<br>(0-500-0-902) | 2-58<br>(1-30-4-30)   |
| High-income Asia Pacific | 80 plus  | 1990 | 0-607<br>(0-500-1-20)  | 3-57<br>(1-80-5-40)   | 0-591<br>(0-500-1-00)  | 3-29<br>(1-70-5-30)   |
| High-income Asia Pacific | 15 to 19 | 2000 | 0-0124<br>(0-0-200)    | 0-0213<br>(0-0-300)   | 0-00460<br>(0-0)       | 0-00840<br>(0-0)      |
| High-income Asia Pacific | 20 to 24 | 2000 | 0-0287<br>(0-0-300)    | 0-0485<br>(0-0-600)   | 0-0158<br>(0-0-200)    | 0-0249<br>(0-0-400)   |
| High-income Asia Pacific | 25 to 29 | 2000 | 0-0644<br>(0-0-400)    | 0-113<br>(0-1-00)     | 0-0386<br>(0-0-400)    | 0-0665<br>(0-0-900)   |
| High-income Asia Pacific | 30 to 34 | 2000 | 0-104<br>(0-0-400)     | 0-186<br>(0-1-00)     | 0-114<br>(0-0-400)     | 0-212<br>(0-1-10)     |
| High-income Asia Pacific | 35 to 39 | 2000 | 0-152<br>(0-0-400)     | 0-277<br>(0-0-900)    | 0-207<br>(0-0-500)     | 0-406<br>(0-1-10)     |

|                           |          |      |                        |                       |                        |                       |
|---------------------------|----------|------|------------------------|-----------------------|------------------------|-----------------------|
| High-income Asia Pacific  | 40 to 44 | 2000 | 0-231<br>(0-0-400)     | 0-442<br>(0-1-00)     | 0-294<br>(0-0-600)     | 0-609<br>(0-1-20)     |
| High-income Asia Pacific  | 45 to 49 | 2000 | 0-306<br>(0-0-500)     | 0-624<br>(0-1-10)     | 0-364<br>(0-0-600)     | 0-803<br>(0-1-40)     |
| High-income Asia Pacific  | 50 to 54 | 2000 | 0-361<br>(0-0-500)     | 0-785<br>(0-1-20)     | 0-405<br>(0-100-0-700) | 0-948<br>(0-200-1-60) |
| High-income Asia Pacific  | 55 to 59 | 2000 | 0-426<br>(0-200-0-600) | 1-01<br>(0-400-1-50)  | 0-430<br>(0-200-0-600) | 1-05<br>(0-400-1-80)  |
| High-income Asia Pacific  | 60 to 64 | 2000 | 0-489<br>(0-300-0-600) | 1-32<br>(0-700-2-00)  | 0-468<br>(0-300-0-600) | 1-25<br>(0-600-2-00)  |
| High-income Asia Pacific  | 65 to 69 | 2000 | 0-519<br>(0-400-0-600) | 1-61<br>(1-00-2-40)   | 0-488<br>(0-400-0-600) | 1-46<br>(0-800-2-30)  |
| High-income Asia Pacific  | 70 to 74 | 2000 | 0-536<br>(0-400-0-700) | 1-93<br>(1-20-2-80)   | 0-509<br>(0-400-0-600) | 1-76<br>(1-00-2-70)   |
| High-income Asia Pacific  | 75 to 79 | 2000 | 0-546<br>(0-500-0-700) | 2-27<br>(1-30-3-50)   | 0-523<br>(0-400-0-600) | 2-12<br>(1-20-3-30)   |
| High-income Asia Pacific  | 80 plus  | 2000 | 0-573<br>(0-500-1-00)  | 2-98<br>(1-60-4-80)   | 0-558<br>(0-500-1-00)  | 2-74<br>(1-40-4-50)   |
| High-income Asia Pacific  | 15 to 19 | 2010 | 0-0326<br>(0-0-300)    | 0-0510<br>(0-0-600)   | 0-0119<br>(0-0-100)    | 0-0170<br>(0-0-100)   |
| High-income Asia Pacific  | 20 to 24 | 2010 | 0-0789<br>(0-1-00)     | 0-126<br>(0-1-10)     | 0-0675<br>(0-1-00)     | 0-0956<br>(0-1-10)    |
| High-income Asia Pacific  | 25 to 29 | 2010 | 0-112<br>(0-1-00)      | 0-184<br>(0-1-20)     | 0-100<br>(0-1-00)      | 0-153<br>(0-1-20)     |
| High-income Asia Pacific  | 30 to 34 | 2010 | 0-124<br>(0-0-900)     | 0-214<br>(0-1-20)     | 0-165<br>(0-1-00)      | 0-299<br>(0-1-40)     |
| High-income Asia Pacific  | 35 to 39 | 2010 | 0-148<br>(0-0-600)     | 0-266<br>(0-1-10)     | 0-253<br>(0-1-00)      | 0-494<br>(0-1-40)     |
| High-income Asia Pacific  | 40 to 44 | 2010 | 0-200<br>(0-0-500)     | 0-373<br>(0-1-10)     | 0-335<br>(0-1-00)      | 0-702<br>(0-1-50)     |
| High-income Asia Pacific  | 45 to 49 | 2010 | 0-269<br>(0-0-500)     | 0-523<br>(0-1-10)     | 0-387<br>(0-0-900)     | 0-848<br>(0-1-50)     |
| High-income Asia Pacific  | 50 to 54 | 2010 | 0-335<br>(0-0-600)     | 0-680<br>(0-1-20)     | 0-424<br>(0-200-0-800) | 0-989<br>(0-298-1-70) |
| High-income Asia Pacific  | 55 to 59 | 2010 | 0-393<br>(0-100-0-600) | 0-840<br>(0-200-1-30) | 0-449<br>(0-300-0-700) | 1-13<br>(0-400-1-90)  |
| High-income Asia Pacific  | 60 to 64 | 2010 | 0-455<br>(0-300-0-602) | 1-08<br>(0-500-1-70)  | 0-474<br>(0-300-0-700) | 1-29<br>(0-600-2-10)  |
| High-income Asia Pacific  | 65 to 69 | 2010 | 0-505<br>(0-400-0-700) | 1-34<br>(0-800-2-10)  | 0-489<br>(0-400-0-600) | 1-43<br>(0-800-2-20)  |
| High-income Asia Pacific  | 70 to 74 | 2010 | 0-534<br>(0-400-0-700) | 1-63<br>(1-00-2-40)   | 0-510<br>(0-400-0-600) | 1-64<br>(0-900-2-50)  |
| High-income Asia Pacific  | 75 to 79 | 2010 | 0-543<br>(0-400-0-700) | 1-93<br>(1-10-3-00)   | 0-518<br>(0-400-0-600) | 1-94<br>(1-10-3-10)   |
| High-income Asia Pacific  | 80 plus  | 2010 | 0-564<br>(0-500-1-00)  | 2-68<br>(1-30-4-40)   | 0-548<br>(0-500-0-900) | 2-54<br>(1-30-4-20)   |
| High-income Asia Pacific  | 15 to 19 | 2020 | 0-0433<br>(0-0-400)    | 0-0719<br>(0-0-800)   | 0-0179<br>(0-0-200)    | 0-0256<br>(0-0-400)   |
| High-income Asia Pacific  | 20 to 24 | 2020 | 0-0888<br>(0-1-00)     | 0-147<br>(0-1-10)     | 0-0743<br>(0-1-00)     | 0-105<br>(0-1-20)     |
| High-income Asia Pacific  | 25 to 29 | 2020 | 0-123<br>(0-0-805)     | 0-212<br>(0-1-20)     | 0-115<br>(0-1-00)      | 0-180<br>(0-1-30)     |
| High-income Asia Pacific  | 30 to 34 | 2020 | 0-153<br>(0-0-700)     | 0-271<br>(0-1-20)     | 0-196<br>(0-1-00)      | 0-359<br>(0-1-40)     |
| High-income Asia Pacific  | 35 to 39 | 2020 | 0-194<br>(0-0-600)     | 0-352<br>(0-1-10)     | 0-291<br>(0-1-00)      | 0-574<br>(0-1-40)     |
| High-income Asia Pacific  | 40 to 44 | 2020 | 0-256<br>(0-0-600)     | 0-478<br>(0-1-10)     | 0-380<br>(0-0-900)     | 0-818<br>(0-1-60)     |
| High-income Asia Pacific  | 45 to 49 | 2020 | 0-322<br>(0-0-600)     | 0-627<br>(0-1-20)     | 0-436<br>(0-100-0-900) | 0-986<br>(0-198-1-70) |
| High-income Asia Pacific  | 50 to 54 | 2020 | 0-375<br>(0-0-700)     | 0-762<br>(0-1-20)     | 0-462<br>(0-200-0-800) | 1-10<br>(0-398-1-90)  |
| High-income Asia Pacific  | 55 to 59 | 2020 | 0-438<br>(0-200-0-700) | 0-942<br>(0-398-1-40) | 0-480<br>(0-300-0-700) | 1-19<br>(0-500-2-00)  |
| High-income Asia Pacific  | 60 to 64 | 2020 | 0-505<br>(0-300-0-700) | 1-20<br>(0-700-1-80)  | 0-500<br>(0-300-0-700) | 1-37<br>(0-700-2-10)  |
| High-income Asia Pacific  | 65 to 69 | 2020 | 0-531<br>(0-400-0-700) | 1-43<br>(0-898-2-10)  | 0-511<br>(0-400-0-602) | 1-54<br>(0-800-2-40)  |
| High-income Asia Pacific  | 70 to 74 | 2020 | 0-548<br>(0-400-0-700) | 1-68<br>(1-00-2-50)   | 0-522<br>(0-400-0-600) | 1-73<br>(1-00-2-70)   |
| High-income Asia Pacific  | 75 to 79 | 2020 | 0-557<br>(0-400-0-700) | 2-00<br>(1-20-3-00)   | 0-530<br>(0-400-0-700) | 1-98<br>(1-10-3-10)   |
| High-income Asia Pacific  | 80 plus  | 2020 | 0-572<br>(0-500-1-00)  | 2-69<br>(1-40-4-30)   | 0-554<br>(0-500-0-900) | 2-54<br>(1-30-4-10)   |
| High-income North America | 15 to 19 | 1990 | 0-00610<br>(0-0)       | 0-0106<br>(0-0)       | 0-00250<br>(0-0)       | 0-00400<br>(0-0)      |
| High-income North America | 20 to 24 | 1990 | 0-0116<br>(0-0-200)    | 0-0205<br>(0-0-302)   | 0-00430<br>(0-0)       | 0-00620<br>(0-0)      |
| High-income North America | 25 to 29 | 1990 | 0-0330<br>(0-0-300)    | 0-0584<br>(0-0-600)   | 0-00950<br>(0-0-102)   | 0-0172<br>(0-0-202)   |
| High-income North America | 30 to 34 | 1990 | 0-0845<br>(0-0-400)    | 0-148<br>(0-0-800)    | 0-0503<br>(0-0-400)    | 0-0928<br>(0-1-00)    |

|                           |          |      |                        |                       |                       |                      |
|---------------------------|----------|------|------------------------|-----------------------|-----------------------|----------------------|
| High-income North America | 35 to 39 | 1990 | 0-167<br>(0-0-400)     | 0-306<br>(0-1-00)     | 0-238<br>(0-0-600)    | 0-489<br>(0-1-30)    |
| High-income North America | 40 to 44 | 1990 | 0-277<br>(0-0-600)     | 0-549<br>(0-1-10)     | 0-428<br>(0-1-00)     | 1-15<br>(0-2-30)     |
| High-income North America | 45 to 49 | 1990 | 0-400<br>(0-0-900)     | 0-911<br>(0-1-60)     | 0-623<br>(0-300-1-00) | 2-05<br>(0-500-4-00) |
| High-income North America | 50 to 54 | 1990 | 0-521<br>(0-200-1-00)  | 1-41<br>(0-400-2-50)  | 0-823<br>(0-400-2-00) | 2-98<br>(0-800-5-20) |
| High-income North America | 55 to 59 | 1990 | 0-634<br>(0-300-1-00)  | 2-08<br>(0-800-3-70)  | 0-989<br>(0-400-2-00) | 3-70<br>(1-10-5-80)  |
| High-income North America | 60 to 64 | 1990 | 0-742<br>(0-400-1-00)  | 3-02<br>(1-10-5-00)   | 1-17<br>(0-500-2-30)  | 4-43<br>(1-30-6-30)  |
| High-income North America | 65 to 69 | 1990 | 0-830<br>(0-500-2-00)  | 3-79<br>(1-20-5-80)   | 1-35<br>(0-500-2-40)  | 5-01<br>(1-60-6-70)  |
| High-income North America | 70 to 74 | 1990 | 0-968<br>(0-500-2-20)  | 4-64<br>(1-60-6-40)   | 1-53<br>(0-500-2-70)  | 5-58<br>(1-90-7-10)  |
| High-income North America | 75 to 79 | 1990 | 1-15<br>(0-500-2-40)   | 5-29<br>(1-90-6-90)   | 1-66<br>(0-600-2-80)  | 5-99<br>(2-20-7-40)  |
| High-income North America | 80 plus  | 1990 | 1-50<br>(0-500-3-00)   | 6-18<br>(2-40-7-60)   | 1-85<br>(0-600-3-00)  | 6-46<br>(2-50-7-70)  |
| High-income North America | 15 to 19 | 2000 | 0-0115<br>(0-0-200)    | 0-0203<br>(0-0-300)   | 0-00440<br>(0-0)      | 0-00660<br>(0-0)     |
| High-income North America | 20 to 24 | 2000 | 0-0227<br>(0-0-300)    | 0-0400<br>(0-0-600)   | 0-00670<br>(0-0)      | 0-0104<br>(0-0)      |
| High-income North America | 25 to 29 | 2000 | 0-0665<br>(0-0-400)    | 0-116<br>(0-0-802)    | 0-0166<br>(0-0-300)   | 0-0282<br>(0-0-500)  |
| High-income North America | 30 to 34 | 2000 | 0-149<br>(0-0-500)     | 0-268<br>(0-1-00)     | 0-0770<br>(0-0-500)   | 0-138<br>(0-1-00)    |
| High-income North America | 35 to 39 | 2000 | 0-239<br>(0-0-600)     | 0-456<br>(0-1-10)     | 0-263<br>(0-0-800)    | 0-539<br>(0-1-30)    |
| High-income North America | 40 to 44 | 2000 | 0-340<br>(0-0-700)     | 0-706<br>(0-1-30)     | 0-430<br>(0-1-00)     | 1-06<br>(0-2-20)     |
| High-income North America | 45 to 49 | 2000 | 0-429<br>(0-100-0-900) | 0-962<br>(0-198-1-70) | 0-575<br>(0-200-1-00) | 1-59<br>(0-400-3-00) |
| High-income North America | 50 to 54 | 2000 | 0-538<br>(0-300-1-00)  | 1-36<br>(0-500-2-30)  | 0-730<br>(0-398-1-00) | 2-27<br>(0-700-4-10) |
| High-income North America | 55 to 59 | 2000 | 0-640<br>(0-400-1-00)  | 1-92<br>(0-800-3-30)  | 0-854<br>(0-400-2-00) | 3-03<br>(1-00-5-00)  |
| High-income North America | 60 to 64 | 2000 | 0-720<br>(0-500-1-00)  | 2-71<br>(1-10-4-50)   | 0-957<br>(0-500-2-00) | 3-77<br>(1-20-5-70)  |
| High-income North America | 65 to 69 | 2000 | 0-767<br>(0-500-1-00)  | 3-32<br>(1-30-5-20)   | 1-07<br>(0-500-2-10)  | 4-32<br>(1-50-6-10)  |
| High-income North America | 70 to 74 | 2000 | 0-794<br>(0-500-1-90)  | 3-97<br>(1-50-5-80)   | 1-20<br>(0-600-2-30)  | 4-92<br>(1-80-6-60)  |
| High-income North America | 75 to 79 | 2000 | 0-876<br>(0-500-2-10)  | 4-63<br>(1-70-6-40)   | 1-34<br>(0-600-2-40)  | 5-45<br>(2-10-7-00)  |
| High-income North America | 80 plus  | 2000 | 1-20<br>(0-500-2-80)   | 5-70<br>(2-10-7-30)   | 1-58<br>(0-600-2-90)  | 6-10<br>(2-40-7-50)  |
| High-income North America | 15 to 19 | 2010 | 0-0211<br>(0-0-300)    | 0-0370<br>(0-0-600)   | 0-00730<br>(0-0)      | 0-0112<br>(0-0)      |
| High-income North America | 20 to 24 | 2010 | 0-0360<br>(0-0-400)    | 0-0625<br>(0-0-700)   | 0-0109<br>(0-0)       | 0-0170<br>(0-0)      |
| High-income North America | 25 to 29 | 2010 | 0-0920<br>(0-0-500)    | 0-163<br>(0-1-00)     | 0-0268<br>(0-0-300)   | 0-0436<br>(0-0-700)  |
| High-income North America | 30 to 34 | 2010 | 0-197<br>(0-0-600)     | 0-360<br>(0-1-10)     | 0-106<br>(0-0-500)    | 0-187<br>(0-1-10)    |
| High-income North America | 35 to 39 | 2010 | 0-291<br>(0-0-700)     | 0-556<br>(0-1-20)     | 0-287<br>(0-0-800)    | 0-582<br>(0-1-40)    |
| High-income North America | 40 to 44 | 2010 | 0-384<br>(0-0-800)     | 0-784<br>(0-1-40)     | 0-452<br>(0-1-00)     | 1-05<br>(0-2-10)     |
| High-income North America | 45 to 49 | 2010 | 0-472<br>(0-200-0-900) | 1-02<br>(0-300-1-70)  | 0-571<br>(0-200-1-00) | 1-43<br>(0-400-2-60) |
| High-income North America | 50 to 54 | 2010 | 0-549<br>(0-300-1-00)  | 1-27<br>(0-500-2-10)  | 0-660<br>(0-300-1-00) | 1-76<br>(0-600-3-10) |
| High-income North America | 55 to 59 | 2010 | 0-626<br>(0-400-1-00)  | 1-57<br>(0-800-2-50)  | 0-743<br>(0-400-1-00) | 2-13<br>(0-898-3-60) |
| High-income North America | 60 to 64 | 2010 | 0-686<br>(0-400-1-00)  | 2-08<br>(1-10-3-30)   | 0-814<br>(0-500-1-00) | 2-77<br>(1-10-4-50)  |
| High-income North America | 65 to 69 | 2010 | 0-716<br>(0-500-1-00)  | 2-53<br>(1-20-4-00)   | 0-863<br>(0-500-1-50) | 3-40<br>(1-30-5-20)  |
| High-income North America | 70 to 74 | 2010 | 0-715<br>(0-500-1-00)  | 3-07<br>(1-40-4-80)   | 0-888<br>(0-600-2-00) | 3-99<br>(1-70-5-80)  |
| High-income North America | 75 to 79 | 2010 | 0-722<br>(0-500-1-00)  | 3-65<br>(1-50-5-50)   | 0-970<br>(0-600-2-00) | 4-58<br>(1-90-6-30)  |
| High-income North America | 80 plus  | 2010 | 0-854<br>(0-500-2-30)  | 4-89<br>(1-80-6-70)   | 1-24<br>(0-600-2-50)  | 5-49<br>(2-10-7-10)  |
| High-income North America | 15 to 19 | 2020 | 0-0207<br>(0-0-300)    | 0-0346<br>(0-0-600)   | 0-0132<br>(0-0)       | 0-0169<br>(0-0)      |
| High-income North America | 20 to 24 | 2020 | 0-0359<br>(0-0-400)    | 0-0611<br>(0-0-702)   | 0-0168<br>(0-0-102)   | 0-0227<br>(0-0-202)  |
| High-income North America | 25 to 29 | 2020 | 0-0951<br>(0-0-500)    | 0-166<br>(0-1-00)     | 0-0319<br>(0-0-400)   | 0-0496<br>(0-0-900)  |

|                           |          |      |                        |                       |                        |                      |
|---------------------------|----------|------|------------------------|-----------------------|------------------------|----------------------|
| High-income North America | 30 to 34 | 2020 | 0-211<br>(0-0-600)     | 0-384<br>(0-1-10)     | 0-119<br>(0-0-700)     | 0-212<br>(0-1-10)    |
| High-income North America | 35 to 39 | 2020 | 0-318<br>(0-0-700)     | 0-611<br>(0-1-20)     | 0-305<br>(0-0-800)     | 0-627<br>(0-1-40)    |
| High-income North America | 40 to 44 | 2020 | 0-419<br>(0-0-800)     | 0-846<br>(0-1-40)     | 0-475<br>(0-100-100)   | 1-10<br>(0-100-2-10) |
| High-income North America | 45 to 49 | 2020 | 0-498<br>(0-200-0-900) | 1-04<br>(0-300-1-70)  | 0-589<br>(0-300-100)   | 1-45<br>(0-500-2-60) |
| High-income North America | 50 to 54 | 2020 | 0-567<br>(0-300-100)   | 1-28<br>(0-600-2-10)  | 0-678<br>(0-398-100)   | 1-78<br>(0-700-3-10) |
| High-income North America | 55 to 59 | 2020 | 0-636<br>(0-400-100)   | 1-57<br>(0-800-2-50)  | 0-745<br>(0-400-100)   | 2-10<br>(0-900-3-50) |
| High-income North America | 60 to 64 | 2020 | 0-689<br>(0-500-100)   | 2-00<br>(1-10-3-20)   | 0-801<br>(0-500-100)   | 2-62<br>(1-10-4-30)  |
| High-income North America | 65 to 69 | 2020 | 0-709<br>(0-500-100)   | 2-36<br>(1-20-3-70)   | 0-846<br>(0-500-100)   | 3-18<br>(1-30-5-00)  |
| High-income North America | 70 to 74 | 2020 | 0-705<br>(0-500-100)   | 2-87<br>(1-30-4-50)   | 0-859<br>(0-600-190)   | 3-79<br>(1-60-5-60)  |
| High-income North America | 75 to 79 | 2020 | 0-698<br>(0-500-100)   | 3-36<br>(1-40-5-20)   | 0-901<br>(0-600-200)   | 4-37<br>(1-90-6-10)  |
| High-income North America | 80 plus  | 2020 | 0-782<br>(0-500-2-10)  | 4-64<br>(1-70-6-50)   | 1-13<br>(0-600-2-40)   | 5-30<br>(2-10-6-90)  |
| Southern Latin America    | 15 to 19 | 1990 | 0-0438<br>(0-0-300)    | 0-0717<br>(0-0-500)   | 0-00330<br>(0-0)       | 0-00560<br>(0-0)     |
| Southern Latin America    | 20 to 24 | 1990 | 0-0850<br>(0-0-300)    | 0-145<br>(0-0-600)    | 0-00510<br>(0-0-100)   | 0-00920<br>(0-0-100) |
| Southern Latin America    | 25 to 29 | 1990 | 0-143<br>(0-0-300)     | 0-258<br>(0-0-700)    | 0-0157<br>(0-0-200)    | 0-0274<br>(0-0-400)  |
| Southern Latin America    | 30 to 34 | 1990 | 0-206<br>(0-0-400)     | 0-386<br>(0-0-900)    | 0-0769<br>(0-0-300)    | 0-136<br>(0-0-700)   |
| Southern Latin America    | 35 to 39 | 1990 | 0-270<br>(0-0-400)     | 0-555<br>(0-1-10)     | 0-227<br>(0-0-400)     | 0-461<br>(0-1-10)    |
| Southern Latin America    | 40 to 44 | 1990 | 0-328<br>(0-0-500)     | 0-744<br>(0-1-20)     | 0-345<br>(0-0-500)     | 0-841<br>(0-1-60)    |
| Southern Latin America    | 45 to 49 | 1990 | 0-378<br>(0-100-0-500) | 0-950<br>(0-200-1-50) | 0-418<br>(0-200-100)   | 1-16<br>(0-300-2-10) |
| Southern Latin America    | 50 to 54 | 1990 | 0-439<br>(0-300-0-700) | 1-22<br>(0-500-2-00)  | 0-480<br>(0-300-100)   | 1-51<br>(0-600-2-60) |
| Southern Latin America    | 55 to 59 | 1990 | 0-501<br>(0-400-0-800) | 1-52<br>(0-800-2-30)  | 0-540<br>(0-400-100)   | 1-86<br>(0-800-3-20) |
| Southern Latin America    | 60 to 64 | 1990 | 0-572<br>(0-400-0-802) | 2-03<br>(1-10-3-10)   | 0-602<br>(0-400-100)   | 2-34<br>(1-10-4-00)  |
| Southern Latin America    | 65 to 69 | 1990 | 0-612<br>(0-500-100)   | 2-56<br>(1-40-4-10)   | 0-655<br>(0-500-100)   | 2-87<br>(1-30-4-90)  |
| Southern Latin America    | 70 to 74 | 1990 | 0-641<br>(0-500-100)   | 3-20<br>(1-60-5-00)   | 0-679<br>(0-500-1-50)  | 3-40<br>(1-50-5-40)  |
| Southern Latin America    | 75 to 79 | 1990 | 0-666<br>(0-500-100)   | 3-82<br>(1-80-5-70)   | 0-712<br>(0-500-1-90)  | 3-98<br>(1-60-5-90)  |
| Southern Latin America    | 80 plus  | 1990 | 0-789<br>(0-500-2-10)  | 4-87<br>(1-90-6-70)   | 0-792<br>(0-500-2-00)  | 4-78<br>(1-90-6-60)  |
| Southern Latin America    | 15 to 19 | 2000 | 0-00900<br>(0-0-102)   | 0-0149<br>(0-0-202)   | 0-00250<br>(0-0)       | 0-00370<br>(0-0)     |
| Southern Latin America    | 20 to 24 | 2000 | 0-0223<br>(0-0-200)    | 0-0363<br>(0-0-400)   | 0-00400<br>(0-0)       | 0-00650<br>(0-0)     |
| Southern Latin America    | 25 to 29 | 2000 | 0-0571<br>(0-0-300)    | 0-0940<br>(0-0-500)   | 0-00700<br>(0-0-100)   | 0-0125<br>(0-0-200)  |
| Southern Latin America    | 30 to 34 | 2000 | 0-118<br>(0-0-300)     | 0-205<br>(0-0-700)    | 0-0369<br>(0-0-300)    | 0-0653<br>(0-0-600)  |
| Southern Latin America    | 35 to 39 | 2000 | 0-195<br>(0-0-400)     | 0-366<br>(0-0-900)    | 0-152<br>(0-0-400)     | 0-289<br>(0-1-00)    |
| Southern Latin America    | 40 to 44 | 2000 | 0-288<br>(0-0-400)     | 0-600<br>(0-1-10)     | 0-301<br>(0-0-500)     | 0-672<br>(0-1-30)    |
| Southern Latin America    | 45 to 49 | 2000 | 0-366<br>(0-100-0-500) | 0-857<br>(0-100-1-30) | 0-401<br>(0-100-0-700) | 1-05<br>(0-200-2-00) |
| Southern Latin America    | 50 to 54 | 2000 | 0-436<br>(0-200-0-700) | 1-11<br>(0-400-1-70)  | 0-474<br>(0-300-100)   | 1-40<br>(0-500-2-30) |
| Southern Latin America    | 55 to 59 | 2000 | 0-509<br>(0-300-0-800) | 1-38<br>(0-700-2-10)  | 0-532<br>(0-300-100)   | 1-68<br>(0-700-2-80) |
| Southern Latin America    | 60 to 64 | 2000 | 0-577<br>(0-400-0-900) | 1-79<br>(1-10-2-70)   | 0-586<br>(0-400-100)   | 2-05<br>(1-00-3-40)  |
| Southern Latin America    | 65 to 69 | 2000 | 0-615<br>(0-500-0-900) | 2-18<br>(1-20-3-30)   | 0-629<br>(0-497-100)   | 2-43<br>(1-20-4-00)  |
| Southern Latin America    | 70 to 74 | 2000 | 0-631<br>(0-500-100)   | 2-62<br>(1-40-4-10)   | 0-652<br>(0-500-100)   | 2-92<br>(1-40-4-70)  |
| Southern Latin America    | 75 to 79 | 2000 | 0-638<br>(0-500-100)   | 3-09<br>(1-60-4-80)   | 0-669<br>(0-500-100)   | 3-38<br>(1-60-5-30)  |
| Southern Latin America    | 80 plus  | 2000 | 0-685<br>(0-500-1-50)  | 3-94<br>(1-60-5-90)   | 0-701<br>(0-500-1-50)  | 3-98<br>(1-60-5-90)  |
| Southern Latin America    | 15 to 19 | 2010 | 0-00670<br>(0-0-100)   | 0-0114<br>(0-0-200)   | 0-00370<br>(0-0)       | 0-00670<br>(0-0)     |
| Southern Latin America    | 20 to 24 | 2010 | 0-0132<br>(0-0-200)    | 0-0226<br>(0-0-300)   | 0-00420<br>(0-0)       | 0-00780<br>(0-0)     |

|                        |          |      |                        |                      |                        |                       |
|------------------------|----------|------|------------------------|----------------------|------------------------|-----------------------|
| Southern Latin America | 25 to 29 | 2010 | 0-0366<br>(0-0-300)    | 0-0607<br>(0-0-500)  | 0-00660<br>(0-0-100)   | 0-0116<br>(0-0-100)   |
| Southern Latin America | 30 to 34 | 2010 | 0-0809<br>(0-0-300)    | 0-136<br>(0-0-600)   | 0-0257<br>(0-0-300)    | 0-0467<br>(0-0-600)   |
| Southern Latin America | 35 to 39 | 2010 | 0-152<br>(0-0-400)     | 0-271<br>(0-0-800)   | 0-114<br>(0-0-400)     | 0-212<br>(0-1-00)     |
| Southern Latin America | 40 to 44 | 2010 | 0-259<br>(0-0-500)     | 0-511<br>(0-1-00)    | 0-264<br>(0-0-500)     | 0-557<br>(0-1-20)     |
| Southern Latin America | 45 to 49 | 2010 | 0-354<br>(0-0-600)     | 0-777<br>(0-1-20)    | 0-387<br>(0-0-800)     | 0-917<br>(0-1-70)     |
| Southern Latin America | 50 to 54 | 2010 | 0-441<br>(0-200-0-800) | 1-03<br>(0-400-1-60) | 0-479<br>(0-200-1-00)  | 1-27<br>(0-400-2-20)  |
| Southern Latin America | 55 to 59 | 2010 | 0-522<br>(0-300-0-800) | 1-29<br>(0-700-2-00) | 0-550<br>(0-300-1-00)  | 1-57<br>(0-698-2-60)  |
| Southern Latin America | 60 to 64 | 2010 | 0-592<br>(0-400-0-900) | 1-66<br>(1-00-2-50)  | 0-599<br>(0-400-1-00)  | 1-91<br>(0-900-3-10)  |
| Southern Latin America | 65 to 69 | 2010 | 0-625<br>(0-500-0-900) | 1-99<br>(1-20-3-00)  | 0-638<br>(0-400-1-00)  | 2-21<br>(1-10-3-60)   |
| Southern Latin America | 70 to 74 | 2010 | 0-636<br>(0-500-1-00)  | 2-33<br>(1-30-3-50)  | 0-646<br>(0-500-1-00)  | 2-60<br>(1-30-4-20)   |
| Southern Latin America | 75 to 79 | 2010 | 0-632<br>(0-500-1-00)  | 2-70<br>(1-40-4-20)  | 0-659<br>(0-500-1-00)  | 3-02<br>(1-50-4-80)   |
| Southern Latin America | 80 plus  | 2010 | 0-666<br>(0-500-1-00)  | 3-41<br>(1-50-5-30)  | 0-681<br>(0-500-1-10)  | 3-58<br>(1-50-5-40)   |
| Southern Latin America | 15 to 19 | 2020 | 0-0116<br>(0-0-200)    | 0-0189<br>(0-0-300)  | 0-00630<br>(0-0)       | 0-00900<br>(0-0)      |
| Southern Latin America | 20 to 24 | 2020 | 0-0202<br>(0-0-200)    | 0-0347<br>(0-0-400)  | 0-00890<br>(0-0)       | 0-0117<br>(0-0)       |
| Southern Latin America | 25 to 29 | 2020 | 0-0446<br>(0-0-300)    | 0-0753<br>(0-0-600)  | 0-0115<br>(0-0-102)    | 0-0184<br>(0-0-202)   |
| Southern Latin America | 30 to 34 | 2020 | 0-0972<br>(0-0-400)    | 0-168<br>(0-0-700)   | 0-0331<br>(0-0-300)    | 0-0583<br>(0-0-700)   |
| Southern Latin America | 35 to 39 | 2020 | 0-175<br>(0-0-400)     | 0-315<br>(0-0-900)   | 0-130<br>(0-0-400)     | 0-243<br>(0-1-00)     |
| Southern Latin America | 40 to 44 | 2020 | 0-283<br>(0-0-500)     | 0-551<br>(0-1-10)    | 0-284<br>(0-0-600)     | 0-598<br>(0-1-20)     |
| Southern Latin America | 45 to 49 | 2020 | 0-376<br>(0-0-700)     | 0-798<br>(0-1-30)    | 0-410<br>(0-0-900)     | 0-948<br>(0-1-70)     |
| Southern Latin America | 50 to 54 | 2020 | 0-467<br>(0-200-0-800) | 1-04<br>(0-400-1-60) | 0-507<br>(0-200-1-00)  | 1-27<br>(0-400-2-10)  |
| Southern Latin America | 55 to 59 | 2020 | 0-550<br>(0-300-0-900) | 1-30<br>(0-700-2-00) | 0-572<br>(0-300-1-00)  | 1-52<br>(0-700-2-40)  |
| Southern Latin America | 60 to 64 | 2020 | 0-618<br>(0-400-0-900) | 1-66<br>(1-00-2-40)  | 0-621<br>(0-400-1-00)  | 1-86<br>(1-00-3-00)   |
| Southern Latin America | 65 to 69 | 2020 | 0-641<br>(0-500-0-900) | 1-95<br>(1-10-2-90)  | 0-656<br>(0-500-1-00)  | 2-17<br>(1-10-3-40)   |
| Southern Latin America | 70 to 74 | 2020 | 0-646<br>(0-500-0-902) | 2-24<br>(1-30-3-30)  | 0-663<br>(0-500-1-00)  | 2-51<br>(1-30-4-00)   |
| Southern Latin America | 75 to 79 | 2020 | 0-641<br>(0-500-1-00)  | 2-55<br>(1-40-3-90)  | 0-668<br>(0-500-1-00)  | 2-88<br>(1-50-4-50)   |
| Southern Latin America | 80 plus  | 2020 | 0-661<br>(0-500-1-00)  | 3-19<br>(1-40-5-10)  | 0-681<br>(0-500-1-00)  | 3-43<br>(1-60-5-30)   |
| Western Europe         | 15 to 19 | 1990 | 0-00750<br>(0-0-100)   | 0-0123<br>(0-0-200)  | 0-00270<br>(0-0)       | 0-00480<br>(0-0)      |
| Western Europe         | 20 to 24 | 1990 | 0-0191<br>(0-0-200)    | 0-0335<br>(0-0-400)  | 0-00670<br>(0-0-00250) | 0-0118<br>(0-0-00250) |
| Western Europe         | 25 to 29 | 1990 | 0-0516<br>(0-0-300)    | 0-0883<br>(0-0-700)  | 0-0224<br>(0-0-300)    | 0-0375<br>(0-0-500)   |
| Western Europe         | 30 to 34 | 1990 | 0-0940<br>(0-0-400)    | 0-165<br>(0-0-800)   | 0-0873<br>(0-0-400)    | 0-161<br>(0-1-00)     |
| Western Europe         | 35 to 39 | 1990 | 0-130<br>(0-0-400)     | 0-233<br>(0-0-800)   | 0-237<br>(0-0-600)     | 0-493<br>(0-1-30)     |
| Western Europe         | 40 to 44 | 1990 | 0-177<br>(0-0-400)     | 0-328<br>(0-1-00)    | 0-351<br>(0-0-702)     | 0-863<br>(0-1-90)     |
| Western Europe         | 45 to 49 | 1990 | 0-255<br>(0-0-500)     | 0-494<br>(0-1-10)    | 0-442<br>(0-100-1-00)  | 1-27<br>(0-200-2-50)  |
| Western Europe         | 50 to 54 | 1990 | 0-342<br>(0-0-700)     | 0-741<br>(0-1-30)    | 0-524<br>(0-300-1-00)  | 1-68<br>(0-400-3-20)  |
| Western Europe         | 55 to 59 | 1990 | 0-443<br>(0-200-1-00)  | 1-12<br>(0-300-2-00) | 0-628<br>(0-300-1-00)  | 2-22<br>(0-700-4-10)  |
| Western Europe         | 60 to 64 | 1990 | 0-568<br>(0-400-1-00)  | 1-92<br>(0-800-3-30) | 0-746<br>(0-400-1-90)  | 3-01<br>(1-00-5-10)   |
| Western Europe         | 65 to 69 | 1990 | 0-643<br>(0-400-1-00)  | 2-85<br>(1-10-4-70)  | 0-846<br>(0-500-2-00)  | 3-81<br>(1-20-5-80)   |
| Western Europe         | 70 to 74 | 1990 | 0-685<br>(0-500-1-20)  | 3-82<br>(1-50-5-70)  | 0-900<br>(0-500-2-10)  | 4-57<br>(1-60-6-40)   |
| Western Europe         | 75 to 79 | 1990 | 0-712<br>(0-500-2-00)  | 4-37<br>(1-70-6-20)  | 0-910<br>(0-500-2-20)  | 4-93<br>(1-90-6-70)   |
| Western Europe         | 80 plus  | 1990 | 0-765<br>(0-500-2-30)  | 4-91<br>(1-90-6-80)  | 0-929<br>(0-500-2-50)  | 5-30<br>(2-00-7-00)   |
| Western Europe         | 15 to 19 | 2000 | 0-00330<br>(0-0)       | 0-00520<br>(0-0)     | 0-00180<br>(0-0)       | 0-00300<br>(0-0)      |

|                |          |      |               |              |              |              |
|----------------|----------|------|---------------|--------------|--------------|--------------|
|                |          |      | 0-0119        | 0-0203       | 0-00660      | 0-00980      |
| Western Europe | 20 to 24 | 2000 | (0-0-200)     | (0-0-300)    | (0-0)        | (0-0)        |
|                |          |      | 0-0366        | 0-0619       | 0-0155       | 0-0259       |
| Western Europe | 25 to 29 | 2000 | (0-0-300)     | (0-0-600)    | (0-0-200)    | (0-0-400)    |
|                |          |      | 0-0756        | 0-127        | 0-0608       | 0-109        |
| Western Europe | 30 to 34 | 2000 | (0-0-400)     | (0-0-700)    | (0-0-400)    | (0-1-00)     |
|                |          |      | 0-112         | 0-195        | 0-192        | 0-380        |
| Western Europe | 35 to 39 | 2000 | (0-0-400)     | (0-0-800)    | (0-0-600)    | (0-1-10)     |
|                |          |      | 0-166         | 0-303        | 0-326        | 0-726        |
| Western Europe | 40 to 44 | 2000 | (0-0-400)     | (0-1-00)     | (0-0-800)    | (0-1-50)     |
|                |          |      | 0-229         | 0-429        | 0-410        | 1-04         |
| Western Europe | 45 to 49 | 2000 | (0-0-500)     | (0-1-00)     | (0-1-00)     | (0-2-00)     |
|                |          |      | 0-299         | 0-590        | 0-484        | 1-37         |
| Western Europe | 50 to 54 | 2000 | (0-0-700)     | (0-1-10)     | (0-200-1-00) | (0-300-2-50) |
|                |          |      | 0-397         | 0-871        | 0-568        | 1-82         |
| Western Europe | 55 to 59 | 2000 | (0-100-0-900) | (0-100-1-50) | (0-300-1-00) | (0-600-3-30) |
|                |          |      | 0-522         | 1-41         | 0-656        | 2-37         |
| Western Europe | 60 to 64 | 2000 | (0-300-1-00)  | (0-698-2-30) | (0-400-1-00) | (0-900-4-10) |
|                |          |      | 0-604         | 2-10         | 0-733        | 3-07         |
| Western Europe | 65 to 69 | 2000 | (0-400-1-00)  | (1-00-3-50)  | (0-400-1-60) | (1-10-5-00)  |
|                |          |      | 0-639         | 2-95         | 0-764        | 3-83         |
| Western Europe | 70 to 74 | 2000 | (0-500-1-00)  | (1-20-4-80)  | (0-500-2-00) | (1-40-5-80)  |
|                |          |      | 0-664         | 3-67         | 0-813        | 4-44         |
| Western Europe | 75 to 79 | 2000 | (0-500-1-00)  | (1-50-5-60)  | (0-500-2-00) | (1-70-6-20)  |
|                |          |      | 0-734         | 4-58         | 0-888        | 5-09         |
| Western Europe | 80 plus  | 2000 | (0-500-2-00)  | (1-70-6-40)  | (0-500-2-30) | (2-00-6-80)  |
|                |          |      | 0-00130       | 0-00220      | 0-000800     | 0-00150      |
| Western Europe | 15 to 19 | 2010 | (0-0)         | (0-0)        | (0-0)        | (0-0)        |
|                |          |      | 0-0148        | 0-0251       | 0-00630      | 0-00910      |
| Western Europe | 20 to 24 | 2010 | (0-0-200)     | (0-0-400)    | (0-0)        | (0-0)        |
|                |          |      | 0-0537        | 0-0906       | 0-0222       | 0-0367       |
| Western Europe | 25 to 29 | 2010 | (0-0-400)     | (0-0-700)    | (0-0-300)    | (0-0-502)    |
|                |          |      | 0-0900        | 0-153        | 0-0813       | 0-148        |
| Western Europe | 30 to 34 | 2010 | (0-0-400)     | (0-0-800)    | (0-0-400)    | (0-1-00)     |
|                |          |      | 0-113         | 0-193        | 0-205        | 0-408        |
| Western Europe | 35 to 39 | 2010 | (0-0-400)     | (0-0-800)    | (0-0-600)    | (0-1-20)     |
|                |          |      | 0-162         | 0-287        | 0-329        | 0-709        |
| Western Europe | 40 to 44 | 2010 | (0-0-500)     | (0-1-00)     | (0-0-800)    | (0-1-50)     |
|                |          |      | 0-232         | 0-425        | 0-413        | 0-966        |
| Western Europe | 45 to 49 | 2010 | (0-0-600)     | (0-1-00)     | (0-1-00)     | (0-1-90)     |
|                |          |      | 0-302         | 0-576        | 0-476        | 1-21         |
| Western Europe | 50 to 54 | 2010 | (0-0-700)     | (0-1-10)     | (0-200-1-00) | (0-300-2-20) |
|                |          |      | 0-384         | 0-785        | 0-533        | 1-47         |
| Western Europe | 55 to 59 | 2010 | (0-0-800)     | (0-1-30)     | (0-300-1-00) | (0-500-2-60) |
|                |          |      | 0-492         | 1-12         | 0-605        | 1-89         |
| Western Europe | 60 to 64 | 2010 | (0-300-0-900) | (0-400-1-80) | (0-400-1-00) | (0-800-3-30) |
|                |          |      | 0-568         | 1-54         | 0-663        | 2-43         |
| Western Europe | 65 to 69 | 2010 | (0-400-0-900) | (0-800-2-50) | (0-400-1-00) | (1-00-4-10)  |
|                |          |      | 0-608         | 2-11         | 0-693        | 3-03         |
| Western Europe | 70 to 74 | 2010 | (0-400-0-900) | (1-10-3-40)  | (0-500-1-00) | (1-20-4-90)  |
|                |          |      | 0-622         | 2-69         | 0-712        | 3-64         |
| Western Europe | 75 to 79 | 2010 | (0-500-1-00)  | (1-30-4-30)  | (0-500-1-10) | (1-50-5-50)  |
|                |          |      | 0-663         | 3-71         | 0-765        | 4-46         |
| Western Europe | 80 plus  | 2010 | (0-500-1-01)  | (1-50-5-70)  | (0-500-2-00) | (1-70-6-20)  |
|                |          |      | 0-00240       | 0-00410      | 0-00130      | 0-00240      |
| Western Europe | 15 to 19 | 2020 | (0-0)         | (0-0)        | (0-0)        | (0-0)        |
|                |          |      | 0-0305        | 0-0510       | 0-0106       | 0-0155       |
| Western Europe | 20 to 24 | 2020 | (0-0-302)     | (0-0-600)    | (0-0)        | (0-0)        |
|                |          |      | 0-114         | 0-191        | 0-0381       | 0-0625       |
| Western Europe | 25 to 29 | 2020 | (0-0-502)     | (0-1-00)     | (0-0-402)    | (0-0-800)    |
|                |          |      | 0-157         | 0-265        | 0-124        | 0-222        |
| Western Europe | 30 to 34 | 2020 | (0-0-600)     | (0-1-00)     | (0-0-600)    | (0-1-10)     |
|                |          |      | 0-175         | 0-297        | 0-254        | 0-493        |
| Western Europe | 35 to 39 | 2020 | (0-0-600)     | (0-1-00)     | (0-0-700)    | (0-1-30)     |
|                |          |      | 0-207         | 0-358        | 0-358        | 0-764        |
| Western Europe | 40 to 44 | 2020 | (0-0-600)     | (0-1-00)     | (0-0-800)    | (0-1-60)     |
|                |          |      | 0-264         | 0-476        | 0-436        | 0-988        |
| Western Europe | 45 to 49 | 2020 | (0-0-700)     | (0-1-10)     | (0-0-900)    | (0-1-90)     |
|                |          |      | 0-339         | 0-642        | 0-502        | 1-23         |
| Western Europe | 50 to 54 | 2020 | (0-0-800)     | (0-1-20)     | (0-200-1-00) | (0-300-2-20) |
|                |          |      | 0-429         | 0-855        | 0-553        | 1-45         |
| Western Europe | 55 to 59 | 2020 | (0-0-800)     | (0-1-40)     | (0-300-1-00) | (0-500-2-50) |
|                |          |      | 0-524         | 1-16         | 0-611        | 1-83         |
| Western Europe | 60 to 64 | 2020 | (0-300-0-802) | (0-500-1-80) | (0-400-1-00) | (0-798-3-10) |
|                |          |      | 0-576         | 1-49         | 0-658        | 2-27         |
| Western Europe | 65 to 69 | 2020 | (0-400-0-900) | (0-800-2-30) | (0-400-1-00) | (1-00-3-70)  |
|                |          |      | 0-602         | 1-94         | 0-680        | 2-85         |
| Western Europe | 70 to 74 | 2020 | (0-400-0-900) | (1-00-3-10)  | (0-500-1-00) | (1-20-4-50)  |
|                |          |      | 0-616         | 2-45         | 0-702        | 3-45         |
| Western Europe | 75 to 79 | 2020 | (0-500-0-900) | (1-20-3-90)  | (0-500-1-00) | (1-40-5-30)  |
|                |          |      | 0-647         | 3-39         | 0-740        | 4-25         |
| Western Europe | 80 plus  | 2020 | (0-500-1-00)  | (1-40-5-30)  | (0-500-1-90) | (1-60-6-10)  |

|                      |          |      |               |              |              |              |
|----------------------|----------|------|---------------|--------------|--------------|--------------|
|                      |          |      | 0-318         | 0-562        | 0-0684       | 0-0869       |
| Andean Latin America | 15 to 19 | 1990 | (0-2-50)      | (0-6-50)     | (0-0-202)    | (0-0-400)    |
|                      |          |      | 0-431         | 0-865        | 0-0888       | 0-118        |
| Andean Latin America | 20 to 24 | 1990 | (0-3-00)      | (0-10-0)     | (0-1-00)     | (0-0-602)    |
|                      |          |      | 0-509         | 1-03         | 0-108        | 0-147        |
| Andean Latin America | 25 to 29 | 1990 | (0-3-00)      | (0-10-0)     | (0-1-00)     | (0-0-902)    |
|                      |          |      | 0-476         | 1-02         | 0-168        | 0-282        |
| Andean Latin America | 30 to 34 | 1990 | (0-2-60)      | (0-8-30)     | (0-2-00)     | (0-2-60)     |
|                      |          |      | 0-449         | 0-976        | 0-219        | 0-397        |
| Andean Latin America | 35 to 39 | 1990 | (0-2-30)      | (0-5-60)     | (0-2-00)     | (0-2-50)     |
|                      |          |      | 0-465         | 1-04         | 0-292        | 0-584        |
| Andean Latin America | 40 to 44 | 1990 | (0-100-2-10)  | (0-198-4-70) | (0-1-00)     | (0-2-40)     |
|                      |          |      | 0-469         | 1-14         | 0-366        | 0-795        |
| Andean Latin America | 45 to 49 | 1990 | (0-200-2-00)  | (0-300-3-20) | (0-1-00)     | (0-2-40)     |
|                      |          |      | 0-499         | 1-30         | 0-440        | 1-02         |
| Andean Latin America | 50 to 54 | 1990 | (0-300-1-01)  | (0-500-3-10) | (0-100-1-00) | (0-200-2-50) |
|                      |          |      | 0-543         | 1-43         | 0-497        | 1-21         |
| Andean Latin America | 55 to 59 | 1990 | (0-300-1-00)  | (0-700-3-00) | (0-200-1-00) | (0-400-3-00) |
|                      |          |      | 0-594         | 1-70         | 0-543        | 1-48         |
| Andean Latin America | 60 to 64 | 1990 | (0-400-1-00)  | (0-898-3-50) | (0-300-1-01) | (0-600-3-40) |
|                      |          |      | 0-624         | 1-99         | 0-588        | 1-77         |
| Andean Latin America | 65 to 69 | 1990 | (0-400-1-00)  | (1-00-4-20)  | (0-400-2-00) | (0-800-4-00) |
|                      |          |      | 0-645         | 2-31         | 0-623        | 2-08         |
| Andean Latin America | 70 to 74 | 1990 | (0-500-1-00)  | (1-10-4-70)  | (0-400-2-00) | (0-900-5-00) |
|                      |          |      | 0-652         | 2-60         | 0-649        | 2-45         |
| Andean Latin America | 75 to 79 | 1990 | (0-500-1-01)  | (1-20-5-10)  | (0-400-2-00) | (1-00-5-50)  |
|                      |          |      | 0-709         | 3-53         | 0-704        | 3-17         |
| Andean Latin America | 80 plus  | 1990 | (0-500-1-60)  | (1-40-6-00)  | (0-500-2-00) | (1-20-6-10)  |
|                      |          |      | 0-0884        | 0-154        | 0-0102       | 0-0177       |
| Andean Latin America | 15 to 19 | 2000 | (0-0-300)     | (0-0-602)    | (0-0-100)    | (0-0-200)    |
|                      |          |      | 0-193         | 0-333        | 0-0146       | 0-0217       |
| Andean Latin America | 20 to 24 | 2000 | (0-2-20)      | (0-3-00)     | (0-0-102)    | (0-0-202)    |
|                      |          |      | 0-254         | 0-491        | 0-0266       | 0-0441       |
| Andean Latin America | 25 to 29 | 2000 | (0-2-10)      | (0-3-10)     | (0-0-200)    | (0-0-400)    |
|                      |          |      | 0-273         | 0-541        | 0-0671       | 0-116        |
| Andean Latin America | 30 to 34 | 2000 | (0-2-00)      | (0-2-60)     | (0-0-300)    | (0-0-600)    |
|                      |          |      | 0-302         | 0-622        | 0-130        | 0-231        |
| Andean Latin America | 35 to 39 | 2000 | (0-0-600)     | (0-2-10)     | (0-0-400)    | (0-1-00)     |
|                      |          |      | 0-366         | 0-798        | 0-224        | 0-437        |
| Andean Latin America | 40 to 44 | 2000 | (0-0-700)     | (0-2-00)     | (0-0-500)    | (0-1-10)     |
|                      |          |      | 0-427         | 1-01         | 0-326        | 0-691        |
| Andean Latin America | 45 to 49 | 2000 | (0-200-0-700) | (0-398-2-00) | (0-0-802)    | (0-1-50)     |
|                      |          |      | 0-494         | 1-21         | 0-421        | 0-943        |
| Andean Latin America | 50 to 54 | 2000 | (0-300-0-800) | (0-600-2-20) | (0-100-1-00) | (0-200-2-00) |
|                      |          |      | 0-556         | 1-38         | 0-486        | 1-14         |
| Andean Latin America | 55 to 59 | 2000 | (0-400-0-900) | (0-800-2-30) | (0-200-1-00) | (0-400-2-20) |
|                      |          |      | 0-616         | 1-65         | 0-544        | 1-38         |
| Andean Latin America | 60 to 64 | 2000 | (0-400-0-902) | (1-00-2-60)  | (0-300-1-00) | (0-600-2-50) |
|                      |          |      | 0-641         | 1-87         | 0-580        | 1-60         |
| Andean Latin America | 65 to 69 | 2000 | (0-400-1-00)  | (1-10-3-00)  | (0-400-1-00) | (0-800-2-80) |
|                      |          |      | 0-652         | 2-15         | 0-604        | 1-88         |
| Andean Latin America | 70 to 74 | 2000 | (0-500-1-00)  | (1-20-3-50)  | (0-400-1-00) | (1-00-3-30)  |
|                      |          |      | 0-655         | 2-41         | 0-627        | 2-25         |
| Andean Latin America | 75 to 79 | 2000 | (0-500-1-00)  | (1-30-4-00)  | (0-500-1-00) | (1-10-4-20)  |
|                      |          |      | 0-695         | 3-29         | 0-678        | 3-00         |
| Andean Latin America | 80 plus  | 2000 | (0-500-1-00)  | (1-50-5-20)  | (0-500-1-50) | (1-30-5-20)  |
|                      |          |      | 0-0549        | 0-0932       | 0-0114       | 0-0197       |
| Andean Latin America | 15 to 19 | 2010 | (0-0-300)     | (0-0-600)    | (0-0-200)    | (0-0-300)    |
|                      |          |      | 0-0870        | 0-151        | 0-0102       | 0-0184       |
| Andean Latin America | 20 to 24 | 2010 | (0-0-300)     | (0-0-700)    | (0-0-200)    | (0-0-300)    |
|                      |          |      | 0-155         | 0-278        | 0-0197       | 0-0333       |
| Andean Latin America | 25 to 29 | 2010 | (0-0-400)     | (0-0-900)    | (0-0-200)    | (0-0-400)    |
|                      |          |      | 0-216         | 0-408        | 0-0533       | 0-0912       |
| Andean Latin America | 30 to 34 | 2010 | (0-0-400)     | (0-1-00)     | (0-0-300)    | (0-0-600)    |
|                      |          |      | 0-267         | 0-535        | 0-111        | 0-201        |
| Andean Latin America | 35 to 39 | 2010 | (0-0-500)     | (0-1-10)     | (0-0-400)    | (0-1-00)     |
|                      |          |      | 0-339         | 0-719        | 0-210        | 0-413        |
| Andean Latin America | 40 to 44 | 2010 | (0-0-600)     | (0-1-30)     | (0-0-500)    | (0-1-10)     |
|                      |          |      | 0-438         | 0-998        | 0-327        | 0-682        |
| Andean Latin America | 45 to 49 | 2010 | (0-200-0-700) | (0-400-1-60) | (0-0-700)    | (0-1-30)     |
|                      |          |      | 0-528         | 1-23         | 0-435        | 0-953        |
| Andean Latin America | 50 to 54 | 2010 | (0-300-0-800) | (0-700-2-00) | (0-100-1-00) | (0-200-1-70) |
|                      |          |      | 0-597         | 1-40         | 0-518        | 1-18         |
| Andean Latin America | 55 to 59 | 2010 | (0-400-0-900) | (0-800-2-20) | (0-300-1-00) | (0-500-2-10) |
|                      |          |      | 0-646         | 1-63         | 0-572        | 1-41         |
| Andean Latin America | 60 to 64 | 2010 | (0-400-1-00)  | (1-00-2-40)  | (0-400-1-00) | (0-700-2-30) |
|                      |          |      | 0-673         | 1-81         | 0-610        | 1-61         |
| Andean Latin America | 65 to 69 | 2010 | (0-500-1-00)  | (1-10-2-60)  | (0-400-1-00) | (0-900-2-60) |
|                      |          |      | 0-680         | 2-04         | 0-637        | 1-86         |
| Andean Latin America | 70 to 74 | 2010 | (0-500-1-00)  | (1-20-3-00)  | (0-400-1-00) | (1-00-3-00)  |
|                      |          |      | 0-680         | 2-26         | 0-651        | 2-17         |
| Andean Latin America | 75 to 79 | 2010 | (0-500-1-00)  | (1-30-3-40)  | (0-500-1-00) | (1-10-3-60)  |

|                      |          |      |                                 |                              |                                 |                               |
|----------------------|----------|------|---------------------------------|------------------------------|---------------------------------|-------------------------------|
| Andean Latin America | 80 plus  | 2010 | 0-708<br>(0-500-1-00)<br>0-0616 | 3-03<br>(1-50-4-80)<br>0-107 | 0-689<br>(0-500-1-00)<br>0-0139 | 2-83<br>(1-30-4-70)<br>0-0232 |
| Andean Latin America | 15 to 19 | 2020 | (0-0-300)<br>0-0897             | (0-0-700)<br>0-155           | (0-0-200)<br>0-0133             | (0-0-300)<br>0-0232           |
| Andean Latin America | 20 to 24 | 2020 | (0-0-300)<br>0-170              | (0-0-602)<br>0-309           | (0-0-200)<br>0-0229             | (0-0-400)<br>0-0408           |
| Andean Latin America | 25 to 29 | 2020 | (0-0-400)<br>0-235              | (0-1-00)<br>0-451            | (0-0-200)<br>0-0721             | (0-0-400)<br>0-127            |
| Andean Latin America | 30 to 34 | 2020 | (0-0-400)<br>0-301              | (0-1-00)<br>0-613            | (0-0-300)<br>0-146              | (0-0-700)<br>0-273            |
| Andean Latin America | 35 to 39 | 2020 | (0-0-500)<br>0-380              | (0-1-10)<br>0-824            | (0-0-400)<br>0-259              | (0-1-00)<br>0-523             |
| Andean Latin America | 40 to 44 | 2020 | (0-100-0-700)<br>0-487          | (0-100-1-40)<br>1-10         | (0-0-600)<br>0-385              | (0-1-20)<br>0-810             |
| Andean Latin America | 45 to 49 | 2020 | (0-300-0-800)<br>0-576          | (0-498-1-80)<br>1-33         | (0-0-800)<br>0-490              | (0-1-50)<br>1-08              |
| Andean Latin America | 50 to 54 | 2020 | (0-300-0-900)<br>0-644          | (0-700-2-10)<br>1-52         | (0-200-1-00)<br>0-582           | (0-300-2-00)<br>1-34          |
| Andean Latin America | 55 to 59 | 2020 | (0-400-0-902)<br>0-691          | (0-900-2-30)<br>1-77         | (0-300-1-00)<br>0-633           | (0-600-2-20)<br>1-58          |
| Andean Latin America | 60 to 64 | 2020 | (0-500-1-00)<br>0-712           | (1-10-2-50)<br>1-95          | (0-400-1-00)<br>0-674           | (0-800-2-50)<br>1-81          |
| Andean Latin America | 65 to 69 | 2020 | (0-500-1-00)<br>0-716           | (1-20-2-80)<br>2-19          | (0-400-1-00)<br>0-692           | (1-00-2-90)<br>2-07           |
| Andean Latin America | 70 to 74 | 2020 | (0-500-1-00)<br>0-715           | (1-30-3-20)<br>2-45          | (0-500-1-00)<br>0-696           | (1-10-3-30)<br>2-39           |
| Andean Latin America | 75 to 79 | 2020 | (0-500-1-00)<br>0-736           | (1-40-3-70)<br>3-25          | (0-500-1-00)<br>0-724           | (1-30-4-00)<br>3-10           |
| Andean Latin America | 80 plus  | 2020 | (0-500-1-00)<br>0-0427          | (1-60-5-00)<br>0-0729        | (0-500-1-00)<br>0-00290         | (1-40-5-00)<br>0-00520        |
| Caribbean            | 15 to 19 | 1990 | (0-0-300)<br>0-0990             | (0-0-600)<br>0-171           | (0-0)<br>0-00580                | (0-0)<br>0-0106               |
| Caribbean            | 20 to 24 | 1990 | (0-0-400)<br>0-206              | (0-1-00)<br>0-388            | (0-0-00250)<br>0-0237           | (0-0-00250)<br>0-0411         |
| Caribbean            | 25 to 29 | 1990 | (0-0-500)<br>0-333              | (0-1-10)<br>0-715            | (0-0-300)<br>0-109              | (0-0-500)<br>0-195            |
| Caribbean            | 30 to 34 | 1990 | (0-0-600)<br>0-414              | (0-1-50)<br>1-02             | (0-0-400)<br>0-254              | (0-0-900)<br>0-532            |
| Caribbean            | 35 to 39 | 1990 | (0-200-0-600)<br>0-498          | (0-300-2-10)<br>1-43         | (0-0-500)<br>0-394              | (0-1-20)<br>0-973             |
| Caribbean            | 40 to 44 | 1990 | (0-300-0-800)<br>0-584          | (0-700-2-50)<br>1-90         | (0-100-0-700)<br>0-499          | (0-200-1-90)<br>1-46          |
| Caribbean            | 45 to 49 | 1990 | (0-400-0-900)<br>0-658          | (1-00-3-00)<br>2-30          | (0-300-1-00)<br>0-601           | (0-500-2-60)<br>1-97          |
| Caribbean            | 50 to 54 | 1990 | (0-500-1-00)<br>0-716           | (1-30-3-60)<br>2-73          | (0-400-1-00)<br>0-666           | (0-900-3-40)<br>2-37          |
| Caribbean            | 55 to 59 | 1990 | (0-500-1-00)<br>0-759           | (1-50-4-20)<br>3-27          | (0-400-1-00)<br>0-718           | (1-10-4-10)<br>2-87           |
| Caribbean            | 60 to 64 | 1990 | (0-500-1-00)<br>0-793           | (1-80-5-00)<br>3-74          | (0-500-1-00)<br>0-771           | (1-30-4-80)<br>3-40           |
| Caribbean            | 65 to 69 | 1990 | (0-600-1-00)<br>0-780           | (2-00-5-50)<br>4-16          | (0-500-1-50)<br>0-785           | (1-50-5-40)<br>3-95           |
| Caribbean            | 70 to 74 | 1990 | (0-600-1-50)<br>0-813           | (2-10-5-90)<br>4-63          | (0-500-1-90)<br>0-847           | (1-70-6-00)<br>4-48           |
| Caribbean            | 75 to 79 | 1990 | (0-600-2-00)<br>0-885           | (2-20-6-30)<br>5-20          | (0-500-2-00)<br>0-993           | (1-90-6-30)<br>5-20           |
| Caribbean            | 80 plus  | 1990 | (0-600-2-20)<br>0-0468          | (2-20-6-80)<br>0-0815        | (0-600-2-30)<br>0-00480         | (2-00-6-90)<br>0-00760        |
| Caribbean            | 15 to 19 | 2000 | (0-0-300)<br>0-114              | (0-0-600)<br>0-200           | (0-0)<br>0-00800                | (0-0)<br>0-0138               |
| Caribbean            | 20 to 24 | 2000 | (0-0-400)<br>0-223              | (0-0-900)<br>0-424           | (0-0)<br>0-0214                 | (0-0)<br>0-0363               |
| Caribbean            | 25 to 29 | 2000 | (0-0-500)<br>0-333              | (0-1-10)<br>0-707            | (0-0-300)<br>0-102              | (0-0-500)<br>0-181            |
| Caribbean            | 30 to 34 | 2000 | (0-0-600)<br>0-418              | (0-1-30)<br>0-988            | (0-0-400)<br>0-256              | (0-0-900)<br>0-526            |
| Caribbean            | 35 to 39 | 2000 | (0-200-0-700)<br>0-516          | (0-400-1-70)<br>1-38         | (0-0-500)<br>0-401              | (0-1-20)<br>0-968             |
| Caribbean            | 40 to 44 | 2000 | (0-300-0-800)<br>0-606          | (0-700-2-20)<br>1-86         | (0-100-0-700)<br>0-512          | (0-198-1-80)<br>1-41          |
| Caribbean            | 45 to 49 | 2000 | (0-400-0-900)<br>0-678          | (1-10-2-80)<br>2-25          | (0-300-1-00)<br>0-620           | (0-600-2-40)<br>1-93          |
| Caribbean            | 50 to 54 | 2000 | (0-500-1-00)<br>0-737           | (1-30-3-40)<br>2-70          | (0-400-1-00)<br>0-696           | (0-900-3-20)<br>2-38          |
| Caribbean            | 55 to 59 | 2000 | (0-500-1-00)<br>0-770           | (1-60-4-10)<br>3-22          | (0-497-1-00)<br>0-734           | (1-10-3-90)<br>2-82           |
| Caribbean            | 60 to 64 | 2000 | (0-600-1-00)<br>0-790           | (1-80-4-80)<br>3-62          | (0-500-1-00)<br>0-763           | (1-30-4-60)<br>3-29           |
| Caribbean            | 65 to 69 | 2000 | (0-600-1-00)<br>0-767           | (2-10-5-30)<br>3-98          | (0-500-1-00)<br>0-768           | (1-60-5-10)<br>3-77           |
| Caribbean            | 70 to 74 | 2000 | (0-600-1-00)                    | (2-10-5-60)                  | (0-500-1-50)                    | (1-80-5-60)                   |



|                       |          |      |                                |                             |                                |                             |
|-----------------------|----------|------|--------------------------------|-----------------------------|--------------------------------|-----------------------------|
| Caribbean             | 75 to 79 | 2000 | 0-768<br>(0-600-1-10)<br>0-804 | 4-33<br>(2-20-6-00)<br>4-85 | 0-791<br>(0-500-1-90)<br>0-862 | 4-20<br>(2-00-6-00)<br>4-83 |
| Caribbean             | 80 plus  | 2000 | (0-600-2-00)<br>0-0512         | (2-10-6-50)<br>0-0895       | (0-600-2-00)<br>0-00850        | (2-00-6-50)<br>0-0122       |
| Caribbean             | 15 to 19 | 2010 | (0-0-300)<br>0-124             | (0-0-700)<br>0-220          | (0-0)<br>0-0135                | (0-0)<br>0-0190             |
| Caribbean             | 20 to 24 | 2010 | (0-0-400)<br>0-233             | (0-1-00)<br>0-450           | (0-0-102)<br>0-0249            | (0-0-202)<br>0-0389         |
| Caribbean             | 25 to 29 | 2010 | (0-0-500)<br>0-350             | (0-1-10)<br>0-748           | (0-0-300)<br>0-0807            | (0-0-500)<br>0-146          |
| Caribbean             | 30 to 34 | 2010 | (0-0-600)<br>0-436             | (0-1-40)<br>1-02            | (0-0-400)<br>0-235             | (0-1-00)<br>0-471           |
| Caribbean             | 35 to 39 | 2010 | (0-200-0-700)<br>0-526         | (0-400-1-70)<br>1-36        | (0-0-500)<br>0-389             | (0-1-20)<br>0-915           |
| Caribbean             | 40 to 44 | 2010 | (0-300-0-800)<br>0-615         | (0-700-2-20)<br>1-82        | (0-100-0-700)<br>0-510         | (0-100-1-70)<br>1-36        |
| Caribbean             | 45 to 49 | 2010 | (0-400-0-900)<br>0-684         | (1-10-2-70)<br>2-21         | (0-300-0-900)<br>0-613         | (0-598-2-30)<br>1-84        |
| Caribbean             | 50 to 54 | 2010 | (0-500-1-00)<br>0-732          | (1-30-3-30)<br>2-58         | (0-400-1-00)<br>0-678          | (0-900-3-00)<br>2-23        |
| Caribbean             | 55 to 59 | 2010 | (0-500-1-00)<br>0-768          | (1-50-3-90)<br>3-11         | (0-400-1-00)<br>0-721          | (1-10-3-60)<br>2-71         |
| Caribbean             | 60 to 64 | 2010 | (0-600-1-00)<br>0-783          | (1-80-4-60)<br>3-45         | (0-500-1-00)<br>0-753          | (1-30-4-30)<br>3-17         |
| Caribbean             | 65 to 69 | 2010 | (0-600-1-00)<br>0-756          | (2-00-5-10)<br>3-82         | (0-500-1-00)<br>0-754          | (1-50-4-90)<br>3-61         |
| Caribbean             | 70 to 74 | 2010 | (0-600-1-00)<br>0-750          | (2-10-5-40)<br>4-08         | (0-500-1-00)<br>0-761          | (1-80-5-40)<br>3-95         |
| Caribbean             | 75 to 79 | 2010 | (0-600-1-00)<br>0-777          | (2-20-5-80)<br>4-61         | (0-597-1-50)<br>0-802          | (1-90-5-70)<br>4-50         |
| Caribbean             | 80 plus  | 2010 | (0-600-1-90)<br>0-0764         | (2-00-6-40)<br>0-137        | (0-600-2-00)<br>0-0100         | (2-00-6-20)<br>0-0130       |
| Caribbean             | 15 to 19 | 2020 | (0-0-400)<br>0-175             | (0-0-800)<br>0-318          | (0-0)<br>0-0164                | (0-0)<br>0-0238             |
| Caribbean             | 20 to 24 | 2020 | (0-0-500)<br>0-280             | (0-1-00)<br>0-555           | (0-0-200)<br>0-0321            | (0-0-400)<br>0-0521         |
| Caribbean             | 25 to 29 | 2020 | (0-0-600)<br>0-389             | (0-1-20)<br>0-853           | (0-0-300)<br>0-105             | (0-0-700)<br>0-189          |
| Caribbean             | 30 to 34 | 2020 | (0-100-0-700)<br>0-481         | (0-100-1-60)<br>1-16        | (0-0-400)<br>0-263             | (0-1-00)<br>0-541           |
| Caribbean             | 35 to 39 | 2020 | (0-300-0-800)<br>0-570         | (0-500-2-00)<br>1-53        | (0-0-600)<br>0-422             | (0-1-20)<br>1-01            |
| Caribbean             | 40 to 44 | 2020 | (0-400-0-800)<br>0-643         | (0-800-2-40)<br>1-92        | (0-100-0-800)<br>0-541         | (0-200-1-90)<br>1-45        |
| Caribbean             | 45 to 49 | 2020 | (0-400-0-902)<br>0-704         | (1-10-3-00)<br>2-29         | (0-300-1-00)<br>0-637          | (0-600-2-40)<br>1-89        |
| Caribbean             | 50 to 54 | 2020 | (0-500-1-00)<br>0-750          | (1-40-3-40)<br>2-65         | (0-400-1-00)<br>0-697          | (0-900-3-00)<br>2-26        |
| Caribbean             | 55 to 59 | 2020 | (0-500-1-00)<br>0-786          | (1-60-3-90)<br>3-19         | (0-500-1-00)<br>0-733          | (1-10-3-70)<br>2-74         |
| Caribbean             | 60 to 64 | 2020 | (0-600-1-00)<br>0-798          | (1-90-4-70)<br>3-52         | (0-500-1-00)<br>0-770          | (1-30-4-30)<br>3-21         |
| Caribbean             | 65 to 69 | 2020 | (0-600-1-00)<br>0-774          | (2-10-5-10)<br>3-83         | (0-500-1-00)<br>0-774          | (1-60-5-00)<br>3-62         |
| Caribbean             | 70 to 74 | 2020 | (0-600-1-00)<br>0-764          | (2-10-5-40)<br>4-10         | (0-600-1-00)<br>0-778          | (1-80-5-40)<br>3-94         |
| Caribbean             | 75 to 79 | 2020 | (0-600-1-00)<br>0-775          | (2-20-5-70)<br>4-52         | (0-600-1-50)<br>0-806          | (1-90-5-70)<br>4-44         |
| Caribbean             | 80 plus  | 2020 | (0-600-1-51)<br>0-0274         | (2-00-6-20)<br>0-0465       | (0-600-2-00)<br>0-0105         | (1-90-6-20)<br>0-0143       |
| Central Latin America | 15 to 19 | 1990 | (0-0-202)<br>0-0707            | (0-0-400)<br>0-120          | (0-0)<br>0-0185                | (0-0)<br>0-0241             |
| Central Latin America | 20 to 24 | 1990 | (0-0-300)<br>0-157             | (0-0-602)<br>0-289          | (0-0-100)<br>0-0224            | (0-0-200)<br>0-0311         |
| Central Latin America | 25 to 29 | 1990 | (0-0-400)<br>0-269             | (0-1-00)<br>0-535           | (0-0-300)<br>0-0347            | (0-0-502)<br>0-0562         |
| Central Latin America | 30 to 34 | 1990 | (0-0-500)<br>0-364             | (0-1-10)<br>0-786           | (0-0-400)<br>0-0907            | (0-0-902)<br>0-156          |
| Central Latin America | 35 to 39 | 1990 | (0-100-0-600)<br>0-477         | (0-100-1-40)<br>1-11        | (0-0-600)<br>0-229             | (0-1-00)<br>0-438           |
| Central Latin America | 40 to 44 | 1990 | (0-300-0-800)<br>0-587         | (0-500-2-00)<br>1-46        | (0-0-800)<br>0-385             | (0-1-20)<br>0-769           |
| Central Latin America | 45 to 49 | 1990 | (0-400-0-900)<br>0-682         | (0-800-2-30)<br>1-85        | (0-1-00)<br>0-523              | (0-1-50)<br>1-14            |
| Central Latin America | 50 to 54 | 1990 | (0-400-1-00)<br>0-749          | (1-10-2-80)<br>2-21         | (0-200-1-00)<br>0-616          | (0-300-2-10)<br>1-49        |
| Central Latin America | 55 to 59 | 1990 | (0-500-1-00)<br>0-781          | (1-30-3-30)<br>2-66         | (0-300-1-00)<br>0-685          | (0-600-2-50)<br>1-94        |
| Central Latin America | 60 to 64 | 1990 | (0-600-1-00)<br>0-800          | (1-50-4-00)<br>3-03         | (0-400-1-00)<br>0-731          | (0-998-3-30)<br>2-35        |
| Central Latin America | 65 to 69 | 1990 | (0-600-1-00)                   | (1-70-4-60)                 | (0-500-1-00)                   | (1-10-3-90)                 |

|                       |          |      |                        |                       |                       |                      |
|-----------------------|----------|------|------------------------|-----------------------|-----------------------|----------------------|
| Central Latin America | 70 to 74 | 1990 | 0-789<br>(0-600-1-00)  | 3-50<br>(1-90-5-20)   | 0-741<br>(0-500-1-00) | 2-85<br>(1-30-4-70)  |
| Central Latin America | 75 to 79 | 1990 | 0-788<br>(0-600-1-00)  | 3-85<br>(2-00-5-60)   | 0-754<br>(0-500-1-50) | 3-32<br>(1-50-5-40)  |
| Central Latin America | 80 plus  | 1990 | 0-807<br>(0-600-2-00)  | 4-53<br>(2-00-6-30)   | 0-771<br>(0-500-1-90) | 3-95<br>(1-60-6-00)  |
| Central Latin America | 15 to 19 | 2000 | 0-0161<br>(0-0-200)    | 0-0278<br>(0-0-400)   | 0-0210<br>(0-0-200)   | 0-0265<br>(0-0-300)  |
| Central Latin America | 20 to 24 | 2000 | 0-0493<br>(0-0-300)    | 0-0850<br>(0-0-700)   | 0-0249<br>(0-0-400)   | 0-0319<br>(0-1-00)   |
| Central Latin America | 25 to 29 | 2000 | 0-127<br>(0-0-402)     | 0-224<br>(0-1-00)     | 0-0277<br>(0-0-400)   | 0-0390<br>(0-1-00)   |
| Central Latin America | 30 to 34 | 2000 | 0-242<br>(0-0-600)     | 0-464<br>(0-1-10)     | 0-0422<br>(0-0-400)   | 0-0676<br>(0-1-00)   |
| Central Latin America | 35 to 39 | 2000 | 0-361<br>(0-0-700)     | 0-739<br>(0-1-30)     | 0-101<br>(0-0-800)    | 0-173<br>(0-1-10)    |
| Central Latin America | 40 to 44 | 2000 | 0-499<br>(0-300-0-800) | 1-10<br>(0-400-1-70)  | 0-254<br>(0-1-00)     | 0-474<br>(0-1-20)    |
| Central Latin America | 45 to 49 | 2000 | 0-621<br>(0-400-0-900) | 1-48<br>(0-900-2-20)  | 0-429<br>(0-1-00)     | 0-840<br>(0-1-60)    |
| Central Latin America | 50 to 54 | 2000 | 0-715<br>(0-500-1-00)  | 1-87<br>(1-20-2-70)   | 0-568<br>(0-200-1-00) | 1-21<br>(0-398-2-10) |
| Central Latin America | 55 to 59 | 2000 | 0-781<br>(0-500-1-00)  | 2-23<br>(1-30-3-20)   | 0-666<br>(0-300-1-00) | 1-57<br>(0-700-2-50) |
| Central Latin America | 60 to 64 | 2000 | 0-818<br>(0-600-1-00)  | 2-68<br>(1-60-3-80)   | 0-739<br>(0-400-1-00) | 2-02<br>(1-00-3-20)  |
| Central Latin America | 65 to 69 | 2000 | 0-835<br>(0-600-1-00)  | 3-04<br>(1-80-4-30)   | 0-784<br>(0-500-1-00) | 2-49<br>(1-20-4-00)  |
| Central Latin America | 70 to 74 | 2000 | 0-824<br>(0-600-1-00)  | 3-48<br>(2-00-5-00)   | 0-790<br>(0-500-1-00) | 2-99<br>(1-40-4-70)  |
| Central Latin America | 75 to 79 | 2000 | 0-820<br>(0-600-1-00)  | 3-85<br>(2-10-5-40)   | 0-794<br>(0-600-1-00) | 3-43<br>(1-70-5-20)  |
| Central Latin America | 80 plus  | 2000 | 0-852<br>(0-600-2-00)  | 4-66<br>(2-20-6-30)   | 0-832<br>(0-600-2-00) | 4-24<br>(1-80-6-10)  |
| Central Latin America | 15 to 19 | 2010 | 0-0138<br>(0-0-200)    | 0-0238<br>(0-0-400)   | 0-0202<br>(0-0-200)   | 0-0254<br>(0-0-300)  |
| Central Latin America | 20 to 24 | 2010 | 0-0447<br>(0-0-400)    | 0-0768<br>(0-0-700)   | 0-0246<br>(0-0-400)   | 0-0323<br>(0-0-805)  |
| Central Latin America | 25 to 29 | 2010 | 0-128<br>(0-0-500)     | 0-225<br>(0-1-00)     | 0-0321<br>(0-0-600)   | 0-0445<br>(0-1-00)   |
| Central Latin America | 30 to 34 | 2010 | 0-265<br>(0-0-600)     | 0-502<br>(0-1-10)     | 0-0495<br>(0-0-600)   | 0-0800<br>(0-1-00)   |
| Central Latin America | 35 to 39 | 2010 | 0-409<br>(0-0-700)     | 0-814<br>(0-1-30)     | 0-118<br>(0-0-800)    | 0-203<br>(0-1-10)    |
| Central Latin America | 40 to 44 | 2010 | 0-555<br>(0-300-0-800) | 1-18<br>(0-500-1-90)  | 0-278<br>(0-0-900)    | 0-521<br>(0-1-30)    |
| Central Latin America | 45 to 49 | 2010 | 0-669<br>(0-400-0-900) | 1-58<br>(0-900-2-40)  | 0-473<br>(0-1-00)     | 0-931<br>(0-1-70)    |
| Central Latin America | 50 to 54 | 2010 | 0-748<br>(0-500-1-00)  | 1-96<br>(1-20-2-80)   | 0-623<br>(0-300-1-00) | 1-34<br>(0-500-2-20) |
| Central Latin America | 55 to 59 | 2010 | 0-797<br>(0-600-1-00)  | 2-27<br>(1-40-3-20)   | 0-719<br>(0-400-1-00) | 1-73<br>(0-900-2-80) |
| Central Latin America | 60 to 64 | 2010 | 0-831<br>(0-600-1-00)  | 2-65<br>(1-60-3-70)   | 0-781<br>(0-500-1-00) | 2-18<br>(1-10-3-40)  |
| Central Latin America | 65 to 69 | 2010 | 0-847<br>(0-600-1-00)  | 2-95<br>(1-80-4-20)   | 0-824<br>(0-500-1-00) | 2-63<br>(1-30-4-10)  |
| Central Latin America | 70 to 74 | 2010 | 0-840<br>(0-600-1-00)  | 3-39<br>(2-00-4-90)   | 0-832<br>(0-600-1-00) | 3-11<br>(1-50-4-80)  |
| Central Latin America | 75 to 79 | 2010 | 0-841<br>(0-600-1-00)  | 3-80<br>(2-10-5-40)   | 0-842<br>(0-600-1-21) | 3-58<br>(1-70-5-30)  |
| Central Latin America | 80 plus  | 2010 | 0-904<br>(0-600-2-00)  | 4-79<br>(2-20-6-40)   | 0-909<br>(0-600-2-00) | 4-49<br>(1-90-6-20)  |
| Central Latin America | 15 to 19 | 2020 | 0-0208<br>(0-0-300)    | 0-0352<br>(0-0-500)   | 0-0195<br>(0-0-200)   | 0-0249<br>(0-0-300)  |
| Central Latin America | 20 to 24 | 2020 | 0-0664<br>(0-0-400)    | 0-117<br>(0-0-900)    | 0-0267<br>(0-0-400)   | 0-0339<br>(0-1-00)   |
| Central Latin America | 25 to 29 | 2020 | 0-180<br>(0-0-600)     | 0-325<br>(0-1-10)     | 0-0352<br>(0-0-502)   | 0-0501<br>(0-1-00)   |
| Central Latin America | 30 to 34 | 2020 | 0-330<br>(0-0-700)     | 0-635<br>(0-1-20)     | 0-0638<br>(0-0-700)   | 0-105<br>(0-1-00)    |
| Central Latin America | 35 to 39 | 2020 | 0-470<br>(0-100-0-800) | 0-935<br>(0-200-1-50) | 0-160<br>(0-0-802)    | 0-283<br>(0-1-10)    |
| Central Latin America | 40 to 44 | 2020 | 0-610<br>(0-300-0-900) | 1-31<br>(0-700-2-10)  | 0-341<br>(0-1-00)     | 0-648<br>(0-1-30)    |
| Central Latin America | 45 to 49 | 2020 | 0-705<br>(0-400-0-900) | 1-69<br>(1-00-2-50)   | 0-531<br>(0-1-00)     | 1-05<br>(0-2-00)     |
| Central Latin America | 50 to 54 | 2020 | 0-770<br>(0-500-1-00)  | 2-04<br>(1-20-2-90)   | 0-674<br>(0-300-1-00) | 1-49<br>(0-600-2-40) |
| Central Latin America | 55 to 59 | 2020 | 0-814<br>(0-600-1-00)  | 2-35<br>(1-40-3-30)   | 0-768<br>(0-400-1-00) | 1-92<br>(1-00-3-00)  |
| Central Latin America | 60 to 64 | 2020 | 0-841<br>(0-600-1-00)  | 2-70<br>(1-60-3-70)   | 0-825<br>(0-500-1-00) | 2-42<br>(1-20-3-70)  |

|                        |          |      |                         |                        |                         |                        |
|------------------------|----------|------|-------------------------|------------------------|-------------------------|------------------------|
| Central Latin America  | 65 to 69 | 2020 | 0-863<br>(0-700-1-00)   | 3-01<br>(1-80-4-20)    | 0-864<br>(0-600-1-00)   | 2-93<br>(1-50-4-50)    |
| Central Latin America  | 70 to 74 | 2020 | 0-857<br>(0-600-1-00)   | 3-44<br>(2-10-4-90)    | 0-870<br>(0-600-1-00)   | 3-42<br>(1-70-5-10)    |
| Central Latin America  | 75 to 79 | 2020 | 0-862<br>(0-600-1-00)   | 3-89<br>(2-30-5-40)    | 0-888<br>(0-600-1-80)   | 3-85<br>(1-90-5-50)    |
| Central Latin America  | 80 plus  | 2020 | 0-953<br>(0-600-2-00)   | 4-92<br>(2-30-6-60)    | 0-983<br>(0-600-2-00)   | 4-75<br>(2-10-6-40)    |
| Tropical Latin America | 15 to 19 | 1990 | 0-0210<br>(0-0-200)     | 0-0358<br>(0-0-400)    | 0-0131<br>(0-0)         | 0-0163<br>(0-0)        |
| Tropical Latin America | 20 to 24 | 1990 | 0-0651<br>(0-0-300)     | 0-115<br>(0-0-700)     | 0-0153<br>(0-0-100)     | 0-0209<br>(0-0-102)    |
| Tropical Latin America | 25 to 29 | 1990 | 0-200<br>(0-0-400)      | 0-383<br>(0-1-00)      | 0-0211<br>(0-0-202)     | 0-0331<br>(0-0-402)    |
| Tropical Latin America | 30 to 34 | 1990 | 0-312<br>(0-0-500)      | 0-681<br>(0-1-20)      | 0-0752<br>(0-0-400)     | 0-134<br>(0-1-00)      |
| Tropical Latin America | 35 to 39 | 1990 | 0-387<br>(0-200-0-500)  | 0-991<br>(0-300-1-70)  | 0-209<br>(0-0-500)      | 0-417<br>(0-1-10)      |
| Tropical Latin America | 40 to 44 | 1990 | 0-452<br>(0-300-0-600)  | 1-36<br>(0-600-2-10)   | 0-331<br>(0-0-502)      | 0-762<br>(0-1-40)      |
| Tropical Latin America | 45 to 49 | 1990 | 0-524<br>(0-400-0-800)  | 1-84<br>(1-00-2-80)    | 0-422<br>(0-200-0-700)  | 1-15<br>(0-400-2-00)   |
| Tropical Latin America | 50 to 54 | 1990 | 0-586<br>(0-500-0-900)  | 2-20<br>(1-30-3-30)    | 0-487<br>(0-300-0-900)  | 1-58<br>(0-700-2-60)   |
| Tropical Latin America | 55 to 59 | 1990 | 0-641<br>(0-500-1-00)   | 2-61<br>(1-50-4-10)    | 0-541<br>(0-400-1-00)   | 2-02<br>(1-00-3-40)    |
| Tropical Latin America | 60 to 64 | 1990 | 0-679<br>(0-500-1-00)   | 3-20<br>(1-80-5-00)    | 0-597<br>(0-500-1-00)   | 2-59<br>(1-30-4-30)    |
| Tropical Latin America | 65 to 69 | 1990 | 0-700<br>(0-500-1-00)   | 3-55<br>(2-00-5-30)    | 0-627<br>(0-500-1-00)   | 3-06<br>(1-50-5-00)    |
| Tropical Latin America | 70 to 74 | 1990 | 0-693<br>(0-500-1-00)   | 3-91<br>(2-10-5-60)    | 0-649<br>(0-500-1-00)   | 3-50<br>(1-70-5-40)    |
| Tropical Latin America | 75 to 79 | 1990 | 0-692<br>(0-500-1-00)   | 4-11<br>(2-20-5-80)    | 0-659<br>(0-500-1-50)   | 3-80<br>(1-90-5-70)    |
| Tropical Latin America | 80 plus  | 1990 | 0-705<br>(0-500-1-50)   | 4-45<br>(2-10-6-20)    | 0-685<br>(0-500-1-70)   | 4-20<br>(1-90-6-10)    |
| Tropical Latin America | 15 to 19 | 2000 | 0-0149<br>(0-0-200)     | 0-0255<br>(0-0-300)    | 0-0228<br>(0-0-200)     | 0-0278<br>(0-0-302)    |
| Tropical Latin America | 20 to 24 | 2000 | 0-0379<br>(0-0-300)     | 0-0665<br>(0-0-600)    | 0-0245<br>(0-0-302)     | 0-0301<br>(0-0-707)    |
| Tropical Latin America | 25 to 29 | 2000 | 0-118<br>(0-0-400)      | 0-212<br>(0-0-800)     | 0-0235<br>(0-0-300)     | 0-0304<br>(0-0-600)    |
| Tropical Latin America | 30 to 34 | 2000 | 0-258<br>(0-0-400)      | 0-518<br>(0-1-10)      | 0-0395<br>(0-0-300)     | 0-0647<br>(0-0-702)    |
| Tropical Latin America | 35 to 39 | 2000 | 0-355<br>(0-0975-0-500) | 0-824<br>(0-0975-1-40) | 0-134<br>(0-0-402)      | 0-245<br>(0-1-00)      |
| Tropical Latin America | 40 to 44 | 2000 | 0-444<br>(0-300-0-700)  | 1-24<br>(0-500-2-00)   | 0-286<br>(0-0-502)      | 0-607<br>(0-1-30)      |
| Tropical Latin America | 45 to 49 | 2000 | 0-530<br>(0-400-0-800)  | 1-68<br>(0-900-2-50)   | 0-397<br>(0-198-0-700)  | 0-984<br>(0-200-1-80)  |
| Tropical Latin America | 50 to 54 | 2000 | 0-603<br>(0-400-0-900)  | 2-05<br>(1-10-3-10)    | 0-477<br>(0-300-1-00)   | 1-38<br>(0-600-2-30)   |
| Tropical Latin America | 55 to 59 | 2000 | 0-664<br>(0-500-1-00)   | 2-44<br>(1-40-3-80)    | 0-537<br>(0-400-1-00)   | 1-79<br>(0-900-3-00)   |
| Tropical Latin America | 60 to 64 | 2000 | 0-697<br>(0-500-1-00)   | 2-96<br>(1-70-4-50)    | 0-594<br>(0-400-1-00)   | 2-30<br>(1-20-3-80)    |
| Tropical Latin America | 65 to 69 | 2000 | 0-716<br>(0-500-1-00)   | 3-26<br>(1-90-4-90)    | 0-625<br>(0-500-1-00)   | 2-75<br>(1-40-4-40)    |
| Tropical Latin America | 70 to 74 | 2000 | 0-699<br>(0-500-1-00)   | 3-56<br>(2-00-5-20)    | 0-646<br>(0-500-1-00)   | 3-16<br>(1-60-4-90)    |
| Tropical Latin America | 75 to 79 | 2000 | 0-694<br>(0-500-1-00)   | 3-71<br>(2-00-5-30)    | 0-656<br>(0-500-1-00)   | 3-47<br>(1-80-5-30)    |
| Tropical Latin America | 80 plus  | 2000 | 0-687<br>(0-500-1-00)   | 3-89<br>(1-90-5-60)    | 0-665<br>(0-500-1-00)   | 3-69<br>(1-80-5-50)    |
| Tropical Latin America | 15 to 19 | 2010 | 0-0126<br>(0-0-200)     | 0-0220<br>(0-0-300)    | 0-0266<br>(0-0-415)     | 0-0319<br>(0-1-00)     |
| Tropical Latin America | 20 to 24 | 2010 | 0-0274<br>(0-0-300)     | 0-0480<br>(0-0-500)    | 0-0244<br>(0-0-300)     | 0-0287<br>(0-0-505)    |
| Tropical Latin America | 25 to 29 | 2010 | 0-0830<br>(0-0-400)     | 0-147<br>(0-0-800)     | 0-0226<br>(0-0-300)     | 0-0302<br>(0-0-700)    |
| Tropical Latin America | 30 to 34 | 2010 | 0-216<br>(0-0-500)      | 0-416<br>(0-1-00)      | 0-0334<br>(0-0-300)     | 0-0526<br>(0-0-602)    |
| Tropical Latin America | 35 to 39 | 2010 | 0-338<br>(0-0-600)      | 0-738<br>(0-1-30)      | 0-104<br>(0-0-402)      | 0-188<br>(0-1-00)      |
| Tropical Latin America | 40 to 44 | 2010 | 0-449<br>(0-200-0-800)  | 1-13<br>(0-400-1-80)   | 0-252<br>(0-0-600)      | 0-517<br>(0-1-20)      |
| Tropical Latin America | 45 to 49 | 2010 | 0-546<br>(0-400-0-900)  | 1-57<br>(0-800-2-40)   | 0-381<br>(0-0975-0-700) | 0-887<br>(0-0975-1-60) |
| Tropical Latin America | 50 to 54 | 2010 | 0-629<br>(0-400-0-900)  | 1-96<br>(1-10-3-00)    | 0-479<br>(0-300-1-00)   | 1-27<br>(0-500-2-10)   |
| Tropical Latin America | 55 to 59 | 2010 | 0-690<br>(0-500-1-00)   | 2-31<br>(1-30-3-50)    | 0-553<br>(0-400-1-00)   | 1-66<br>(0-800-2-70)   |

|                              |          |      |                        |                      |                        |                      |
|------------------------------|----------|------|------------------------|----------------------|------------------------|----------------------|
| Tropical Latin America       | 60 to 64 | 2010 | 0-719<br>(0-500-100)   | 2-75<br>(1-60-4-10)  | 0-614<br>(0-400-1-00)  | 2-12<br>(1-10-3-40)  |
| Tropical Latin America       | 65 to 69 | 2010 | 0-737<br>(0-500-100)   | 3-07<br>(1-80-4-50)  | 0-652<br>(0-500-1-00)  | 2-58<br>(1-30-4-10)  |
| Tropical Latin America       | 70 to 74 | 2010 | 0-712<br>(0-500-100)   | 3-34<br>(1-90-4-90)  | 0-662<br>(0-500-1-00)  | 2-99<br>(1-50-4-60)  |
| Tropical Latin America       | 75 to 79 | 2010 | 0-703<br>(0-500-100)   | 3-48<br>(2-00-5-00)  | 0-667<br>(0-500-1-00)  | 3-32<br>(1-70-5-00)  |
| Tropical Latin America       | 80 plus  | 2010 | 0-682<br>(0-500-100)   | 3-57<br>(1-90-5-20)  | 0-675<br>(0-500-1-00)  | 3-51<br>(1-80-5-20)  |
| Tropical Latin America       | 15 to 19 | 2020 | 0-0168<br>(0-0-200)    | 0-0284<br>(0-0-400)  | 0-0352<br>(0-1-00)     | 0-0424<br>(0-1-00)   |
| Tropical Latin America       | 20 to 24 | 2020 | 0-0371<br>(0-0-300)    | 0-0641<br>(0-0-602)  | 0-0306<br>(0-1-00)     | 0-0387<br>(0-1-00)   |
| Tropical Latin America       | 25 to 29 | 2020 | 0-0960<br>(0-0-400)    | 0-170<br>(0-0-900)   | 0-0266<br>(0-0-400)    | 0-0352<br>(0-0-802)  |
| Tropical Latin America       | 30 to 34 | 2020 | 0-227<br>(0-0-500)     | 0-431<br>(0-1-10)    | 0-0380<br>(0-0-400)    | 0-0617<br>(0-1-00)   |
| Tropical Latin America       | 35 to 39 | 2020 | 0-352<br>(0-0-600)     | 0-761<br>(0-1-30)    | 0-103<br>(0-0-402)     | 0-188<br>(0-1-00)    |
| Tropical Latin America       | 40 to 44 | 2020 | 0-469<br>(0-300-0-800) | 1-12<br>(0-400-1-70) | 0-250<br>(0-0-600)     | 0-512<br>(0-1-20)    |
| Tropical Latin America       | 45 to 49 | 2020 | 0-568<br>(0-400-0-900) | 1-55<br>(0-898-2-30) | 0-382<br>(0-0-700)     | 0-882<br>(0-1-60)    |
| Tropical Latin America       | 50 to 54 | 2020 | 0-642<br>(0-400-0-900) | 1-89<br>(1-10-2-80)  | 0-483<br>(0-300-0-900) | 1-25<br>(0-500-2-10) |
| Tropical Latin America       | 55 to 59 | 2020 | 0-709<br>(0-500-1-00)  | 2-28<br>(1-30-3-40)  | 0-563<br>(0-400-1-00)  | 1-63<br>(0-800-2-60) |
| Tropical Latin America       | 60 to 64 | 2020 | 0-737<br>(0-500-1-00)  | 2-75<br>(1-60-4-10)  | 0-628<br>(0-400-1-00)  | 2-12<br>(1-10-3-40)  |
| Tropical Latin America       | 65 to 69 | 2020 | 0-755<br>(0-500-1-00)  | 3-05<br>(1-80-4-40)  | 0-669<br>(0-500-1-00)  | 2-57<br>(1-30-4-10)  |
| Tropical Latin America       | 70 to 74 | 2020 | 0-729<br>(0-600-1-00)  | 3-30<br>(1-90-4-70)  | 0-681<br>(0-500-1-00)  | 2-98<br>(1-50-4-50)  |
| Tropical Latin America       | 75 to 79 | 2020 | 0-714<br>(0-600-1-00)  | 3-44<br>(2-00-4-90)  | 0-683<br>(0-500-1-00)  | 3-30<br>(1-80-4-90)  |
| Tropical Latin America       | 80 plus  | 2020 | 0-686<br>(0-500-1-00)  | 3-44<br>(1-80-5-10)  | 0-682<br>(0-500-1-00)  | 3-49<br>(1-80-5-10)  |
| North Africa and Middle East | 15 to 19 | 1990 | 0-250<br>(0-0-400)     | 0-505<br>(0-1-10)    | 0-0583<br>(0-0-300)    | 0-108<br>(0-0-700)   |
| North Africa and Middle East | 20 to 24 | 1990 | 0-265<br>(0-0-400)     | 0-543<br>(0-1-20)    | 0-0534<br>(0-0-300)    | 0-0972<br>(0-0-700)  |
| North Africa and Middle East | 25 to 29 | 1990 | 0-312<br>(0-0-500)     | 0-699<br>(0-1-60)    | 0-150<br>(0-0-400)     | 0-292<br>(0-1-10)    |
| North Africa and Middle East | 30 to 34 | 1990 | 0-381<br>(0-200-0-500) | 1-04<br>(0-300-2-40) | 0-254<br>(0-0-500)     | 0-562<br>(0-1-50)    |
| North Africa and Middle East | 35 to 39 | 1990 | 0-425<br>(0-300-0-600) | 1-32<br>(0-500-2-80) | 0-352<br>(0-0-600)     | 0-994<br>(0-2-40)    |
| North Africa and Middle East | 40 to 44 | 1990 | 0-482<br>(0-300-0-802) | 1-74<br>(0-700-3-30) | 0-473<br>(0-200-1-00)  | 1-80<br>(0-400-4-00) |
| North Africa and Middle East | 45 to 49 | 1990 | 0-573<br>(0-400-1-00)  | 2-39<br>(1-00-4-50)  | 0-627<br>(0-300-1-90)  | 2-65<br>(0-700-5-10) |
| North Africa and Middle East | 50 to 54 | 1990 | 0-647<br>(0-400-1-00)  | 2-69<br>(1-20-4-80)  | 0-773<br>(0-400-2-00)  | 3-24<br>(1-00-5-50)  |
| North Africa and Middle East | 55 to 59 | 1990 | 0-707<br>(0-500-1-50)  | 3-06<br>(1-30-5-10)  | 0-863<br>(0-400-2-00)  | 3-76<br>(1-20-6-00)  |
| North Africa and Middle East | 60 to 64 | 1990 | 0-755<br>(0-500-1-50)  | 3-50<br>(1-50-5-60)  | 0-841<br>(0-500-2-00)  | 3-83<br>(1-30-6-00)  |
| North Africa and Middle East | 65 to 69 | 1990 | 0-784<br>(0-500-1-90)  | 3-73<br>(1-60-5-90)  | 0-857<br>(0-500-2-00)  | 3-99<br>(1-40-6-10)  |
| North Africa and Middle East | 70 to 74 | 1990 | 0-762<br>(0-500-1-90)  | 3-65<br>(1-50-5-80)  | 0-796<br>(0-500-2-00)  | 3-88<br>(1-50-6-00)  |
| North Africa and Middle East | 75 to 79 | 1990 | 0-766<br>(0-500-2-00)  | 3-75<br>(1-60-5-90)  | 0-780<br>(0-500-2-00)  | 3-95<br>(1-60-6-10)  |
| North Africa and Middle East | 80 plus  | 1990 | 0-768<br>(0-500-2-00)  | 4-00<br>(1-60-6-20)  | 0-783<br>(0-500-2-00)  | 4-04<br>(1-60-6-10)  |
| North Africa and Middle East | 15 to 19 | 2000 | 0-241<br>(0-0-400)     | 0-481<br>(0-1-10)    | 0-0570<br>(0-0-300)    | 0-104<br>(0-0-700)   |
| North Africa and Middle East | 20 to 24 | 2000 | 0-259<br>(0-0-400)     | 0-527<br>(0-1-10)    | 0-0487<br>(0-0-300)    | 0-0875<br>(0-0-602)  |
| North Africa and Middle East | 25 to 29 | 2000 | 0-303<br>(0-0-500)     | 0-667<br>(0-1-50)    | 0-129<br>(0-0-400)     | 0-246<br>(0-1-00)    |
| North Africa and Middle East | 30 to 34 | 2000 | 0-383<br>(0-200-0-500) | 1-04<br>(0-300-2-50) | 0-245<br>(0-0-500)     | 0-533<br>(0-1-40)    |
| North Africa and Middle East | 35 to 39 | 2000 | 0-428<br>(0-300-0-600) | 1-32<br>(0-500-2-60) | 0-352<br>(0-0-600)     | 0-999<br>(0-2-40)    |
| North Africa and Middle East | 40 to 44 | 2000 | 0-491<br>(0-400-0-702) | 1-82<br>(0-700-3-30) | 0-479<br>(0-200-1-00)  | 1-88<br>(0-400-4-10) |
| North Africa and Middle East | 45 to 49 | 2000 | 0-583<br>(0-400-1-00)  | 2-49<br>(1-00-4-60)  | 0-648<br>(0-300-2-00)  | 2-77<br>(0-700-5-10) |
| North Africa and Middle East | 50 to 54 | 2000 | 0-668<br>(0-500-1-00)  | 2-86<br>(1-20-4-90)  | 0-795<br>(0-400-2-00)  | 3-32<br>(1-00-5-50)  |

|                              |          |      |               |              |              |              |
|------------------------------|----------|------|---------------|--------------|--------------|--------------|
|                              |          |      | 0-729         | 3-23         | 0-877        | 3-80         |
| North Africa and Middle East | 55 to 59 | 2000 | (0-500-1-50)  | (1-40-5-30)  | (0-400-2-00) | (1-20-6-00)  |
|                              |          |      | 0-789         | 3-75         | 0-867        | 3-97         |
| North Africa and Middle East | 60 to 64 | 2000 | (0-500-1-80)  | (1-50-5-80)  | (0-500-2-00) | (1-30-6-10)  |
|                              |          |      | 0-826         | 4-06         | 0-901        | 4-22         |
| North Africa and Middle East | 65 to 69 | 2000 | (0-500-2-00)  | (1-70-6-10)  | (0-500-2-00) | (1-50-6-20)  |
|                              |          |      | 0-799         | 4-06         | 0-841        | 4-14         |
| North Africa and Middle East | 70 to 74 | 2000 | (0-500-2-00)  | (1-70-6-10)  | (0-500-2-00) | (1-50-6-10)  |
|                              |          |      | 0-807         | 4-17         | 0-836        | 4-29         |
| North Africa and Middle East | 75 to 79 | 2000 | (0-500-2-00)  | (1-70-6-20)  | (0-500-2-00) | (1-60-6-30)  |
|                              |          |      | 0-828         | 4-40         | 0-840        | 4-38         |
| North Africa and Middle East | 80 plus  | 2000 | (0-500-2-00)  | (1-70-6-40)  | (0-500-2-00) | (1-60-6-30)  |
|                              |          |      | 0-238         | 0-470        | 0-0697       | 0-127        |
| North Africa and Middle East | 15 to 19 | 2010 | (0-0-400)     | (0-1-10)     | (0-0-300)    | (0-0-702)    |
|                              |          |      | 0-268         | 0-546        | 0-0634       | 0-114        |
| North Africa and Middle East | 20 to 24 | 2010 | (0-0-400)     | (0-1-20)     | (0-0-300)    | (0-0-800)    |
|                              |          |      | 0-318         | 0-702        | 0-145        | 0-280        |
| North Africa and Middle East | 25 to 29 | 2010 | (0-0-500)     | (0-1-40)     | (0-0-400)    | (0-1-100)    |
|                              |          |      | 0-394         | 1-06         | 0-248        | 0-537        |
| North Africa and Middle East | 30 to 34 | 2010 | (0-200-0-600) | (0-300-2-20) | (0-0-500)    | (0-1-40)     |
|                              |          |      | 0-443         | 1-33         | 0-349        | 0-945        |
| North Africa and Middle East | 35 to 39 | 2010 | (0-300-0-600) | (0-500-2-50) | (0-0-600)    | (0-2-30)     |
|                              |          |      | 0-514         | 1-84         | 0-481        | 1-87         |
| North Africa and Middle East | 40 to 44 | 2010 | (0-400-0-800) | (0-800-3-40) | (0-200-1-00) | (0-400-4-00) |
|                              |          |      | 0-614         | 2-55         | 0-670        | 2-81         |
| North Africa and Middle East | 45 to 49 | 2010 | (0-400-1-00)  | (1-10-4-50)  | (0-400-1-90) | (0-800-5-10) |
|                              |          |      | 0-700         | 3-02         | 0-820        | 3-36         |
| North Africa and Middle East | 50 to 54 | 2010 | (0-500-1-00)  | (1-30-5-00)  | (0-400-2-00) | (1-10-5-60)  |
|                              |          |      | 0-771         | 3-47         | 0-893        | 3-75         |
| North Africa and Middle East | 55 to 59 | 2010 | (0-500-1-50)  | (1-50-5-40)  | (0-500-2-00) | (1-30-5-90)  |
|                              |          |      | 0-827         | 3-92         | 0-894        | 3-94         |
| North Africa and Middle East | 60 to 64 | 2010 | (0-500-2-00)  | (1-70-5-90)  | (0-500-2-00) | (1-40-6-00)  |
|                              |          |      | 0-854         | 4-17         | 0-912        | 4-18         |
| North Africa and Middle East | 65 to 69 | 2010 | (0-500-2-00)  | (1-80-6-10)  | (0-500-2-00) | (1-60-6-20)  |
|                              |          |      | 0-833         | 4-20         | 0-856        | 4-14         |
| North Africa and Middle East | 70 to 74 | 2010 | (0-500-2-00)  | (1-70-6-20)  | (0-500-2-00) | (1-60-6-10)  |
|                              |          |      | 0-846         | 4-37         | 0-855        | 4-35         |
| North Africa and Middle East | 75 to 79 | 2010 | (0-500-2-00)  | (1-80-6-30)  | (0-500-2-00) | (1-70-6-30)  |
|                              |          |      | 0-855         | 4-65         | 0-869        | 4-56         |
| North Africa and Middle East | 80 plus  | 2010 | (0-500-2-00)  | (1-80-6-60)  | (0-500-2-00) | (1-70-6-40)  |
|                              |          |      | 0-266         | 0-539        | 0-0749       | 0-138        |
| North Africa and Middle East | 15 to 19 | 2020 | (0-0-400)     | (0-1-10)     | (0-0-400)    | (0-0-800)    |
|                              |          |      | 0-302         | 0-639        | 0-0741       | 0-136        |
| North Africa and Middle East | 20 to 24 | 2020 | (0-0-500)     | (0-1-20)     | (0-0-400)    | (0-0-800)    |
|                              |          |      | 0-349         | 0-792        | 0-168        | 0-327        |
| North Africa and Middle East | 25 to 29 | 2020 | (0-100-0-500) | (0-100-1-50) | (0-0-400)    | (0-1-10)     |
|                              |          |      | 0-416         | 1-12         | 0-266        | 0-589        |
| North Africa and Middle East | 30 to 34 | 2020 | (0-200-0-600) | (0-400-2-20) | (0-0-500)    | (0-1-50)     |
|                              |          |      | 0-465         | 1-40         | 0-372        | 1-04         |
| North Africa and Middle East | 35 to 39 | 2020 | (0-300-0-700) | (0-600-2-60) | (0-0-700)    | (0-2-60)     |
|                              |          |      | 0-540         | 1-94         | 0-508        | 1-99         |
| North Africa and Middle East | 40 to 44 | 2020 | (0-400-0-800) | (0-800-3-50) | (0-298-1-00) | (0-498-4-20) |
|                              |          |      | 0-639         | 2-65         | 0-695        | 2-95         |
| North Africa and Middle East | 45 to 49 | 2020 | (0-400-1-00)  | (1-20-4-60)  | (0-400-1-80) | (0-800-5-20) |
|                              |          |      | 0-723         | 3-15         | 0-852        | 3-58         |
| North Africa and Middle East | 50 to 54 | 2020 | (0-500-1-00)  | (1-40-5-10)  | (0-500-2-00) | (1-20-5-70)  |
|                              |          |      | 0-798         | 3-68         | 0-940        | 4-01         |
| North Africa and Middle East | 55 to 59 | 2020 | (0-500-1-50)  | (1-60-5-70)  | (0-500-2-00) | (1-50-6-00)  |
|                              |          |      | 0-860         | 4-20         | 0-949        | 4-20         |
| North Africa and Middle East | 60 to 64 | 2020 | (0-600-2-00)  | (1-80-6-10)  | (0-500-2-00) | (1-60-6-10)  |
|                              |          |      | 0-892         | 4-43         | 0-957        | 4-40         |
| North Africa and Middle East | 65 to 69 | 2020 | (0-600-2-00)  | (2-00-6-30)  | (0-500-2-00) | (1-70-6-30)  |
|                              |          |      | 0-873         | 4-42         | 0-890        | 4-31         |
| North Africa and Middle East | 70 to 74 | 2020 | (0-600-2-00)  | (1-90-6-30)  | (0-500-2-00) | (1-70-6-20)  |
|                              |          |      | 0-884         | 4-61         | 0-882        | 4-46         |
| North Africa and Middle East | 75 to 79 | 2020 | (0-500-2-00)  | (1-90-6-60)  | (0-500-2-00) | (1-70-6-40)  |
|                              |          |      | 0-897         | 4-93         | 0-907        | 4-71         |
| North Africa and Middle East | 80 plus  | 2020 | (0-500-2-00)  | (1-90-6-80)  | (0-500-2-00) | (1-70-6-60)  |
|                              |          |      | 0-186         | 0-322        | 0-0426       | 0-0617       |
| South Asia                   | 15 to 19 | 1990 | (0-2-40)      | (0-3-50)     | (0-0-100)    | (0-0-100)    |
|                              |          |      | 0-277         | 0-483        | 0-0871       | 0-126        |
| South Asia                   | 20 to 24 | 1990 | (0-2-50)      | (0-4-20)     | (0-1-100)    | (0-1-100)    |
|                              |          |      | 0-384         | 0-724        | 0-168        | 0-292        |
| South Asia                   | 25 to 29 | 1990 | (0-2-60)      | (0-5-80)     | (0-2-10)     | (0-3-00)     |
|                              |          |      | 0-531         | 1-14         | 0-348        | 0-670        |
| South Asia                   | 30 to 34 | 1990 | (0-2-80)      | (0-9-10)     | (0-2-30)     | (0-4-10)     |
|                              |          |      | 0-544         | 1-18         | 0-440        | 0-916        |
| South Asia                   | 35 to 39 | 1990 | (0-2-60)      | (0-7-50)     | (0-2-30)     | (0-5-10)     |
|                              |          |      | 0-613         | 1-50         | 0-544        | 1-26         |
| South Asia                   | 40 to 44 | 1990 | (0-100-2-50)  | (0-200-7-91) | (0-100-2-30) | (0-100-6-10) |
|                              |          |      | 0-610         | 1-60         | 0-608        | 1-56         |
| South Asia                   | 45 to 49 | 1990 | (0-300-2-30)  | (0-400-6-50) | (0-200-2-40) | (0-300-6-50) |

|            |          |      |                       |                       |                       |                      |
|------------|----------|------|-----------------------|-----------------------|-----------------------|----------------------|
| South Asia | 50 to 54 | 1990 | 0-642<br>(0-300-2-30) | 1-78<br>(0-500-7-00)  | 0-640<br>(0-300-2-30) | 1-82<br>(0-500-6-80) |
| South Asia | 55 to 59 | 1990 | 0-665<br>(0-300-2-20) | 2-09<br>(0-700-7-30)  | 0-670<br>(0-300-2-30) | 2-02<br>(0-600-7-20) |
| South Asia | 60 to 64 | 1990 | 0-647<br>(0-400-2-10) | 2-29<br>(0-900-6-60)  | 0-698<br>(0-400-2-30) | 2-28<br>(0-700-7-60) |
| South Asia | 65 to 69 | 1990 | 0-653<br>(0-400-2-00) | 2-44<br>(1-00-6-50)   | 0-691<br>(0-400-2-20) | 2-45<br>(0-800-7-40) |
| South Asia | 70 to 74 | 1990 | 0-654<br>(0-400-2-10) | 2-56<br>(1-00-7-00)   | 0-716<br>(0-400-2-30) | 2-70<br>(0-900-8-00) |
| South Asia | 75 to 79 | 1990 | 0-675<br>(0-400-2-20) | 2-84<br>(1-00-7-30)   | 0-726<br>(0-400-2-30) | 2-88<br>(1-00-8-00)  |
| South Asia | 80 plus  | 1990 | 0-679<br>(0-400-2-30) | 2-86<br>(1-00-7-00)   | 0-745<br>(0-400-2-40) | 3-01<br>(1-00-8-00)  |
| South Asia | 15 to 19 | 2000 | 0-144<br>(0-2-00)     | 0-237<br>(0-2-70)     | 0-0182<br>(0-0-100)   | 0-0262<br>(0-0-100)  |
| South Asia | 20 to 24 | 2000 | 0-217<br>(0-2-20)     | 0-375<br>(0-3-20)     | 0-0518<br>(0-0-300)   | 0-0859<br>(0-0-600)  |
| South Asia | 25 to 29 | 2000 | 0-315<br>(0-2-40)     | 0-589<br>(0-4-10)     | 0-132<br>(0-1-00)     | 0-237<br>(0-2-20)    |
| South Asia | 30 to 34 | 2000 | 0-453<br>(0-2-50)     | 0-947<br>(0-6-10)     | 0-336<br>(0-2-00)     | 0-647<br>(0-3-10)    |
| South Asia | 35 to 39 | 2000 | 0-475<br>(0-2-30)     | 1-01<br>(0-5-40)      | 0-420<br>(0-2-10)     | 0-864<br>(0-4-00)    |
| South Asia | 40 to 44 | 2000 | 0-560<br>(0-200-2-30) | 1-33<br>(0-300-5-90)  | 0-530<br>(0-100-2-20) | 1-19<br>(0-100-4-80) |
| South Asia | 45 to 49 | 2000 | 0-579<br>(0-300-2-10) | 1-54<br>(0-500-5-30)  | 0-594<br>(0-200-2-10) | 1-49<br>(0-400-5-30) |
| South Asia | 50 to 54 | 2000 | 0-605<br>(0-300-2-10) | 1-69<br>(0-600-5-40)  | 0-632<br>(0-300-2-10) | 1-79<br>(0-598-5-80) |
| South Asia | 55 to 59 | 2000 | 0-649<br>(0-400-2-10) | 2-05<br>(0-700-6-00)  | 0-664<br>(0-300-2-10) | 2-03<br>(0-600-6-20) |
| South Asia | 60 to 64 | 2000 | 0-632<br>(0-400-2-00) | 2-27<br>(1-00-5-60)   | 0-678<br>(0-400-2-10) | 2-27<br>(0-800-6-40) |
| South Asia | 65 to 69 | 2000 | 0-635<br>(0-400-2-00) | 2-48<br>(1-10-6-00)   | 0-684<br>(0-400-2-10) | 2-49<br>(0-900-6-50) |
| South Asia | 70 to 74 | 2000 | 0-645<br>(0-400-2-00) | 2-63<br>(1-10-6-20)   | 0-712<br>(0-400-2-20) | 2-74<br>(0-900-7-10) |
| South Asia | 75 to 79 | 2000 | 0-667<br>(0-500-2-00) | 2-93<br>(1-10-6-60)   | 0-727<br>(0-400-2-20) | 3-00<br>(1-00-7-30)  |
| South Asia | 80 plus  | 2000 | 0-666<br>(0-500-2-00) | 2-97<br>(1-20-6-50)   | 0-750<br>(0-400-2-30) | 3-20<br>(1-10-7-30)  |
| South Asia | 15 to 19 | 2010 | 0-107<br>(0-1-00)     | 0-175<br>(0-1-20)     | 0-00830<br>(0-0-100)  | 0-0112<br>(0-0-100)  |
| South Asia | 20 to 24 | 2010 | 0-155<br>(0-1-00)     | 0-267<br>(0-1-50)     | 0-0387<br>(0-0-300)   | 0-0614<br>(0-0-500)  |
| South Asia | 25 to 29 | 2010 | 0-250<br>(0-2-00)     | 0-453<br>(0-2-70)     | 0-0946<br>(0-0-400)   | 0-164<br>(0-1-00)    |
| South Asia | 30 to 34 | 2010 | 0-384<br>(0-2-10)     | 0-787<br>(0-3-70)     | 0-265<br>(0-1-00)     | 0-528<br>(0-2-10)    |
| South Asia | 35 to 39 | 2010 | 0-428<br>(0-2-00)     | 0-936<br>(0-3-40)     | 0-371<br>(0-2-00)     | 0-770<br>(0-2-70)    |
| South Asia | 40 to 44 | 2010 | 0-523<br>(0-200-2-00) | 1-31<br>(0-400-4-10)  | 0-484<br>(0-100-2-00) | 1-14<br>(0-100-3-30) |
| South Asia | 45 to 49 | 2010 | 0-568<br>(0-300-2-00) | 1-60<br>(0-600-4-10)  | 0-565<br>(0-200-2-00) | 1-49<br>(0-400-4-20) |
| South Asia | 50 to 54 | 2010 | 0-605<br>(0-400-2-00) | 1-76<br>(0-700-4-30)  | 0-622<br>(0-300-2-00) | 1-86<br>(0-600-4-80) |
| South Asia | 55 to 59 | 2010 | 0-642<br>(0-400-2-00) | 2-08<br>(0-900-4-80)  | 0-661<br>(0-400-2-00) | 2-11<br>(0-700-5-20) |
| South Asia | 60 to 64 | 2010 | 0-648<br>(0-400-1-90) | 2-44<br>(1-10-5-10)   | 0-682<br>(0-400-2-00) | 2-41<br>(0-900-5-70) |
| South Asia | 65 to 69 | 2010 | 0-655<br>(0-500-1-90) | 2-70<br>(1-20-5-60)   | 0-690<br>(0-400-2-00) | 2-68<br>(1-00-6-00)  |
| South Asia | 70 to 74 | 2010 | 0-661<br>(0-500-1-90) | 2-87<br>(1-20-5-80)   | 0-717<br>(0-400-2-00) | 2-98<br>(1-10-6-40)  |
| South Asia | 75 to 79 | 2010 | 0-687<br>(0-500-2-00) | 3-22<br>(1-30-6-20)   | 0-728<br>(0-500-2-00) | 3-25<br>(1-20-6-50)  |
| South Asia | 80 plus  | 2010 | 0-692<br>(0-500-1-90) | 3-31<br>(1-30-6-10)   | 0-763<br>(0-500-2-20) | 3-57<br>(1-20-6-80)  |
| South Asia | 15 to 19 | 2020 | 0-103<br>(0-1-00)     | 0-171<br>(0-1-10)     | 0-00640<br>(0-0-100)  | 0-00970<br>(0-0-100) |
| South Asia | 20 to 24 | 2020 | 0-148<br>(0-1-00)     | 0-263<br>(0-1-20)     | 0-0427<br>(0-0-300)   | 0-0719<br>(0-0-600)  |
| South Asia | 25 to 29 | 2020 | 0-241<br>(0-1-00)     | 0-451<br>(0-1-50)     | 0-0943<br>(0-0-400)   | 0-171<br>(0-1-00)    |
| South Asia | 30 to 34 | 2020 | 0-362<br>(0-1-00)     | 0-772<br>(0-2-90)     | 0-277<br>(0-0-702)    | 0-584<br>(0-1-70)    |
| South Asia | 35 to 39 | 2020 | 0-416<br>(0-100-1-00) | 0-973<br>(0-100-2-80) | 0-367<br>(0-1-00)     | 0-826<br>(0-2-30)    |
| South Asia | 40 to 44 | 2020 | 0-525<br>(0-300-2-00) | 1-41<br>(0-500-3-70)  | 0-498<br>(0-200-1-90) | 1-22<br>(0-300-3-10) |

|            |          |      |                        |                       |                        |                       |
|------------|----------|------|------------------------|-----------------------|------------------------|-----------------------|
| South Asia | 45 to 49 | 2020 | 0-569<br>(0-400-100)   | 1-70<br>(0-700-3-70)  | 0-584<br>(0-300-2-00)  | 1-61<br>(0-500-3-80)  |
| South Asia | 50 to 54 | 2020 | 0-623<br>(0-400-1-00)  | 2-00<br>(0-900-4-30)  | 0-647<br>(0-400-2-00)  | 2-01<br>(0-700-4-50)  |
| South Asia | 55 to 59 | 2020 | 0-679<br>(0-400-1-90)  | 2-41<br>(1-10-5-00)   | 0-695<br>(0-400-2-00)  | 2-33<br>(0-900-5-10)  |
| South Asia | 60 to 64 | 2020 | 0-678<br>(0-500-1-00)  | 2-81<br>(1-30-5-10)   | 0-711<br>(0-400-2-00)  | 2-69<br>(1-10-5-40)   |
| South Asia | 65 to 69 | 2020 | 0-685<br>(0-500-1-01)  | 3-07<br>(1-40-5-40)   | 0-718<br>(0-500-2-00)  | 3-00<br>(1-20-5-70)   |
| South Asia | 70 to 74 | 2020 | 0-681<br>(0-500-1-50)  | 3-24<br>(1-40-5-70)   | 0-741<br>(0-500-2-00)  | 3-34<br>(1-30-6-10)   |
| South Asia | 75 to 79 | 2020 | 0-718<br>(0-500-1-80)  | 3-64<br>(1-50-6-10)   | 0-765<br>(0-500-2-00)  | 3-65<br>(1-40-6-30)   |
| South Asia | 80 plus  | 2020 | 0-726<br>(0-500-1-50)  | 3-81<br>(1-60-6-20)   | 0-811<br>(0-500-2-10)  | 4-05<br>(1-40-6-70)   |
| East Asia  | 15 to 19 | 1990 | 0-0773<br>(0-0-400)    | 0-134<br>(0-1-00)     | 0-0313<br>(0-0-200)    | 0-0526<br>(0-0-400)   |
| East Asia  | 20 to 24 | 1990 | 0-134<br>(0-0-500)     | 0-244<br>(0-1-10)     | 0-0502<br>(0-0-300)    | 0-0860<br>(0-0-600)   |
| East Asia  | 25 to 29 | 1990 | 0-215<br>(0-0-600)     | 0-416<br>(0-1-30)     | 0-108<br>(0-0-400)     | 0-194<br>(0-0-800)    |
| East Asia  | 30 to 34 | 1990 | 0-254<br>(0-0-500)     | 0-515<br>(0-1-30)     | 0-196<br>(0-0-400)     | 0-375<br>(0-1-00)     |
| East Asia  | 35 to 39 | 1990 | 0-311<br>(0-0-500)     | 0-685<br>(0-1-40)     | 0-262<br>(0-0-400)     | 0-545<br>(0-1-10)     |
| East Asia  | 40 to 44 | 1990 | 0-371<br>(0-100-0-500) | 0-932<br>(0-200-1-70) | 0-326<br>(0-0-500)     | 0-740<br>(0-1-30)     |
| East Asia  | 45 to 49 | 1990 | 0-414<br>(0-300-0-500) | 1-18<br>(0-500-2-00)  | 0-370<br>(0-100-0-500) | 0-902<br>(0-200-1-50) |
| East Asia  | 50 to 54 | 1990 | 0-455<br>(0-400-0-502) | 1-43<br>(0-700-2-10)  | 0-409<br>(0-300-0-500) | 1-12<br>(0-500-1-80)  |
| East Asia  | 55 to 59 | 1990 | 0-481<br>(0-400-0-600) | 1-62<br>(0-900-2-30)  | 0-432<br>(0-300-0-500) | 1-29<br>(0-600-2-00)  |
| East Asia  | 60 to 64 | 1990 | 0-502<br>(0-400-0-600) | 1-83<br>(1-10-2-50)   | 0-463<br>(0-400-0-500) | 1-51<br>(0-800-2-20)  |
| East Asia  | 65 to 69 | 1990 | 0-511<br>(0-400-0-600) | 1-95<br>(1-20-2-60)   | 0-486<br>(0-400-0-600) | 1-72<br>(1-00-2-50)   |
| East Asia  | 70 to 74 | 1990 | 0-515<br>(0-400-0-600) | 2-06<br>(1-30-2-80)   | 0-499<br>(0-400-0-600) | 1-86<br>(1-10-2-70)   |
| East Asia  | 75 to 79 | 1990 | 0-520<br>(0-500-0-600) | 2-20<br>(1-40-3-10)   | 0-506<br>(0-400-0-600) | 2-04<br>(1-30-3-00)   |
| East Asia  | 80 plus  | 1990 | 0-534<br>(0-500-0-707) | 2-58<br>(1-70-4-10)   | 0-522<br>(0-500-0-600) | 2-38<br>(1-50-3-80)   |
| East Asia  | 15 to 19 | 2000 | 0-0680<br>(0-0-300)    | 0-117<br>(0-0-700)    | 0-0259<br>(0-0-200)    | 0-0431<br>(0-0-400)   |
| East Asia  | 20 to 24 | 2000 | 0-141<br>(0-0-400)     | 0-263<br>(0-1-10)     | 0-0439<br>(0-0-300)    | 0-0775<br>(0-0-600)   |
| East Asia  | 25 to 29 | 2000 | 0-221<br>(0-0-500)     | 0-445<br>(0-1-30)     | 0-100<br>(0-0-400)     | 0-182<br>(0-0-900)    |
| East Asia  | 30 to 34 | 2000 | 0-263<br>(0-0-500)     | 0-545<br>(0-1-30)     | 0-189<br>(0-0-400)     | 0-368<br>(0-1-00)     |
| East Asia  | 35 to 39 | 2000 | 0-321<br>(0-0-500)     | 0-710<br>(0-1-30)     | 0-271<br>(0-0-400)     | 0-577<br>(0-1-20)     |
| East Asia  | 40 to 44 | 2000 | 0-380<br>(0-200-0-500) | 0-981<br>(0-300-1-60) | 0-347<br>(0-0-500)     | 0-826<br>(0-1-40)     |
| East Asia  | 45 to 49 | 2000 | 0-425<br>(0-300-0-500) | 1-29<br>(0-600-2-00)  | 0-384<br>(0-200-0-500) | 0-989<br>(0-300-1-60) |
| East Asia  | 50 to 54 | 2000 | 0-463<br>(0-400-0-600) | 1-53<br>(0-800-2-20)  | 0-417<br>(0-300-0-500) | 1-20<br>(0-500-1-90)  |
| East Asia  | 55 to 59 | 2000 | 0-493<br>(0-400-0-600) | 1-70<br>(1-00-2-30)   | 0-440<br>(0-300-0-500) | 1-38<br>(0-700-2-10)  |
| East Asia  | 60 to 64 | 2000 | 0-514<br>(0-400-0-600) | 1-99<br>(1-20-2-60)   | 0-477<br>(0-400-0-600) | 1-65<br>(0-900-2-30)  |
| East Asia  | 65 to 69 | 2000 | 0-521<br>(0-500-0-600) | 2-16<br>(1-40-3-00)   | 0-496<br>(0-400-0-600) | 1-89<br>(1-10-2-60)   |
| East Asia  | 70 to 74 | 2000 | 0-524<br>(0-500-0-600) | 2-33<br>(1-60-3-30)   | 0-503<br>(0-400-0-600) | 2-06<br>(1-30-2-90)   |
| East Asia  | 75 to 79 | 2000 | 0-527<br>(0-500-0-600) | 2-49<br>(1-70-3-70)   | 0-510<br>(0-400-0-600) | 2-26<br>(1-50-3-30)   |
| East Asia  | 80 plus  | 2000 | 0-541<br>(0-500-0-700) | 3-02<br>(1-90-4-90)   | 0-524<br>(0-500-0-600) | 2-74<br>(1-80-4-40)   |
| East Asia  | 15 to 19 | 2010 | 0-0814<br>(0-0-300)    | 0-143<br>(0-0-700)    | 0-0287<br>(0-0-300)    | 0-0501<br>(0-0-500)   |
| East Asia  | 20 to 24 | 2010 | 0-164<br>(0-0-400)     | 0-303<br>(0-1-00)     | 0-0578<br>(0-0-300)    | 0-105<br>(0-0-700)    |
| East Asia  | 25 to 29 | 2010 | 0-247<br>(0-0-500)     | 0-490<br>(0-1-10)     | 0-125<br>(0-0-400)     | 0-241<br>(0-1-00)     |
| East Asia  | 30 to 34 | 2010 | 0-295<br>(0-0-500)     | 0-622<br>(0-1-20)     | 0-230<br>(0-0-400)     | 0-468<br>(0-1-20)     |
| East Asia  | 35 to 39 | 2010 | 0-346<br>(0-100-0-500) | 0-784<br>(0-100-1-40) | 0-302<br>(0-0-500)     | 0-677<br>(0-1-30)     |

|           |          |      |               |              |                |               |
|-----------|----------|------|---------------|--------------|----------------|---------------|
|           |          |      | 0-398         | 1-06         | 0-367          | 0-937         |
| East Asia | 40 to 44 | 2010 | (0-200-0-500) | (0-400-1-70) | (0-100-0-500)  | (0-200-1-70)  |
|           |          |      | 0-445         | 1-42         | 0-408          | 1-16          |
| East Asia | 45 to 49 | 2010 | (0-300-0-600) | (0-700-2-10) | (0-200-0-500)  | (0-400-2-00)  |
|           |          |      | 0-487         | 1-71         | 0-444          | 1-43          |
| East Asia | 50 to 54 | 2010 | (0-400-0-600) | (1-00-2-30)  | (0-300-0-500)  | (0-700-2-20)  |
|           |          |      | 0-512         | 1-94         | 0-466          | 1-61          |
| East Asia | 55 to 59 | 2010 | (0-400-0-600) | (1-20-2-70)  | (0-400-0-600)  | (0-800-2-40)  |
|           |          |      | 0-534         | 2-30         | 0-491          | 1-89          |
| East Asia | 60 to 64 | 2010 | (0-500-0-700) | (1-40-3-30)  | (0-400-0-600)  | (1-10-2-70)   |
|           |          |      | 0-548         | 2-58         | 0-506          | 2-15          |
| East Asia | 65 to 69 | 2010 | (0-500-0-700) | (1-70-3-90)  | (0-400-0-600)  | (1-30-3-10)   |
|           |          |      | 0-559         | 2-93         | 0-518          | 2-45          |
| East Asia | 70 to 74 | 2010 | (0-500-0-700) | (1-90-4-50)  | (0-500-0-600)  | (1-60-3-70)   |
|           |          |      | 0-566         | 3-33         | 0-528          | 2-82          |
| East Asia | 75 to 79 | 2010 | (0-500-0-800) | (1-90-5-10)  | (0-500-0-600)  | (1-80-4-40)   |
|           |          |      | 0-626         | 4-22         | 0-576          | 3-69          |
| East Asia | 80 plus  | 2010 | (0-500-1-50)  | (2-00-6-10)  | (0-500-1-00)   | (1-90-5-60)   |
|           |          |      | 0-112         | 0-195        | 0-0362         | 0-0633        |
| East Asia | 15 to 19 | 2020 | (0-0-400)     | (0-0-702)    | (0-0-300)      | (0-0-500)     |
|           |          |      | 0-212         | 0-403        | 0-0868         | 0-160         |
| East Asia | 20 to 24 | 2020 | (0-0-500)     | (0-1-00)     | (0-0-400)      | (0-0-900)     |
|           |          |      | 0-301         | 0-610        | 0-172          | 0-334         |
| East Asia | 25 to 29 | 2020 | (0-0-500)     | (0-1-20)     | (0-0-400)      | (0-1-10)      |
|           |          |      | 0-344         | 0-741        | 0-282          | 0-614         |
| East Asia | 30 to 34 | 2020 | (0-0-500)     | (0-1-30)     | (0-0-500)      | (0-1-30)      |
|           |          |      | 0-379         | 0-889        | 0-352          | 0-870         |
| East Asia | 35 to 39 | 2020 | (0-198-0-600) | (0-298-1-50) | (0-0975-1-500) | (0-0975-1-60) |
|           |          |      | 0-420         | 1-14         | 0-402          | 1-12          |
| East Asia | 40 to 44 | 2020 | (0-300-0-600) | (0-500-1-80) | (0-200-0-500)  | (0-400-2-00)  |
|           |          |      | 0-468         | 1-46         | 0-430          | 1-27          |
| East Asia | 45 to 49 | 2020 | (0-400-0-600) | (0-800-2-20) | (0-300-0-600)  | (0-600-2-10)  |
|           |          |      | 0-505         | 1-79         | 0-459          | 1-51          |
| East Asia | 50 to 54 | 2020 | (0-400-0-600) | (1-00-2-50)  | (0-400-0-600)  | (0-800-2-30)  |
|           |          |      | 0-530         | 2-05         | 0-481          | 1-72          |
| East Asia | 55 to 59 | 2020 | (0-400-0-700) | (1-20-2-90)  | (0-400-0-600)  | (0-900-2-50)  |
|           |          |      | 0-555         | 2-45         | 0-502          | 2-00          |
| East Asia | 60 to 64 | 2020 | (0-500-0-700) | (1-50-3-60)  | (0-400-0-600)  | (1-10-3-00)   |
|           |          |      | 0-569         | 2-78         | 0-513          | 2-25          |
| East Asia | 65 to 69 | 2020 | (0-500-0-800) | (1-80-4-30)  | (0-400-0-600)  | (1-30-3-30)   |
|           |          |      | 0-579         | 3-14         | 0-525          | 2-56          |
| East Asia | 70 to 74 | 2020 | (0-500-0-802) | (1-90-4-80)  | (0-500-0-600)  | (1-60-3-90)   |
|           |          |      | 0-593         | 3-53         | 0-540          | 2-93          |
| East Asia | 75 to 79 | 2020 | (0-500-1-00)  | (2-00-5-40)  | (0-500-0-602)  | (1-80-4-50)   |
|           |          |      | 0-662         | 4-46         | 0-610          | 3-92          |
| East Asia | 80 plus  | 2020 | (0-500-1-50)  | (2-00-6-40)  | (0-500-1-50)   | (1-90-5-80)   |
|           |          |      | 0-269         | 0-499        | 0-0297         | 0-0429        |
| Oceania   | 15 to 19 | 1990 | (0-2-60)      | (0-6-81)     | (0-0-200)      | (0-0-400)     |
|           |          |      | 0-330         | 0-646        | 0-0620         | 0-0987        |
| Oceania   | 20 to 24 | 1990 | (0-2-50)      | (0-6-91)     | (0-0-300)      | (0-0-600)     |
|           |          |      | 0-419         | 0-952        | 0-230          | 0-442         |
| Oceania   | 25 to 29 | 1990 | (0-2-30)      | (0-4-80)     | (0-1-90)       | (0-2-50)      |
|           |          |      | 0-520         | 1-34         | 0-483          | 1-16          |
| Oceania   | 30 to 34 | 1990 | (0-200-2-30)  | (0-300-6-60) | (0-100-2-30)   | (0-100-5-10)  |
|           |          |      | 0-592         | 1-64         | 0-544          | 1-54          |
| Oceania   | 35 to 39 | 1990 | (0-300-2-20)  | (0-500-6-10) | (0-300-2-00)   | (0-500-4-50)  |
|           |          |      | 0-659         | 2-14         | 0-705          | 2-33          |
| Oceania   | 40 to 44 | 1990 | (0-400-2-10)  | (0-800-6-70) | (0-400-2-10)   | (0-800-6-20)  |
|           |          |      | 0-645         | 2-45         | 0-784          | 2-76          |
| Oceania   | 45 to 49 | 1990 | (0-400-1-00)  | (1-10-5-00)  | (0-400-2-10)   | (1-00-6-50)   |
|           |          |      | 0-690         | 2-66         | 0-821          | 3-23          |
| Oceania   | 50 to 54 | 1990 | (0-500-1-80)  | (1-30-5-40)  | (0-500-2-10)   | (1-20-7-00)   |
|           |          |      | 0-706         | 2-88         | 0-835          | 3-55          |
| Oceania   | 55 to 59 | 1990 | (0-500-1-70)  | (1-40-5-60)  | (0-500-2-00)   | (1-40-6-90)   |
|           |          |      | 0-704         | 3-29         | 0-818          | 3-69          |
| Oceania   | 60 to 64 | 1990 | (0-500-1-90)  | (1-50-6-30)  | (0-500-2-10)   | (1-40-7-40)   |
|           |          |      | 0-692         | 3-38         | 0-810          | 3-62          |
| Oceania   | 65 to 69 | 1990 | (0-500-1-50)  | (1-70-6-20)  | (0-500-2-10)   | (1-40-7-40)   |
|           |          |      | 0-699         | 3-63         | 0-760          | 3-70          |
| Oceania   | 70 to 74 | 1990 | (0-500-1-90)  | (1-60-6-80)  | (0-500-2-10)   | (1-50-7-50)   |
|           |          |      | 0-662         | 3-51         | 0-758          | 3-82          |
| Oceania   | 75 to 79 | 1990 | (0-500-1-80)  | (1-70-6-40)  | (0-500-2-00)   | (1-60-7-40)   |
|           |          |      | 0-664         | 4-07         | 0-747          | 4-00          |
| Oceania   | 80 plus  | 1990 | (0-500-1-50)  | (2-00-6-40)  | (0-500-2-00)   | (1-60-7-40)   |
|           |          |      | 0-258         | 0-484        | 0-0235         | 0-0360        |
| Oceania   | 15 to 19 | 2000 | (0-2-40)      | (0-4-50)     | (0-0-200)      | (0-0-302)     |
|           |          |      | 0-354         | 0-692        | 0-0661         | 0-110         |
| Oceania   | 20 to 24 | 2000 | (0-2-50)      | (0-5-11)     | (0-0-300)      | (0-0-700)     |
|           |          |      | 0-438         | 1-00         | 0-245          | 0-466         |
| Oceania   | 25 to 29 | 2000 | (0-2-30)      | (0-4-30)     | (0-0-502)      | (0-2-10)      |
|           |          |      | 0-530         | 1-41         | 0-484          | 1-17          |
| Oceania   | 30 to 34 | 2000 | (0-200-2-20)  | (0-400-5-80) | (0-100-2-20)   | (0-100-4-60)  |



|                |          |      |                        |                       |                       |                      |
|----------------|----------|------|------------------------|-----------------------|-----------------------|----------------------|
| Oceania        | 35 to 39 | 2000 | 0-596<br>(0-300-2-10)  | 1-72<br>(0-600-5-20)  | 0-567<br>(0-300-2-00) | 1-64<br>(0-500-4-40) |
| Oceania        | 40 to 44 | 2000 | 0-680<br>(0-400-2-10)  | 2-28<br>(0-900-6-00)  | 0-742<br>(0-400-2-10) | 2-49<br>(0-900-6-00) |
| Oceania        | 45 to 49 | 2000 | 0-679<br>(0-500-1-00)  | 2-64<br>(1-30-5-20)   | 0-819<br>(0-400-2-10) | 2-89<br>(1-10-6-30)  |
| Oceania        | 50 to 54 | 2000 | 0-720<br>(0-500-1-00)  | 2-89<br>(1-40-5-40)   | 0-864<br>(0-500-2-10) | 3-47<br>(1-30-6-80)  |
| Oceania        | 55 to 59 | 2000 | 0-739<br>(0-500-1-00)  | 3-15<br>(1-60-5-60)   | 0-875<br>(0-500-2-00) | 3-78<br>(1-60-6-80)  |
| Oceania        | 60 to 64 | 2000 | 0-759<br>(0-500-1-80)  | 3-70<br>(1-80-6-30)   | 0-863<br>(0-500-2-10) | 3-98<br>(1-60-7-20)  |
| Oceania        | 65 to 69 | 2000 | 0-749<br>(0-500-1-50)  | 3-78<br>(2-00-6-20)   | 0-838<br>(0-500-2-10) | 3-94<br>(1-60-7-10)  |
| Oceania        | 70 to 74 | 2000 | 0-722<br>(0-500-1-90)  | 3-91<br>(1-80-6-70)   | 0-793<br>(0-500-2-10) | 3-95<br>(1-60-7-30)  |
| Oceania        | 75 to 79 | 2000 | 0-671<br>(0-500-1-60)  | 3-71<br>(1-80-6-50)   | 0-780<br>(0-500-2-00) | 3-99<br>(1-60-7-20)  |
| Oceania        | 80 plus  | 2000 | 0-673<br>(0-500-1-50)  | 4-14<br>(2-00-6-50)   | 0-770<br>(0-500-2-10) | 4-10<br>(1-60-7-40)  |
| Oceania        | 15 to 19 | 2010 | 0-274<br>(0-2-40)      | 0-514<br>(0-4-40)     | 0-0300<br>(0-0-200)   | 0-0412<br>(0-0-300)  |
| Oceania        | 20 to 24 | 2010 | 0-347<br>(0-2-50)      | 0-668<br>(0-4-90)     | 0-0861<br>(0-0-400)   | 0-134<br>(0-0-702)   |
| Oceania        | 25 to 29 | 2010 | 0-430<br>(0-100-2-20)  | 0-994<br>(0-100-3-80) | 0-252<br>(0-0-602)    | 0-502<br>(0-2-30)    |
| Oceania        | 30 to 34 | 2010 | 0-542<br>(0-300-2-20)  | 1-44<br>(0-400-5-20)  | 0-497<br>(0-100-2-10) | 1-22<br>(0-200-4-50) |
| Oceania        | 35 to 39 | 2010 | 0-606<br>(0-300-2-10)  | 1-73<br>(0-700-5-10)  | 0-579<br>(0-300-2-00) | 1-70<br>(0-600-4-40) |
| Oceania        | 40 to 44 | 2010 | 0-691<br>(0-400-2-00)  | 2-33<br>(1-00-5-70)   | 0-758<br>(0-400-2-10) | 2-52<br>(0-900-6-10) |
| Oceania        | 45 to 49 | 2010 | 0-694<br>(0-500-1-00)  | 2-70<br>(1-40-5-00)   | 0-828<br>(0-500-2-10) | 2-92<br>(1-10-6-30)  |
| Oceania        | 50 to 54 | 2010 | 0-738<br>(0-500-1-00)  | 2-98<br>(1-50-5-40)   | 0-875<br>(0-500-2-10) | 3-51<br>(1-30-6-70)  |
| Oceania        | 55 to 59 | 2010 | 0-765<br>(0-500-1-00)  | 3-29<br>(1-80-5-60)   | 0-899<br>(0-500-2-10) | 3-89<br>(1-60-6-80)  |
| Oceania        | 60 to 64 | 2010 | 0-776<br>(0-500-1-50)  | 3-81<br>(1-90-6-20)   | 0-888<br>(0-500-2-10) | 4-12<br>(1-70-7-10)  |
| Oceania        | 65 to 69 | 2010 | 0-772<br>(0-600-1-50)  | 3-93<br>(2-10-6-20)   | 0-866<br>(0-500-2-10) | 4-06<br>(1-70-7-20)  |
| Oceania        | 70 to 74 | 2010 | 0-746<br>(0-600-1-70)  | 4-11<br>(2-10-6-60)   | 0-824<br>(0-500-2-10) | 4-13<br>(1-70-7-20)  |
| Oceania        | 75 to 79 | 2010 | 0-704<br>(0-500-1-50)  | 3-97<br>(2-00-6-40)   | 0-810<br>(0-500-2-10) | 4-23<br>(1-70-7-10)  |
| Oceania        | 80 plus  | 2010 | 0-679<br>(0-500-1-50)  | 4-28<br>(2-10-6-50)   | 0-788<br>(0-500-2-10) | 4-20<br>(1-60-7-60)  |
| Oceania        | 15 to 19 | 2020 | 0-224<br>(0-2-20)      | 0-416<br>(0-3-20)     | 0-0216<br>(0-0-200)   | 0-0348<br>(0-0-400)  |
| Oceania        | 20 to 24 | 2020 | 0-298<br>(0-2-20)      | 0-569<br>(0-3-30)     | 0-0674<br>(0-0-400)   | 0-113<br>(0-0-700)   |
| Oceania        | 25 to 29 | 2020 | 0-396<br>(0-100-0-702) | 0-922<br>(0-100-3-00) | 0-249<br>(0-0-602)    | 0-488<br>(0-1-40)    |
| Oceania        | 30 to 34 | 2020 | 0-524<br>(0-298-2-00)  | 1-35<br>(0-400-4-00)  | 0-482<br>(0-200-2-10) | 1-23<br>(0-298-4-10) |
| Oceania        | 35 to 39 | 2020 | 0-602<br>(0-400-1-00)  | 1-68<br>(0-700-4-10)  | 0-583<br>(0-300-1-90) | 1-75<br>(0-698-4-30) |
| Oceania        | 40 to 44 | 2020 | 0-685<br>(0-400-1-00)  | 2-26<br>(1-00-5-00)   | 0-750<br>(0-400-2-00) | 2-54<br>(1-00-5-90)  |
| Oceania        | 45 to 49 | 2020 | 0-696<br>(0-500-1-00)  | 2-62<br>(1-40-4-70)   | 0-820<br>(0-500-2-00) | 2-93<br>(1-20-6-10)  |
| Oceania        | 50 to 54 | 2020 | 0-737<br>(0-500-1-00)  | 2-93<br>(1-60-5-10)   | 0-869<br>(0-500-2-00) | 3-52<br>(1-40-6-50)  |
| Oceania        | 55 to 59 | 2020 | 0-761<br>(0-500-1-00)  | 3-25<br>(1-80-5-40)   | 0-898<br>(0-600-2-00) | 3-92<br>(1-70-6-60)  |
| Oceania        | 60 to 64 | 2020 | 0-774<br>(0-600-1-00)  | 3-77<br>(2-10-5-90)   | 0-882<br>(0-600-2-10) | 4-18<br>(1-80-6-80)  |
| Oceania        | 65 to 69 | 2020 | 0-770<br>(0-600-1-00)  | 3-94<br>(2-20-6-00)   | 0-868<br>(0-600-2-10) | 4-12<br>(1-80-6-90)  |
| Oceania        | 70 to 74 | 2020 | 0-753<br>(0-600-1-50)  | 4-14<br>(2-10-6-40)   | 0-817<br>(0-500-2-00) | 4-17<br>(1-80-7-10)  |
| Oceania        | 75 to 79 | 2020 | 0-714<br>(0-500-1-50)  | 4-05<br>(2-10-6-50)   | 0-814<br>(0-500-2-00) | 4-29<br>(1-90-7-10)  |
| Oceania        | 80 plus  | 2020 | 0-701<br>(0-500-1-50)  | 4-46<br>(2-30-6-50)   | 0-798<br>(0-500-2-10) | 4-37<br>(1-80-7-30)  |
| Southeast Asia | 15 to 19 | 1990 | 0-294<br>(0-2-40)      | 0-543<br>(0-5-11)     | 0-0140<br>(0-0-100)   | 0-0191<br>(0-0-200)  |
| Southeast Asia | 20 to 24 | 1990 | 0-442<br>(0-3-00)      | 0-890<br>(0-10-0)     | 0-0578<br>(0-0-300)   | 0-0810<br>(0-0-500)  |
| Southeast Asia | 25 to 29 | 1990 | 0-552<br>(0-3-00)      | 1-20<br>(0-10-0)      | 0-142<br>(0-2-00)     | 0-251<br>(0-2-40)    |

|                |          |      |               |              |              |              |
|----------------|----------|------|---------------|--------------|--------------|--------------|
|                |          |      | 0-483         | 1-08         | 0-255        | 0-490        |
| Southeast Asia | 30 to 34 | 1990 | (0-100-2-30)  | (0-100-5-50) | (0-2-00)     | (0-2-20)     |
|                |          |      | 0-537         | 1-32         | 0-345        | 0-733        |
| Southeast Asia | 35 to 39 | 1990 | (0-200-2-20)  | (0-300-6-41) | (0-1-02)     | (0-2-40)     |
|                |          |      | 0-487         | 1-29         | 0-415        | 0-963        |
| Southeast Asia | 40 to 44 | 1990 | (0-300-2-00)  | (0-400-3-80) | (0-100-1-00) | (0-100-2-40) |
|                |          |      | 0-505         | 1-48         | 0-455        | 1-16         |
| Southeast Asia | 45 to 49 | 1990 | (0-300-2-00)  | (0-600-4-20) | (0-200-1-00) | (0-400-2-70) |
|                |          |      | 0-521         | 1-64         | 0-494        | 1-38         |
| Southeast Asia | 50 to 54 | 1990 | (0-400-1-90)  | (0-798-3-90) | (0-300-1-51) | (0-500-3-20) |
|                |          |      | 0-537         | 1-78         | 0-510        | 1-55         |
| Southeast Asia | 55 to 59 | 1990 | (0-400-1-00)  | (0-900-4-00) | (0-300-1-00) | (0-700-3-60) |
|                |          |      | 0-556         | 1-90         | 0-533        | 1-74         |
| Southeast Asia | 60 to 64 | 1990 | (0-400-1-00)  | (1-00-4-00)  | (0-400-1-70) | (0-800-4-20) |
|                |          |      | 0-562         | 2-08         | 0-547        | 1-87         |
| Southeast Asia | 65 to 69 | 1990 | (0-400-1-00)  | (1-10-4-30)  | (0-400-1-90) | (0-800-4-60) |
|                |          |      | 0-570         | 2-20         | 0-566        | 2-07         |
| Southeast Asia | 70 to 74 | 1990 | (0-400-1-00)  | (1-10-4-70)  | (0-400-1-90) | (0-900-5-40) |
|                |          |      | 0-565         | 2-30         | 0-574        | 2-22         |
| Southeast Asia | 75 to 79 | 1990 | (0-497-1-00)  | (1-20-4-80)  | (0-400-1-90) | (1-00-5-80)  |
|                |          |      | 0-580         | 2-54         | 0-608        | 2-46         |
| Southeast Asia | 80 plus  | 1990 | (0-500-1-00)  | (1-20-5-20)  | (0-400-2-00) | (1-00-6-50)  |
|                |          |      | 0-261         | 0-467        | 0-0102       | 0-0160       |
| Southeast Asia | 15 to 19 | 2000 | (0-2-30)      | (0-3-90)     | (0-0-200)    | (0-0-300)    |
|                |          |      | 0-380         | 0-771        | 0-0378       | 0-0556       |
| Southeast Asia | 20 to 24 | 2000 | (0-2-50)      | (0-7-50)     | (0-0-202)    | (0-0-402)    |
|                |          |      | 0-467         | 0-978        | 0-113        | 0-194        |
| Southeast Asia | 25 to 29 | 2000 | (0-2-50)      | (0-7-41)     | (0-0-400)    | (0-1-10)     |
|                |          |      | 0-443         | 0-987        | 0-220        | 0-435        |
| Southeast Asia | 30 to 34 | 2000 | (0-100-2-10)  | (0-100-4-20) | (0-0-500)    | (0-1-30)     |
|                |          |      | 0-496         | 1-24         | 0-327        | 0-699        |
| Southeast Asia | 35 to 39 | 2000 | (0-200-2-00)  | (0-300-4-80) | (0-1-00)     | (0-2-10)     |
|                |          |      | 0-475         | 1-28         | 0-402        | 0-962        |
| Southeast Asia | 40 to 44 | 2000 | (0-300-1-02)  | (0-500-3-20) | (0-100-1-00) | (0-200-2-30) |
|                |          |      | 0-496         | 1-50         | 0-450        | 1-19         |
| Southeast Asia | 45 to 49 | 2000 | (0-300-1-00)  | (0-700-3-50) | (0-200-1-00) | (0-400-2-50) |
|                |          |      | 0-522         | 1-68         | 0-495        | 1-45         |
| Southeast Asia | 50 to 54 | 2000 | (0-400-1-00)  | (0-900-3-50) | (0-300-1-00) | (0-600-3-00) |
|                |          |      | 0-539         | 1-82         | 0-523        | 1-65         |
| Southeast Asia | 55 to 59 | 2000 | (0-400-1-00)  | (1-00-3-60)  | (0-400-1-00) | (0-798-3-50) |
|                |          |      | 0-560         | 1-96         | 0-542        | 1-84         |
| Southeast Asia | 60 to 64 | 2000 | (0-400-1-00)  | (1-10-3-80)  | (0-400-1-00) | (0-900-4-10) |
|                |          |      | 0-568         | 2-17         | 0-546        | 1-96         |
| Southeast Asia | 65 to 69 | 2000 | (0-500-1-00)  | (1-20-4-10)  | (0-400-1-00) | (1-00-4-30)  |
|                |          |      | 0-572         | 2-27         | 0-566        | 2-13         |
| Southeast Asia | 70 to 74 | 2000 | (0-500-1-00)  | (1-20-4-30)  | (0-400-1-01) | (1-00-5-00)  |
|                |          |      | 0-566         | 2-39         | 0-572        | 2-28         |
| Southeast Asia | 75 to 79 | 2000 | (0-500-1-00)  | (1-30-4-70)  | (0-400-1-50) | (1-10-5-20)  |
|                |          |      | 0-590         | 2-71         | 0-612        | 2-57         |
| Southeast Asia | 80 plus  | 2000 | (0-500-1-00)  | (1-40-5-20)  | (0-400-2-00) | (1-10-6-10)  |
|                |          |      | 0-230         | 0-423        | 0-0170       | 0-0279       |
| Southeast Asia | 15 to 19 | 2010 | (0-2-00)      | (0-3-00)     | (0-0-200)    | (0-0-400)    |
|                |          |      | 0-386         | 0-764        | 0-0522       | 0-0862       |
| Southeast Asia | 20 to 24 | 2010 | (0-2-40)      | (0-5-90)     | (0-0-300)    | (0-0-600)    |
|                |          |      | 0-463         | 1-00         | 0-173        | 0-307        |
| Southeast Asia | 25 to 29 | 2010 | (0-2-30)      | (0-6-10)     | (0-0-512)    | (0-1-30)     |
|                |          |      | 0-428         | 1-01         | 0-283        | 0-585        |
| Southeast Asia | 30 to 34 | 2010 | (0-100-2-00)  | (0-200-3-20) | (0-0-602)    | (0-1-70)     |
|                |          |      | 0-464         | 1-21         | 0-359        | 0-826        |
| Southeast Asia | 35 to 39 | 2010 | (0-200-2-00)  | (0-400-3-50) | (0-1-00)     | (0-2-10)     |
|                |          |      | 0-460         | 1-31         | 0-419        | 1-06         |
| Southeast Asia | 40 to 44 | 2010 | (0-300-0-700) | (0-600-2-70) | (0-200-1-00) | (0-300-2-20) |
|                |          |      | 0-488         | 1-53         | 0-457        | 1-26         |
| Southeast Asia | 45 to 49 | 2010 | (0-400-0-700) | (0-800-2-90) | (0-300-1-00) | (0-500-2-40) |
|                |          |      | 0-518         | 1-73         | 0-496        | 1-52         |
| Southeast Asia | 50 to 54 | 2010 | (0-400-0-702) | (0-998-3-10) | (0-300-1-00) | (0-700-2-90) |
|                |          |      | 0-548         | 1-91         | 0-525        | 1-74         |
| Southeast Asia | 55 to 59 | 2010 | (0-400-0-800) | (1-10-3-40)  | (0-400-1-00) | (0-900-3-30) |
|                |          |      | 0-569         | 2-07         | 0-552        | 1-95         |
| Southeast Asia | 60 to 64 | 2010 | (0-500-0-800) | (1-20-3-60)  | (0-400-1-00) | (1-00-3-90)  |
|                |          |      | 0-581         | 2-30         | 0-556        | 2-08         |
| Southeast Asia | 65 to 69 | 2010 | (0-500-0-900) | (1-30-3-90)  | (0-400-1-00) | (1-10-4-20)  |
|                |          |      | 0-584         | 2-38         | 0-573        | 2-25         |
| Southeast Asia | 70 to 74 | 2010 | (0-500-1-00)  | (1-40-4-10)  | (0-400-1-00) | (1-10-4-80)  |
|                |          |      | 0-580         | 2-50         | 0-575        | 2-38         |
| Southeast Asia | 75 to 79 | 2010 | (0-500-1-00)  | (1-50-4-30)  | (0-400-1-00) | (1-20-5-00)  |
|                |          |      | 0-602         | 2-88         | 0-607        | 2-67         |
| Southeast Asia | 80 plus  | 2010 | (0-500-1-00)  | (1-50-5-10)  | (0-500-1-50) | (1-20-5-80)  |
|                |          |      | 0-220         | 0-422        | 0-0244       | 0-0405       |
| Southeast Asia | 15 to 19 | 2020 | (0-0-500)     | (0-2-10)     | (0-0-200)    | (0-0-400)    |
|                |          |      | 0-368         | 0-724        | 0-0575       | 0-100        |
| Southeast Asia | 20 to 24 | 2020 | (0-2-20)      | (0-3-60)     | (0-0-300)    | (0-0-700)    |

|                            |          |        |               |              |               |              |
|----------------------------|----------|--------|---------------|--------------|---------------|--------------|
| 0-422                      | 0-935    | 0-166  | 0-307         |              |               |              |
| Southeast Asia             | 25 to 29 | 2020   | (0-100-2-00)  | (0-100-3-90) | (0-0-400)     | (0-1-10)     |
| 0-414                      | 1-02     | 0-299  | 0-632         |              |               |              |
| Southeast Asia             | 30 to 34 | 2020   | (0-200-0-800) | (0-300-2-50) | (0-0-502)     | (0-1-50)     |
| 0-454                      | 1-22     | 0-378  | 0-895         |              |               |              |
| Southeast Asia             | 35 to 39 | 2020   | (0-300-0-800) | (0-500-2-70) | (0-100-0-700) | (0-100-2-00) |
| 0-485                      | 1-39     | 0-444  | 1-17          |              |               |              |
| Southeast Asia             | 40 to 44 | 2020   | (0-300-0-700) | (0-700-2-50) | (0-200-1-00)  | (0-400-2-20) |
| 0-511                      | 1-61     | 0-481  | 1-39          |              |               |              |
| Southeast Asia             | 45 to 49 | 2020   | (0-400-0-800) | (0-900-2-60) | (0-300-1-00)  | (0-600-2-50) |
| 0-543                      | 1-83     | 0-518  | 1-65          |              |               |              |
| Southeast Asia             | 50 to 54 | 2020   | (0-400-0-800) | (1-10-2-90)  | (0-400-1-00)  | (0-900-2-90) |
| 0-573                      | 2-02     | 0-539  | 1-87          |              |               |              |
| Southeast Asia             | 55 to 59 | 2020   | (0-400-0-800) | (1-20-3-20)  | (0-400-1-00)  | (1-00-3-30)  |
| 0-594                      | 2-21     | 0-560  | 2-07          |              |               |              |
| Southeast Asia             | 60 to 64 | 2020   | (0-500-0-800) | (1-40-3-40)  | (0-400-1-00)  | (1-10-3-70)  |
| 0-608                      | 2-48     | 0-572  | 2-21          |              |               |              |
| Southeast Asia             | 65 to 69 | 2020   | (0-500-0-900) | (1-60-3-90)  | (0-500-1-00)  | (1-20-4-00)  |
| 0-608                      | 2-57     | 0-586  | 2-42          |              |               |              |
| Southeast Asia             | 70 to 74 | 2020   | (0-500-1-00)  | (1-60-4-10)  | (0-500-1-00)  | (1-30-4-50)  |
| 0-600                      | 2-69     | 0-588  | 2-56          |              |               |              |
| Southeast Asia             | 75 to 79 | 2020   | (0-500-1-00)  | (1-60-4-40)  | (0-500-1-00)  | (1-40-4-80)  |
| 0-619                      | 3-07     | 0-619  | 2-85          |              |               |              |
| Southeast Asia             | 80 plus  | 2020   | (0-500-1-00)  | (1-70-5-00)  | (0-500-1-50)  | (1-40-5-40)  |
| 0-428                      | 0-730    | 0-0200 | 0-0263        |              |               |              |
| Central Sub-Saharan Africa | 15 to 19 | 1990   | (0-5-00)      | (0-10-0)     | (0-0-100)     | (0-0-200)    |
| 0-631                      | 1-04     | 0-0516 | 0-0715        |              |               |              |
| Central Sub-Saharan Africa | 20 to 24 | 1990   | (0-8-02)      | (0-10-0)     | (0-0-200)     | (0-0-400)    |
| 0-761                      | 1-23     | 0-112  | 0-192         |              |               |              |
| Central Sub-Saharan Africa | 25 to 29 | 1990   | (0-10-0)      | (0-10-0)     | (0-2-10)      | (0-2-90)     |
| 0-734                      | 1-28     | 0-191  | 0-340         |              |               |              |
| Central Sub-Saharan Africa | 30 to 34 | 1990   | (0-9-00)      | (0-10-0)     | (0-2-30)      | (0-3-80)     |
| 0-708                      | 1-38     | 0-272  | 0-488         |              |               |              |
| Central Sub-Saharan Africa | 35 to 39 | 1990   | (0-7-00)      | (0-10-0)     | (0-2-20)      | (0-4-40)     |
| 0-616                      | 1-38     | 0-359  | 0-683         |              |               |              |
| Central Sub-Saharan Africa | 40 to 44 | 1990   | (0-2-70)      | (0-10-0)     | (0-2-00)      | (0-3-70)     |
| 0-612                      | 1-52     | 0-472  | 0-981         |              |               |              |
| Central Sub-Saharan Africa | 45 to 49 | 1990   | (0-100-2-50)  | (0-200-10-0) | (0-2-20)      | (0-4-61)     |
| 0-663                      | 1-70     | 0-554  | 1-26          |              |               |              |
| Central Sub-Saharan Africa | 50 to 54 | 1990   | (0-200-2-50)  | (0-400-10-0) | (0-100-2-20)  | (0-200-6-10) |
| 0-650                      | 1-87     | 0-585  | 1-41          |              |               |              |
| Central Sub-Saharan Africa | 55 to 59 | 1990   | (0-300-2-40)  | (0-500-10-0) | (0-200-2-10)  | (0-400-6-10) |
| 0-655                      | 2-02     | 0-623  | 1-64          |              |               |              |
| Central Sub-Saharan Africa | 60 to 64 | 1990   | (0-300-2-30)  | (0-600-9-20) | (0-300-2-10)  | (0-500-6-20) |
| 0-634                      | 2-18     | 0-629  | 1-74          |              |               |              |
| Central Sub-Saharan Africa | 65 to 69 | 1990   | (0-400-2-10)  | (0-700-7-80) | (0-300-2-00)  | (0-600-6-10) |
| 0-636                      | 2-34     | 0-658  | 2-07          |              |               |              |
| Central Sub-Saharan Africa | 70 to 74 | 1990   | (0-400-2-00)  | (0-900-7-20) | (0-400-2-10)  | (0-700-7-30) |
| 0-621                      | 2-39     | 0-662  | 2-15          |              |               |              |
| Central Sub-Saharan Africa | 75 to 79 | 1990   | (0-400-2-00)  | (0-900-6-80) | (0-400-2-10)  | (0-800-7-30) |
| 0-624                      | 2-48     | 0-676  | 2-39          |              |               |              |
| Central Sub-Saharan Africa | 80 plus  | 1990   | (0-400-1-50)  | (1-00-6-10)  | (0-400-2-20)  | (0-800-7-40) |
| 0-443                      | 0-776    | 0-0287 | 0-0332        |              |               |              |
| Central Sub-Saharan Africa | 15 to 19 | 2000   | (0-5-00)      | (0-10-0)     | (0-0-100)     | (0-0-100)    |
| 0-624                      | 1-06     | 0-0506 | 0-0718        |              |               |              |
| Central Sub-Saharan Africa | 20 to 24 | 2000   | (0-8-02)      | (0-10-0)     | (0-0-200)     | (0-0-300)    |
| 0-762                      | 1-26     | 0-114  | 0-199         |              |               |              |
| Central Sub-Saharan Africa | 25 to 29 | 2000   | (0-10-0)      | (0-10-0)     | (0-2-10)      | (0-3-10)     |
| 0-734                      | 1-31     | 0-199  | 0-368         |              |               |              |
| Central Sub-Saharan Africa | 30 to 34 | 2000   | (0-8-02)      | (0-10-0)     | (0-2-40)      | (0-4-41)     |
| 0-720                      | 1-44     | 0-262  | 0-493         |              |               |              |
| Central Sub-Saharan Africa | 35 to 39 | 2000   | (0-7-00)      | (0-10-0)     | (0-2-30)      | (0-4-11)     |
| 0-624                      | 1-42     | 0-363  | 0-725         |              |               |              |
| Central Sub-Saharan Africa | 40 to 44 | 2000   | (0-2-71)      | (0-10-0)     | (0-2-10)      | (0-4-50)     |
| 0-623                      | 1-54     | 0-485  | 1-02          |              |               |              |
| Central Sub-Saharan Africa | 45 to 49 | 2000   | (0-100-2-50)  | (0-200-10-0) | (0-2-20)      | (0-5-90)     |
| 0-674                      | 1-73     | 0-556  | 1-28          |              |               |              |
| Central Sub-Saharan Africa | 50 to 54 | 2000   | (0-200-2-50)  | (0-400-10-0) | (0-200-2-20)  | (0-300-6-31) |
| 0-677                      | 1-89     | 0-595  | 1-45          |              |               |              |
| Central Sub-Saharan Africa | 55 to 59 | 2000   | (0-300-2-40)  | (0-500-10-0) | (0-200-2-10)  | (0-400-6-30) |
| 0-672                      | 2-03     | 0-626  | 1-67          |              |               |              |
| Central Sub-Saharan Africa | 60 to 64 | 2000   | (0-300-2-30)  | (0-600-8-70) | (0-300-2-10)  | (0-500-6-10) |
| 0-652                      | 2-19     | 0-632  | 1-78          |              |               |              |
| Central Sub-Saharan Africa | 65 to 69 | 2000   | (0-400-2-20)  | (0-700-7-70) | (0-300-2-00)  | (0-600-6-20) |
| 0-640                      | 2-35     | 0-666  | 2-09          |              |               |              |
| Central Sub-Saharan Africa | 70 to 74 | 2000   | (0-400-2-10)  | (0-800-7-60) | (0-400-2-20)  | (0-700-7-40) |
| 0-627                      | 2-39     | 0-663  | 2-18          |              |               |              |
| Central Sub-Saharan Africa | 75 to 79 | 2000   | (0-400-2-00)  | (0-900-6-90) | (0-400-2-10)  | (0-800-7-20) |
| 0-636                      | 2-47     | 0-686  | 2-43          |              |               |              |
| Central Sub-Saharan Africa | 80 plus  | 2000   | (0-400-1-80)  | (0-900-6-20) | (0-400-2-20)  | (0-800-7-60) |
| 0-359                      | 0-642    | 0-0177 | 0-0256        |              |               |              |
| Central Sub-Saharan Africa | 15 to 19 | 2010   | (0-3-02)      | (0-10-0)     | (0-0-100)     | (0-0-100)    |

|                            |          |      |              |              |               |               |
|----------------------------|----------|------|--------------|--------------|---------------|---------------|
|                            |          |      | 0-545        | 0-967        | 0-0418        | 0-0520        |
| Central Sub-Saharan Africa | 20 to 24 | 2010 | (0-7-00)     | (0-10-0)     | (0-0-200)     | (0-0-300)     |
|                            |          |      | 0-651        | 1-16         | 0-102         | 0-169         |
| Central Sub-Saharan Africa | 25 to 29 | 2010 | (0-7-00)     | (0-10-0)     | (0-2-00)      | (0-2-70)      |
|                            |          |      | 0-647        | 1-20         | 0-185         | 0-332         |
| Central Sub-Saharan Africa | 30 to 34 | 2010 | (0-7-00)     | (0-10-0)     | (0-2-30)      | (0-3-90)      |
|                            |          |      | 0-655        | 1-36         | 0-258         | 0-487         |
| Central Sub-Saharan Africa | 35 to 39 | 2010 | (0-5-02)     | (0-10-0)     | (0-2-20)      | (0-4-10)      |
|                            |          |      | 0-583        | 1-32         | 0-373         | 0-710         |
| Central Sub-Saharan Africa | 40 to 44 | 2010 | (0-2-60)     | (0-10-0)     | (0-2-00)      | (0-3-90)      |
|                            |          |      | 0-611        | 1-47         | 0-470         | 0-994         |
| Central Sub-Saharan Africa | 45 to 49 | 2010 | (0-200-2-40) | (0-300-10-0) | (0-2-10)      | (0-4-61)      |
|                            |          |      | 0-647        | 1-68         | 0-563         | 1-27          |
| Central Sub-Saharan Africa | 50 to 54 | 2010 | (0-200-2-50) | (0-400-10-0) | (0-200-2-20)  | (0-300-6-10)  |
|                            |          |      | 0-663        | 1-84         | 0-592         | 1-43          |
| Central Sub-Saharan Africa | 55 to 59 | 2010 | (0-300-2-30) | (0-500-10-0) | (0-200-2-00)  | (0-400-5-40)  |
|                            |          |      | 0-659        | 2-03         | 0-625         | 1-67          |
| Central Sub-Saharan Africa | 60 to 64 | 2010 | (0-300-2-30) | (0-700-8-80) | (0-300-2-00)  | (0-600-5-41)  |
|                            |          |      | 0-645        | 2-14         | 0-630         | 1-79          |
| Central Sub-Saharan Africa | 65 to 69 | 2010 | (0-400-2-20) | (0-798-7-70) | (0-300-2-00)  | (0-700-5-30)  |
|                            |          |      | 0-631        | 2-31         | 0-659         | 2-13          |
| Central Sub-Saharan Africa | 70 to 74 | 2010 | (0-400-2-00) | (0-900-6-90) | (0-400-2-10)  | (0-800-7-00)  |
|                            |          |      | 0-623        | 2-37         | 0-652         | 2-21          |
| Central Sub-Saharan Africa | 75 to 79 | 2010 | (0-400-2-00) | (0-900-6-60) | (0-400-2-10)  | (0-800-6-80)  |
|                            |          |      | 0-628        | 2-47         | 0-680         | 2-49          |
| Central Sub-Saharan Africa | 80 plus  | 2010 | (0-400-1-50) | (1-00-6-00)  | (0-400-2-10)  | (0-900-7-10)  |
|                            |          |      | 0-212        | 0-362        | 0-0137        | 0-0172        |
| Central Sub-Saharan Africa | 15 to 19 | 2020 | (0-2-60)     | (0-5-01)     | (0-0-100)     | (0-0-100)     |
|                            |          |      | 0-355        | 0-658        | 0-0195        | 0-0292        |
| Central Sub-Saharan Africa | 20 to 24 | 2020 | (0-3-00)     | (0-10-0)     | (0-0-100)     | (0-0-200)     |
|                            |          |      | 0-459        | 0-826        | 0-0630        | 0-0996        |
| Central Sub-Saharan Africa | 25 to 29 | 2020 | (0-4-02)     | (0-10-0)     | (0-0-302)     | (0-0-802)     |
|                            |          |      | 0-476        | 0-932        | 0-127         | 0-227         |
| Central Sub-Saharan Africa | 30 to 34 | 2020 | (0-3-00)     | (0-10-0)     | (0-2-00)      | (0-2-60)      |
|                            |          |      | 0-518        | 1-11         | 0-211         | 0-378         |
| Central Sub-Saharan Africa | 35 to 39 | 2020 | (0-2-60)     | (0-10-0)     | (0-2-00)      | (0-3-10)      |
|                            |          |      | 0-503        | 1-15         | 0-353         | 0-655         |
| Central Sub-Saharan Africa | 40 to 44 | 2020 | (0-100-2-30) | (0-100-6-61) | (0-2-00)      | (0-3-00)      |
|                            |          |      | 0-534        | 1-33         | 0-463         | 0-958         |
| Central Sub-Saharan Africa | 45 to 49 | 2020 | (0-200-2-20) | (0-300-6-20) | (0-2-00)      | (0-3-60)      |
|                            |          |      | 0-571        | 1-51         | 0-556         | 1-27          |
| Central Sub-Saharan Africa | 50 to 54 | 2020 | (0-298-2-20) | (0-400-6-50) | (0-200-2-00)  | (0-398-4-00)  |
|                            |          |      | 0-611        | 1-72         | 0-599         | 1-45          |
| Central Sub-Saharan Africa | 55 to 59 | 2020 | (0-300-2-10) | (0-600-6-70) | (0-300-2-00)  | (0-500-4-20)  |
|                            |          |      | 0-624        | 1-94         | 0-625         | 1-73          |
| Central Sub-Saharan Africa | 60 to 64 | 2020 | (0-400-2-00) | (0-798-6-20) | (0-400-2-00)  | (0-700-4-90)  |
|                            |          |      | 0-625        | 2-09         | 0-621         | 1-85          |
| Central Sub-Saharan Africa | 65 to 69 | 2020 | (0-400-2-00) | (0-900-5-50) | (0-400-2-00)  | (0-800-4-40)  |
|                            |          |      | 0-626        | 2-31         | 0-649         | 2-20          |
| Central Sub-Saharan Africa | 70 to 74 | 2020 | (0-400-1-50) | (1-00-5-70)  | (0-400-2-00)  | (0-900-5-50)  |
|                            |          |      | 0-625        | 2-42         | 0-650         | 2-31          |
| Central Sub-Saharan Africa | 75 to 79 | 2020 | (0-400-1-50) | (1-10-5-50)  | (0-400-2-00)  | (1-00-5-60)   |
|                            |          |      | 0-638        | 2-58         | 0-673         | 2-64          |
| Central Sub-Saharan Africa | 80 plus  | 2020 | (0-497-1-50) | (1-10-5-60)  | (0-500-2-00)  | (1-10-6-20)   |
|                            |          |      | 0-355        | 0-668        | 0-106         | 0-180         |
| Eastern Sub-Saharan Africa | 15 to 19 | 1990 | (0-2-60)     | (0-8-30)     | (0-1-02)      | (0-2-00)      |
|                            |          |      | 0-607        | 1-14         | 0-205         | 0-368         |
| Eastern Sub-Saharan Africa | 20 to 24 | 1990 | (0-5-00)     | (0-10-0)     | (0-2-40)      | (0-4-10)      |
|                            |          |      | 0-731        | 1-29         | 0-283         | 0-546         |
| Eastern Sub-Saharan Africa | 25 to 29 | 1990 | (0-8-00)     | (0-10-0)     | (0-2-50)      | (0-7-20)      |
|                            |          |      | 0-673        | 1-34         | 0-473         | 0-966         |
| Eastern Sub-Saharan Africa | 30 to 34 | 1990 | (0-6-00)     | (0-10-0)     | (0-3-00)      | (0-10-0)      |
|                            |          |      | 0-695        | 1-48         | 0-488         | 0-994         |
| Eastern Sub-Saharan Africa | 35 to 39 | 1990 | (0-5-00)     | (0-10-0)     | (0-2-80)      | (0-8-51)      |
|                            |          |      | 0-522        | 1-17         | 0-452         | 0-927         |
| Eastern Sub-Saharan Africa | 40 to 44 | 1990 | (0-100-2-20) | (0-100-6-41) | (0-2-20)      | (0-5-01)      |
|                            |          |      | 0-540        | 1-27         | 0-522         | 1-19          |
| Eastern Sub-Saharan Africa | 45 to 49 | 1990 | (0-100-2-20) | (0-200-6-70) | (0-0975-2-30) | (0-0975-6-80) |
|                            |          |      | 0-612        | 1-50         | 0-555         | 1-30          |
| Eastern Sub-Saharan Africa | 50 to 54 | 1990 | (0-200-2-40) | (0-300-10-0) | (0-100-2-30)  | (0-100-7-11)  |
|                            |          |      | 0-591        | 1-55         | 0-580         | 1-44          |
| Eastern Sub-Saharan Africa | 55 to 59 | 1990 | (0-200-2-20) | (0-400-7-91) | (0-200-2-30)  | (0-300-7-40)  |
|                            |          |      | 0-579        | 1-55         | 0-540         | 1-42          |
| Eastern Sub-Saharan Africa | 60 to 64 | 1990 | (0-300-2-10) | (0-500-6-40) | (0-300-2-00)  | (0-500-4-40)  |
|                            |          |      | 0-526        | 1-51         | 0-521         | 1-44          |
| Eastern Sub-Saharan Africa | 65 to 69 | 1990 | (0-300-2-00) | (0-600-4-10) | (0-300-2-00)  | (0-500-4-10)  |
|                            |          |      | 0-553        | 1-68         | 0-580         | 1-69          |
| Eastern Sub-Saharan Africa | 70 to 74 | 1990 | (0-300-2-00) | (0-700-5-30) | (0-300-2-10)  | (0-600-6-10)  |
|                            |          |      | 0-549        | 1-74         | 0-561         | 1-68          |
| Eastern Sub-Saharan Africa | 75 to 79 | 1990 | (0-400-1-50) | (0-800-4-60) | (0-300-2-00)  | (0-600-6-10)  |
|                            |          |      | 0-562        | 1-74         | 0-588         | 1-84          |
| Eastern Sub-Saharan Africa | 80 plus  | 1990 | (0-300-1-50) | (0-800-4-80) | (0-300-2-10)  | (0-700-6-80)  |

|                            |          |      |                       |                       |                        |                      |
|----------------------------|----------|------|-----------------------|-----------------------|------------------------|----------------------|
| Eastern Sub-Saharan Africa | 15 to 19 | 2000 | 0-299<br>(0-2-50)     | 0-553<br>(0-6-21)     | 0-0732<br>(0-0-300)    | 0-118<br>(0-0-600)   |
| Eastern Sub-Saharan Africa | 20 to 24 | 2000 | 0-472<br>(0-3-00)     | 0-950<br>(0-10-0)     | 0-130<br>(0-2-00)      | 0-230<br>(0-3-10)    |
| Eastern Sub-Saharan Africa | 25 to 29 | 2000 | 0-558<br>(0-4-00)     | 1-10<br>(0-10-0)      | 0-219<br>(0-2-40)      | 0-394<br>(0-4-41)    |
| Eastern Sub-Saharan Africa | 30 to 34 | 2000 | 0-554<br>(0-3-00)     | 1-17<br>(0-10-0)      | 0-389<br>(0-2-60)      | 0-778<br>(0-7-90)    |
| Eastern Sub-Saharan Africa | 35 to 39 | 2000 | 0-573<br>(0-2-60)     | 1-31<br>(0-10-0)      | 0-420<br>(0-2-40)      | 0-818<br>(0-6-40)    |
| Eastern Sub-Saharan Africa | 40 to 44 | 2000 | 0-491<br>(0-100-2-10) | 1-09<br>(0-100-4-61)  | 0-406<br>(0-2-00)      | 0-821<br>(0-3-70)    |
| Eastern Sub-Saharan Africa | 45 to 49 | 2000 | 0-505<br>(0-200-2-10) | 1-18<br>(0-298-5-00)  | 0-488<br>(0-2-10)      | 1-06<br>(0-5-00)     |
| Eastern Sub-Saharan Africa | 50 to 54 | 2000 | 0-558<br>(0-200-2-20) | 1-37<br>(0-300-7-40)  | 0-518<br>(0-100-2-10)  | 1-18<br>(0-200-5-61) |
| Eastern Sub-Saharan Africa | 55 to 59 | 2000 | 0-563<br>(0-300-2-10) | 1-47<br>(0-498-6-40)  | 0-546<br>(0-200-2-10)  | 1-34<br>(0-400-5-61) |
| Eastern Sub-Saharan Africa | 60 to 64 | 2000 | 0-555<br>(0-300-2-00) | 1-50<br>(0-500-5-10)  | 0-525<br>(0-300-2-00)  | 1-41<br>(0-500-3-90) |
| Eastern Sub-Saharan Africa | 65 to 69 | 2000 | 0-527<br>(0-300-1-51) | 1-51<br>(0-700-3-60)  | 0-515<br>(0-300-2-00)  | 1-43<br>(0-600-3-60) |
| Eastern Sub-Saharan Africa | 70 to 74 | 2000 | 0-551<br>(0-400-1-90) | 1-68<br>(0-700-4-50)  | 0-570<br>(0-300-2-00)  | 1-68<br>(0-700-5-60) |
| Eastern Sub-Saharan Africa | 75 to 79 | 2000 | 0-547<br>(0-400-1-00) | 1-76<br>(0-800-4-20)  | 0-567<br>(0-300-2-00)  | 1-70<br>(0-700-5-20) |
| Eastern Sub-Saharan Africa | 80 plus  | 2000 | 0-563<br>(0-400-1-50) | 1-78<br>(0-800-4-50)  | 0-591<br>(0-400-2-00)  | 1-87<br>(0-700-6-70) |
| Eastern Sub-Saharan Africa | 15 to 19 | 2010 | 0-212<br>(0-2-20)     | 0-382<br>(0-3-30)     | 0-0374<br>(0-0-200)    | 0-0563<br>(0-0-400)  |
| Eastern Sub-Saharan Africa | 20 to 24 | 2010 | 0-352<br>(0-2-50)     | 0-669<br>(0-6-51)     | 0-0698<br>(0-0-415)    | 0-118<br>(0-1-00)    |
| Eastern Sub-Saharan Africa | 25 to 29 | 2010 | 0-413<br>(0-2-60)     | 0-798<br>(0-8-00)     | 0-132<br>(0-2-00)      | 0-242<br>(0-3-00)    |
| Eastern Sub-Saharan Africa | 30 to 34 | 2010 | 0-441<br>(0-2-40)     | 0-911<br>(0-7-20)     | 0-313<br>(0-2-40)      | 0-600<br>(0-5-00)    |
| Eastern Sub-Saharan Africa | 35 to 39 | 2010 | 0-479<br>(0-2-30)     | 1-03<br>(0-6-70)      | 0-344<br>(0-2-20)      | 0-674<br>(0-4-30)    |
| Eastern Sub-Saharan Africa | 40 to 44 | 2010 | 0-422<br>(0-100-2-00) | 0-936<br>(0-100-3-00) | 0-371<br>(0-2-00)      | 0-739<br>(0-2-70)    |
| Eastern Sub-Saharan Africa | 45 to 49 | 2010 | 0-452<br>(0-200-2-00) | 1-05<br>(0-300-3-10)  | 0-442<br>(0-2-00)      | 0-961<br>(0-3-40)    |
| Eastern Sub-Saharan Africa | 50 to 54 | 2010 | 0-503<br>(0-200-2-00) | 1-22<br>(0-300-4-30)  | 0-470<br>(0-100-2-00)  | 1-09<br>(0-200-3-90) |
| Eastern Sub-Saharan Africa | 55 to 59 | 2010 | 0-523<br>(0-300-2-00) | 1-38<br>(0-500-4-10)  | 0-511<br>(0-200-2-00)  | 1-26<br>(0-400-4-00) |
| Eastern Sub-Saharan Africa | 60 to 64 | 2010 | 0-527<br>(0-300-1-90) | 1-45<br>(0-600-3-80)  | 0-507<br>(0-300-1-00)  | 1-39<br>(0-600-3-00) |
| Eastern Sub-Saharan Africa | 65 to 69 | 2010 | 0-523<br>(0-400-1-00) | 1-50<br>(0-700-3-20)  | 0-501<br>(0-300-1-00)  | 1-43<br>(0-698-2-90) |
| Eastern Sub-Saharan Africa | 70 to 74 | 2010 | 0-544<br>(0-400-1-00) | 1-69<br>(0-800-4-00)  | 0-546<br>(0-400-2-00)  | 1-68<br>(0-700-4-40) |
| Eastern Sub-Saharan Africa | 75 to 79 | 2010 | 0-548<br>(0-400-1-00) | 1-79<br>(0-900-3-80)  | 0-552<br>(0-400-1-90)  | 1-69<br>(0-800-4-40) |
| Eastern Sub-Saharan Africa | 80 plus  | 2010 | 0-565<br>(0-400-1-00) | 1-80<br>(0-898-4-10)  | 0-584<br>(0-400-2-00)  | 1-89<br>(0-800-5-50) |
| Eastern Sub-Saharan Africa | 15 to 19 | 2020 | 0-154<br>(0-2-00)     | 0-270<br>(0-2-10)     | 0-0239<br>(0-0-200)    | 0-0407<br>(0-0-400)  |
| Eastern Sub-Saharan Africa | 20 to 24 | 2020 | 0-269<br>(0-2-30)     | 0-499<br>(0-3-50)     | 0-0452<br>(0-0-300)    | 0-0732<br>(0-0-500)  |
| Eastern Sub-Saharan Africa | 25 to 29 | 2020 | 0-304<br>(0-2-30)     | 0-583<br>(0-4-10)     | 0-0930<br>(0-1-00)     | 0-164<br>(0-1-30)    |
| Eastern Sub-Saharan Africa | 30 to 34 | 2020 | 0-369<br>(0-2-10)     | 0-726<br>(0-3-50)     | 0-274<br>(0-2-10)      | 0-501<br>(0-3-20)    |
| Eastern Sub-Saharan Africa | 35 to 39 | 2020 | 0-408<br>(0-2-00)     | 0-851<br>(0-3-70)     | 0-313<br>(0-2-00)      | 0-595<br>(0-3-20)    |
| Eastern Sub-Saharan Africa | 40 to 44 | 2020 | 0-403<br>(0-100-1-00) | 0-890<br>(0-100-2-30) | 0-358<br>(0-1-00)      | 0-731<br>(0-2-30)    |
| Eastern Sub-Saharan Africa | 45 to 49 | 2020 | 0-437<br>(0-200-1-00) | 1-02<br>(0-300-2-40)  | 0-427<br>(0-2-00)      | 0-935<br>(0-2-80)    |
| Eastern Sub-Saharan Africa | 50 to 54 | 2020 | 0-461<br>(0-200-1-51) | 1-15<br>(0-400-2-90)  | 0-457<br>(0-200-2-00)  | 1-06<br>(0-300-2-80) |
| Eastern Sub-Saharan Africa | 55 to 59 | 2020 | 0-500<br>(0-300-1-00) | 1-35<br>(0-600-3-00)  | 0-492<br>(0-300-1-51)  | 1-25<br>(0-500-3-00) |
| Eastern Sub-Saharan Africa | 60 to 64 | 2020 | 0-519<br>(0-300-1-00) | 1-45<br>(0-700-3-10)  | 0-506<br>(0-400-1-00)  | 1-43<br>(0-700-2-70) |
| Eastern Sub-Saharan Africa | 65 to 69 | 2020 | 0-524<br>(0-400-1-00) | 1-54<br>(0-800-2-70)  | 0-504<br>(0-400-0-900) | 1-47<br>(0-700-2-70) |
| Eastern Sub-Saharan Africa | 70 to 74 | 2020 | 0-545<br>(0-400-1-00) | 1-70<br>(0-900-3-40)  | 0-543<br>(0-400-1-00)  | 1-70<br>(0-900-3-60) |
| Eastern Sub-Saharan Africa | 75 to 79 | 2020 | 0-550<br>(0-400-1-00) | 1-83<br>(1-00-3-30)   | 0-547<br>(0-400-1-00)  | 1-70<br>(0-900-3-50) |

|                             |          |      |                       |                      |                       |                      |
|-----------------------------|----------|------|-----------------------|----------------------|-----------------------|----------------------|
| Eastern Sub-Saharan Africa  | 80 plus  | 2020 | 0.567<br>(0.400-1.00) | 1.83<br>(0.900-3.60) | 0.582<br>(0.400-1.50) | 1.89<br>(0.900-4.40) |
| Southern Sub-Saharan Africa | 15 to 19 | 1990 | 0.282<br>(0-3.00)     | 0.485<br>(0-7.63)    | 0.0121<br>(0-0)       | 0.0169<br>(0-0)      |
| Southern Sub-Saharan Africa | 20 to 24 | 1990 | 0.346<br>(0-5.00)     | 0.595<br>(0-10.0)    | 0.0176<br>(0-0)       | 0.0306<br>(0-0)      |
| Southern Sub-Saharan Africa | 25 to 29 | 1990 | 0.276<br>(0-3.00)     | 0.506<br>(0-7.30)    | 0.0239<br>(0-0.100)   | 0.0309<br>(0-0.102)  |
| Southern Sub-Saharan Africa | 30 to 34 | 1990 | 0.270<br>(0-2.60)     | 0.487<br>(0-5.41)    | 0.0559<br>(0-0.300)   | 0.0581<br>(0-0.500)  |
| Southern Sub-Saharan Africa | 35 to 39 | 1990 | 0.306<br>(0-2.30)     | 0.582<br>(0-4.01)    | 0.122<br>(0-1.00)     | 0.202<br>(0-2.11)    |
| Southern Sub-Saharan Africa | 40 to 44 | 1990 | 0.365<br>(0-2.00)     | 0.776<br>(0-3.40)    | 0.255<br>(0-2.20)     | 0.480<br>(0-3.70)    |
| Southern Sub-Saharan Africa | 45 to 49 | 1990 | 0.447<br>(0.200-2.00) | 1.10<br>(0.300-3.30) | 0.381<br>(0-2.20)     | 0.807<br>(0-4.71)    |
| Southern Sub-Saharan Africa | 50 to 54 | 1990 | 0.509<br>(0.300-1.00) | 1.32<br>(0.600-3.00) | 0.478<br>(0.100-2.10) | 1.10<br>(0.200-4.30) |
| Southern Sub-Saharan Africa | 55 to 59 | 1990 | 0.555<br>(0.400-1.00) | 1.51<br>(0.800-3.10) | 0.537<br>(0.200-2.10) | 1.36<br>(0.400-4.70) |
| Southern Sub-Saharan Africa | 60 to 64 | 1990 | 0.614<br>(0.400-1.00) | 1.84<br>(1.00-3.80)  | 0.622<br>(0.300-2.20) | 1.74<br>(0.600-6.80) |
| Southern Sub-Saharan Africa | 65 to 69 | 1990 | 0.617<br>(0.500-1.00) | 1.97<br>(1.10-3.60)  | 0.617<br>(0.400-2.00) | 1.82<br>(0.700-6.10) |
| Southern Sub-Saharan Africa | 70 to 74 | 1990 | 0.617<br>(0.500-1.00) | 2.13<br>(1.20-3.80)  | 0.623<br>(0.400-2.00) | 1.99<br>(0.800-6.00) |
| Southern Sub-Saharan Africa | 75 to 79 | 1990 | 0.615<br>(0.500-1.00) | 2.29<br>(1.40-4.00)  | 0.628<br>(0.400-2.00) | 2.17<br>(0.900-5.70) |
| Southern Sub-Saharan Africa | 80 plus  | 1990 | 0.627<br>(0.500-1.00) | 2.59<br>(1.40-4.50)  | 0.642<br>(0.500-1.90) | 2.53<br>(1.10-6.00)  |
| Southern Sub-Saharan Africa | 15 to 19 | 2000 | 0.319<br>(0-3.00)     | 0.552<br>(0-10.0)    | 0.0138<br>(0-0.100)   | 0.0201<br>(0-0.102)  |
| Southern Sub-Saharan Africa | 20 to 24 | 2000 | 0.426<br>(0-5.00)     | 0.728<br>(0-10.0)    | 0.0257<br>(0-0.100)   | 0.0430<br>(0-0.200)  |
| Southern Sub-Saharan Africa | 25 to 29 | 2000 | 0.282<br>(0-2.80)     | 0.516<br>(0-7.80)    | 0.0354<br>(0-0.200)   | 0.0533<br>(0-0.400)  |
| Southern Sub-Saharan Africa | 30 to 34 | 2000 | 0.255<br>(0-2.50)     | 0.494<br>(0-6.71)    | 0.0666<br>(0-0.400)   | 0.0933<br>(0-1.00)   |
| Southern Sub-Saharan Africa | 35 to 39 | 2000 | 0.301<br>(0-2.30)     | 0.558<br>(0-4.20)    | 0.128<br>(0-2.00)     | 0.210<br>(0-2.50)    |
| Southern Sub-Saharan Africa | 40 to 44 | 2000 | 0.366<br>(0-2.00)     | 0.759<br>(0-3.30)    | 0.274<br>(0-2.20)     | 0.506<br>(0-3.40)    |
| Southern Sub-Saharan Africa | 45 to 49 | 2000 | 0.460<br>(0.200-2.00) | 1.10<br>(0.300-3.50) | 0.403<br>(0-2.10)     | 0.841<br>(0-4.10)    |
| Southern Sub-Saharan Africa | 50 to 54 | 2000 | 0.530<br>(0.300-1.00) | 1.38<br>(0.600-3.20) | 0.480<br>(0.200-2.00) | 1.14<br>(0.300-4.20) |
| Southern Sub-Saharan Africa | 55 to 59 | 2000 | 0.581<br>(0.400-1.00) | 1.60<br>(0.800-3.40) | 0.552<br>(0.300-2.00) | 1.40<br>(0.500-4.60) |
| Southern Sub-Saharan Africa | 60 to 64 | 2000 | 0.638<br>(0.500-1.00) | 1.97<br>(1.10-4.20)  | 0.635<br>(0.300-2.10) | 1.78<br>(0.600-6.50) |
| Southern Sub-Saharan Africa | 65 to 69 | 2000 | 0.644<br>(0.500-1.00) | 2.10<br>(1.20-3.90)  | 0.619<br>(0.400-2.00) | 1.87<br>(0.800-5.70) |
| Southern Sub-Saharan Africa | 70 to 74 | 2000 | 0.638<br>(0.500-1.00) | 2.27<br>(1.30-4.00)  | 0.622<br>(0.400-2.00) | 2.03<br>(0.900-5.30) |
| Southern Sub-Saharan Africa | 75 to 79 | 2000 | 0.631<br>(0.500-1.00) | 2.37<br>(1.40-4.00)  | 0.622<br>(0.400-2.00) | 2.17<br>(1.00-5.40)  |
| Southern Sub-Saharan Africa | 80 plus  | 2000 | 0.637<br>(0.500-1.00) | 2.62<br>(1.50-4.50)  | 0.634<br>(0.500-1.50) | 2.46<br>(1.10-5.60)  |
| Southern Sub-Saharan Africa | 15 to 19 | 2010 | 0.452<br>(0-5.00)     | 0.793<br>(0-10.0)    | 0.0248<br>(0-0.100)   | 0.0374<br>(0-0.200)  |
| Southern Sub-Saharan Africa | 20 to 24 | 2010 | 0.553<br>(0-7.00)     | 0.963<br>(0-10.0)    | 0.0439<br>(0-0.200)   | 0.0706<br>(0-0.400)  |
| Southern Sub-Saharan Africa | 25 to 29 | 2010 | 0.420<br>(0-5.00)     | 0.797<br>(0-10.0)    | 0.0655<br>(0-0.500)   | 0.0778<br>(0-0.702)  |
| Southern Sub-Saharan Africa | 30 to 34 | 2010 | 0.378<br>(0-2.80)     | 0.732<br>(0-10.0)    | 0.0867<br>(0-1.00)    | 0.122<br>(0-1.00)    |
| Southern Sub-Saharan Africa | 35 to 39 | 2010 | 0.383<br>(0-2.50)     | 0.769<br>(0-7.60)    | 0.176<br>(0-2.30)     | 0.298<br>(0-3.30)    |
| Southern Sub-Saharan Africa | 40 to 44 | 2010 | 0.442<br>(0-2.30)     | 0.919<br>(0-5.10)    | 0.311<br>(0-2.40)     | 0.585<br>(0-4.90)    |
| Southern Sub-Saharan Africa | 45 to 49 | 2010 | 0.511<br>(0.200-2.10) | 1.22<br>(0.400-4.60) | 0.456<br>(0-2.30)     | 0.967<br>(0-5.71)    |
| Southern Sub-Saharan Africa | 50 to 54 | 2010 | 0.556<br>(0.300-1.80) | 1.46<br>(0.700-3.80) | 0.535<br>(0.200-2.20) | 1.26<br>(0.300-5.40) |
| Southern Sub-Saharan Africa | 55 to 59 | 2010 | 0.612<br>(0.400-1.01) | 1.68<br>(0.898-3.80) | 0.601<br>(0.300-2.10) | 1.52<br>(0.500-5.80) |
| Southern Sub-Saharan Africa | 60 to 64 | 2010 | 0.665<br>(0.500-1.00) | 2.06<br>(1.00-4.70)  | 0.667<br>(0.300-2.20) | 1.89<br>(0.700-7.00) |
| Southern Sub-Saharan Africa | 65 to 69 | 2010 | 0.671<br>(0.500-1.00) | 2.19<br>(1.20-4.30)  | 0.647<br>(0.400-2.00) | 1.97<br>(0.800-5.90) |
| Southern Sub-Saharan Africa | 70 to 74 | 2010 | 0.657<br>(0.500-1.00) | 2.33<br>(1.30-4.10)  | 0.645<br>(0.400-2.00) | 2.12<br>(0.900-5.60) |

|                             |          |      |              |              |              |              |
|-----------------------------|----------|------|--------------|--------------|--------------|--------------|
|                             |          |      | 0.647        | 2.45         | 0.643        | 2.27         |
| Southern Sub-Saharan Africa | 75 to 79 | 2010 | (0.500-1.00) | (1.50-4.10)  | (0.497-1.90) | (1.00-5.40)  |
|                             |          |      | 0.645        | 2.63         | 0.652        | 2.57         |
| Southern Sub-Saharan Africa | 80 plus  | 2010 | (0.500-1.00) | (1.50-4.30)  | (0.500-1.50) | (1.20-5.50)  |
|                             |          |      | 0.332        | 0.607        | 0.0182       | 0.0269       |
| Southern Sub-Saharan Africa | 15 to 19 | 2020 | (0-3.00)     | (0-10.0)     | (0-0.100)    | (0-0.200)    |
|                             |          |      | 0.431        | 0.798        | 0.0194       | 0.0303       |
| Southern Sub-Saharan Africa | 20 to 24 | 2020 | (0-5.00)     | (0-10.0)     | (0-0.100)    | (0-0.100)    |
|                             |          |      | 0.354        | 0.645        | 0.0215       | 0.0419       |
| Southern Sub-Saharan Africa | 25 to 29 | 2020 | (0-3.00)     | (0-10.0)     | (0-0.100)    | (0-0.102)    |
|                             |          |      | 0.306        | 0.593        | 0.0351       | 0.0434       |
| Southern Sub-Saharan Africa | 30 to 34 | 2020 | (0-2.60)     | (0-7.40)     | (0-0.200)    | (0-0.300)    |
|                             |          |      | 0.321        | 0.599        | 0.112        | 0.178        |
| Southern Sub-Saharan Africa | 35 to 39 | 2020 | (0-2.30)     | (0-3.81)     | (0-1.00)     | (0-2.00)     |
|                             |          |      | 0.382        | 0.800        | 0.270        | 0.492        |
| Southern Sub-Saharan Africa | 40 to 44 | 2020 | (0-2.00)     | (0-3.20)     | (0-2.10)     | (0-3.20)     |
|                             |          |      | 0.493        | 1.16         | 0.422        | 0.871        |
| Southern Sub-Saharan Africa | 45 to 49 | 2020 | (0.300-1.00) | (0.400-3.00) | (0-2.10)     | (0-3.80)     |
|                             |          |      | 0.568        | 1.46         | 0.489        | 1.21         |
| Southern Sub-Saharan Africa | 50 to 54 | 2020 | (0.400-1.00) | (0.800-2.80) | (0.200-2.00) | (0.400-3.70) |
|                             |          |      | 0.630        | 1.71         | 0.565        | 1.49         |
| Southern Sub-Saharan Africa | 55 to 59 | 2020 | (0.400-1.00) | (1.00-3.10)  | (0.300-2.00) | (0.600-4.20) |
|                             |          |      | 0.683        | 2.11         | 0.640        | 1.86         |
| Southern Sub-Saharan Africa | 60 to 64 | 2020 | (0.500-1.00) | (1.20-3.90)  | (0.400-2.00) | (0.800-5.50) |
|                             |          |      | 0.685        | 2.27         | 0.643        | 2.01         |
| Southern Sub-Saharan Africa | 65 to 69 | 2020 | (0.500-1.00) | (1.30-3.70)  | (0.400-1.90) | (1.00-4.70)  |
|                             |          |      | 0.676        | 2.45         | 0.656        | 2.21         |
| Southern Sub-Saharan Africa | 70 to 74 | 2020 | (0.500-1.00) | (1.50-3.90)  | (0.500-1.01) | (1.10-4.70)  |
|                             |          |      | 0.666        | 2.58         | 0.658        | 2.42         |
| Southern Sub-Saharan Africa | 75 to 79 | 2020 | (0.500-1.00) | (1.60-4.00)  | (0.500-1.00) | (1.20-4.90)  |
|                             |          |      | 0.661        | 2.78         | 0.670        | 2.79         |
| Southern Sub-Saharan Africa | 80 plus  | 2020 | (0.500-1.00) | (1.70-4.40)  | (0.500-1.50) | (1.40-5.30)  |
|                             |          |      | 0.188        | 0.337        | 0.0296       | 0.0450       |
| Western Sub-Saharan Africa  | 15 to 19 | 1990 | (0-2.00)     | (0-2.10)     | (0-0.200)    | (0-0.400)    |
|                             |          |      | 0.294        | 0.558        | 0.0735       | 0.109        |
| Western Sub-Saharan Africa  | 20 to 24 | 1990 | (0-2.30)     | (0-4.90)     | (0-0.300)    | (0-0.602)    |
|                             |          |      | 0.351        | 0.670        | 0.130        | 0.219        |
| Western Sub-Saharan Africa  | 25 to 29 | 1990 | (0-2.40)     | (0-6.30)     | (0-2.00)     | (0-2.30)     |
|                             |          |      | 0.402        | 0.829        | 0.263        | 0.468        |
| Western Sub-Saharan Africa  | 30 to 34 | 1990 | (0-2.10)     | (0-3.90)     | (0-2.20)     | (0-3.51)     |
|                             |          |      | 0.437        | 0.945        | 0.304        | 0.569        |
| Western Sub-Saharan Africa  | 35 to 39 | 1990 | (0-2.10)     | (0-4.10)     | (0-2.00)     | (0-3.31)     |
|                             |          |      | 0.408        | 0.940        | 0.398        | 0.816        |
| Western Sub-Saharan Africa  | 40 to 44 | 1990 | (0.100-1.00) | (0.200-2.60) | (0-2.00)     | (0-3.10)     |
|                             |          |      | 0.478        | 1.23         | 0.470        | 1.07         |
| Western Sub-Saharan Africa  | 45 to 49 | 1990 | (0.200-2.00) | (0.400-3.40) | (0.100-2.00) | (0.200-3.80) |
|                             |          |      | 0.501        | 1.47         | 0.528        | 1.32         |
| Western Sub-Saharan Africa  | 50 to 54 | 1990 | (0.300-1.90) | (0.600-3.70) | (0.200-2.00) | (0.400-4.71) |
|                             |          |      | 0.511        | 1.49         | 0.531        | 1.37         |
| Western Sub-Saharan Africa  | 55 to 59 | 1990 | (0.300-1.90) | (0.600-3.70) | (0.300-2.00) | (0.500-4.10) |
|                             |          |      | 0.558        | 1.78         | 0.503        | 1.42         |
| Western Sub-Saharan Africa  | 60 to 64 | 1990 | (0.400-1.50) | (0.800-4.30) | (0.300-1.00) | (0.600-3.10) |
|                             |          |      | 0.562        | 1.97         | 0.544        | 1.66         |
| Western Sub-Saharan Africa  | 65 to 69 | 1990 | (0.400-1.01) | (1.00-4.40)  | (0.400-1.80) | (0.800-3.70) |
|                             |          |      | 0.583        | 2.03         | 0.587        | 2.00         |
| Western Sub-Saharan Africa  | 70 to 74 | 1990 | (0.400-2.00) | (0.900-5.10) | (0.400-2.00) | (0.800-5.50) |
|                             |          |      | 0.572        | 2.22         | 0.615        | 2.15         |
| Western Sub-Saharan Africa  | 75 to 79 | 1990 | (0.400-1.50) | (1.10-5.20)  | (0.400-2.00) | (0.900-6.20) |
|                             |          |      | 0.594        | 2.37         | 0.635        | 2.37         |
| Western Sub-Saharan Africa  | 80 plus  | 1990 | (0.400-1.50) | (1.10-5.60)  | (0.400-2.00) | (0.900-6.90) |
|                             |          |      | 0.170        | 0.312        | 0.0219       | 0.0348       |
| Western Sub-Saharan Africa  | 15 to 19 | 2000 | (0-0.502)    | (0-1.30)     | (0-0.200)    | (0-0.400)    |
|                             |          |      | 0.280        | 0.526        | 0.0502       | 0.0800       |
| Western Sub-Saharan Africa  | 20 to 24 | 2000 | (0-2.20)     | (0-3.40)     | (0-0.300)    | (0-0.500)    |
|                             |          |      | 0.326        | 0.621        | 0.0867       | 0.145        |
| Western Sub-Saharan Africa  | 25 to 29 | 2000 | (0-2.30)     | (0-5.00)     | (0-0.400)    | (0-1.00)     |
|                             |          |      | 0.397        | 0.804        | 0.216        | 0.383        |
| Western Sub-Saharan Africa  | 30 to 34 | 2000 | (0-2.00)     | (0-3.40)     | (0-2.00)     | (0-2.90)     |
|                             |          |      | 0.429        | 0.914        | 0.275        | 0.522        |
| Western Sub-Saharan Africa  | 35 to 39 | 2000 | (0-2.00)     | (0-3.70)     | (0-2.00)     | (0-2.70)     |
|                             |          |      | 0.411        | 0.949        | 0.392        | 0.821        |
| Western Sub-Saharan Africa  | 40 to 44 | 2000 | (0.100-1.00) | (0.200-2.40) | (0-2.00)     | (0-2.70)     |
|                             |          |      | 0.479        | 1.25         | 0.460        | 1.09         |
| Western Sub-Saharan Africa  | 45 to 49 | 2000 | (0.300-1.90) | (0.500-3.20) | (0.100-2.00) | (0.200-3.50) |
|                             |          |      | 0.509        | 1.49         | 0.529        | 1.35         |
| Western Sub-Saharan Africa  | 50 to 54 | 2000 | (0.300-1.80) | (0.698-3.60) | (0.200-2.00) | (0.400-4.40) |
|                             |          |      | 0.519        | 1.53         | 0.537        | 1.41         |
| Western Sub-Saharan Africa  | 55 to 59 | 2000 | (0.300-1.80) | (0.700-3.90) | (0.300-2.00) | (0.500-4.00) |
|                             |          |      | 0.569        | 1.85         | 0.512        | 1.49         |
| Western Sub-Saharan Africa  | 60 to 64 | 2000 | (0.400-1.50) | (0.900-4.20) | (0.300-1.00) | (0.700-3.10) |
|                             |          |      | 0.577        | 2.05         | 0.559        | 1.75         |
| Western Sub-Saharan Africa  | 65 to 69 | 2000 | (0.400-1.00) | (1.00-4.50)  | (0.400-1.70) | (0.800-3.80) |

|                            |          |      |                        |                       |                       |                      |
|----------------------------|----------|------|------------------------|-----------------------|-----------------------|----------------------|
| Western Sub-Saharan Africa | 70 to 74 | 2000 | 0-588<br>(0-400-1-60)  | 2-09<br>(1-00-5-10)   | 0-591<br>(0-400-2-00) | 2-08<br>(0-900-5-60) |
| Western Sub-Saharan Africa | 75 to 79 | 2000 | 0-584<br>(0-400-1-50)  | 2-28<br>(1-10-5-30)   | 0-617<br>(0-400-2-00) | 2-23<br>(0-900-6-10) |
| Western Sub-Saharan Africa | 80 plus  | 2000 | 0-608<br>(0-500-1-50)  | 2-42<br>(1-10-5-50)   | 0-641<br>(0-400-2-00) | 2-47<br>(1-00-6-60)  |
| Western Sub-Saharan Africa | 15 to 19 | 2010 | 0-167<br>(0-0-402)     | 0-305<br>(0-1-00)     | 0-0161<br>(0-0-200)   | 0-0260<br>(0-0-300)  |
| Western Sub-Saharan Africa | 20 to 24 | 2010 | 0-240<br>(0-2-00)      | 0-464<br>(0-2-40)     | 0-0322<br>(0-0-200)   | 0-0525<br>(0-0-400)  |
| Western Sub-Saharan Africa | 25 to 29 | 2010 | 0-277<br>(0-2-00)      | 0-529<br>(0-2-90)     | 0-0617<br>(0-0-300)   | 0-103<br>(0-0-700)   |
| Western Sub-Saharan Africa | 30 to 34 | 2010 | 0-354<br>(0-1-00)      | 0-740<br>(0-2-30)     | 0-155<br>(0-1-00)     | 0-281<br>(0-1-40)    |
| Western Sub-Saharan Africa | 35 to 39 | 2010 | 0-376<br>(0-1-00)      | 0-829<br>(0-2-40)     | 0-224<br>(0-1-00)     | 0-425<br>(0-1-90)    |
| Western Sub-Saharan Africa | 40 to 44 | 2010 | 0-398<br>(0-100-0-805) | 0-920<br>(0-200-2-10) | 0-351<br>(0-1-00)     | 0-754<br>(0-2-20)    |
| Western Sub-Saharan Africa | 45 to 49 | 2010 | 0-469<br>(0-300-1-00)  | 1-20<br>(0-500-2-50)  | 0-427<br>(0-198-1-00) | 1-00<br>(0-298-2-50) |
| Western Sub-Saharan Africa | 50 to 54 | 2010 | 0-503<br>(0-300-1-00)  | 1-48<br>(0-700-3-00)  | 0-489<br>(0-300-1-90) | 1-26<br>(0-498-3-10) |
| Western Sub-Saharan Africa | 55 to 59 | 2010 | 0-516<br>(0-400-1-00)  | 1-54<br>(0-800-3-10)  | 0-500<br>(0-300-1-00) | 1-35<br>(0-600-3-00) |
| Western Sub-Saharan Africa | 60 to 64 | 2010 | 0-578<br>(0-400-1-00)  | 1-90<br>(1-00-3-80)   | 0-511<br>(0-400-1-00) | 1-48<br>(0-700-2-80) |
| Western Sub-Saharan Africa | 65 to 69 | 2010 | 0-588<br>(0-400-1-00)  | 2-14<br>(1-10-4-20)   | 0-552<br>(0-400-1-00) | 1-74<br>(0-900-3-40) |
| Western Sub-Saharan Africa | 70 to 74 | 2010 | 0-588<br>(0-400-1-00)  | 2-17<br>(1-10-4-60)   | 0-578<br>(0-400-1-80) | 2-06<br>(1-00-4-80)  |
| Western Sub-Saharan Africa | 75 to 79 | 2010 | 0-588<br>(0-500-1-00)  | 2-43<br>(1-30-5-00)   | 0-604<br>(0-400-1-90) | 2-24<br>(1-00-5-20)  |
| Western Sub-Saharan Africa | 80 plus  | 2010 | 0-620<br>(0-500-1-00)  | 2-60<br>(1-20-5-30)   | 0-625<br>(0-400-2-00) | 2-51<br>(1-10-5-80)  |
| Western Sub-Saharan Africa | 15 to 19 | 2020 | 0-174<br>(0-0-400)     | 0-317<br>(0-1-00)     | 0-0169<br>(0-0-200)   | 0-0261<br>(0-0-400)  |
| Western Sub-Saharan Africa | 20 to 24 | 2020 | 0-221<br>(0-0-500)     | 0-423<br>(0-1-30)     | 0-0267<br>(0-0-200)   | 0-0445<br>(0-0-400)  |
| Western Sub-Saharan Africa | 25 to 29 | 2020 | 0-241<br>(0-1-00)      | 0-454<br>(0-2-00)     | 0-0484<br>(0-0-300)   | 0-0837<br>(0-0-600)  |
| Western Sub-Saharan Africa | 30 to 34 | 2020 | 0-339<br>(0-0-600)     | 0-710<br>(0-1-70)     | 0-149<br>(0-0-402)    | 0-262<br>(0-1-00)    |
| Western Sub-Saharan Africa | 35 to 39 | 2020 | 0-355<br>(0-0-600)     | 0-774<br>(0-2-00)     | 0-216<br>(0-0-500)    | 0-405<br>(0-1-10)    |
| Western Sub-Saharan Africa | 40 to 44 | 2020 | 0-397<br>(0-100-0-700) | 0-905<br>(0-200-1-80) | 0-360<br>(0-1-00)     | 0-775<br>(0-2-00)    |
| Western Sub-Saharan Africa | 45 to 49 | 2020 | 0-467<br>(0-300-1-00)  | 1-17<br>(0-500-2-20)  | 0-426<br>(0-200-1-00) | 1-03<br>(0-300-2-30) |
| Western Sub-Saharan Africa | 50 to 54 | 2020 | 0-498<br>(0-400-0-802) | 1-46<br>(0-800-2-60)  | 0-485<br>(0-300-1-00) | 1-29<br>(0-500-2-70) |
| Western Sub-Saharan Africa | 55 to 59 | 2020 | 0-519<br>(0-400-1-00)  | 1-54<br>(0-800-2-70)  | 0-512<br>(0-300-1-00) | 1-42<br>(0-700-2-80) |
| Western Sub-Saharan Africa | 60 to 64 | 2020 | 0-591<br>(0-400-1-00)  | 1-95<br>(1-10-3-60)   | 0-529<br>(0-400-1-00) | 1-59<br>(0-800-2-70) |
| Western Sub-Saharan Africa | 65 to 69 | 2020 | 0-603<br>(0-500-1-00)  | 2-23<br>(1-20-4-00)   | 0-574<br>(0-400-1-00) | 1-89<br>(1-00-3-40)  |
| Western Sub-Saharan Africa | 70 to 74 | 2020 | 0-608<br>(0-500-1-00)  | 2-29<br>(1-20-4-40)   | 0-583<br>(0-400-1-00) | 2-23<br>(1-10-4-50)  |
| Western Sub-Saharan Africa | 75 to 79 | 2020 | 0-604<br>(0-500-1-00)  | 2-61<br>(1-40-5-00)   | 0-614<br>(0-500-1-01) | 2-44<br>(1-20-5-20)  |
| Western Sub-Saharan Africa | 80 plus  | 2020 | 0-633<br>(0-500-1-00)  | 2-79<br>(1-40-5-10)   | 0-645<br>(0-500-1-80) | 2-78<br>(1-20-5-80)  |



Figure S1

Central Europe, Eastern Europe, and Central Asia

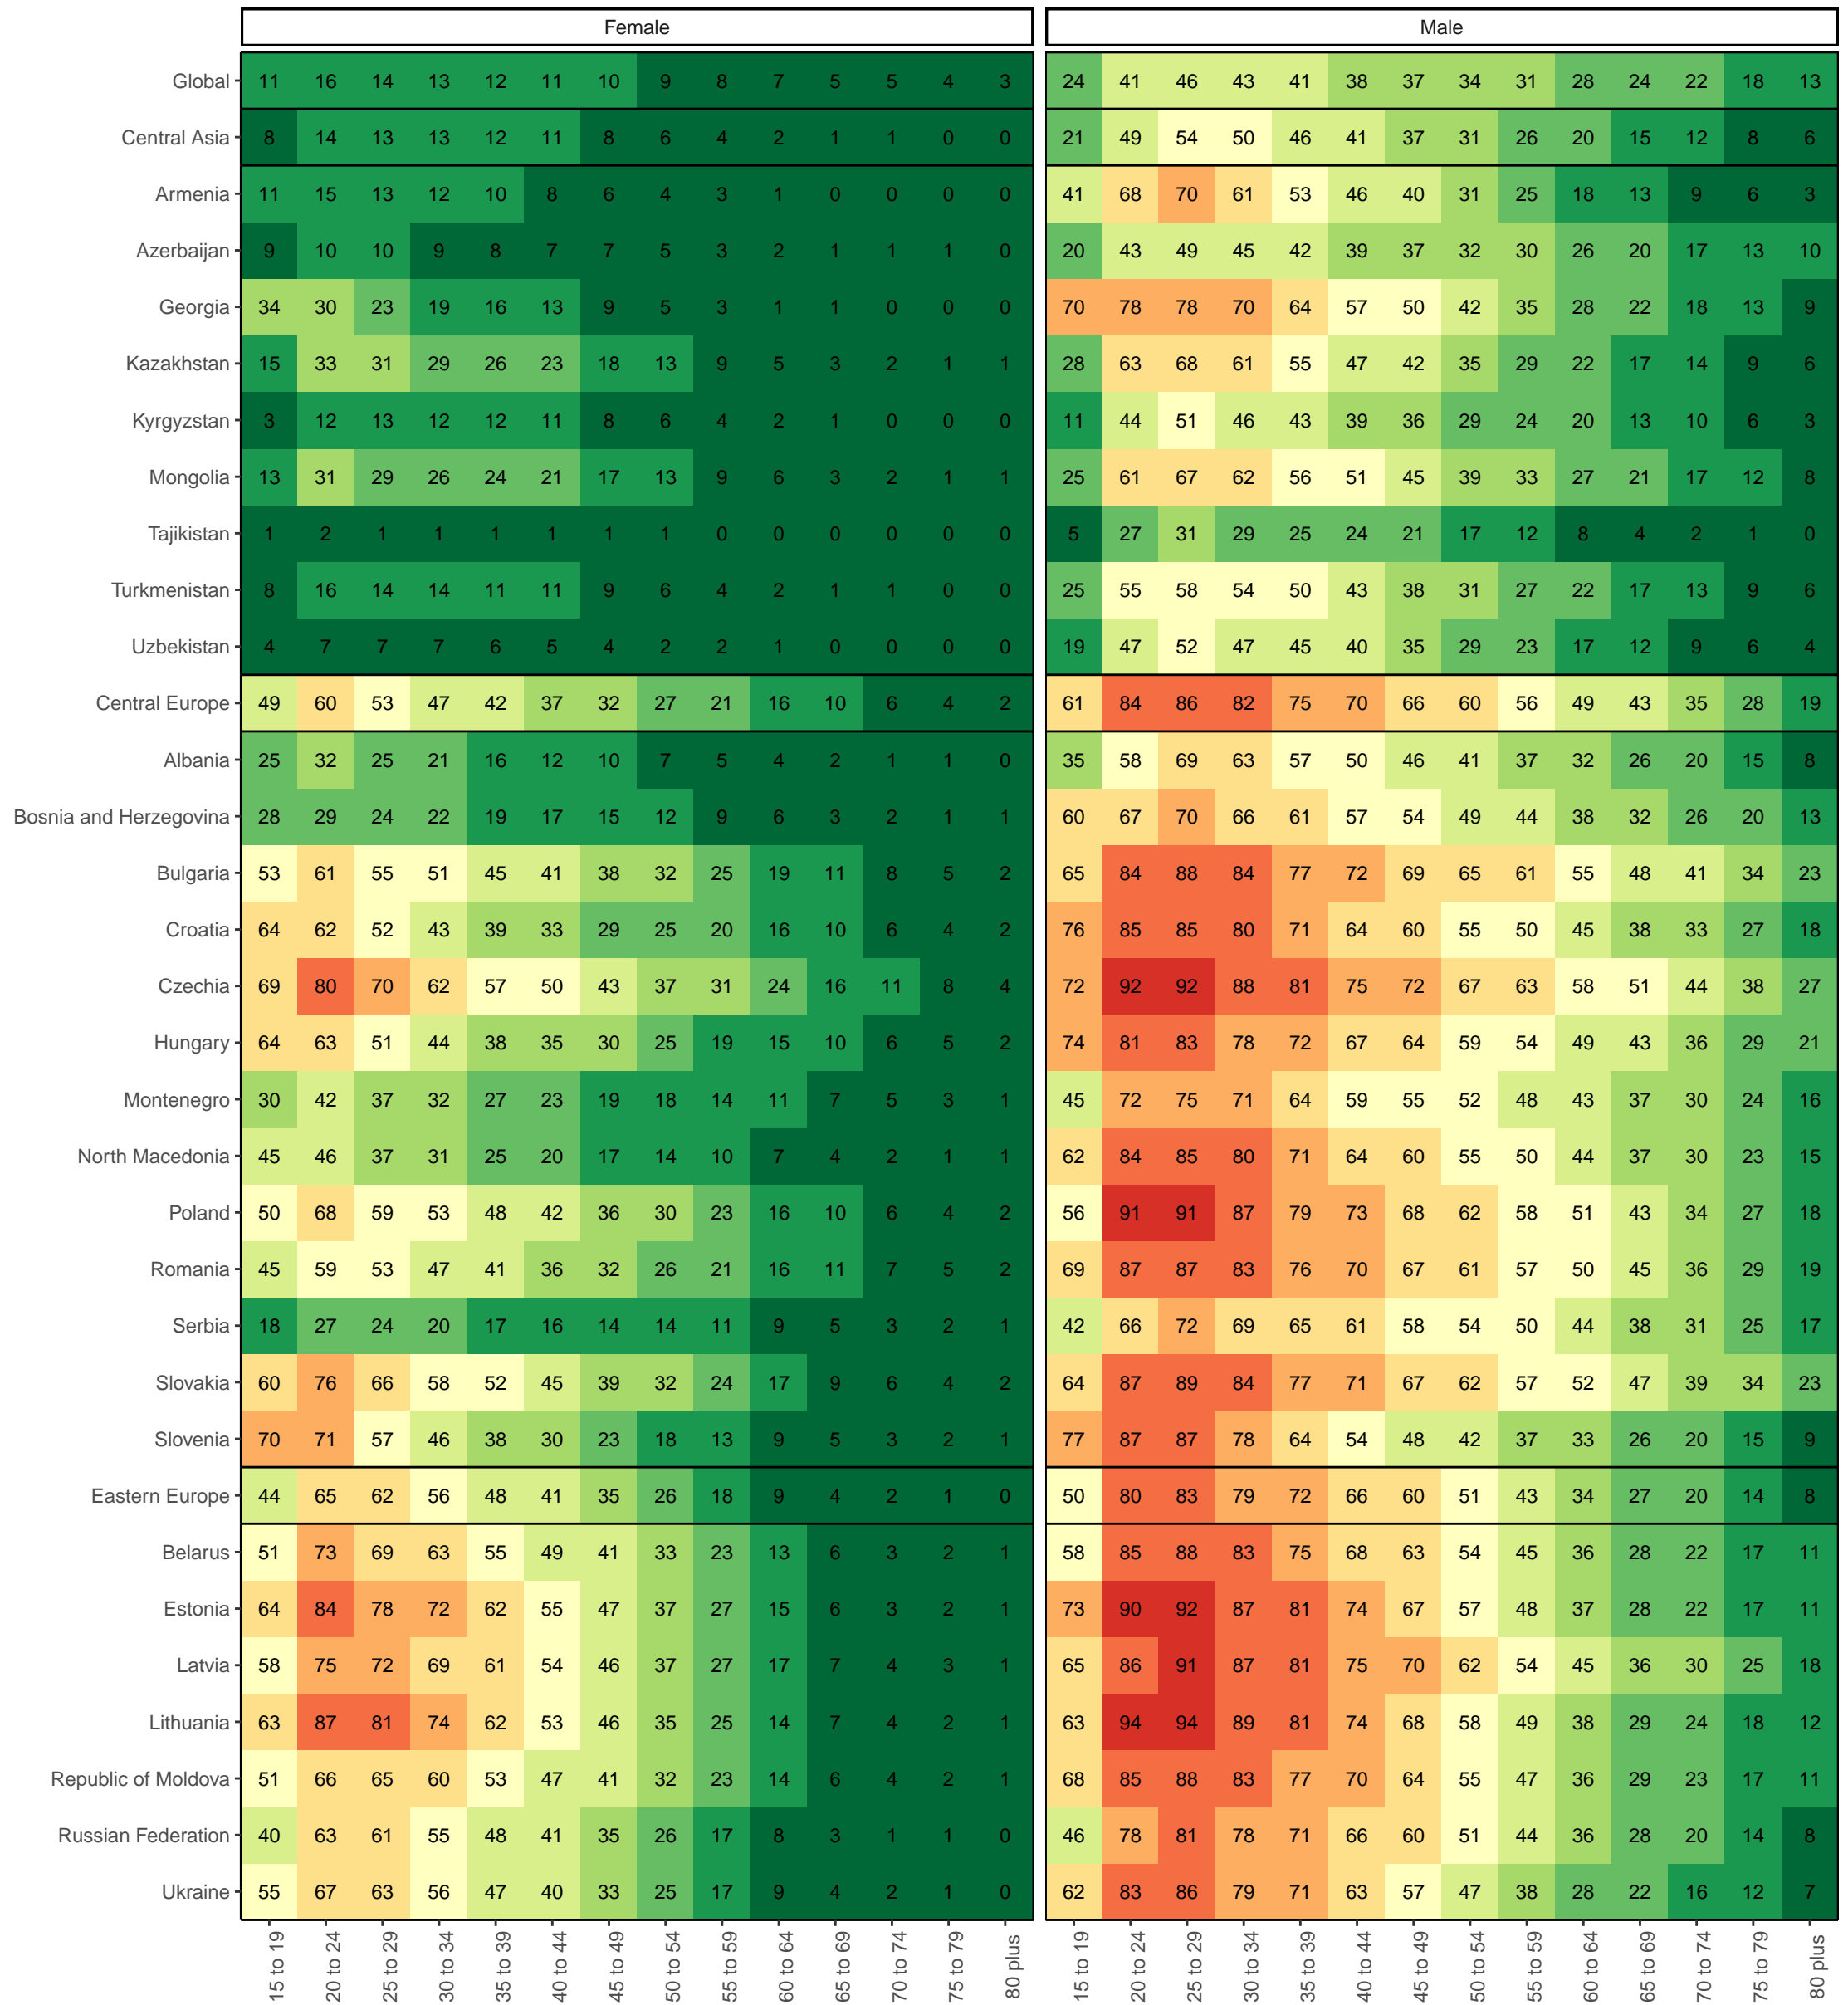

High-income

|                           | Female |    |    |    |    |    |    |    |    |    |    |    |    |    | Male |    |    |    |    |    |    |    |    |    |    |    |    |    |
|---------------------------|--------|----|----|----|----|----|----|----|----|----|----|----|----|----|------|----|----|----|----|----|----|----|----|----|----|----|----|----|
| Australasia               | 63     | 84 | 82 | 81 | 77 | 73 | 65 | 56 | 48 | 41 | 31 | 23 | 16 | 9  | 63   | 89 | 91 | 88 | 82 | 74 | 67 | 61 | 57 | 51 | 44 | 37 | 29 | 19 |
| Australia                 | 62     | 84 | 83 | 82 | 78 | 73 | 65 | 56 | 47 | 40 | 30 | 23 | 16 | 9  | 62   | 90 | 91 | 89 | 83 | 74 | 67 | 62 | 58 | 52 | 45 | 37 | 30 | 19 |
| New Zealand               | 67     | 82 | 78 | 76 | 74 | 71 | 66 | 59 | 51 | 44 | 36 | 27 | 18 | 10 | 67   | 86 | 89 | 86 | 79 | 70 | 63 | 57 | 55 | 48 | 42 | 34 | 26 | 16 |
| High-income Asia Pacific  | 25     | 62 | 58 | 56 | 52 | 48 | 43 | 36 | 30 | 23 | 18 | 16 | 12 | 8  | 40   | 77 | 77 | 71 | 65 | 60 | 56 | 52 | 49 | 43 | 38 | 35 | 29 | 19 |
| Brunei Darussalam         | 2      | 3  | 3  | 3  | 2  | 2  | 2  | 2  | 1  | 1  | 1  | 1  | 0  | 0  | 5    | 6  | 7  | 6  | 5  | 4  | 3  | 3  | 3  | 2  | 2  | 1  | 1  | 0  |
| Japan                     | 24     | 77 | 73 | 70 | 64 | 58 | 51 | 43 | 36 | 27 | 21 | 18 | 13 | 8  | 39   | 88 | 86 | 79 | 72 | 64 | 60 | 55 | 52 | 45 | 39 | 35 | 29 | 19 |
| Republic of Korea         | 26     | 36 | 35 | 34 | 32 | 30 | 28 | 24 | 20 | 17 | 13 | 11 | 9  | 6  | 42   | 61 | 65 | 61 | 59 | 55 | 53 | 49 | 47 | 43 | 38 | 33 | 29 | 21 |
| Singapore                 | 25     | 35 | 31 | 29 | 25 | 22 | 18 | 14 | 10 | 7  | 5  | 3  | 2  | 1  | 35   | 50 | 50 | 44 | 36 | 29 | 25 | 21 | 19 | 15 | 11 | 8  | 5  | 2  |
| High-income North America | 38     | 65 | 64 | 53 | 44 | 40 | 36 | 31 | 27 | 21 | 17 | 13 | 10 | 6  | 39   | 74 | 80 | 74 | 63 | 55 | 49 | 44 | 41 | 34 | 29 | 24 | 18 | 12 |
| Canada                    | 54     | 74 | 68 | 57 | 49 | 43 | 39 | 33 | 28 | 23 | 17 | 13 | 10 | 5  | 59   | 83 | 85 | 79 | 68 | 59 | 54 | 47 | 43 | 37 | 30 | 25 | 19 | 11 |
| Greenland                 | 44     | 65 | 60 | 51 | 43 | 38 | 34 | 28 | 23 | 19 | 14 | 11 | 8  | 4  | 41   | 76 | 79 | 74 | 63 | 55 | 50 | 44 | 39 | 33 | 28 | 22 | 17 | 11 |
| United States of America  | 36     | 64 | 64 | 53 | 44 | 40 | 36 | 31 | 27 | 21 | 17 | 13 | 10 | 6  | 37   | 73 | 79 | 74 | 63 | 55 | 49 | 44 | 40 | 34 | 28 | 23 | 18 | 12 |
| Southern Latin America    | 69     | 62 | 60 | 55 | 49 | 42 | 37 | 31 | 26 | 22 | 17 | 14 | 11 | 7  | 75   | 77 | 80 | 78 | 72 | 63 | 56 | 50 | 46 | 41 | 36 | 31 | 26 | 17 |
| Argentina                 | 75     | 62 | 60 | 55 | 49 | 42 | 36 | 30 | 25 | 21 | 16 | 13 | 10 | 6  | 80   | 77 | 81 | 78 | 72 | 62 | 55 | 48 | 45 | 40 | 35 | 30 | 24 | 16 |
| Chile                     | 59     | 63 | 61 | 57 | 50 | 45 | 39 | 33 | 28 | 24 | 19 | 16 | 12 | 8  | 66   | 78 | 81 | 79 | 73 | 65 | 59 | 53 | 49 | 45 | 40 | 35 | 29 | 20 |
| Uruguay                   | 38     | 48 | 47 | 44 | 39 | 35 | 31 | 27 | 23 | 20 | 15 | 13 | 10 | 7  | 54   | 69 | 73 | 70 | 66 | 58 | 51 | 46 | 43 | 38 | 34 | 30 | 25 | 17 |
| Western Europe            | 61     | 73 | 66 | 62 | 60 | 58 | 55 | 48 | 42 | 36 | 28 | 22 | 17 | 11 | 68   | 85 | 87 | 81 | 74 | 69 | 65 | 61 | 58 | 53 | 47 | 40 | 33 | 24 |
| Andorra                   | 65     | 76 | 68 | 65 | 63 | 61 | 57 | 50 | 43 | 36 | 28 | 22 | 16 | 10 | 71   | 87 | 88 | 83 | 75 | 69 | 66 | 60 | 57 | 52 | 45 | 38 | 31 | 21 |
| Austria                   | 55     | 72 | 66 | 61 | 63 | 61 | 56 | 50 | 42 | 36 | 30 | 23 | 17 | 11 | 67   | 87 | 87 | 82 | 75 | 70 | 66 | 61 | 58 | 52 | 46 | 38 | 32 | 23 |
| Belgium                   | 71     | 73 | 65 | 64 | 62 | 62 | 58 | 52 | 45 | 37 | 30 | 24 | 17 | 12 | 72   | 85 | 85 | 79 | 74 | 68 | 65 | 60 | 57 | 52 | 45 | 37 | 30 | 21 |
| Cyprus                    | 65     | 65 | 56 | 49 | 48 | 46 | 42 | 35 | 28 | 23 | 16 | 13 | 8  | 5  | 70   | 89 | 90 | 85 | 77 | 72 | 66 | 59 | 55 | 48 | 42 | 35 | 28 | 18 |
| Denmark                   | 77     | 82 | 76 | 70 | 69 | 69 | 63 | 56 | 48 | 41 | 33 | 27 | 20 | 12 | 82   | 90 | 91 | 85 | 75 | 68 | 64 | 59 | 56 | 50 | 43 | 37 | 30 | 20 |
| Finland                   | 64     | 80 | 73 | 69 | 67 | 65 | 61 | 53 | 44 | 36 | 25 | 19 | 13 | 7  | 62   | 86 | 89 | 84 | 75 | 68 | 65 | 59 | 55 | 47 | 39 | 30 | 22 | 13 |
| France                    | 64     | 74 | 66 | 62 | 63 | 62 | 58 | 51 | 44 | 37 | 29 | 23 | 17 | 10 | 73   | 87 | 88 | 82 | 76 | 71 | 68 | 64 | 61 | 56 | 51 | 45 | 38 | 28 |
| Germany                   | 68     | 79 | 73 | 68 | 67 | 66 | 63 | 56 | 50 | 44 | 35 | 28 | 21 | 15 | 74   | 88 | 89 | 85 | 79 | 74 | 70 | 67 | 64 | 59 | 53 | 47 | 40 | 30 |
| Greece                    | 72     | 77 | 69 | 63 | 59 | 57 | 49 | 40 | 31 | 24 | 17 | 12 | 8  | 4  | 76   | 88 | 88 | 82 | 74 | 67 | 63 | 57 | 54 | 48 | 41 | 34 | 26 | 17 |
| Iceland                   | 46     | 80 | 72 | 67 | 65 | 63 | 57 | 49 | 41 | 34 | 25 | 19 | 14 | 8  | 51   | 88 | 88 | 82 | 73 | 66 | 62 | 56 | 52 | 46 | 39 | 32 | 25 | 16 |
| Ireland                   | 59     | 82 | 74 | 68 | 67 | 63 | 58 | 49 | 41 | 36 | 26 | 19 | 14 | 8  | 66   | 87 | 88 | 81 | 74 | 67 | 63 | 57 | 53 | 45 | 39 | 32 | 25 | 17 |
| Israel                    | 41     | 64 | 55 | 50 | 47 | 45 | 39 | 28 | 20 | 15 | 9  | 6  | 4  | 2  | 60   | 80 | 80 | 69 | 55 | 45 | 39 | 31 | 27 | 21 | 15 | 10 | 6  | 3  |
| Italy                     | 42     | 63 | 54 | 51 | 48 | 46 | 45 | 40 | 36 | 32 | 23 | 24 | 18 | 10 | 53   | 81 | 84 | 78 | 70 | 65 | 63 | 58 | 56 | 52 | 44 | 43 | 36 | 23 |
| Luxembourg                | 62     | 76 | 69 | 64 | 65 | 62 | 57 | 53 | 45 | 38 | 30 | 23 | 16 | 10 | 67   | 87 | 88 | 83 | 77 | 70 | 67 | 63 | 60 | 55 | 51 | 44 | 37 | 28 |
| Malta                     | 74     | 71 | 63 | 54 | 52 | 47 | 42 | 35 | 28 | 23 | 17 | 12 | 8  | 5  | 72   | 85 | 86 | 80 | 71 | 63 | 58 | 52 | 49 | 41 | 35 | 29 | 22 | 14 |
| Monaco                    | 68     | 74 | 64 | 59 | 57 | 54 | 49 | 41 | 33 | 26 | 20 | 15 | 11 | 6  | 68   | 86 | 86 | 78 | 66 | 57 | 52 | 46 | 43 | 36 | 31 | 25 | 19 | 12 |
| Netherlands               | 65     | 71 | 64 | 60 | 59 | 58 | 55 | 50 | 45 | 38 | 32 | 24 | 18 | 12 | 67   | 84 | 86 | 80 | 72 | 66 | 62 | 58 | 55 | 49 | 43 | 36 | 29 | 20 |
| Norway                    | 69     | 81 | 70 | 65 | 65 | 63 | 59 | 51 | 44 | 35 | 27 | 20 | 14 | 7  | 73   | 88 | 88 | 80 | 71 | 63 | 59 | 52 | 49 | 43 | 35 | 28 | 20 | 12 |
| Portugal                  | 42     | 51 | 50 | 48 | 48 | 46 | 41 | 36 | 31 | 27 | 20 | 16 | 11 | 7  | 57   | 81 | 83 | 79 | 74 | 71 | 68 | 63 | 61 | 55 | 50 | 43 | 37 | 27 |
| San Marino                | 64     | 75 | 67 | 62 | 61 | 59 | 54 | 47 | 40 | 34 | 27 | 21 | 16 | 10 | 71   | 87 | 87 | 81 | 71 | 65 | 61 | 56 | 53 | 48 | 42 | 36 | 30 | 22 |
| Spain                     | 57     | 66 | 58 | 55 | 54 | 53 | 48 | 39 | 32 | 26 | 20 | 15 | 11 | 7  | 64   | 81 | 84 | 79 | 72 | 68 | 64 | 59 | 55 | 49 | 41 | 34 | 26 | 17 |
| Sweden                    | 65     | 81 | 71 | 67 | 68 | 67 | 62 | 55 | 48 | 41 | 32 | 24 | 18 | 10 | 68   | 89 | 90 | 83 | 75 | 67 | 63 | 57 | 53 | 46 | 39 | 31 | 23 | 14 |
| Switzerland               | 60     | 76 | 69 | 64 | 63 | 62 | 57 | 51 | 43 | 37 | 29 | 23 | 18 | 11 | 66   | 87 | 88 | 83 | 75 | 69 | 65 | 60 | 57 | 51 | 45 | 38 | 31 | 21 |
| United Kingdom            | 70     | 77 | 70 | 66 | 66 | 64 | 60 | 54 | 46 | 39 | 30 | 23 | 17 | 9  | 70   | 86 | 86 | 82 | 74 | 69 | 65 | 61 | 58 | 53 | 47 | 39 | 31 | 22 |

Latin America and Caribbean

|                                    | Female |    |    |    |    |    |    |    |    |    |   |   |   |   | Male |    |    |    |    |    |    |    |    |    |    |    |    |    |
|------------------------------------|--------|----|----|----|----|----|----|----|----|----|---|---|---|---|------|----|----|----|----|----|----|----|----|----|----|----|----|----|
| Andean Latin America               | 30     | 43 | 38 | 33 | 27 | 23 | 19 | 14 | 11 | 9  | 6 | 4 | 3 | 2 | 47   | 76 | 79 | 75 | 69 | 62 | 55 | 47 | 41 | 36 | 30 | 24 | 17 | 10 |
| Bolivia (Plurinational State of)   | 27     | 47 | 42 | 36 | 29 | 25 | 19 | 14 | 10 | 8  | 6 | 4 | 3 | 1 | 37   | 78 | 82 | 77 | 70 | 62 | 54 | 47 | 40 | 36 | 31 | 25 | 20 | 12 |
| Ecuador                            | 14     | 22 | 19 | 16 | 13 | 11 | 8  | 5  | 4  | 3  | 1 | 1 | 1 | 0 | 36   | 64 | 68 | 63 | 59 | 52 | 45 | 37 | 32 | 26 | 21 | 15 | 10 | 4  |
| Peru                               | 41     | 52 | 46 | 40 | 34 | 29 | 24 | 18 | 15 | 12 | 8 | 6 | 4 | 2 | 55   | 82 | 84 | 80 | 74 | 66 | 59 | 52 | 46 | 41 | 34 | 27 | 20 | 12 |
| Caribbean                          | 34     | 34 | 27 | 20 | 15 | 12 | 9  | 7  | 5  | 3  | 2 | 1 | 1 | 1 | 61   | 71 | 73 | 67 | 57 | 47 | 40 | 33 | 29 | 24 | 19 | 15 | 11 | 7  |
| Antigua and Barbuda                | 36     | 36 | 29 | 22 | 17 | 14 | 11 | 7  | 5  | 4  | 2 | 2 | 1 | 1 | 62   | 70 | 73 | 68 | 58 | 49 | 42 | 35 | 31 | 25 | 20 | 16 | 13 | 8  |
| Bahamas                            | 36     | 34 | 27 | 19 | 15 | 12 | 9  | 6  | 4  | 3  | 2 | 1 | 1 | 0 | 60   | 69 | 72 | 66 | 55 | 45 | 38 | 30 | 26 | 21 | 17 | 13 | 10 | 6  |
| Barbados                           | 36     | 40 | 35 | 28 | 23 | 19 | 17 | 12 | 9  | 6  | 4 | 3 | 2 | 1 | 63   | 63 | 66 | 62 | 56 | 49 | 45 | 39 | 35 | 30 | 25 | 21 | 17 | 12 |
| Belize                             | 22     | 33 | 28 | 21 | 16 | 13 | 9  | 6  | 4  | 2  | 1 | 1 | 1 | 0 | 44   | 66 | 70 | 64 | 55 | 47 | 39 | 32 | 28 | 23 | 18 | 13 | 10 | 6  |
| Bermuda                            | 47     | 52 | 46 | 36 | 29 | 24 | 19 | 15 | 11 | 8  | 5 | 3 | 3 | 1 | 73   | 89 | 89 | 84 | 74 | 64 | 57 | 49 | 44 | 37 | 31 | 25 | 21 | 14 |
| Cuba                               | 36     | 35 | 28 | 21 | 16 | 13 | 10 | 7  | 5  | 3  | 2 | 1 | 1 | 1 | 61   | 70 | 73 | 67 | 57 | 47 | 41 | 33 | 29 | 24 | 19 | 15 | 12 | 7  |
| Dominica                           | 35     | 37 | 33 | 24 | 19 | 16 | 12 | 9  | 6  | 4  | 3 | 2 | 1 | 1 | 63   | 74 | 76 | 71 | 60 | 51 | 44 | 37 | 32 | 27 | 22 | 18 | 14 | 9  |
| Dominican Republic                 | 42     | 42 | 34 | 26 | 19 | 16 | 11 | 9  | 6  | 4  | 2 | 1 | 1 | 1 | 65   | 74 | 76 | 69 | 58 | 48 | 40 | 31 | 27 | 21 | 16 | 12 | 9  | 5  |
| Grenada                            | 38     | 26 | 22 | 18 | 15 | 13 | 11 | 9  | 7  | 5  | 4 | 3 | 2 | 1 | 64   | 51 | 53 | 49 | 45 | 40 | 37 | 32 | 29 | 25 | 23 | 20 | 17 | 12 |
| Guyana                             | 29     | 32 | 28 | 19 | 14 | 11 | 8  | 5  | 3  | 2  | 1 | 1 | 1 | 0 | 63   | 76 | 79 | 74 | 65 | 54 | 46 | 37 | 30 | 23 | 19 | 15 | 11 | 7  |
| Haiti                              | 28     | 25 | 20 | 14 | 10 | 9  | 7  | 6  | 4  | 3  | 2 | 1 | 1 | 1 | 60   | 71 | 73 | 67 | 57 | 49 | 42 | 36 | 31 | 28 | 22 | 18 | 14 | 9  |
| Jamaica                            | 26     | 34 | 25 | 17 | 12 | 8  | 6  | 3  | 2  | 1  | 1 | 1 | 0 | 0 | 54   | 72 | 73 | 66 | 54 | 43 | 36 | 28 | 24 | 19 | 15 | 11 | 8  | 5  |
| Puerto Rico                        | 37     | 35 | 31 | 22 | 18 | 12 | 10 | 7  | 4  | 2  | 1 | 1 | 1 | 0 | 54   | 63 | 67 | 61 | 53 | 45 | 38 | 30 | 27 | 23 | 18 | 15 | 12 | 7  |
| Saint Kitts and Nevis              | 33     | 31 | 23 | 15 | 11 | 9  | 7  | 5  | 4  | 3  | 2 | 1 | 1 | 0 | 59   | 53 | 54 | 47 | 36 | 27 | 22 | 17 | 15 | 12 | 10 | 8  | 6  | 4  |
| Saint Lucia                        | 49     | 54 | 48 | 38 | 32 | 30 | 25 | 18 | 13 | 9  | 6 | 4 | 3 | 2 | 64   | 72 | 75 | 70 | 62 | 53 | 47 | 40 | 36 | 30 | 25 | 21 | 17 | 11 |
| Saint Vincent and the Grenadines   | 52     | 53 | 43 | 35 | 27 | 22 | 17 | 13 | 9  | 6  | 4 | 3 | 2 | 1 | 76   | 95 | 94 | 87 | 74 | 63 | 55 | 46 | 41 | 34 | 28 | 23 | 18 | 12 |
| Suriname                           | 35     | 34 | 27 | 19 | 14 | 12 | 9  | 6  | 4  | 3  | 2 | 1 | 1 | 0 | 67   | 69 | 72 | 66 | 55 | 45 | 38 | 30 | 26 | 21 | 16 | 13 | 10 | 6  |
| Trinidad and Tobago                | 36     | 38 | 31 | 23 | 19 | 15 | 12 | 8  | 6  | 4  | 3 | 2 | 1 | 1 | 60   | 70 | 73 | 68 | 57 | 48 | 42 | 34 | 31 | 25 | 21 | 16 | 13 | 8  |
| United States Virgin Islands       | 40     | 43 | 32 | 24 | 20 | 16 | 15 | 11 | 10 | 8  | 6 | 5 | 4 | 3 | 69   | 75 | 77 | 70 | 58 | 46 | 41 | 34 | 31 | 26 | 23 | 18 | 15 | 11 |
| Central Latin America              | 24     | 29 | 23 | 17 | 12 | 9  | 7  | 5  | 3  | 3  | 1 | 1 | 1 | 0 | 40   | 59 | 63 | 61 | 56 | 50 | 43 | 37 | 31 | 26 | 20 | 16 | 12 | 7  |
| Colombia                           | 23     | 32 | 27 | 19 | 14 | 11 | 6  | 4  | 3  | 2  | 1 | 1 | 0 | 0 | 39   | 56 | 60 | 57 | 52 | 46 | 35 | 29 | 25 | 19 | 14 | 10 | 7  | 3  |
| Costa Rica                         | 34     | 34 | 28 | 20 | 14 | 11 | 8  | 6  | 4  | 3  | 2 | 1 | 1 | 0 | 51   | 60 | 64 | 62 | 59 | 52 | 44 | 37 | 32 | 27 | 21 | 17 | 13 | 7  |
| El Salvador                        | 7      | 11 | 9  | 6  | 5  | 3  | 3  | 2  | 1  | 1  | 1 | 0 | 0 | 0 | 38   | 57 | 62 | 60 | 54 | 47 | 40 | 32 | 28 | 22 | 17 | 13 | 9  | 5  |
| Guatemala                          | 8      | 13 | 11 | 8  | 6  | 4  | 3  | 2  | 2  | 1  | 1 | 1 | 0 | 0 | 30   | 48 | 52 | 49 | 45 | 38 | 32 | 24 | 20 | 16 | 12 | 9  | 7  | 4  |
| Honduras                           | 7      | 8  | 6  | 5  | 4  | 3  | 3  | 2  | 2  | 2  | 1 | 1 | 0 | 0 | 18   | 39 | 44 | 42 | 39 | 34 | 30 | 25 | 21 | 18 | 15 | 11 | 9  | 5  |
| Mexico                             | 30     | 35 | 26 | 19 | 13 | 10 | 8  | 5  | 4  | 3  | 2 | 1 | 1 | 0 | 43   | 64 | 68 | 65 | 60 | 54 | 48 | 42 | 36 | 30 | 24 | 19 | 15 | 10 |
| Nicaragua                          | 20     | 24 | 20 | 14 | 10 | 7  | 6  | 4  | 3  | 2  | 1 | 1 | 1 | 0 | 39   | 58 | 63 | 61 | 56 | 49 | 42 | 35 | 30 | 24 | 19 | 14 | 11 | 6  |
| Panama                             | 20     | 25 | 21 | 16 | 12 | 10 | 7  | 5  | 4  | 3  | 2 | 1 | 1 | 0 | 41   | 61 | 65 | 63 | 59 | 53 | 47 | 40 | 35 | 30 | 24 | 19 | 15 | 9  |
| Venezuela (Bolivarian Republic of) | 20     | 24 | 20 | 14 | 10 | 8  | 6  | 4  | 3  | 2  | 1 | 1 | 1 | 0 | 39   | 59 | 63 | 61 | 57 | 49 | 42 | 35 | 30 | 25 | 19 | 15 | 11 | 6  |
| Tropical Latin America             | 39     | 41 | 39 | 28 | 22 | 18 | 14 | 10 | 8  | 6  | 4 | 3 | 2 | 2 | 46   | 60 | 63 | 62 | 59 | 51 | 45 | 39 | 34 | 28 | 23 | 19 | 15 | 11 |
| Brazil                             | 38     | 41 | 39 | 28 | 22 | 18 | 14 | 10 | 8  | 5  | 4 | 3 | 2 | 2 | 45   | 59 | 63 | 61 | 58 | 50 | 44 | 38 | 34 | 28 | 22 | 18 | 15 | 11 |
| Paraguay                           | 54     | 57 | 51 | 38 | 28 | 23 | 18 | 15 | 11 | 8  | 6 | 5 | 4 | 3 | 71   | 87 | 88 | 85 | 80 | 70 | 62 | 54 | 48 | 40 | 32 | 27 | 21 | 15 |



## South Asia

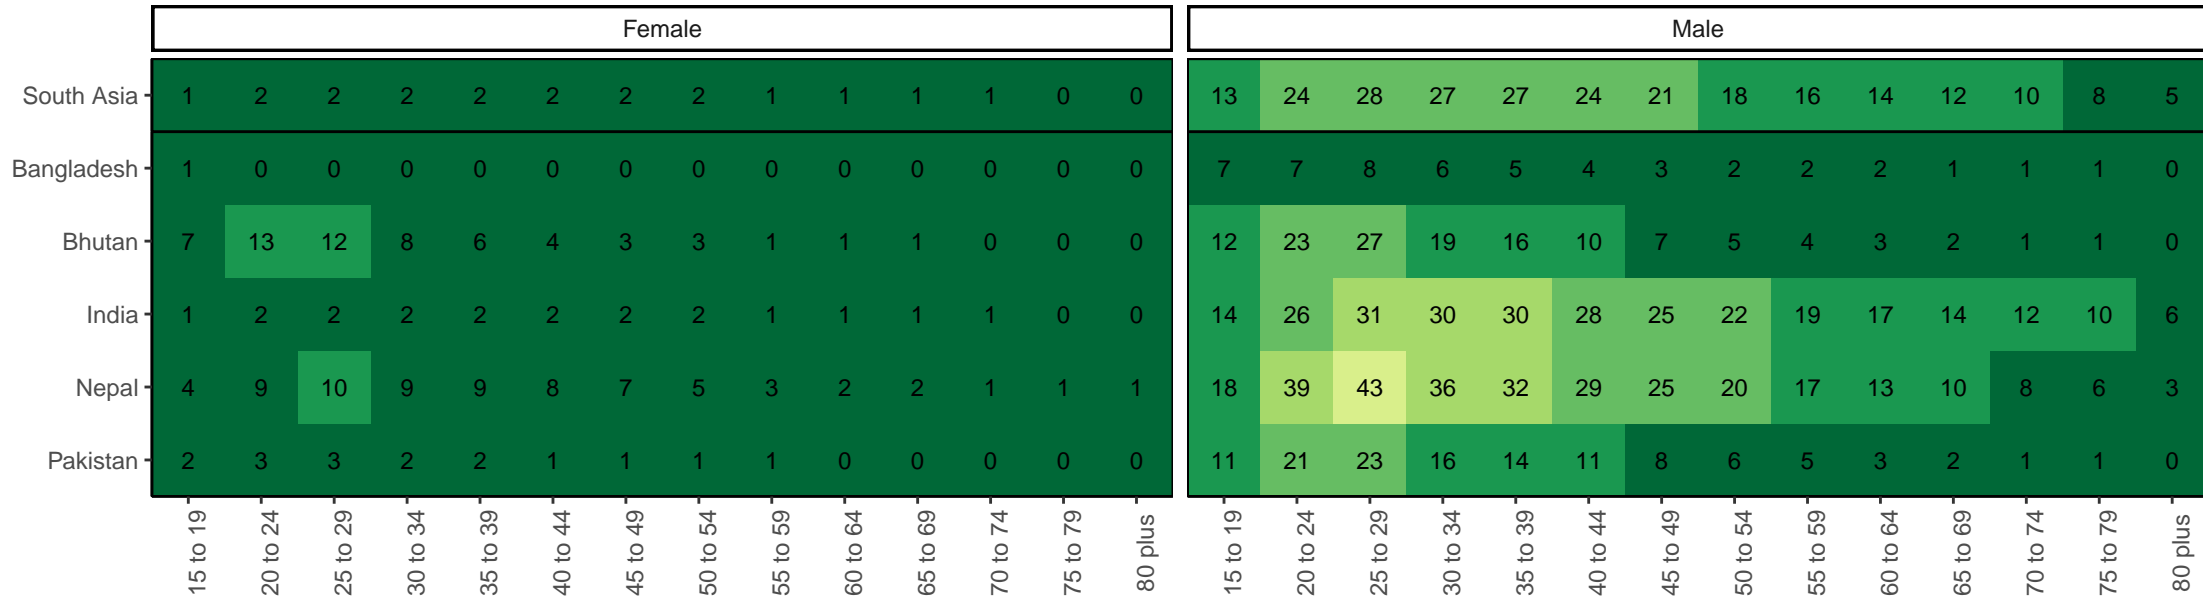

Southeast Asia, East Asia, and Oceania

|                                       | Female   |          |          |          |          |          |          |          |          |          |          |          |          |         | Male     |          |          |          |          |          |          |          |          |          |          |          |          |         |
|---------------------------------------|----------|----------|----------|----------|----------|----------|----------|----------|----------|----------|----------|----------|----------|---------|----------|----------|----------|----------|----------|----------|----------|----------|----------|----------|----------|----------|----------|---------|
| East Asia                             | 2        | 6        | 5        | 5        | 5        | 5        | 4        | 4        | 3        | 3        | 2        | 2        | 1        | 1       | 21       | 49       | 53       | 51       | 49       | 47       | 46       | 42       | 39       | 34       | 29       | 25       | 20       | 13      |
| China                                 | 2        | 6        | 5        | 5        | 5        | 5        | 4        | 4        | 3        | 3        | 2        | 2        | 1        | 1       | 20       | 49       | 53       | 51       | 49       | 47       | 47       | 42       | 39       | 34       | 29       | 25       | 20       | 13      |
| Democratic People's Republic of Korea | 2        | 6        | 5        | 5        | 4        | 4        | 3        | 3        | 2        | 2        | 1        | 1        | 1        | 0       | 20       | 48       | 50       | 45       | 41       | 39       | 37       | 32       | 29       | 25       | 21       | 17       | 13       | 7       |
| Taiwan (Province of China)            | 2        | 8        | 7        | 7        | 6        | 6        | 5        | 4        | 2        | 2        | 1        | 1        | 1        | 0       | 30       | 50       | 52       | 46       | 43       | 39       | 37       | 33       | 29       | 24       | 19       | 15       | 12       | 6       |
| Oceania                               | 6        | 6        | 4        | 3        | 2        | 1        | 1        | 1        | 0        | 0        | 0        | 0        | 0        | 0       | 22       | 31       | 28       | 20       | 15       | 11       | 9        | 6        | 5        | 4        | 4        | 3        | 3        | 2       |
| American Samoa                        | 9        | 12       | 4        | 2        | 1        | 0        | 0        | 0        | 0        | 0        | 0        | 0        | 0        | 0       | 28       | 45       | 30       | 13       | 7        | 4        | 3        | 1        | 1        | 1        | 0        | 0        | 0        | 0       |
| Cook Islands                          | 43       | 36       | 32       | 28       | 24       | 19       | 16       | 13       | 10       | 8        | 5        | 4        | 3        | 2       | 58       | 72       | 72       | 64       | 58       | 53       | 48       | 43       | 39       | 33       | 31       | 28       | 23       | 18      |
| Fiji                                  | 7        | 9        | 8        | 5        | 4        | 3        | 1        | 1        | 1        | 0        | 0        | 0        | 0        | 0       | 39       | 49       | 48       | 36       | 27       | 21       | 15       | 12       | 9        | 8        | 7        | 6        | 5        | 3       |
| Guam                                  | 20       | 31       | 19       | 11       | 6        | 5        | 3        | 2        | 1        | 1        | 0        | 0        | 0        | 0       | 45       | 66       | 58       | 41       | 32       | 25       | 22       | 16       | 13       | 11       | 11       | 9        | 6        | 4       |
| Kiribati                              | 4        | 8        | 4        | 2        | 2        | 1        | 1        | 0        | 0        | 0        | 0        | 0        | 0        | 0       | 19       | 34       | 28       | 15       | 9        | 5        | 4        | 3        | 2        | 1        | 1        | 1        | 1        | 0       |
| Marshall Islands                      | 6        | 6        | 4        | 3        | 2        | 1        | 1        | 1        | 0        | 0        | 0        | 0        | 0        | 0       | 31       | 42       | 38       | 28       | 21       | 16       | 13       | 9        | 7        | 6        | 6        | 5        | 4        | 3       |
| Micronesia (Federated States of)      | 12       | 17       | 10       | 6        | 3        | 2        | 1        | 1        | 0        | 0        | 0        | 0        | 0        | 0       | 34       | 53       | 46       | 30       | 22       | 16       | 13       | 9        | 7        | 6        | 5        | 4        | 3        | 2       |
| Nauru                                 | 21       | 23       | 14       | 10       | 8        | 5        | 4        | 3        | 2        | 1        | 1        | 1        | 1        | 0       | 45       | 62       | 57       | 44       | 36       | 30       | 26       | 21       | 19       | 16       | 15       | 13       | 10       | 7       |
| Niue                                  | 23       | 34       | 23       | 16       | 13       | 9        | 7        | 4        | 3        | 2        | 1        | 1        | 0        | 0       | 38       | 58       | 55       | 44       | 37       | 31       | 28       | 23       | 19       | 17       | 15       | 12       | 9        | 6       |
| Northern Mariana Islands              | 13       | 18       | 11       | 7        | 5        | 3        | 2        | 1        | 1        | 1        | 0        | 0        | 0        | 0       | 36       | 55       | 48       | 34       | 27       | 20       | 18       | 13       | 11       | 9        | 8        | 7        | 5        | 4       |
| Palau                                 | 12       | 35       | 22       | 14       | 9        | 7        | 5        | 3        | 2        | 1        | 1        | 1        | 1        | 0       | 36       | 71       | 60       | 39       | 29       | 21       | 18       | 13       | 10       | 9        | 9        | 7        | 6        | 4       |
| Papua New Guinea                      | 4        | 5        | 3        | 2        | 2        | 1        | 1        | 0        | 0        | 0        | 0        | 0        | 0        | 0       | 19       | 27       | 24       | 17       | 13       | 10       | 7        | 5        | 4        | 3        | 3        | 3        | 2        | 1       |
| Samoa                                 | 5        | 6        | 4        | 3        | 2        | 1        | 1        | 0        | 0        | 0        | 0        | 0        | 0        | 0       | 16       | 38       | 36       | 26       | 21       | 16       | 14       | 9        | 8        | 6        | 5        | 5        | 3        | 2       |
| Solomon Islands                       | 11       | 11       | 5        | 3        | 1        | 1        | 0        | 0        | 0        | 0        | 0        | 0        | 0        | 0       | 31       | 48       | 38       | 21       | 13       | 8        | 6        | 4        | 2        | 2        | 2        | 1        | 1        | 0       |
| Tokelau                               | 13       | 19       | 12       | 8        | 5        | 3        | 2        | 2        | 1        | 1        | 0        | 0        | 0        | 0       | 36       | 56       | 51       | 37       | 30       | 23       | 20       | 15       | 13       | 11       | 9        | 8        | 6        | 5       |
| Tonga                                 | 3        | 6        | 5        | 3        | 2        | 1        | 1        | 1        | 0        | 0        | 0        | 0        | 0        | 0       | 17       | 23       | 20       | 13       | 9        | 6        | 5        | 4        | 3        | 2        | 2        | 2        | 1        | 1       |
| Tuvalu                                | 14       | 16       | 9        | 5        | 3        | 2        | 1        | 1        | 0        | 0        | 0        | 0        | 0        | 0       | 48       | 52       | 45       | 29       | 21       | 15       | 12       | 9        | 7        | 5        | 5        | 4        | 3        | 2       |
| Vanuatu                               | 13       | 9        | 6        | 4        | 3        | 2        | 1        | 1        | 1        | 0        | 0        | 0        | 0        | 0       | 35       | 41       | 39       | 28       | 21       | 16       | 13       | 9        | 8        | 6        | 6        | 5        | 4        | 2       |
| Southeast Asia                        | 7        | 6        | 5        | 5        | 4        | 3        | 3        | 3        | 2        | 2        | 1        | 1        | 1        | 1       | 31       | 38       | 39       | 35       | 32       | 29       | 27       | 24       | 22       | 19       | 17       | 14       | 13       | 10      |
| Cambodia                              | 13       | 21       | 21       | 19       | 17       | 15       | 14       | 12       | 10       | 9        | 6        | 5        | 3        | 2       | 44       | 44       | 46       | 43       | 42       | 39       | 37       | 33       | 31       | 27       | 24       | 20       | 17       | 13      |
| Indonesia                             | 1        | 1        | 1        | 1        | 0        | 0        | 0        | 0        | 0        | 0        | 0        | 0        | 0        | 0       | 8        | 8        | 9        | 7        | 6        | 5        | 4        | 3        | 2        | 2        | 1        | 1        | 1        | 0       |
| Lao People's Democratic Republic      | 34       | 32       | 29       | 26       | 22       | 20       | 16       | 13       | 10       | 8        | 5        | 4        | 4        | 2       | 59       | 74       | 72       | 64       | 59       | 54       | 50       | 44       | 40       | 35       | 30       | 26       | 22       | 14      |
| Malaysia                              | 4        | 4        | 3        | 3        | 3        | 2        | 2        | 2        | 2        | 1        | 1        | 1        | 1        | 0       | 17       | 17       | 17       | 14       | 13       | 11       | 10       | 7        | 7        | 6        | 5        | 4        | 3        | 2       |
| Maldives                              | 5        | 3        | 2        | 1        | 1        | 1        | 0        | 0        | 0        | 0        | 0        | 0        | 0        | 0       | 20       | 36       | 33       | 22       | 17       | 13       | 11       | 8        | 6        | 4        | 3        | 2        | 2        | 1       |
| Mauritius                             | 14       | 11       | 8        | 6        | 4        | 4        | 3        | 2        | 2        | 1        | 1        | 1        | 1        | 0       | 51       | 61       | 58       | 47       | 42       | 38       | 35       | 30       | 28       | 25       | 21       | 17       | 15       | 10      |
| Myanmar                               | 2        | 1        | 2        | 1        | 1        | 1        | 1        | 0        | 0        | 0        | 0        | 0        | 0        | 0       | 24       | 40       | 45       | 40       | 38       | 34       | 30       | 26       | 21       | 17       | 15       | 13       | 10       | 8       |
| Philippines                           | 25       | 16       | 15       | 14       | 13       | 12       | 12       | 10       | 9        | 9        | 6        | 5        | 4        | 3       | 57       | 76       | 74       | 66       | 61       | 56       | 53       | 47       | 42       | 37       | 31       | 26       | 22       | 15      |
| Seychelles                            | 6        | 5        | 5        | 4        | 4        | 3        | 3        | 2        | 2        | 2        | 1        | 1        | 1        | 0       | 36       | 45       | 47       | 42       | 39       | 35       | 33       | 28       | 25       | 21       | 18       | 14       | 12       | 8       |
| Sri Lanka                             | 1        | 1        | 1        | 1        | 1        | 1        | 1        | 1        | 1        | 1        | 1        | 1        | 0        | 0       | 18       | 24       | 25       | 26       | 26       | 25       | 25       | 22       | 21       | 19       | 17       | 14       | 12       | 9       |
| Thailand                              | 7        | 6        | 6        | 5        | 5        | 4        | 4        | 3        | 3        | 3        | 2        | 2        | 1        | 1       | 43       | 48       | 51       | 47       | 44       | 41       | 39       | 34       | 31       | 27       | 23       | 19       | 16       | 12      |
| Timor-Leste                           | 2        | 2        | 2        | 1        | 1        | 2        | 2        | 2        | 2        | 2        | 1        | 1        | 1        | 0       | 22       | 25       | 27       | 25       | 23       | 23       | 26       | 23       | 22       | 19       | 16       | 13       | 11       | 7       |
| Viet Nam                              | 3        | 10       | 7        | 5        | 4        | 3        | 3        | 2        | 1        | 1        | 1        | 1        | 0        | 0       | 67       | 84       | 80       | 72       | 67       | 62       | 59       | 54       | 49       | 45       | 42       | 39       | 35       | 27      |
|                                       | 15 to 19 | 20 to 24 | 25 to 29 | 30 to 34 | 35 to 39 | 40 to 44 | 45 to 49 | 50 to 54 | 55 to 59 | 60 to 64 | 65 to 69 | 70 to 74 | 75 to 79 | 80 plus | 15 to 19 | 20 to 24 | 25 to 29 | 30 to 34 | 35 to 39 | 40 to 44 | 45 to 49 | 50 to 54 | 55 to 59 | 60 to 64 | 65 to 69 | 70 to 74 | 75 to 79 | 80 plus |



Sub-Saharan Africa

|                                  | Female   |          |          |          |          |          |          |          |          |          |          |          |          | Male    |          |          |          |          |          |          |          |          |          |          |          |          |          |         |
|----------------------------------|----------|----------|----------|----------|----------|----------|----------|----------|----------|----------|----------|----------|----------|---------|----------|----------|----------|----------|----------|----------|----------|----------|----------|----------|----------|----------|----------|---------|
|                                  | 15 to 19 | 20 to 24 | 25 to 29 | 30 to 34 | 35 to 39 | 40 to 44 | 45 to 49 | 50 to 54 | 55 to 59 | 60 to 64 | 65 to 69 | 70 to 74 | 75 to 79 | 80 plus | 15 to 19 | 20 to 24 | 25 to 29 | 30 to 34 | 35 to 39 | 40 to 44 | 45 to 49 | 50 to 54 | 55 to 59 | 60 to 64 | 65 to 69 | 70 to 74 | 75 to 79 | 80 plus |
| Central Sub-Saharan Africa       | 13       | 22       | 23       | 20       | 17       | 15       | 13       | 11       | 9        | 7        | 6        | 5        | 4        | 3       | 22       | 46       | 53       | 51       | 48       | 41       | 35       | 29       | 26       | 23       | 21       | 18       | 16       | 10      |
| Angola                           | 6        | 17       | 20       | 20       | 18       | 16       | 15       | 12       | 10       | 8        | 6        | 5        | 4        | 3       | 16       | 45       | 53       | 56       | 54       | 49       | 44       | 40       | 36       | 32       | 28       | 24       | 20       | 15      |
| Central African Republic         | 13       | 22       | 22       | 19       | 15       | 13       | 11       | 9        | 7        | 6        | 5        | 4        | 3        | 2       | 22       | 45       | 51       | 48       | 44       | 35       | 30       | 23       | 21       | 17       | 15       | 13       | 11       | 7       |
| Congo                            | 43       | 46       | 44       | 39       | 33       | 28       | 25       | 20       | 17       | 13       | 12       | 11       | 10       | 7       | 50       | 60       | 66       | 62       | 57       | 51       | 48       | 41       | 38       | 33       | 32       | 29       | 28       | 20      |
| Democratic Republic of the Congo | 13       | 22       | 22       | 19       | 16       | 13       | 12       | 9        | 8        | 6        | 5        | 5        | 4        | 3       | 23       | 45       | 52       | 49       | 45       | 37       | 31       | 25       | 23       | 19       | 17       | 14       | 13       | 8       |
| Equatorial Guinea                | 14       | 24       | 25       | 23       | 20       | 19       | 17       | 16       | 13       | 12       | 10       | 10       | 9        | 7       | 26       | 50       | 57       | 56       | 53       | 49       | 45       | 41       | 38       | 35       | 33       | 30       | 28       | 21      |
| Gabon                            | 14       | 24       | 24       | 23       | 21       | 20       | 19       | 16       | 14       | 13       | 11       | 11       | 10       | 7       | 27       | 51       | 58       | 57       | 55       | 51       | 47       | 43       | 41       | 37       | 35       | 33       | 31       | 23      |
| Eastern Sub-Saharan Africa       | 13       | 16       | 16       | 14       | 13       | 12       | 12       | 10       | 9        | 9        | 8        | 6        | 4        | 4       | 26       | 41       | 45       | 39       | 38       | 35       | 33       | 30       | 29       | 26       | 24       | 21       | 19       | 13      |
| Burundi                          | 6        | 12       | 12       | 11       | 11       | 10       | 10       | 8        | 7        | 6        | 5        | 4        | 3        | 3       | 24       | 42       | 48       | 44       | 44       | 42       | 39       | 36       | 34       | 31       | 28       | 24       | 21       | 15      |
| Comoros                          | 8        | 2        | 2        | 1        | 1        | 1        | 1        | 1        | 1        | 1        | 1        | 1        | 0        | 0       | 17       | 6        | 7        | 6        | 6        | 5        | 5        | 4        | 4        | 3        | 3        | 3        | 2        | 2       |
| Djibouti                         | 5        | 7        | 7        | 4        | 3        | 2        | 2        | 1        | 1        | 0        | 0        | 0        | 0        | 0       | 15       | 29       | 32       | 20       | 16       | 10       | 7        | 5        | 3        | 2        | 1        | 1        | 1        | 0       |
| Eritrea                          | 13       | 15       | 15       | 8        | 7        | 4        | 3        | 3        | 1        | 1        | 1        | 1        | 0        | 0       | 26       | 39       | 44       | 34       | 31       | 25       | 22       | 18       | 15       | 13       | 11       | 9        | 7        | 4       |
| Ethiopia                         | 26       | 28       | 27       | 24       | 21       | 19       | 19       | 16       | 13       | 13       | 11       | 8        | 6        | 4       | 44       | 52       | 54       | 46       | 44       | 41       | 38       | 35       | 34       | 30       | 27       | 23       | 20       | 14      |
| Kenya                            | 4        | 8        | 8        | 7        | 7        | 7        | 7        | 8        | 6        | 9        | 8        | 5        | 3        | 3       | 18       | 48       | 55       | 51       | 50       | 46       | 44       | 41       | 41       | 38       | 36       | 29       | 24       | 18      |
| Madagascar                       | 7        | 11       | 11       | 9        | 8        | 7        | 6        | 5        | 4        | 4        | 3        | 2        | 2        | 1       | 20       | 36       | 41       | 34       | 32       | 28       | 25       | 21       | 19       | 15       | 13       | 11       | 9        | 6       |
| Malawi                           | 2        | 3        | 3        | 3        | 3        | 3        | 4        | 3        | 3        | 4        | 3        | 2        | 2        | 2       | 12       | 32       | 38       | 36       | 33       | 31       | 28       | 26       | 24       | 20       | 17       | 15       | 14       | 10      |
| Mozambique                       | 15       | 23       | 22       | 16       | 14       | 11       | 10       | 8        | 6        | 5        | 3        | 2        | 2        | 1       | 32       | 57       | 59       | 48       | 43       | 36       | 32       | 27       | 24       | 19       | 17       | 13       | 11       | 7       |
| Rwanda                           | 22       | 27       | 26       | 24       | 22       | 21       | 20       | 17       | 14       | 12       | 9        | 7        | 6        | 4       | 45       | 52       | 57       | 53       | 51       | 49       | 47       | 44       | 41       | 36       | 32       | 28       | 24       | 18      |
| Somalia                          | 3        | 3        | 3        | 1        | 1        | 0        | 0        | 0        | 0        | 0        | 0        | 0        | 0        | 0       | 6        | 13       | 14       | 6        | 4        | 1        | 1        | 0        | 0        | 0        | 0        | 0        | 0        | 0       |
| South Sudan                      | 5        | 7        | 7        | 4        | 3        | 2        | 2        | 1        | 1        | 1        | 0        | 0        | 0        | 0       | 15       | 28       | 32       | 20       | 16       | 10       | 7        | 5        | 3        | 2        | 1        | 1        | 1        | 0       |
| Uganda                           | 15       | 18       | 18       | 17       | 17       | 16       | 17       | 14       | 13       | 13       | 10       | 7        | 5        | 4       | 30       | 41       | 47       | 45       | 45       | 44       | 43       | 40       | 38       | 35       | 30       | 25       | 21       | 16      |
| United Republic of Tanzania      | 4        | 10       | 10       | 11       | 11       | 13       | 13       | 12       | 12       | 13       | 11       | 10       | 8        | 6       | 7        | 22       | 26       | 27       | 28       | 29       | 28       | 28       | 26       | 25       | 26       | 26       | 23       | 17      |
| Zambia                           | 8        | 16       | 17       | 15       | 14       | 14       | 13       | 11       | 8        | 8        | 7        | 6        | 5        | 5       | 24       | 46       | 53       | 49       | 47       | 44       | 42       | 37       | 35       | 30       | 27       | 24       | 21       | 15      |
| Southern Sub-Saharan Africa      | 10       | 18       | 17       | 18       | 16       | 15       | 13       | 11       | 10       | 9        | 7        | 7        | 6        | 5       | 27       | 48       | 53       | 55       | 53       | 48       | 43       | 40       | 38       | 34       | 30       | 26       | 22       | 16      |
| Botswana                         | 15       | 17       | 17       | 13       | 10       | 11       | 9        | 7        | 6        | 5        | 3        | 3        | 2        | 2       | 22       | 39       | 44       | 43       | 41       | 36       | 32       | 28       | 24       | 20       | 16       | 14       | 11       | 8       |
| Eswatini                         | 5        | 7        | 8        | 8        | 7        | 7        | 7        | 6        | 5        | 6        | 5        | 5        | 5        | 5       | 15       | 28       | 34       | 33       | 32       | 29       | 28       | 26       | 24       | 22       | 20       | 18       | 15       | 12      |
| Lesotho                          | 15       | 23       | 22       | 22       | 19       | 17       | 14       | 11       | 9        | 7        | 5        | 4        | 3        | 2       | 29       | 51       | 58       | 60       | 57       | 50       | 44       | 38       | 34       | 28       | 23       | 19       | 15       | 10      |
| Namibia                          | 19       | 29       | 31       | 30       | 27       | 26       | 23       | 22       | 20       | 19       | 16       | 14       | 12       | 11      | 37       | 55       | 60       | 59       | 57       | 52       | 46       | 40       | 38       | 35       | 32       | 29       | 26       | 19      |
| South Africa                     | 11       | 21       | 19       | 20       | 18       | 17       | 14       | 12       | 11       | 10       | 8        | 7        | 6        | 5       | 27       | 48       | 53       | 55       | 53       | 48       | 44       | 41       | 39       | 35       | 31       | 27       | 23       | 16      |
| Zimbabwe                         | 5        | 7        | 7        | 7        | 7        | 6        | 5        | 4        | 4        | 4        | 3        | 3        | 2        | 2       | 26       | 50       | 58       | 60       | 58       | 51       | 43       | 37       | 33       | 29       | 26       | 22       | 19       | 13      |
| Western Sub-Saharan Africa       | 7        | 13       | 14       | 13       | 12       | 13       | 12       | 11       | 11       | 9        | 8        | 7        | 6        | 4       | 18       | 34       | 40       | 38       | 37       | 33       | 31       | 29       | 28       | 26       | 24       | 22       | 19       | 15      |
| Benin                            | 9        | 15       | 17       | 14       | 14       | 13       | 11       | 9        | 8        | 5        | 3        | 3        | 2        | 1       | 17       | 34       | 41       | 38       | 36       | 30       | 28       | 24       | 22       | 19       | 14       | 12       | 9        | 6       |
| Burkina Faso                     | 10       | 12       | 12       | 11       | 12       | 12       | 12       | 11       | 8        | 6        | 5        | 4        | 3        | 3       | 38       | 31       | 34       | 32       | 33       | 31       | 31       | 29       | 30       | 29       | 31       | 31       | 31       | 25      |
| Cabo Verde                       | 7        | 15       | 15       | 12       | 12       | 12       | 10       | 8        | 8        | 5        | 3        | 3        | 2        | 2       | 44       | 73       | 75       | 70       | 65       | 57       | 53       | 48       | 47       | 42       | 36       | 31       | 26       | 18      |
| Cameroon                         | 13       | 31       | 34       | 29       | 30       | 28       | 26       | 21       | 19       | 15       | 11       | 11       | 8        | 7       | 31       | 58       | 64       | 60       | 59       | 54       | 51       | 46       | 43       | 39       | 34       | 29       | 26       | 20      |
| Chad                             | 19       | 26       | 27       | 20       | 20       | 18       | 16       | 12       | 10       | 8        | 5        | 5        | 3        | 2       | 37       | 50       | 55       | 48       | 44       | 36       | 32       | 27       | 23       | 19       | 16       | 14       | 10       | 7       |
| Côte d'Ivoire                    | 12       | 20       | 20       | 17       | 17       | 16       | 15       | 14       | 14       | 12       | 10       | 9        | 7        | 6       | 36       | 51       | 57       | 53       | 52       | 46       | 44       | 40       | 40       | 38       | 35       | 32       | 28       | 22      |
| Gambia                           | 7        | 13       | 13       | 11       | 11       | 11       | 10       | 8        | 8        | 6        | 4        | 4        | 3        | 2       | 18       | 36       | 42       | 39       | 37       | 32       | 30       | 27       | 26       | 23       | 20       | 17       | 15       | 10      |
| Ghana                            | 13       | 21       | 21       | 18       | 17       | 16       | 14       | 11       | 10       | 8        | 6        | 6        | 4        | 3       | 21       | 43       | 52       | 50       | 49       | 44       | 42       | 38       | 37       | 33       | 28       | 24       | 21       | 15      |
| Guinea                           | 1        | 2        | 2        | 2        | 2        | 2        | 2        | 1        | 1        | 1        | 1        | 1        | 0        | 0       | 16       | 32       | 37       | 33       | 30       | 24       | 21       | 18       | 17       | 14       | 11       | 9        | 7        | 4       |
| Guinea-Bissau                    | 7        | 14       | 16       | 15       | 15       | 15       | 14       | 10       | 9        | 7        | 5        | 5        | 3        | 2       | 15       | 33       | 40       | 39       | 38       | 33       | 31       | 27       | 26       | 23       | 20       | 17       | 14       | 10      |
| Liberia                          | 10       | 20       | 20       | 17       | 17       | 16       | 16       | 12       | 11       | 8        | 6        | 5        | 4        | 3       | 22       | 46       | 49       | 47       | 43       | 38       | 36       | 30       | 28       | 25       | 20       | 17       | 14       | 9       |
| Mali                             | 1        | 2        | 2        | 2        | 2        | 2        | 2        | 2        | 2        | 2        | 2        | 2        | 2        | 1       | 5        | 6        | 8        | 7        | 7        | 7        | 7        | 7        | 7        | 7        | 7        | 7        | 6        | 5       |
| Mauritania                       | 2        | 1        | 1        | 0        | 0        | 0        | 0        | 0        | 0        | 0        | 0        | 0        | 0        | 0       | 6        | 10       | 10       | 5        | 2        | 0        | 0        | 0        | 0        | 0        | 0        | 0        | 0        | 0       |
| Niger                            | 4        | 7        | 8        | 4        | 4        | 3        | 2        | 1        | 1        | 1        | 0        | 0        | 0        | 0       | 13       | 27       | 31       | 24       | 18       | 10       | 7        | 4        | 4        | 2        | 1        | 1        | 1        | 0       |
| Nigeria                          | 5        | 11       | 11       | 12       | 11       | 12       | 12       | 13       | 13       | 12       | 11       | 10       | 8        | 6       | 13       | 30       | 36       | 36       | 36       | 34       | 33       | 32       | 31       | 30       | 29       | 28       | 24       | 18      |
| Sao Tome and Principe            | 8        | 14       | 15       | 14       | 14       | 14       | 13       | 12       | 11       | 10       | 7        | 7        | 6        | 4       | 21       | 40       | 47       | 44       | 44       | 40       | 39       | 37       | 36       | 34       | 30       | 27       | 24       | 18      |
| Senegal                          | 4        | 8        | 8        | 5        | 5        | 4        | 3        | 2        | 1        | 1        | 0        | 0        | 0        | 0       | 19       | 29       | 33       | 26       | 21       | 13       | 10       | 7        | 6        | 4        | 3        | 2        | 1        | 1       |
| Sierra Leone                     | 1        | 6        | 7        | 7        | 7        | 7        | 7        | 7        | 7        | 6        | 4        | 4        | 3        | 2       | 6        | 22       | 27       | 27       | 27       | 25       | 25       | 25       | 24       | 21       | 18       | 16       | 13       | 10      |
| Togo                             | 15       | 17       | 19       | 15       | 15       | 14       | 12       | 10       | 10       | 6        | 4        | 4        | 3        | 2       | 23       | 33       | 37       | 34       | 32       | 27       | 24       | 22       | 21       | 17       | 14       | 11       | 9        | 6       |

Figure S2

A. Theoretical Minimum Risk Exposure Level

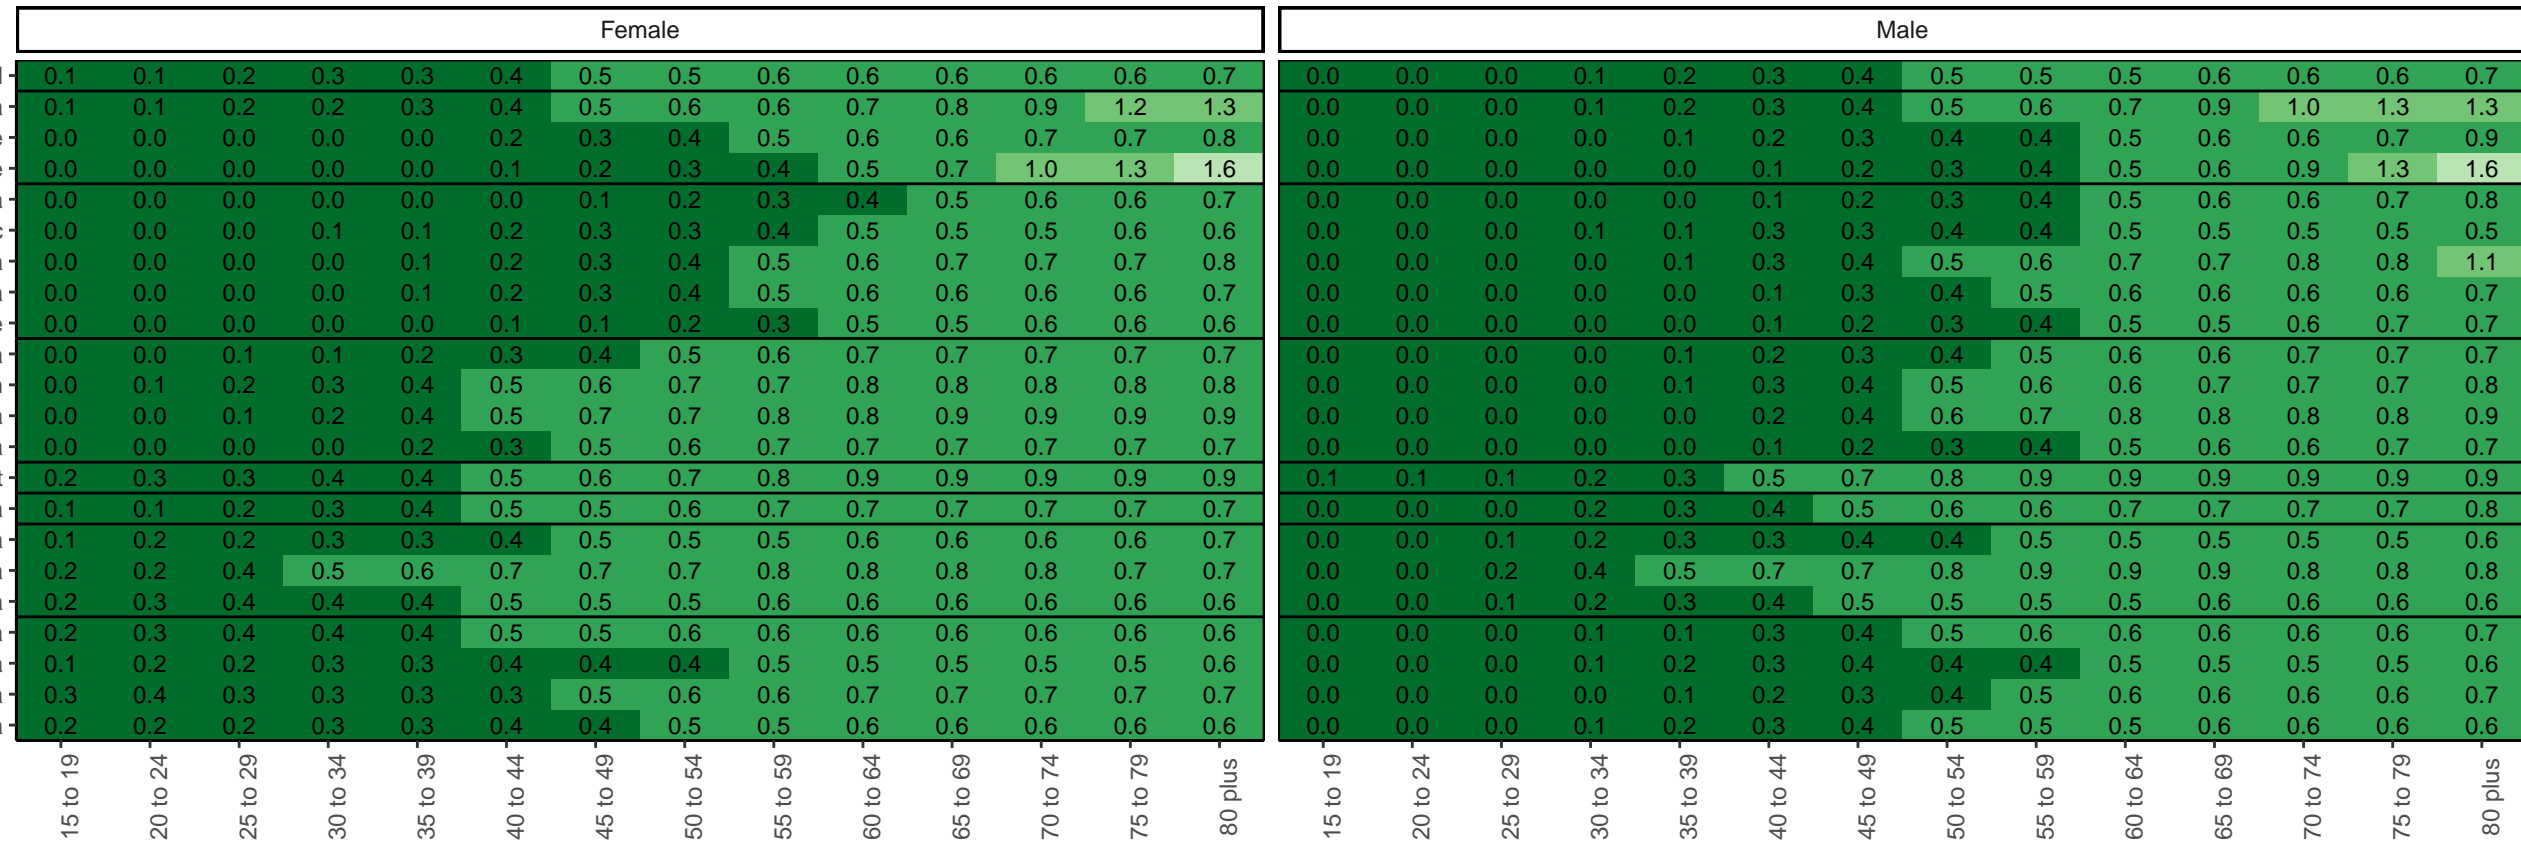

B. Non-Drinker Equivalence

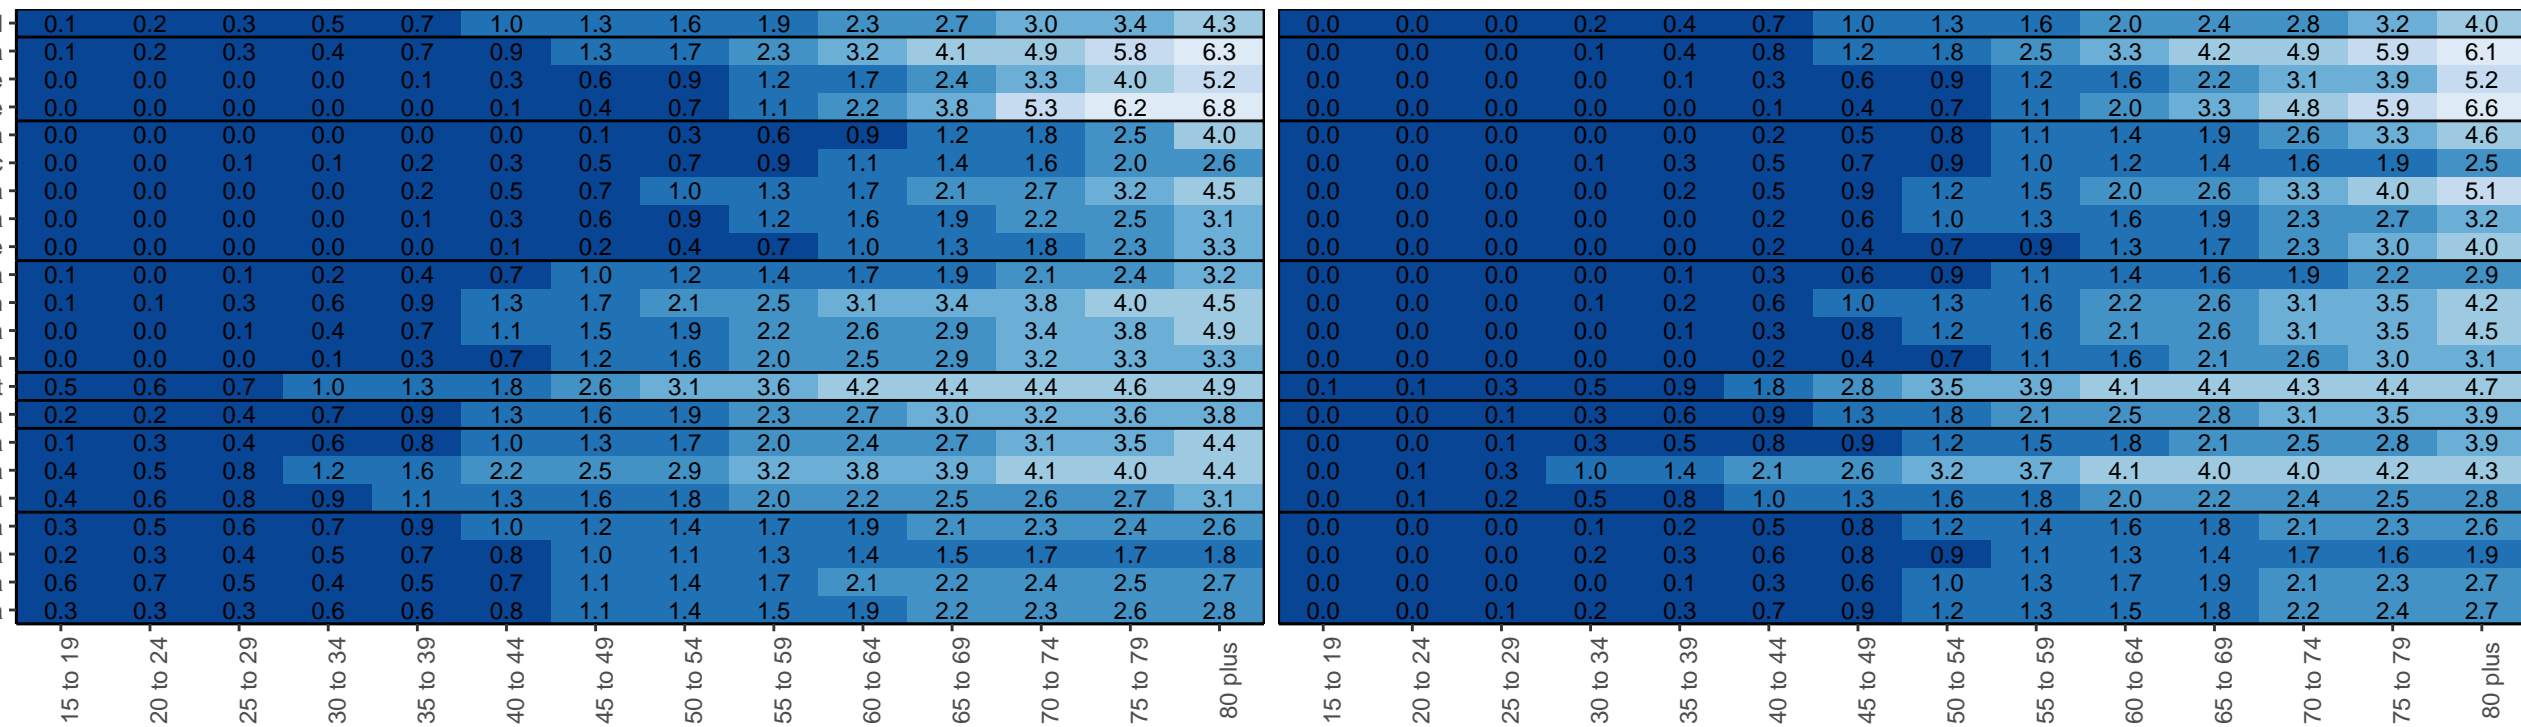

TMREL

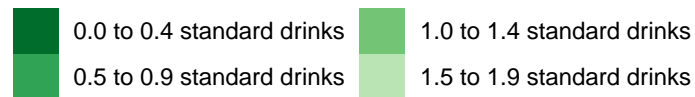

NDE

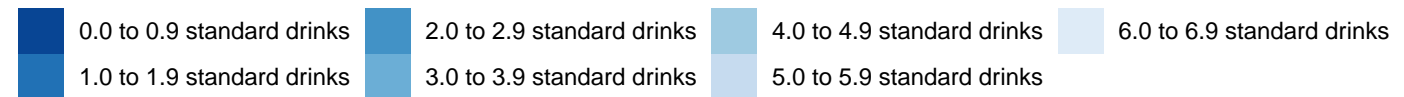



Figure S3

A. Theoretical Minimum Risk Exposure Level

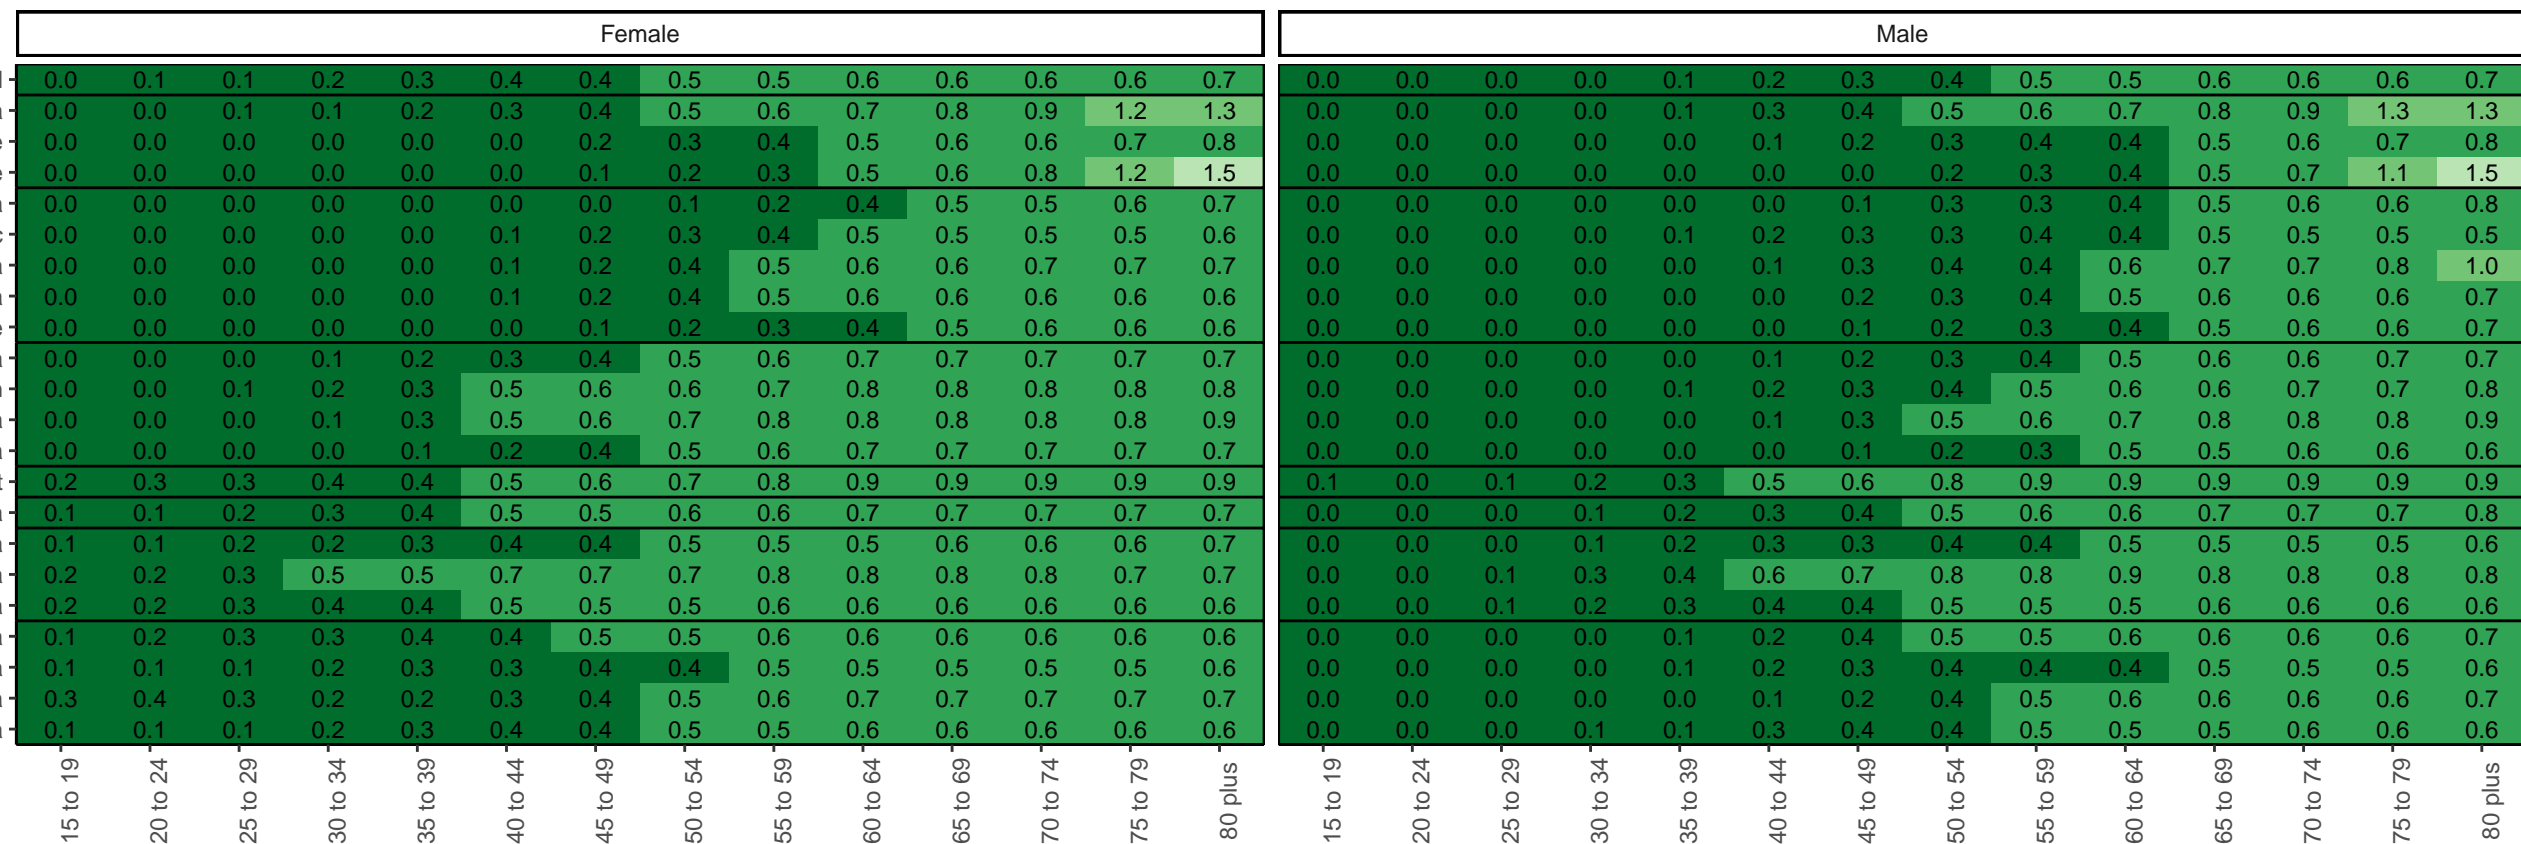

B. Non-Drinker Equivalence

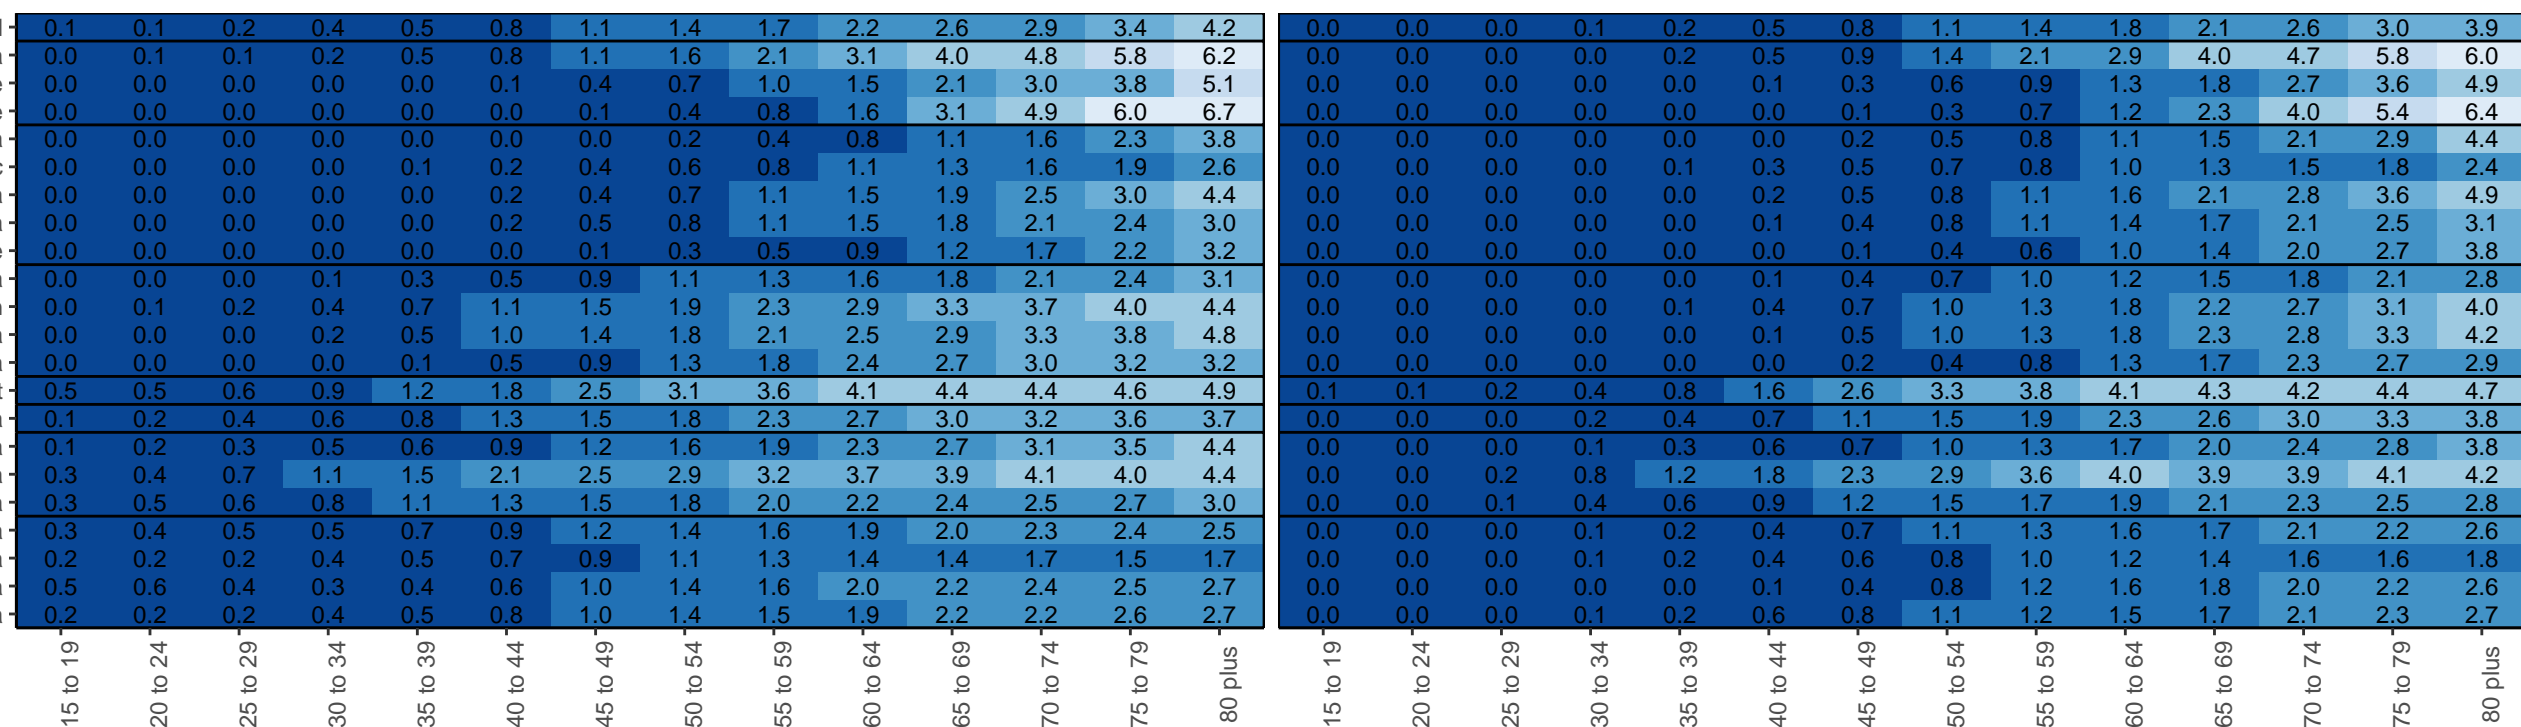

TMREL

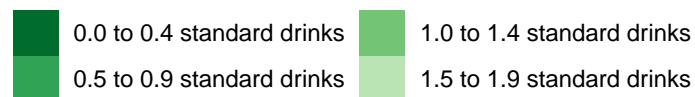

NDE

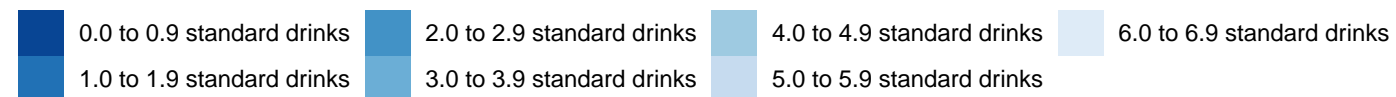

Figure S4

A. Theoretical Minimum Risk Exposure Level

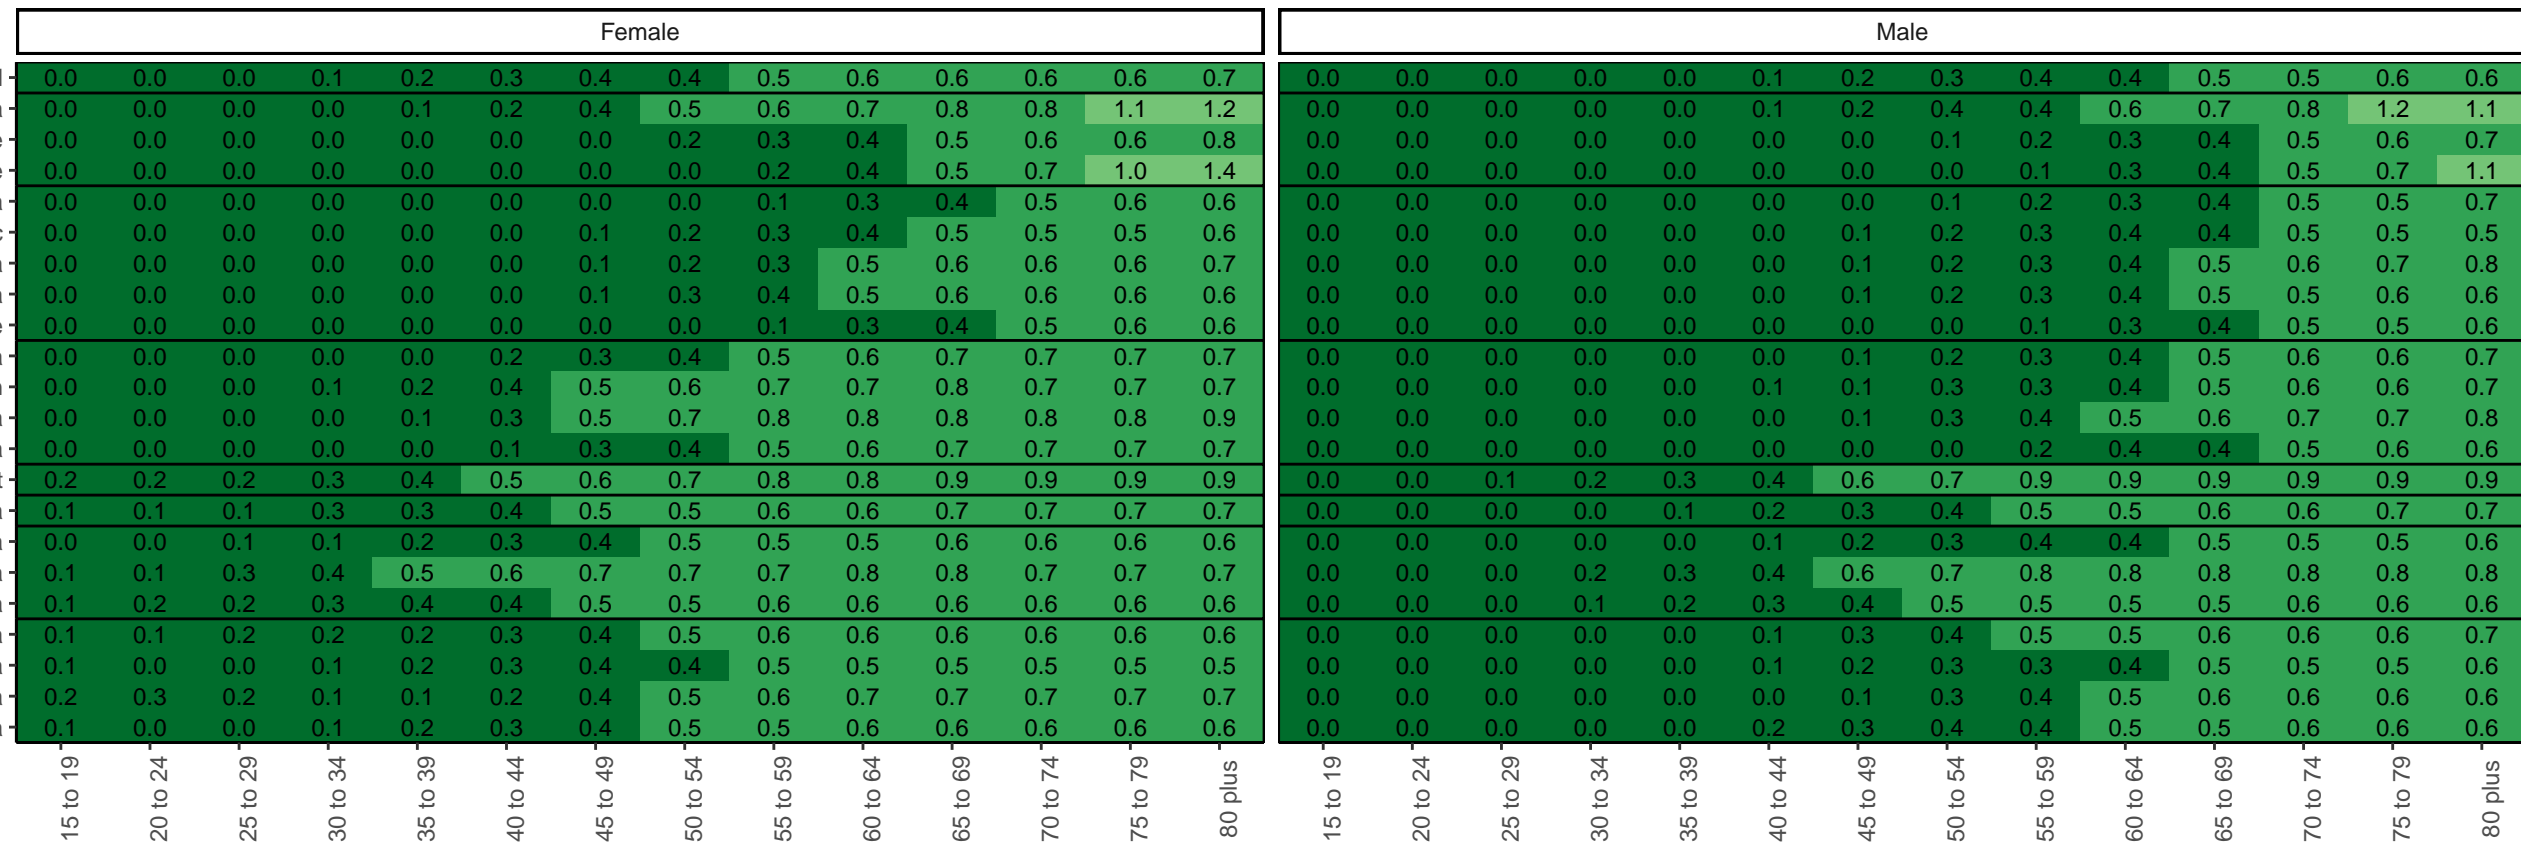

B. Non-Drinker Equivalence

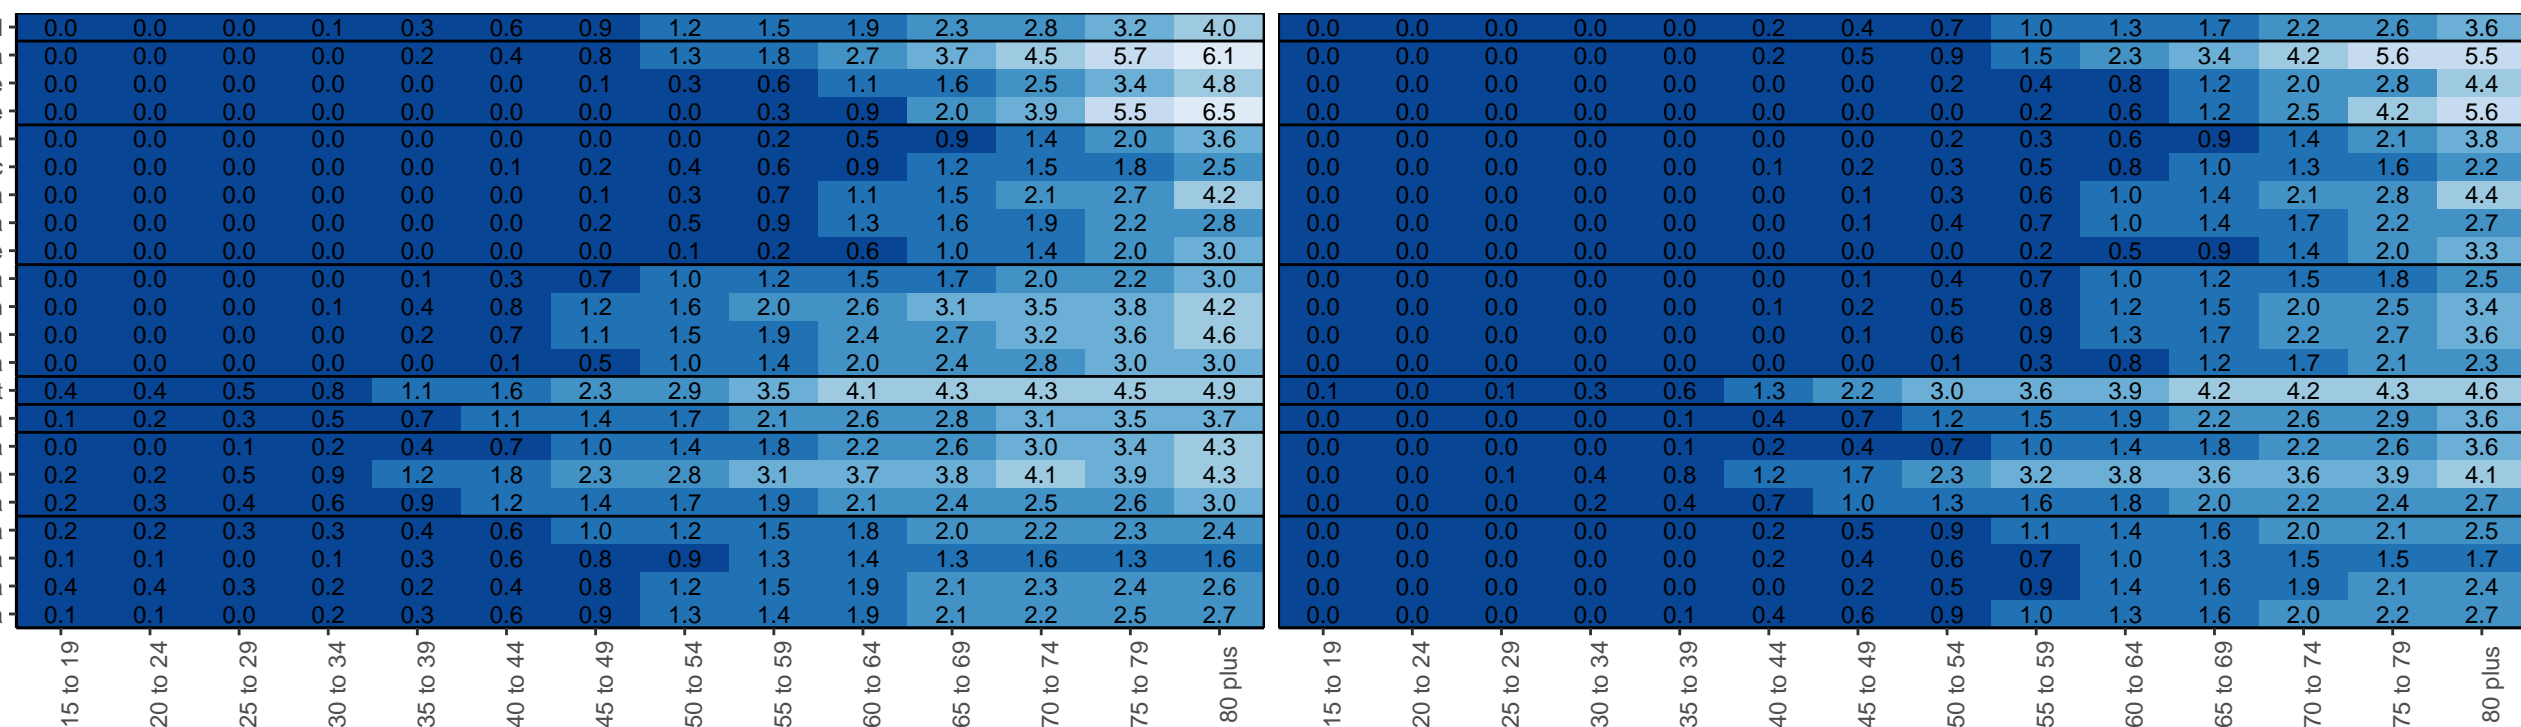

TMREL

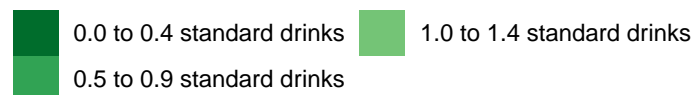

NDE

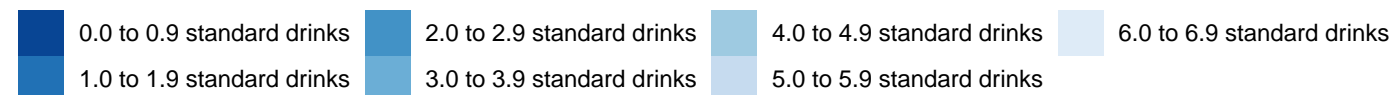

Figure S5

A. Theoretical Minimum Risk Exposure Level

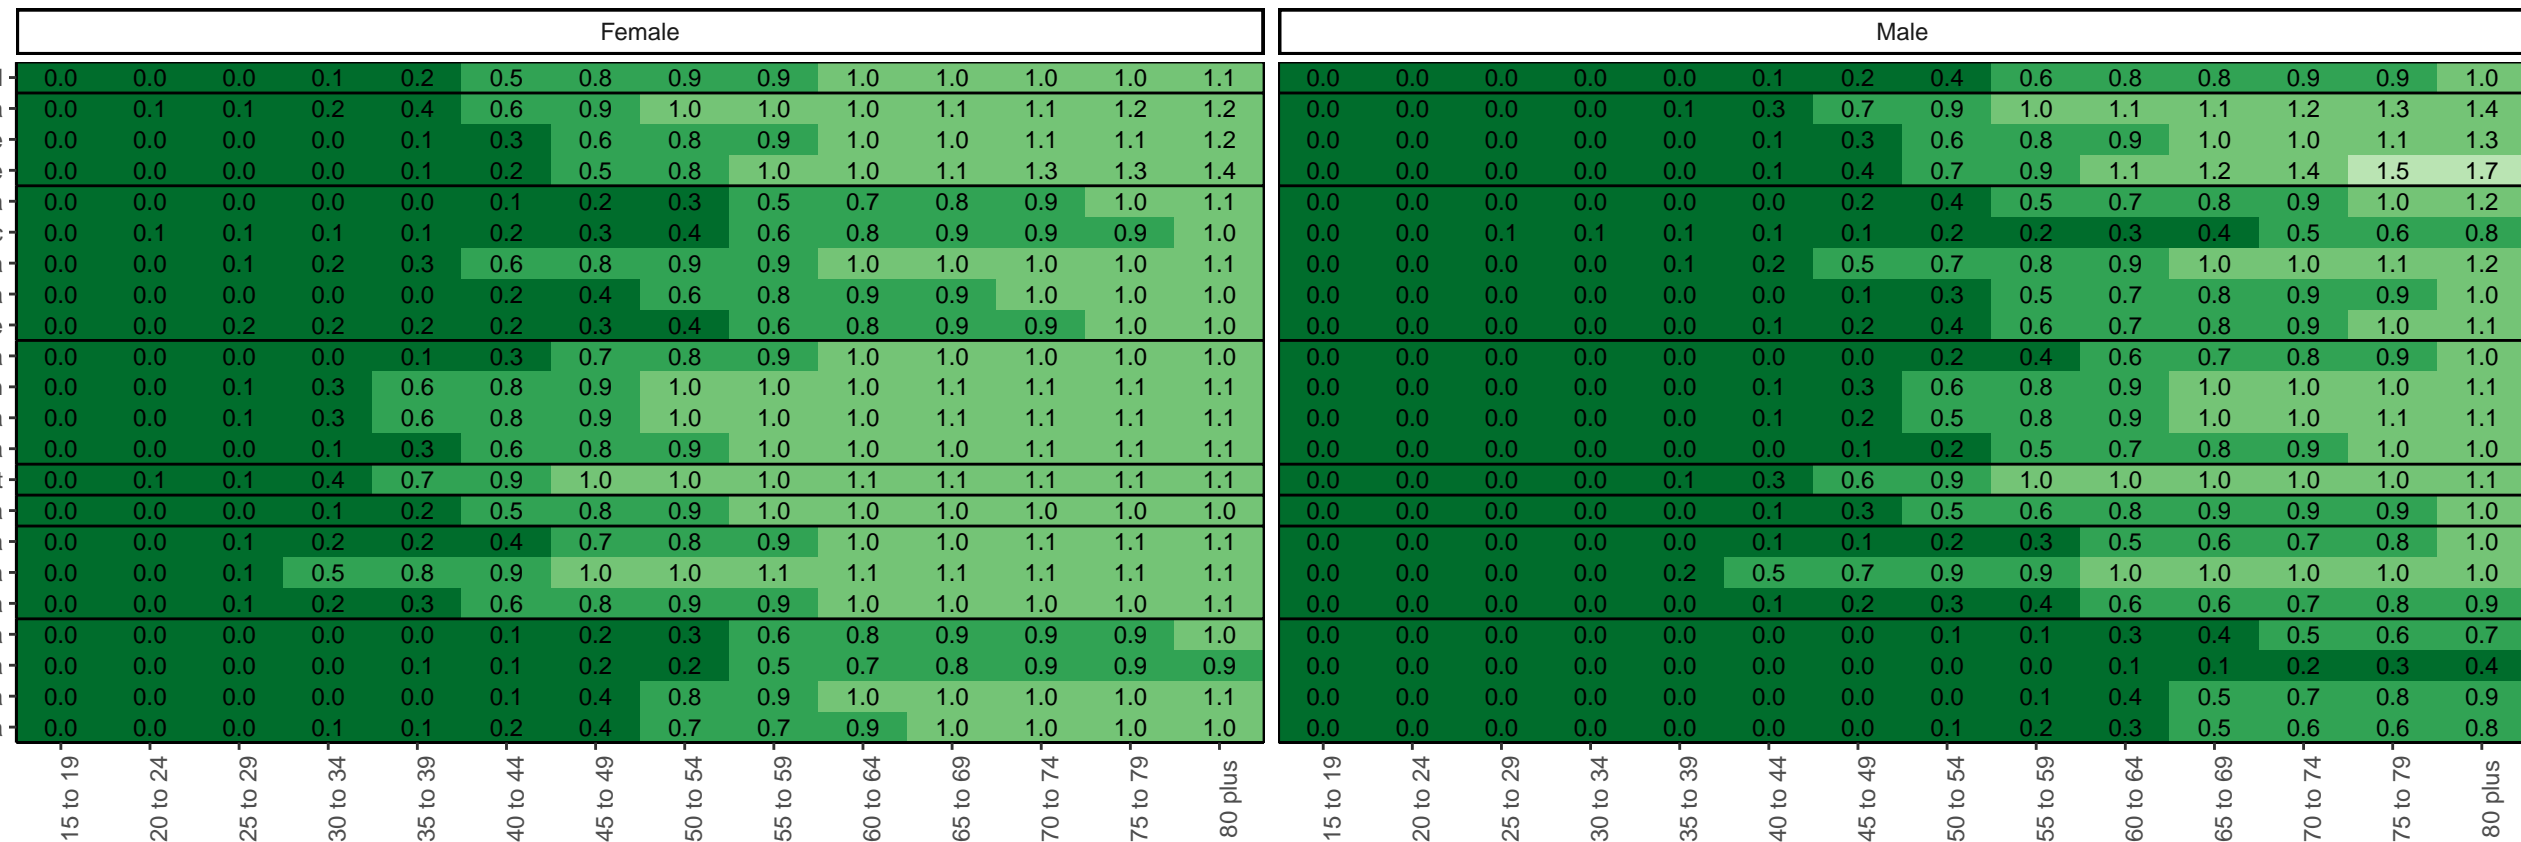

B. Non-Drinker Equivalence

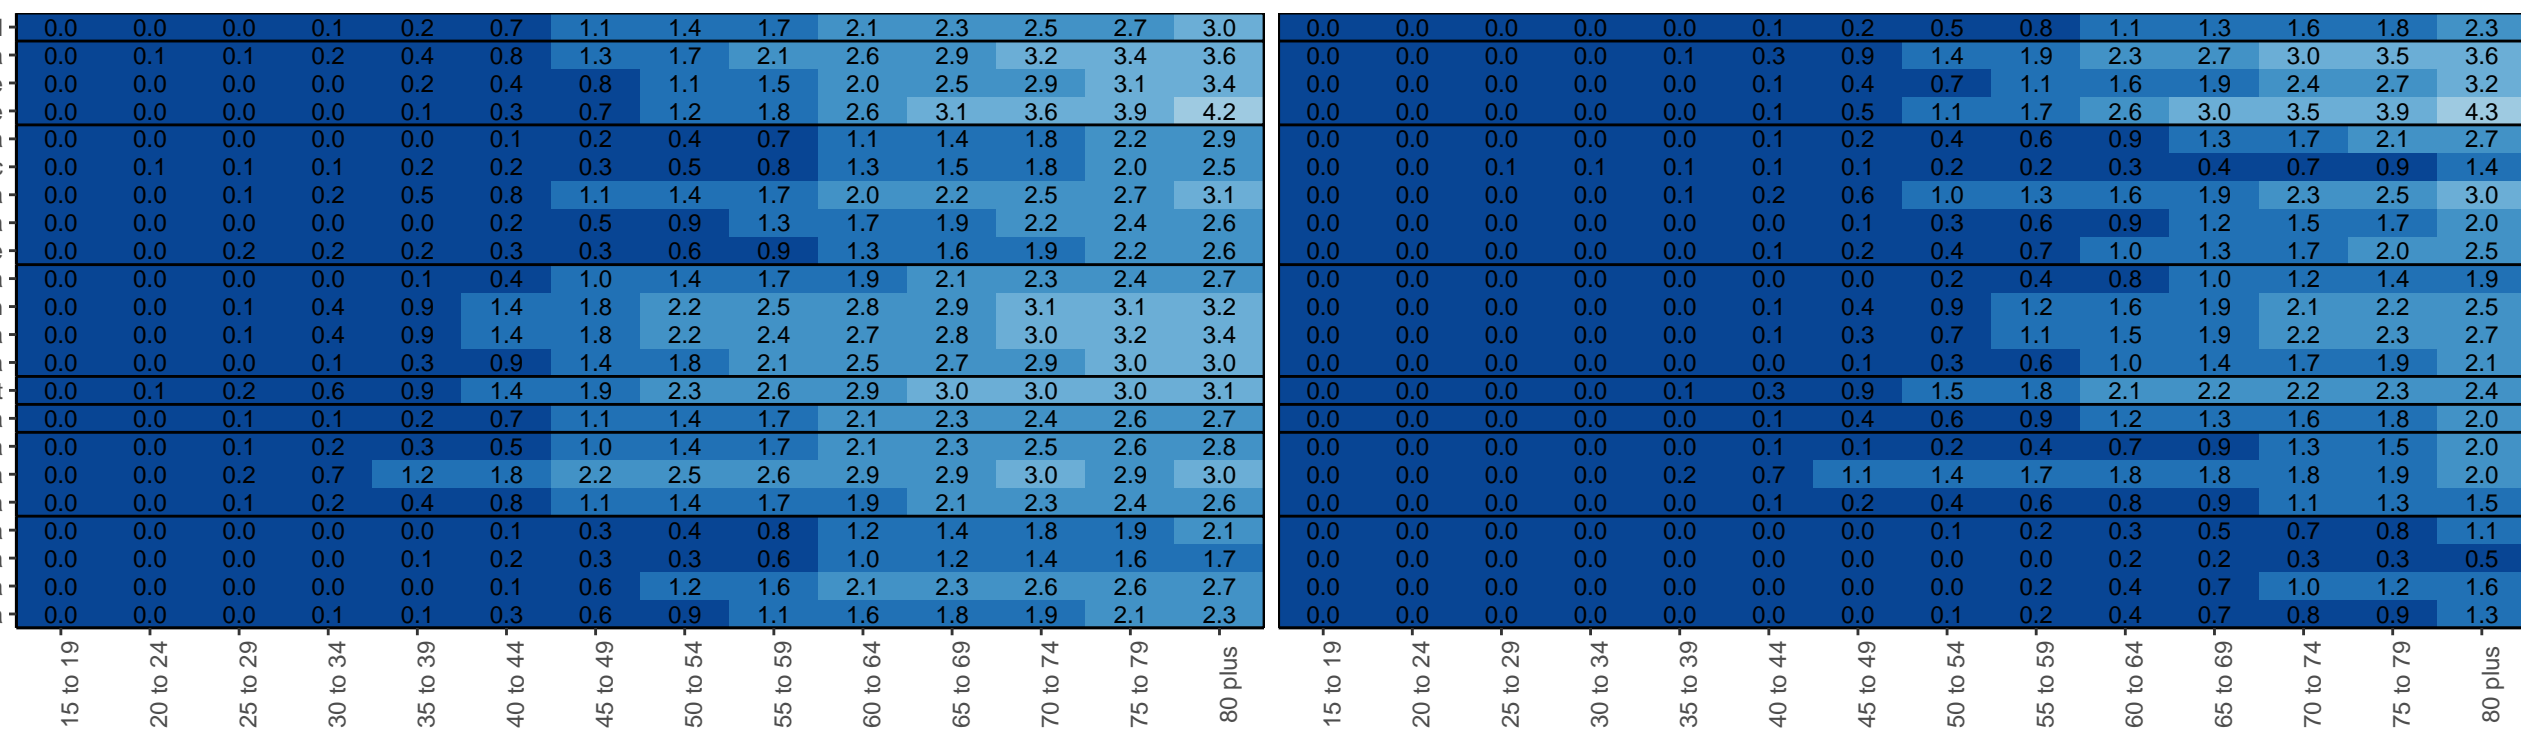

TMREL



NDE

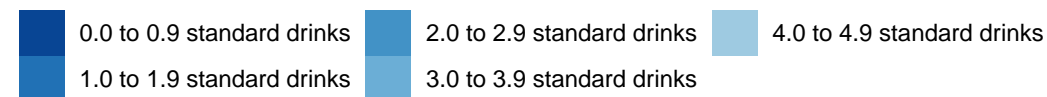

Supplementary Table 2

| Location     | Age Group | Female   |           | Male     |           |
|--------------|-----------|----------|-----------|----------|-----------|
|              |           | GBD 2016 | GBD 2020  | GBD 2016 | GBD 2020  |
|              |           | 0        | 0.09      | 0        | 0.01      |
| Global       | 15 to 19  | (0-0)    | (0-0.4)   | (0-0)    | (0-0.2)   |
|              |           | 0.01     | 0.15      | 0        | 0.02      |
| Global       | 20 to 24  | (0-0)    | (0-0.4)   | (0-0)    | (0-0.3)   |
|              |           | 0.02     | 0.24      | 0        | 0.06      |
| Global       | 25 to 29  | (0-0.5)  | (0-0.5)   | (0-0)    | (0-0.3)   |
|              |           | 0.06     | 0.32      | 0.01     | 0.21      |
| Global       | 30 to 34  | (0-1)    | (0-0.6)   | (0-0)    | (0-0.4)   |
|              |           | 0.15     | 0.38      | 0.01     | 0.31      |
| Global       | 35 to 39  | (0-1)    | (0.1-0.6) | (0-0)    | (0-0.6)   |
|              |           | 0.41     | 0.45      | 0.05     | 0.41      |
| Global       | 40 to 44  | (0-1)    | (0.3-0.7) | (0-1)    | (0.2-0.8) |
|              |           | 0.71     | 0.5       | 0.11     | 0.47      |
| Global       | 45 to 49  | (0-1)    | (0.4-0.7) | (0-1)    | (0.3-1)   |
|              |           | 0.85     | 0.55      | 0.22     | 0.52      |
| Global       | 50 to 54  | (0-1)    | (0.4-0.8) | (0-1)    | (0.4-1)   |
|              |           | 0.93     | 0.59      | 0.38     | 0.57      |
| Global       | 55 to 59  | (0.5-1)  | (0.4-0.9) | (0-1)    | (0.4-1)   |
|              |           | 0.97     | 0.62      | 0.6      | 0.6       |
| Global       | 60 to 64  | (0.5-1)  | (0.5-0.9) | (0-1)    | (0.4-1)   |
|              |           | 1        | 0.63      | 0.71     | 0.61      |
| Global       | 65 to 69  | (0.5-1)  | (0.5-1)   | (0-1)    | (0.5-1)   |
|              |           | 1.02     | 0.64      | 0.81     | 0.62      |
| Global       | 70 to 74  | (1-1.5)  | (0.5-1)   | (0-1)    | (0.5-1)   |
|              |           | 1.04     | 0.65      | 0.87     | 0.64      |
| Global       | 75 to 79  | (1-2)    | (0.5-1)   | (0-1)    | (0.5-1)   |
|              |           | 1.08     | 0.7       | 0.98     | 0.69      |
| Global       | 80 plus   | (1-2)    | (0.5-1.5) | (0.5-2)  | (0.5-1.7) |
|              |           | 0.04     | 0.11      | 0        | 0.02      |
| Central Asia | 15 to 19  | (0-1)    | (0-0.5)   | (0-0)    | (0-0.2)   |
|              |           | 0.06     | 0.22      | 0        | 0.04      |
| Central Asia | 20 to 24  | (0-1)    | (0-0.5)   | (0-0)    | (0-0.3)   |
|              |           | 0.11     | 0.29      | 0        | 0.09      |
| Central Asia | 25 to 29  | (0-1)    | (0-0.6)   | (0-0)    | (0-0.4)   |
|              |           | 0.19     | 0.34      | 0.02     | 0.22      |
| Central Asia | 30 to 34  | (0-1)    | (0-0.7)   | (0-0)    | (0-0.5)   |
|              |           | 0.32     | 0.4       | 0.07     | 0.35      |
| Central Asia | 35 to 39  | (0-1)    | (0-0.9)   | (0-1)    | (0-1)     |
|              |           | 0.53     | 0.47      | 0.19     | 0.47      |
| Central Asia | 40 to 44  | (0-1)    | (0.3-1)   | (0-1)    | (0.2-1)   |
|              |           | 0.8      | 0.54      | 0.41     | 0.57      |
| Central Asia | 45 to 49  | (0-1)    | (0.4-1)   | (0-1)    | (0.3-1)   |
|              |           | 0.94     | 0.59      | 0.66     | 0.67      |
| Central Asia | 50 to 54  | (0.5-1)  | (0.4-1)   | (0-1)    | (0.4-1)   |
|              |           | 0.98     | 0.67      | 0.84     | 0.75      |
| Central Asia | 55 to 59  | (0.5-1)  | (0.5-1)   | (0-1)    | (0.4-1.7) |
|              |           | 1.02     | 0.75      | 0.95     | 0.82      |
| Central Asia | 60 to 64  | (1-1.01) | (0.5-1)   | (0-1)    | (0.5-2)   |
|              |           | 1.05     | 0.85      | 1.01     | 0.94      |
| Central Asia | 65 to 69  | (1-2)    | (0.5-2)   | (0.5-2)  | (0.5-2)   |
|              |           | 1.09     | 0.92      | 1.07     | 1.02      |
| Central Asia | 70 to 74  | (1-2)    | (0.5-2)   | (0.5-2)  | (0.5-2.2) |
|              |           | 1.16     | 1.23      | 1.21     | 1.38      |
| Central Asia | 75 to 79  | (1-2)    | (0.5-2.6) | (1-3)    | (0.5-2.9) |
|              |           | 1.21     | 1.37      | 1.27     | 1.43      |
| Central Asia | 80 plus   | (1-3)    | (0.5-3)   | (1-3)    | (0.5-3)   |

|                |          |         |           |         |            |
|----------------|----------|---------|-----------|---------|------------|
|                |          | 0       | 0-01      | 0       | 0          |
| Central Europe | 15 to 19 | (0-0)   | (0-0-1)   | (0-0)   | (0-0)      |
|                |          | 0       | 0-04      | 0       | 0-01       |
| Central Europe | 20 to 24 | (0-0)   | (0-0-3)   | (0-0)   | (0-0)      |
|                |          | 0       | 0-12      | 0       | 0-02       |
| Central Europe | 25 to 29 | (0-0)   | (0-0-4)   | (0-0)   | (0-0-3)    |
|                |          | 0-02    | 0-19      | 0-01    | 0-11       |
| Central Europe | 30 to 34 | (0-0-5) | (0-0-4)   | (0-0)   | (0-0-4)    |
|                |          | 0-1     | 0-27      | 0-02    | 0-26       |
| Central Europe | 35 to 39 | (0-1)   | (0-0-5)   | (0-0)   | (0-0-7)    |
|                |          | 0-23    | 0-36      | 0-07    | 0-38       |
| Central Europe | 40 to 44 | (0-1)   | (0-0-7)   | (0-1)   | (0-0-9)    |
|                |          | 0-45    | 0-43      | 0-15    | 0-46       |
| Central Europe | 45 to 49 | (0-1)   | (0-2-0-8) | (0-1)   | (0-2-1)    |
|                |          | 0-64    | 0-5       | 0-25    | 0-51       |
| Central Europe | 50 to 54 | (0-1)   | (0-3-0-9) | (0-1)   | (0-3-1)    |
|                |          | 0-85    | 0-57      | 0-42    | 0-58       |
| Central Europe | 55 to 59 | (0-1)   | (0-4-0-9) | (0-1)   | (0-4-1)    |
|                |          | 0-95    | 0-62      | 0-68    | 0-63       |
| Central Europe | 60 to 64 | (0-5-1) | (0-5-1)   | (0-1)   | (0-4-1)    |
|                |          | 0-99    | 0-66      | 0-84    | 0-66       |
| Central Europe | 65 to 69 | (0-5-1) | (0-5-1)   | (0-1)   | (0-5-1)    |
|                |          | 1-05    | 0-68      | 0-93    | 0-69       |
| Central Europe | 70 to 74 | (1-2)   | (0-5-1)   | (0-5-1) | (0-5-1-21) |
|                |          | 1-1     | 0-7       | 1       | 0-73       |
| Central Europe | 75 to 79 | (1-2)   | (0-5-1-5) | (0-5-2) | (0-5-1-9)  |
|                |          | 1-19    | 0-87      | 1-17    | 0-92       |
| Central Europe | 80 plus  | (1-2)   | (0-5-2-4) | (0-5-3) | (0-5-2-5)  |
|                |          | 0       | 0-01      | 0-01    | 0-01       |
| Eastern Europe | 15 to 19 | (0-0)   | (0-0-2)   | (0-0)   | (0-0)      |
|                |          | 0       | 0-03      | 0-01    | 0-01       |
| Eastern Europe | 20 to 24 | (0-0)   | (0-0-3)   | (0-0)   | (0-0-1)    |
|                |          | 0-01    | 0-08      | 0-01    | 0-03       |
| Eastern Europe | 25 to 29 | (0-0)   | (0-0-4)   | (0-0)   | (0-0-3)    |
|                |          | 0-04    | 0-16      | 0-01    | 0-11       |
| Eastern Europe | 30 to 34 | (0-1)   | (0-0-5)   | (0-0)   | (0-0-4)    |
|                |          | 0-09    | 0-25      | 0-04    | 0-24       |
| Eastern Europe | 35 to 39 | (0-1)   | (0-0-6)   | (0-1)   | (0-0-7)    |
|                |          | 0-18    | 0-34      | 0-09    | 0-36       |
| Eastern Europe | 40 to 44 | (0-1)   | (0-0-7)   | (0-1)   | (0-1)      |
|                |          | 0-39    | 0-42      | 0-19    | 0-45       |
| Eastern Europe | 45 to 49 | (0-1)   | (0-2-0-8) | (0-1)   | (0-2-1)    |
|                |          | 0-68    | 0-48      | 0-44    | 0-53       |
| Eastern Europe | 50 to 54 | (0-1)   | (0-3-1)   | (0-1)   | (0-3-1)    |
|                |          | 0-93    | 0-57      | 0-73    | 0-62       |
| Eastern Europe | 55 to 59 | (0-5-1) | (0-4-1)   | (0-1)   | (0-4-1)    |
|                |          | 1       | 0-67      | 0-93    | 0-78       |
| Eastern Europe | 60 to 64 | (0-5-1) | (0-5-1)   | (0-1)   | (0-4-2)    |
|                |          | 1-08    | 0-82      | 1-05    | 0-96       |
| Eastern Europe | 65 to 69 | (1-2)   | (0-5-2)   | (0-5-2) | (0-5-2-3)  |
|                |          | 1-22    | 1-08      | 1-23    | 1-21       |
| Eastern Europe | 70 to 74 | (1-3)   | (0-5-2-5) | (0-5-3) | (0-5-2-7)  |
|                |          | 1-33    | 1-37      | 1-4     | 1-52       |
| Eastern Europe | 75 to 79 | (1-3)   | (0-5-3)   | (1-3)   | (0-5-3)    |
|                |          | 1-42    | 1-69      | 1-63    | 1-87       |
| Eastern Europe | 80 plus  | (1-3)   | (0-6-3-3) | (1-3)   | (0-5-3-3)  |
|                |          | 0       | 0         | 0       | 0-01       |
| Australasia    | 15 to 19 | (0-0)   | (0-0)     | (0-0)   | (0-0)      |
|                |          | 0       | 0         | 0-01    | 0-01       |
| Australasia    | 20 to 24 | (0-0)   | (0-0)     | (0-0)   | (0-0)      |
|                |          | 0       | 0-01      | 0-01    | 0-02       |
| Australasia    | 25 to 29 | (0-0)   | (0-0)     | (0-0)   | (0-0-2)    |

|                           |          |                 |                   |                   |                   |
|---------------------------|----------|-----------------|-------------------|-------------------|-------------------|
| Australasia               | 30 to 34 | 0-01<br>(0-0)   | 0-02<br>(0-0-3)   | 0-01<br>(0-0)     | 0-05<br>(0-0-4)   |
| Australasia               | 35 to 39 | 0-01<br>(0-0)   | 0-05<br>(0-0-4)   | 0-02<br>(0-0)     | 0-15<br>(0-0-6)   |
| Australasia               | 40 to 44 | 0-04<br>(0-0-5) | 0-11<br>(0-0-4)   | 0-03<br>(0-0-5-1) | 0-29<br>(0-0-8)   |
| Australasia               | 45 to 49 | 0-09<br>(0-1)   | 0-2<br>(0-0-5)    | 0-07<br>(0-1)     | 0-41<br>(0-0-9)   |
| Australasia               | 50 to 54 | 0-18<br>(0-1)   | 0-28<br>(0-0-7)   | 0-17<br>(0-1)     | 0-5<br>(0-2-0-9)  |
| Australasia               | 55 to 59 | 0-37<br>(0-1)   | 0-38<br>(0-0-8)   | 0-25<br>(0-1)     | 0-55<br>(0-3-1)   |
| Australasia               | 60 to 64 | 0-6<br>(0-1)    | 0-47<br>(0-2-0-8) | 0-39<br>(0-1)     | 0-61<br>(0-4-1)   |
| Australasia               | 65 to 69 | 0-77<br>(0-1)   | 0-53<br>(0-3-0-8) | 0-56<br>(0-1)     | 0-67<br>(0-4-1)   |
| Australasia               | 70 to 74 | 0-9<br>(0-5-1)  | 0-58<br>(0-4-0-8) | 0-76<br>(0-1)     | 0-7<br>(0-5-1)    |
| Australasia               | 75 to 79 | 0-96<br>(0-5-1) | 0-61<br>(0-5-0-9) | 0-9<br>(0-1)      | 0-74<br>(0-5-1-8) |
| Australasia               | 80 plus  | 1-05<br>(0-5-2) | 0-67<br>(0-5-1-5) | 1-06<br>(0-5-2)   | 0-9<br>(0-5-2-3)  |
| High-income Asia Pacific  | 15 to 19 | 0-02<br>(0-0)   | 0-04<br>(0-0-4)   | 0-01<br>(0-0)     | 0-02<br>(0-0-2)   |
| High-income Asia Pacific  | 20 to 24 | 0-06<br>(0-1)   | 0-09<br>(0-1)     | 0-05<br>(0-1)     | 0-07<br>(0-1)     |
| High-income Asia Pacific  | 25 to 29 | 0-09<br>(0-1)   | 0-12<br>(0-0-8)   | 0-06<br>(0-1)     | 0-11<br>(0-1)     |
| High-income Asia Pacific  | 30 to 34 | 0-09<br>(0-1)   | 0-15<br>(0-0-7)   | 0-06<br>(0-1)     | 0-2<br>(0-1)      |
| High-income Asia Pacific  | 35 to 39 | 0-1<br>(0-1)    | 0-19<br>(0-0-6)   | 0-06<br>(0-1)     | 0-29<br>(0-1)     |
| High-income Asia Pacific  | 40 to 44 | 0-12<br>(0-1)   | 0-26<br>(0-0-6)   | 0-07<br>(0-1)     | 0-38<br>(0-0-9)   |
| High-income Asia Pacific  | 45 to 49 | 0-18<br>(0-1)   | 0-32<br>(0-0-6)   | 0-1<br>(0-1)      | 0-44<br>(0-1-0-9) |
| High-income Asia Pacific  | 50 to 54 | 0-29<br>(0-1)   | 0-38<br>(0-0-7)   | 0-11<br>(0-1)     | 0-46<br>(0-2-0-8) |
| High-income Asia Pacific  | 55 to 59 | 0-48<br>(0-1)   | 0-44<br>(0-2-0-7) | 0-12<br>(0-1)     | 0-48<br>(0-3-0-7) |
| High-income Asia Pacific  | 60 to 64 | 0-72<br>(0-1)   | 0-5<br>(0-3-0-7)  | 0-15<br>(0-1)     | 0-5<br>(0-3-0-7)  |
| High-income Asia Pacific  | 65 to 69 | 0-82<br>(0-5-1) | 0-53<br>(0-4-0-7) | 0-2<br>(0-1)      | 0-51<br>(0-4-0-6) |
| High-income Asia Pacific  | 70 to 74 | 0-89<br>(0-5-1) | 0-55<br>(0-4-0-7) | 0-34<br>(0-1)     | 0-52<br>(0-4-0-6) |
| High-income Asia Pacific  | 75 to 79 | 0-93<br>(0-5-1) | 0-56<br>(0-4-0-7) | 0-49<br>(0-1)     | 0-53<br>(0-4-0-7) |
| High-income Asia Pacific  | 80 plus  | 1-01<br>(0-5-2) | 0-57<br>(0-5-1)   | 0-73<br>(0-1)     | 0-55<br>(0-5-0-9) |
| High-income North America | 15 to 19 | 0-01<br>(0-0)   | 0-02<br>(0-0-3)   | 0-01<br>(0-0)     | 0-01<br>(0-0)     |
| High-income North America | 20 to 24 | 0-02<br>(0-0)   | 0-04<br>(0-0-4)   | 0-01<br>(0-0)     | 0-02<br>(0-0-1)   |
| High-income North America | 25 to 29 | 0-05<br>(0-0-5) | 0-1<br>(0-0-5)    | 0-01<br>(0-0)     | 0-03<br>(0-0-4)   |
| High-income North America | 30 to 34 | 0-11<br>(0-1)   | 0-21<br>(0-0-6)   | 0-02<br>(0-0)     | 0-12<br>(0-0-7)   |
| High-income North America | 35 to 39 | 0-24<br>(0-1)   | 0-32<br>(0-0-7)   | 0-04<br>(0-1)     | 0-3<br>(0-0-8)    |
| High-income North America | 40 to 44 | 0-44<br>(0-1)   | 0-42<br>(0-0-8)   | 0-14<br>(0-1)     | 0-47<br>(0-1-1)   |

|                           |          |                    |                   |                   |                   |
|---------------------------|----------|--------------------|-------------------|-------------------|-------------------|
| High-income North America | 45 to 49 | 0.62<br>(0-1)      | 0.5<br>(0.2-0.9)  | 0.28<br>(0-1)     | 0.59<br>(0.3-1)   |
| High-income North America | 50 to 54 | 0.77<br>(0-1)      | 0.57<br>(0.3-1)   | 0.46<br>(0-1)     | 0.68<br>(0.4-1)   |
| High-income North America | 55 to 59 | 0.88<br>(0.5-1)    | 0.64<br>(0.4-1)   | 0.6<br>(0-1)      | 0.74<br>(0.4-1)   |
| High-income North America | 60 to 64 | 0.94<br>(0.5-1)    | 0.69<br>(0.5-1)   | 0.76<br>(0-1)     | 0.8<br>(0.5-1)    |
| High-income North America | 65 to 69 | 0.96<br>(0.5-1)    | 0.71<br>(0.5-1)   | 0.86<br>(0-1)     | 0.85<br>(0.5-1)   |
| High-income North America | 70 to 74 | 0.99<br>(0.5-1)    | 0.71<br>(0.5-1)   | 0.94<br>(0-1)     | 0.86<br>(0.6-1.9) |
| High-income North America | 75 to 79 | 1.01<br>(1-1)      | 0.7<br>(0.5-1)    | 1<br>(0.5-2)      | 0.9<br>(0.6-2)    |
| High-income North America | 80 plus  | 1.08<br>(1-2)      | 0.78<br>(0.5-2.1) | 1.15<br>(0.5-3)   | 1.13<br>(0.6-2.4) |
| Southern Latin America    | 15 to 19 | 0<br>(0-0)         | 0.01<br>(0-0.2)   | 0<br>(0-0)        | 0.01<br>(0-0)     |
| Southern Latin America    | 20 to 24 | 0<br>(0-0)         | 0.02<br>(0-0.2)   | 0.01<br>(0-0)     | 0.01<br>(0-0)     |
| Southern Latin America    | 25 to 29 | 0<br>(0-0)         | 0.04<br>(0-0.3)   | 0<br>(0-0)        | 0.01<br>(0-0.1)   |
| Southern Latin America    | 30 to 34 | 0<br>(0-0)         | 0.1<br>(0-0.4)    | 0<br>(0-0)        | 0.03<br>(0-0.3)   |
| Southern Latin America    | 35 to 39 | 0.02<br>(0-0.5)    | 0.17<br>(0-0.4)   | 0<br>(0-0)        | 0.13<br>(0-0.4)   |
| Southern Latin America    | 40 to 44 | 0.1<br>(0-1)       | 0.28<br>(0-0.5)   | 0.02<br>(0-0)     | 0.28<br>(0-0.6)   |
| Southern Latin America    | 45 to 49 | 0.26<br>(0-1)      | 0.38<br>(0-0.7)   | 0.08<br>(0-1)     | 0.41<br>(0-0.9)   |
| Southern Latin America    | 50 to 54 | 0.53<br>(0-1)      | 0.47<br>(0.2-0.8) | 0.18<br>(0-1)     | 0.51<br>(0.2-1)   |
| Southern Latin America    | 55 to 59 | 0.74<br>(0-1)      | 0.55<br>(0.3-0.9) | 0.3<br>(0-1)      | 0.57<br>(0.3-1)   |
| Southern Latin America    | 60 to 64 | 0.88<br>(0.5-1)    | 0.62<br>(0.4-0.9) | 0.46<br>(0-1)     | 0.62<br>(0.4-1)   |
| Southern Latin America    | 65 to 69 | 0.93<br>(0.5-1)    | 0.64<br>(0.5-0.9) | 0.6<br>(0-1)      | 0.66<br>(0.5-1)   |
| Southern Latin America    | 70 to 74 | 0.96<br>(0.5-1)    | 0.65<br>(0.5-0.9) | 0.76<br>(0-1)     | 0.66<br>(0.5-1)   |
| Southern Latin America    | 75 to 79 | 0.98<br>(0.5-1)    | 0.64<br>(0.5-1)   | 0.83<br>(0-1)     | 0.67<br>(0.5-1)   |
| Southern Latin America    | 80 plus  | 1.02<br>(0.5-1.51) | 0.66<br>(0.5-1)   | 0.92<br>(0.5-1.5) | 0.68<br>(0.5-1)   |
| Western Europe            | 15 to 19 | 0<br>(0-0)         | 0<br>(0-0)        | 0<br>(0-0)        | 0<br>(0-0)        |
| Western Europe            | 20 to 24 | 0.02<br>(0-0.5)    | 0.03<br>(0-0.3)   | 0<br>(0-0)        | 0.01<br>(0-0)     |
| Western Europe            | 25 to 29 | 0.09<br>(0-0.5)    | 0.11<br>(0-0.5)   | 0.01<br>(0-0)     | 0.04<br>(0-0.4)   |
| Western Europe            | 30 to 34 | 0.12<br>(0-1)      | 0.16<br>(0-0.6)   | 0.01<br>(0-0)     | 0.12<br>(0-0.6)   |
| Western Europe            | 35 to 39 | 0.11<br>(0-1)      | 0.17<br>(0-0.6)   | 0.02<br>(0-0)     | 0.25<br>(0-0.7)   |
| Western Europe            | 40 to 44 | 0.12<br>(0-1)      | 0.21<br>(0-0.6)   | 0.04<br>(0-1)     | 0.36<br>(0-0.8)   |
| Western Europe            | 45 to 49 | 0.16<br>(0-1)      | 0.26<br>(0-0.7)   | 0.09<br>(0-1)     | 0.44<br>(0-0.9)   |
| Western Europe            | 50 to 54 | 0.27<br>(0-1)      | 0.34<br>(0-0.8)   | 0.16<br>(0-1)     | 0.5<br>(0.2-1)    |
| Western Europe            | 55 to 59 | 0.47<br>(0-1)      | 0.43<br>(0-0.8)   | 0.24<br>(0-1)     | 0.55<br>(0.3-1)   |

|                      |          |                  |                   |                 |                   |
|----------------------|----------|------------------|-------------------|-----------------|-------------------|
| Western Europe       | 60 to 64 | 0.71<br>(0-1)    | 0.52<br>(0.3-0.8) | 0.4<br>(0-1)    | 0.61<br>(0.4-1)   |
| Western Europe       | 65 to 69 | 0.84<br>(0.5-1)  | 0.58<br>(0.4-0.9) | 0.58<br>(0-1)   | 0.66<br>(0.4-1)   |
| Western Europe       | 70 to 74 | 0.93<br>(0.5-1)  | 0.6<br>(0.4-0.9)  | 0.77<br>(0-1)   | 0.68<br>(0.5-1)   |
| Western Europe       | 75 to 79 | 0.96<br>(0.5-1)  | 0.62<br>(0.5-0.9) | 0.89<br>(0-1)   | 0.7<br>(0.5-1)    |
| Western Europe       | 80 plus  | 1.02<br>(0.5-2)  | 0.65<br>(0.5-1)   | 0.99<br>(0.5-2) | 0.74<br>(0.5-1.9) |
| Andean Latin America | 15 to 19 | 0<br>(0-0)       | 0.06<br>(0-0.3)   | 0<br>(0-0)      | 0.01<br>(0-0.2)   |
| Andean Latin America | 20 to 24 | 0<br>(0-0)       | 0.09<br>(0-0.3)   | 0<br>(0-0)      | 0.01<br>(0-0.2)   |
| Andean Latin America | 25 to 29 | 0<br>(0-0)       | 0.17<br>(0-0.4)   | 0<br>(0-0)      | 0.02<br>(0-0.2)   |
| Andean Latin America | 30 to 34 | 0.02<br>(0-0.01) | 0.23<br>(0-0.4)   | 0<br>(0-0)      | 0.07<br>(0-0.3)   |
| Andean Latin America | 35 to 39 | 0.07<br>(0-1)    | 0.3<br>(0-0.5)    | 0<br>(0-0)      | 0.15<br>(0-0.4)   |
| Andean Latin America | 40 to 44 | 0.26<br>(0-1)    | 0.38<br>(0.1-0.7) | 0.01<br>(0-0)   | 0.26<br>(0-0.6)   |
| Andean Latin America | 45 to 49 | 0.58<br>(0-1)    | 0.49<br>(0.3-0.8) | 0.05<br>(0-1)   | 0.38<br>(0-0.8)   |
| Andean Latin America | 50 to 54 | 0.79<br>(0-1)    | 0.58<br>(0.3-0.9) | 0.13<br>(0-1)   | 0.49<br>(0.2-1)   |
| Andean Latin America | 55 to 59 | 0.87<br>(0.5-1)  | 0.64<br>(0.4-0.9) | 0.24<br>(0-1)   | 0.58<br>(0.3-1)   |
| Andean Latin America | 60 to 64 | 0.93<br>(0.5-1)  | 0.69<br>(0.5-1)   | 0.38<br>(0-1)   | 0.63<br>(0.4-1)   |
| Andean Latin America | 65 to 69 | 0.96<br>(0.5-1)  | 0.71<br>(0.5-1)   | 0.51<br>(0-1)   | 0.67<br>(0.4-1)   |
| Andean Latin America | 70 to 74 | 0.98<br>(0.5-1)  | 0.72<br>(0.5-1)   | 0.64<br>(0-1)   | 0.69<br>(0.5-1)   |
| Andean Latin America | 75 to 79 | 0.99<br>(0.5-1)  | 0.72<br>(0.5-1)   | 0.75<br>(0-1)   | 0.7<br>(0.5-1)    |
| Andean Latin America | 80 plus  | 1.02<br>(1-1.5)  | 0.74<br>(0.5-1)   | 0.9<br>(0-1)    | 0.72<br>(0.5-1)   |
| Caribbean            | 15 to 19 | 0.01<br>(0-0)    | 0.08<br>(0-0.4)   | 0<br>(0-0)      | 0.01<br>(0-0)     |
| Caribbean            | 20 to 24 | 0.03<br>(0-0.5)  | 0.18<br>(0-0.5)   | 0.01<br>(0-0)   | 0.02<br>(0-0.2)   |
| Caribbean            | 25 to 29 | 0.08<br>(0-1)    | 0.28<br>(0-0.6)   | 0.01<br>(0-0)   | 0.03<br>(0-0.3)   |
| Caribbean            | 30 to 34 | 0.25<br>(0-1)    | 0.39<br>(0.1-0.7) | 0.01<br>(0-0)   | 0.11<br>(0-0.4)   |
| Caribbean            | 35 to 39 | 0.56<br>(0-1)    | 0.48<br>(0.3-0.8) | 0.01<br>(0-0)   | 0.26<br>(0-0.6)   |
| Caribbean            | 40 to 44 | 0.8<br>(0-1)     | 0.57<br>(0.4-0.8) | 0.06<br>(0-1)   | 0.42<br>(0.1-0.8) |
| Caribbean            | 45 to 49 | 0.92<br>(0.5-1)  | 0.64<br>(0.4-0.9) | 0.21<br>(0-1)   | 0.54<br>(0.3-1)   |
| Caribbean            | 50 to 54 | 0.97<br>(0.5-1)  | 0.7<br>(0.5-1)    | 0.43<br>(0-1)   | 0.64<br>(0.4-1)   |
| Caribbean            | 55 to 59 | 0.99<br>(0.5-1)  | 0.75<br>(0.5-1)   | 0.61<br>(0-1)   | 0.7<br>(0.5-1)    |
| Caribbean            | 60 to 64 | 1.02<br>(0.5-2)  | 0.79<br>(0.6-1)   | 0.79<br>(0-1)   | 0.73<br>(0.5-1)   |
| Caribbean            | 65 to 69 | 1.04<br>(1-2)    | 0.8<br>(0.6-1)    | 0.88<br>(0-1)   | 0.77<br>(0.5-1)   |
| Caribbean            | 70 to 74 | 1.06<br>(1-2)    | 0.77<br>(0.6-1)   | 0.95<br>(0-1)   | 0.77<br>(0.6-1)   |



|                              |          |            |            |            |           |
|------------------------------|----------|------------|------------|------------|-----------|
|                              |          | 1-07       | 0-76       | 0-97       | 0-78      |
| Caribbean                    | 75 to 79 | (1-2)      | (0-6-1)    | (0-5-1-5)  | (0-6-1-5) |
|                              |          | 1-08       | 0-78       | 1-03       | 0-81      |
| Caribbean                    | 80 plus  | (1-2)      | (0-6-1-51) | (0-5-2)    | (0-6-2)   |
|                              |          | 0          | 0-02       | 0-02       | 0-02      |
| Central Latin America        | 15 to 19 | (0-0)      | (0-0-3)    | (0-0)      | (0-0-2)   |
|                              |          | 0-02       | 0-07       | 0-02       | 0-03      |
| Central Latin America        | 20 to 24 | (0-0-5)    | (0-0-4)    | (0-0)      | (0-0-4)   |
|                              |          | 0-09       | 0-18       | 0-02       | 0-04      |
| Central Latin America        | 25 to 29 | (0-1)      | (0-0-6)    | (0-0)      | (0-0-5)   |
|                              |          | 0-27       | 0-33       | 0-02       | 0-06      |
| Central Latin America        | 30 to 34 | (0-1)      | (0-0-7)    | (0-0)      | (0-0-7)   |
|                              |          | 0-55       | 0-47       | 0-03       | 0-16      |
| Central Latin America        | 35 to 39 | (0-1)      | (0-1-0-8)  | (0-1)      | (0-0-8)   |
|                              |          | 0-8        | 0-61       | 0-07       | 0-34      |
| Central Latin America        | 40 to 44 | (0-1)      | (0-3-0-9)  | (0-1)      | (0-1)     |
|                              |          | 0-9        | 0-7        | 0-18       | 0-53      |
| Central Latin America        | 45 to 49 | (0-5-1)    | (0-4-0-9)  | (0-1)      | (0-1)     |
|                              |          | 0-96       | 0-77       | 0-36       | 0-67      |
| Central Latin America        | 50 to 54 | (0-5-1)    | (0-5-1)    | (0-1)      | (0-3-1)   |
|                              |          | 0-99       | 0-81       | 0-56       | 0-77      |
| Central Latin America        | 55 to 59 | (0-5-2)    | (0-6-1)    | (0-1)      | (0-4-1)   |
|                              |          | 1-02       | 0-84       | 0-73       | 0-82      |
| Central Latin America        | 60 to 64 | (0-5-2)    | (0-6-1)    | (0-1)      | (0-5-1)   |
|                              |          | 1-04       | 0-86       | 0-87       | 0-86      |
| Central Latin America        | 65 to 69 | (0-5-2)    | (0-7-1)    | (0-1)      | (0-6-1)   |
|                              |          | 1-06       | 0-86       | 0-95       | 0-87      |
| Central Latin America        | 70 to 74 | (1-2)      | (0-6-1)    | (0-2)      | (0-6-1)   |
|                              |          | 1-07       | 0-86       | 0-99       | 0-89      |
| Central Latin America        | 75 to 79 | (1-2)      | (0-6-1)    | (0-5-2)    | (0-6-1-8) |
|                              |          | 1-09       | 0-95       | 1-07       | 0-98      |
| Central Latin America        | 80 plus  | (1-2)      | (0-6-2)    | (0-5-2)    | (0-6-2)   |
|                              |          | 0-01       | 0-02       | 0-03       | 0-04      |
| Tropical Latin America       | 15 to 19 | (0-0)      | (0-0-2)    | (0-1)      | (0-1)     |
|                              |          | 0-01       | 0-04       | 0-03       | 0-03      |
| Tropical Latin America       | 20 to 24 | (0-0)      | (0-0-3)    | (0-1)      | (0-1)     |
|                              |          | 0-02       | 0-1        | 0-02       | 0-03      |
| Tropical Latin America       | 25 to 29 | (0-0-5)    | (0-0-4)    | (0-0)      | (0-0-4)   |
|                              |          | 0-05       | 0-23       | 0-02       | 0-04      |
| Tropical Latin America       | 30 to 34 | (0-0-5)    | (0-0-5)    | (0-0)      | (0-0-4)   |
|                              |          | 0-22       | 0-35       | 0-02       | 0-1       |
| Tropical Latin America       | 35 to 39 | (0-1)      | (0-0-6)    | (0-0)      | (0-0-4)   |
|                              |          | 0-55       | 0-47       | 0-02       | 0-25      |
| Tropical Latin America       | 40 to 44 | (0-1)      | (0-3-0-8)  | (0-0)      | (0-0-6)   |
|                              |          | 0-81       | 0-57       | 0-05       | 0-38      |
| Tropical Latin America       | 45 to 49 | (0-1)      | (0-4-0-9)  | (0-1)      | (0-0-7)   |
|                              |          | 0-91       | 0-64       | 0-13       | 0-48      |
| Tropical Latin America       | 50 to 54 | (0-5-1)    | (0-4-0-9)  | (0-1)      | (0-3-0-9) |
|                              |          | 0-96       | 0-71       | 0-28       | 0-56      |
| Tropical Latin America       | 55 to 59 | (0-5-1)    | (0-5-1)    | (0-1)      | (0-4-1)   |
|                              |          | 1          | 0-74       | 0-54       | 0-63      |
| Tropical Latin America       | 60 to 64 | (0-5-1)    | (0-5-1)    | (0-1)      | (0-4-1)   |
|                              |          | 1-01       | 0-76       | 0-73       | 0-67      |
| Tropical Latin America       | 65 to 69 | (0-5-1-51) | (0-5-1)    | (0-1)      | (0-5-1)   |
|                              |          | 1-05       | 0-73       | 0-86       | 0-68      |
| Tropical Latin America       | 70 to 74 | (1-2)      | (0-6-1)    | (0-1)      | (0-5-1)   |
|                              |          | 1-06       | 0-71       | 0-9        | 0-68      |
| Tropical Latin America       | 75 to 79 | (1-2)      | (0-6-1)    | (0-1)      | (0-5-1)   |
|                              |          | 1-07       | 0-69       | 0-94       | 0-68      |
| Tropical Latin America       | 80 plus  | (1-2)      | (0-5-1)    | (0-5-1-51) | (0-5-1)   |
|                              |          | 0-03       | 0-27       | 0          | 0-07      |
| North Africa and Middle East | 15 to 19 | (0-0-5)    | (0-0-4)    | (0-0)      | (0-0-4)   |

|                              |          |         |            |           |           |
|------------------------------|----------|---------|------------|-----------|-----------|
|                              |          | 0.06    | 0.3        | 0         | 0.07      |
| North Africa and Middle East | 20 to 24 | (0-1)   | (0-0.5)    | (0-0)     | (0-0.4)   |
|                              |          | 0.15    | 0.35       | 0         | 0.17      |
| North Africa and Middle East | 25 to 29 | (0-1)   | (0.1-0.5)  | (0-0)     | (0-0.4)   |
|                              |          | 0.44    | 0.42       | 0.02      | 0.27      |
| North Africa and Middle East | 30 to 34 | (0-1)   | (0.2-0.6)  | (0-0)     | (0-0.5)   |
|                              |          | 0.66    | 0.47       | 0.06      | 0.37      |
| North Africa and Middle East | 35 to 39 | (0-1)   | (0.3-0.7)  | (0-1)     | (0-0.7)   |
|                              |          | 0.87    | 0.54       | 0.27      | 0.51      |
| North Africa and Middle East | 40 to 44 | (0-1)   | (0.4-0.8)  | (0-1)     | (0.3-1)   |
|                              |          | 0.96    | 0.64       | 0.62      | 0.7       |
| North Africa and Middle East | 45 to 49 | (0.5-1) | (0.4-1)    | (0-1)     | (0.4-1.8) |
|                              |          | 1.01    | 0.72       | 0.86      | 0.85      |
| North Africa and Middle East | 50 to 54 | (1-1)   | (0.5-1)    | (0-1)     | (0.5-2)   |
|                              |          | 1.02    | 0.8        | 0.95      | 0.94      |
| North Africa and Middle East | 55 to 59 | (1-1.5) | (0.5-1.5)  | (0-1.5)   | (0.5-2)   |
|                              |          | 1.05    | 0.86       | 0.99      | 0.95      |
| North Africa and Middle East | 60 to 64 | (1-2)   | (0.6-2)    | (0.5-1.5) | (0.5-2)   |
|                              |          | 1.05    | 0.89       | 1.01      | 0.96      |
| North Africa and Middle East | 65 to 69 | (1-2)   | (0.6-2)    | (0.5-2)   | (0.5-2)   |
|                              |          | 1.06    | 0.87       | 1.01      | 0.89      |
| North Africa and Middle East | 70 to 74 | (1-2)   | (0.6-2)    | (0.5-1.5) | (0.5-2)   |
|                              |          | 1.07    | 0.88       | 1.03      | 0.88      |
| North Africa and Middle East | 75 to 79 | (1-2)   | (0.5-2)    | (0.5-2)   | (0.5-2)   |
|                              |          | 1.09    | 0.9        | 1.05      | 0.91      |
| North Africa and Middle East | 80 plus  | (1-2)   | (0.5-2)    | (0.5-2)   | (0.5-2)   |
|                              |          | 0.03    | 0.1        | 0         | 0.01      |
| South Asia                   | 15 to 19 | (0-0.5) | (0-1)      | (0-0)     | (0-0.1)   |
|                              |          | 0.03    | 0.15       | 0         | 0.04      |
| South Asia                   | 20 to 24 | (0-1)   | (0-1)      | (0-0)     | (0-0.3)   |
|                              |          | 0.04    | 0.24       | 0         | 0.09      |
| South Asia                   | 25 to 29 | (0-1)   | (0-1)      | (0-0)     | (0-0.4)   |
|                              |          | 0.08    | 0.36       | 0.01      | 0.28      |
| South Asia                   | 30 to 34 | (0-1)   | (0-1)      | (0-0)     | (0-0.7)   |
|                              |          | 0.15    | 0.42       | 0.03      | 0.37      |
| South Asia                   | 35 to 39 | (0-1)   | (0.1-1)    | (0-1)     | (0-1)     |
|                              |          | 0.48    | 0.53       | 0.09      | 0.5       |
| South Asia                   | 40 to 44 | (0-1)   | (0.3-2)    | (0-1)     | (0.2-1.9) |
|                              |          | 0.79    | 0.57       | 0.19      | 0.58      |
| South Asia                   | 45 to 49 | (0-1)   | (0.4-1)    | (0-1)     | (0.3-2)   |
|                              |          | 0.89    | 0.62       | 0.35      | 0.65      |
| South Asia                   | 50 to 54 | (0-1)   | (0.4-1)    | (0-1)     | (0.4-2)   |
|                              |          | 0.96    | 0.68       | 0.48      | 0.7       |
| South Asia                   | 55 to 59 | (0.5-1) | (0.4-1.9)  | (0-1)     | (0.4-2)   |
|                              |          | 0.99    | 0.68       | 0.66      | 0.71      |
| South Asia                   | 60 to 64 | (0.5-1) | (0.5-1)    | (0-1)     | (0.4-2)   |
|                              |          | 1       | 0.68       | 0.76      | 0.72      |
| South Asia                   | 65 to 69 | (0.5-1) | (0.5-1.01) | (0-1)     | (0.5-2)   |
|                              |          | 1.01    | 0.68       | 0.85      | 0.74      |
| South Asia                   | 70 to 74 | (1-1)   | (0.5-1.5)  | (0-1)     | (0.5-2)   |
|                              |          | 1.02    | 0.72       | 0.9       | 0.76      |
| South Asia                   | 75 to 79 | (1-1.5) | (0.5-1.8)  | (0-1)     | (0.5-2)   |
|                              |          | 1.03    | 0.73       | 0.96      | 0.81      |
| South Asia                   | 80 plus  | (1-2)   | (0.5-1.5)  | (0.5-1)   | (0.5-2.1) |
|                              |          | 0       | 0.11       | 0         | 0.04      |
| East Asia                    | 15 to 19 | (0-0)   | (0-0.4)    | (0-0)     | (0-0.3)   |
|                              |          | 0.03    | 0.21       | 0         | 0.09      |
| East Asia                    | 20 to 24 | (0-0.5) | (0-0.5)    | (0-0)     | (0-0.4)   |
|                              |          | 0.1     | 0.3        | 0         | 0.17      |
| East Asia                    | 25 to 29 | (0-1)   | (0-0.5)    | (0-0)     | (0-0.4)   |
|                              |          | 0.14    | 0.34       | 0         | 0.28      |
| East Asia                    | 30 to 34 | (0-1)   | (0-0.5)    | (0-0)     | (0-0.5)   |

|                |          |           |           |          |           |
|----------------|----------|-----------|-----------|----------|-----------|
|                |          | 0-22      | 0-38      | 0-01     | 0-35      |
| East Asia      | 35 to 39 | (0-1)     | (0-2-0-6) | (0-0)    | (0-1-0-5) |
|                |          | 0-37      | 0-42      | 0-03     | 0-4       |
| East Asia      | 40 to 44 | (0-1)     | (0-3-0-6) | (0-0-51) | (0-2-0-5) |
|                |          | 0-64      | 0-47      | 0-04     | 0-43      |
| East Asia      | 45 to 49 | (0-1)     | (0-4-0-6) | (0-1)    | (0-3-0-6) |
|                |          | 0-81      | 0-5       | 0-08     | 0-46      |
| East Asia      | 50 to 54 | (0-1)     | (0-4-0-6) | (0-1)    | (0-4-0-6) |
|                |          | 0-9       | 0-53      | 0-16     | 0-48      |
| East Asia      | 55 to 59 | (0-5-1)   | (0-4-0-7) | (0-1)    | (0-4-0-6) |
|                |          | 0-97      | 0-56      | 0-33     | 0-5       |
| East Asia      | 60 to 64 | (0-5-1-5) | (0-5-0-7) | (0-1)    | (0-4-0-6) |
|                |          | 1-02      | 0-57      | 0-48     | 0-51      |
| East Asia      | 65 to 69 | (0-5-2)   | (0-5-0-8) | (0-1)    | (0-4-0-6) |
|                |          | 1-04      | 0-58      | 0-64     | 0-52      |
| East Asia      | 70 to 74 | (0-5-2)   | (0-5-0-8) | (0-1)    | (0-5-0-6) |
|                |          | 1-07      | 0-59      | 0-75     | 0-54      |
| East Asia      | 75 to 79 | (0-5-2)   | (0-5-1)   | (0-1)    | (0-5-0-6) |
|                |          | 1-12      | 0-66      | 0-92     | 0-61      |
| East Asia      | 80 plus  | (1-2)     | (0-5-1-5) | (0-2)    | (0-5-1-5) |
|                |          | 0-01      | 0-22      | 0        | 0-02      |
| Oceania        | 15 to 19 | (0-0)     | (0-2-2)   | (0-0)    | (0-0-2)   |
|                |          | 0-02      | 0-3       | 0        | 0-07      |
| Oceania        | 20 to 24 | (0-0-5)   | (0-2-2)   | (0-0)    | (0-0-4)   |
|                |          | 0-12      | 0-4       | 0        | 0-25      |
| Oceania        | 25 to 29 | (0-1)     | (0-1-0-7) | (0-0)    | (0-0-6)   |
|                |          | 0-46      | 0-52      | 0-02     | 0-48      |
| Oceania        | 30 to 34 | (0-1)     | (0-3-2)   | (0-0)    | (0-2-2-1) |
|                |          | 0-75      | 0-6       | 0-15     | 0-58      |
| Oceania        | 35 to 39 | (0-1)     | (0-4-1)   | (0-1)    | (0-3-1-9) |
|                |          | 0-92      | 0-68      | 0-45     | 0-75      |
| Oceania        | 40 to 44 | (0-5-1)   | (0-4-1)   | (0-1)    | (0-4-2)   |
|                |          | 0-97      | 0-7       | 0-65     | 0-82      |
| Oceania        | 45 to 49 | (0-5-1)   | (0-5-1)   | (0-1)    | (0-5-2)   |
|                |          | 1-03      | 0-74      | 0-81     | 0-87      |
| Oceania        | 50 to 54 | (0-5-2)   | (0-5-1)   | (0-1)    | (0-5-2)   |
|                |          | 1-05      | 0-76      | 0-91     | 0-9       |
| Oceania        | 55 to 59 | (0-5-2)   | (0-5-1)   | (0-2)    | (0-6-2)   |
|                |          | 1-09      | 0-77      | 0-93     | 0-88      |
| Oceania        | 60 to 64 | (0-5-2)   | (0-6-1)   | (0-2)    | (0-6-2-1) |
|                |          | 1-13      | 0-77      | 0-93     | 0-87      |
| Oceania        | 65 to 69 | (1-2)     | (0-6-1)   | (0-2)    | (0-6-2-1) |
|                |          | 1-12      | 0-75      | 0-94     | 0-82      |
| Oceania        | 70 to 74 | (1-2)     | (0-6-1-5) | (0-2)    | (0-5-2)   |
|                |          | 1-11      | 0-71      | 0-96     | 0-81      |
| Oceania        | 75 to 79 | (1-2)     | (0-5-1-5) | (0-2)    | (0-5-2)   |
|                |          | 1-13      | 0-7       | 0-98     | 0-8       |
| Oceania        | 80 plus  | (1-2)     | (0-5-1-5) | (0-2)    | (0-5-2-1) |
|                |          | 0-01      | 0-22      | 0        | 0-02      |
| Southeast Asia | 15 to 19 | (0-0)     | (0-0-5)   | (0-0)    | (0-0-2)   |
|                |          | 0-02      | 0-37      | 0        | 0-06      |
| Southeast Asia | 20 to 24 | (0-0-01)  | (0-2-2)   | (0-0)    | (0-0-3)   |
|                |          | 0-06      | 0-42      | 0        | 0-17      |
| Southeast Asia | 25 to 29 | (0-1)     | (0-1-2)   | (0-0)    | (0-0-4)   |
|                |          | 0-17      | 0-41      | 0-01     | 0-3       |
| Southeast Asia | 30 to 34 | (0-1)     | (0-2-0-8) | (0-0)    | (0-0-5)   |
|                |          | 0-31      | 0-45      | 0-03     | 0-38      |
| Southeast Asia | 35 to 39 | (0-1)     | (0-3-0-8) | (0-1)    | (0-1-0-7) |
|                |          | 0-57      | 0-48      | 0-09     | 0-44      |
| Southeast Asia | 40 to 44 | (0-1)     | (0-3-0-7) | (0-1)    | (0-2-1)   |
|                |          | 0-73      | 0-51      | 0-14     | 0-48      |
| Southeast Asia | 45 to 49 | (0-1)     | (0-4-0-8) | (0-1)    | (0-3-1)   |

|                            |          |           |            |       |            |
|----------------------------|----------|-----------|------------|-------|------------|
|                            |          | 0.85      | 0.54       | 0.22  | 0.52       |
| Southeast Asia             | 50 to 54 | (0-1)     | (0.4-0.8)  | (0-1) | (0.4-1)    |
|                            |          | 0.92      | 0.57       | 0.3   | 0.54       |
| Southeast Asia             | 55 to 59 | (0.5-1)   | (0.4-0.8)  | (0-1) | (0.4-1)    |
|                            |          | 0.96      | 0.59       | 0.46  | 0.56       |
| Southeast Asia             | 60 to 64 | (0.5-1)   | (0.5-0.8)  | (0-1) | (0.4-1)    |
|                            |          | 0.99      | 0.61       | 0.53  | 0.57       |
| Southeast Asia             | 65 to 69 | (0.5-1)   | (0.5-0.9)  | (0-1) | (0.5-1)    |
|                            |          | 1.01      | 0.61       | 0.67  | 0.59       |
| Southeast Asia             | 70 to 74 | (0.5-2)   | (0.5-1)    | (0-1) | (0.5-1)    |
|                            |          | 1.01      | 0.6        | 0.71  | 0.59       |
| Southeast Asia             | 75 to 79 | (0.5-2)   | (0.5-1)    | (0-1) | (0.5-1)    |
|                            |          | 1.05      | 0.62       | 0.81  | 0.62       |
| Southeast Asia             | 80 plus  | (0.5-2)   | (0.5-1)    | (0-1) | (0.5-1.5)  |
|                            |          | 0         | 0.21       | 0     | 0.01       |
| Central Sub-Saharan Africa | 15 to 19 | (0-0)     | (0-2.6)    | (0-0) | (0-0.1)    |
|                            |          | 0.01      | 0.35       | 0     | 0.02       |
| Central Sub-Saharan Africa | 20 to 24 | (0-0)     | (0-3)      | (0-0) | (0-0.1)    |
|                            |          | 0.02      | 0.46       | 0     | 0.06       |
| Central Sub-Saharan Africa | 25 to 29 | (0-0)     | (0.4-0.2)  | (0-0) | (0-0.3)    |
|                            |          | 0.02      | 0.48       | 0.01  | 0.13       |
| Central Sub-Saharan Africa | 30 to 34 | (0-0.5)   | (0-3)      | (0-0) | (0-2)      |
|                            |          | 0.03      | 0.52       | 0.01  | 0.21       |
| Central Sub-Saharan Africa | 35 to 39 | (0-0.51)  | (0-2.6)    | (0-0) | (0-2)      |
|                            |          | 0.08      | 0.5        | 0.02  | 0.35       |
| Central Sub-Saharan Africa | 40 to 44 | (0-1)     | (0.1-2.3)  | (0-0) | (0-2)      |
|                            |          | 0.16      | 0.53       | 0.03  | 0.46       |
| Central Sub-Saharan Africa | 45 to 49 | (0-1)     | (0.2-2.2)  | (0-1) | (0-2)      |
|                            |          | 0.27      | 0.57       | 0.06  | 0.56       |
| Central Sub-Saharan Africa | 50 to 54 | (0-1)     | (0.3-2.2)  | (0-1) | (0.2-2)    |
|                            |          | 0.51      | 0.61       | 0.1   | 0.6        |
| Central Sub-Saharan Africa | 55 to 59 | (0-1)     | (0.3-2.1)  | (0-1) | (0.3-2)    |
|                            |          | 0.74      | 0.62       | 0.2   | 0.62       |
| Central Sub-Saharan Africa | 60 to 64 | (0-1)     | (0.4-2)    | (0-1) | (0.4-2)    |
|                            |          | 0.84      | 0.62       | 0.26  | 0.62       |
| Central Sub-Saharan Africa | 65 to 69 | (0-1)     | (0.4-2)    | (0-1) | (0.4-2)    |
|                            |          | 0.91      | 0.63       | 0.4   | 0.65       |
| Central Sub-Saharan Africa | 70 to 74 | (0.5-1)   | (0.4-1.5)  | (0-1) | (0.4-2)    |
|                            |          | 0.93      | 0.63       | 0.47  | 0.65       |
| Central Sub-Saharan Africa | 75 to 79 | (0.5-1)   | (0.4-1.5)  | (0-1) | (0.4-2)    |
|                            |          | 0.97      | 0.64       | 0.66  | 0.67       |
| Central Sub-Saharan Africa | 80 plus  | (0.5-1.5) | (0.5-1.5)  | (0-1) | (0.5-2)    |
|                            |          | 0         | 0.15       | 0     | 0.02       |
| Eastern Sub-Saharan Africa | 15 to 19 | (0-0)     | (0-2)      | (0-0) | (0-0.2)    |
|                            |          | 0.01      | 0.27       | 0     | 0.05       |
| Eastern Sub-Saharan Africa | 20 to 24 | (0-0)     | (0-2.3)    | (0-0) | (0-0.3)    |
|                            |          | 0.01      | 0.3        | 0     | 0.09       |
| Eastern Sub-Saharan Africa | 25 to 29 | (0-0)     | (0-2.3)    | (0-0) | (0-1)      |
|                            |          | 0.02      | 0.37       | 0     | 0.27       |
| Eastern Sub-Saharan Africa | 30 to 34 | (0-0.5)   | (0-2.1)    | (0-0) | (0-2.1)    |
|                            |          | 0.05      | 0.41       | 0.01  | 0.31       |
| Eastern Sub-Saharan Africa | 35 to 39 | (0-1)     | (0-2)      | (0-0) | (0-2)      |
|                            |          | 0.11      | 0.4        | 0.02  | 0.36       |
| Eastern Sub-Saharan Africa | 40 to 44 | (0-1)     | (0.1-1)    | (0-0) | (0-1)      |
|                            |          | 0.18      | 0.44       | 0.02  | 0.43       |
| Eastern Sub-Saharan Africa | 45 to 49 | (0-1)     | (0.2-1)    | (0-0) | (0-2)      |
|                            |          | 0.18      | 0.46       | 0.02  | 0.46       |
| Eastern Sub-Saharan Africa | 50 to 54 | (0-1)     | (0.2-1.51) | (0-0) | (0.2-2)    |
|                            |          | 0.38      | 0.5        | 0.03  | 0.49       |
| Eastern Sub-Saharan Africa | 55 to 59 | (0-1)     | (0.3-1)    | (0-1) | (0.3-1.51) |
|                            |          | 0.61      | 0.52       | 0.1   | 0.51       |
| Eastern Sub-Saharan Africa | 60 to 64 | (0-1)     | (0.3-1)    | (0-1) | (0.4-1)    |

|                             |          |                   |                  |                 |                    |
|-----------------------------|----------|-------------------|------------------|-----------------|--------------------|
| Eastern Sub-Saharan Africa  | 65 to 69 | 0.74<br>(0-1)     | 0.52<br>(0.4-1)  | 0.1<br>(0-1)    | 0.5<br>(0.4-0.9)   |
| Eastern Sub-Saharan Africa  | 70 to 74 | 0.83<br>(0-1)     | 0.54<br>(0.4-1)  | 0.15<br>(0-1)   | 0.54<br>(0.4-1)    |
| Eastern Sub-Saharan Africa  | 75 to 79 | 0.88<br>(0.5-1)   | 0.55<br>(0.4-1)  | 0.17<br>(0-1)   | 0.55<br>(0.4-1)    |
| Eastern Sub-Saharan Africa  | 80 plus  | 0.88<br>(0.5-1)   | 0.57<br>(0.4-1)  | 0.31<br>(0-1)   | 0.58<br>(0.4-1.51) |
| Southern Sub-Saharan Africa | 15 to 19 | 0.01<br>(0-0)     | 0.33<br>(0-3)    | 0<br>(0-0)      | 0.02<br>(0-0.1)    |
| Southern Sub-Saharan Africa | 20 to 24 | 0.01<br>(0-0)     | 0.43<br>(0-5)    | 0<br>(0-0)      | 0.02<br>(0-0.1)    |
| Southern Sub-Saharan Africa | 25 to 29 | 0<br>(0-0)        | 0.35<br>(0-3)    | 0<br>(0-0)      | 0.02<br>(0-0.1)    |
| Southern Sub-Saharan Africa | 30 to 34 | 0.01<br>(0-0)     | 0.31<br>(0-2.6)  | 0<br>(0-0)      | 0.04<br>(0-0.2)    |
| Southern Sub-Saharan Africa | 35 to 39 | 0.02<br>(0-0.01)  | 0.32<br>(0-2.3)  | 0<br>(0-0)      | 0.11<br>(0-1)      |
| Southern Sub-Saharan Africa | 40 to 44 | 0.07<br>(0-1)     | 0.38<br>(0-2)    | 0<br>(0-0)      | 0.27<br>(0-2.1)    |
| Southern Sub-Saharan Africa | 45 to 49 | 0.35<br>(0-1)     | 0.49<br>(0.3-1)  | 0.01<br>(0-0)   | 0.42<br>(0-2.1)    |
| Southern Sub-Saharan Africa | 50 to 54 | 0.74<br>(0-1)     | 0.57<br>(0.4-1)  | 0.02<br>(0-0)   | 0.49<br>(0.2-2)    |
| Southern Sub-Saharan Africa | 55 to 59 | 0.87<br>(0.5-1)   | 0.63<br>(0.4-1)  | 0.06<br>(0-1)   | 0.56<br>(0.3-2)    |
| Southern Sub-Saharan Africa | 60 to 64 | 0.95<br>(0.5-1)   | 0.68<br>(0.5-1)  | 0.18<br>(0-1)   | 0.64<br>(0.4-2)    |
| Southern Sub-Saharan Africa | 65 to 69 | 0.98<br>(0.5-1.5) | 0.69<br>(0.5-1)  | 0.34<br>(0-1)   | 0.64<br>(0.4-1.9)  |
| Southern Sub-Saharan Africa | 70 to 74 | 1.01<br>(0.5-2)   | 0.68<br>(0.5-1)  | 0.55<br>(0-1)   | 0.66<br>(0.5-1.01) |
| Southern Sub-Saharan Africa | 75 to 79 | 1.02<br>(0.5-2)   | 0.67<br>(0.5-1)  | 0.68<br>(0-1)   | 0.66<br>(0.5-1)    |
| Southern Sub-Saharan Africa | 80 plus  | 1.04<br>(0.5-2)   | 0.66<br>(0.5-1)  | 0.84<br>(0-1)   | 0.67<br>(0.5-1.5)  |
| Western Sub-Saharan Africa  | 15 to 19 | 0.01<br>(0-0)     | 0.17<br>(0-0.4)  | 0<br>(0-0)      | 0.02<br>(0-0.2)    |
| Western Sub-Saharan Africa  | 20 to 24 | 0.01<br>(0-0)     | 0.22<br>(0-0.5)  | 0<br>(0-0)      | 0.03<br>(0-0.2)    |
| Western Sub-Saharan Africa  | 25 to 29 | 0.02<br>(0-0)     | 0.24<br>(0-1)    | 0<br>(0-0)      | 0.05<br>(0-0.3)    |
| Western Sub-Saharan Africa  | 30 to 34 | 0.06<br>(0-1)     | 0.34<br>(0-0.6)  | 0<br>(0-0)      | 0.15<br>(0-0.4)    |
| Western Sub-Saharan Africa  | 35 to 39 | 0.07<br>(0-1)     | 0.35<br>(0-0.6)  | 0.01<br>(0-0)   | 0.22<br>(0-0.5)    |
| Western Sub-Saharan Africa  | 40 to 44 | 0.17<br>(0-1)     | 0.4<br>(0.1-0.7) | 0.01<br>(0-0)   | 0.36<br>(0-1)      |
| Western Sub-Saharan Africa  | 45 to 49 | 0.36<br>(0-1)     | 0.47<br>(0.3-1)  | 0.03<br>(0-0.5) | 0.43<br>(0.2-1)    |
| Western Sub-Saharan Africa  | 50 to 54 | 0.61<br>(0-1)     | 0.5<br>(0.4-0.8) | 0.06<br>(0-1)   | 0.48<br>(0.3-1)    |
| Western Sub-Saharan Africa  | 55 to 59 | 0.68<br>(0-1)     | 0.52<br>(0.4-1)  | 0.1<br>(0-1)    | 0.51<br>(0.3-1)    |
| Western Sub-Saharan Africa  | 60 to 64 | 0.91<br>(0.5-1)   | 0.59<br>(0.4-1)  | 0.24<br>(0-1)   | 0.53<br>(0.4-1)    |
| Western Sub-Saharan Africa  | 65 to 69 | 0.94<br>(0.5-1)   | 0.6<br>(0.5-1)   | 0.37<br>(0-1)   | 0.57<br>(0.4-1)    |
| Western Sub-Saharan Africa  | 70 to 74 | 0.95<br>(0.5-1)   | 0.61<br>(0.5-1)  | 0.46<br>(0-1)   | 0.58<br>(0.4-1)    |
| Western Sub-Saharan Africa  | 75 to 79 | 0.98<br>(0.5-1)   | 0.6<br>(0.5-1)   | 0.54<br>(0-1)   | 0.61<br>(0.5-1.01) |

|                            |         |                   |                 |               |                   |
|----------------------------|---------|-------------------|-----------------|---------------|-------------------|
| Western Sub-Saharan Africa | 80 plus | 0.99<br>(0.5-1.5) | 0.63<br>(0.5-1) | 0.73<br>(0-1) | 0.64<br>(0.5-1.8) |
|----------------------------|---------|-------------------|-----------------|---------------|-------------------|

Supplementary Table 3

| Location     | Age Group     | Male         | Female          | Both         |
|--------------|---------------|--------------|-----------------|--------------|
|              |               | 44·6         | 14·5            | 59·1         |
| Global       | 15 to 39      | (40·0–50·6)  | (11·2–17·5)     | (54·3–65·4)  |
|              |               | 27·1         | 7·30            | 34·4         |
| Global       | 40 to 64      | (24·2–29·8)  | (5·40–8·73)     | (29·8–37·8)  |
|              |               | 5·20         | 1·35            | 6·55         |
| Global       | 65 plus       | (3·97–6·40)  | (0·759–2·12)    | (4·79–8·43)  |
|              |               | 76·9         | 23·1            | 100          |
| Global       | 15 to 95 plus | (73·0–81·3)  | (18·7–27·0)     | (100–100)    |
|              |               | 54·7         | 14·0            | 68·7         |
| Central Asia | 15 to 39      | (48·4–60·4)  | (10·5–18·8)     | (63·4–74·1)  |
|              |               | 24·2         | 5·27            | 29·4         |
| Central Asia | 40 to 64      | (20·4–27·8)  | (3·86–6·69)     | (24·5–33·8)  |
|              |               | 1·69         | 0·169           | 1·86         |
| Central Asia | 65 plus       | (1·17–2·64)  | (0·0599–0·490)  | (1·24–3·14)  |
|              |               | 80·6         | 19·4            | 100          |
| Central Asia | 15 to 95 plus | (74·7–84·4)  | (15·6–25·3)     | (100–100)    |
|              |               | 58·2         | 11·2            | 69·4         |
| Armenia      | 15 to 39      | (48·6–66·3)  | (7·14–17·2)     | (61·6–77·0)  |
|              |               | 24·2         | 3·89            | 28·1         |
| Armenia      | 40 to 64      | (18·7–29·0)  | (2·11–6·19)     | (21·4–33·9)  |
|              |               | 2·42         | 0·104           | 2·52         |
| Armenia      | 65 plus       | (1·35–4·49)  | (0·0118–0·498)  | (1·37–4·92)  |
|              |               | 84·8         | 15·2            | 100          |
| Armenia      | 15 to 95 plus | (77·4–89·6)  | (10·4–22·6)     | (100–100)    |
|              |               | 52·3         | 11·1            | 63·4         |
| Azerbaijan   | 15 to 39      | (47·0–58·4)  | (8·36–14·6)     | (58·4–69·5)  |
|              |               | 29·3         | 4·52            | 33·8         |
| Azerbaijan   | 40 to 64      | (24·8–33·0)  | (3·08–6·06)     | (28·2–38·1)  |
|              |               | 2·62         | 0·166           | 2·79         |
| Azerbaijan   | 65 plus       | (1·71–3·56)  | (0·0496–0·353)  | (1·78–3·92)  |
|              |               | 84·2         | 15·8            | 100          |
| Azerbaijan   | 15 to 95 plus | (80·6–87·5)  | (12·5–19·4)     | (100–100)    |
|              |               | 49·9         | 14·8            | 64·7         |
| Georgia      | 15 to 39      | (40·4–58·4)  | (8·19–23·1)     | (57·0–72·3)  |
|              |               | 27·1         | 4·16            | 31·3         |
| Georgia      | 40 to 64      | (22·2–32·0)  | (1·95–6·89)     | (25·0–37·2)  |
|              |               | 3·92         | 0·113           | 4·04         |
| Georgia      | 65 plus       | (2·38–6·56)  | (0·00541–0·624) | (2·39–7·24)  |
|              |               | 80·9         | 19·1            | 100          |
| Georgia      | 15 to 95 plus | (70·0–88·6)  | (11·4–30·0)     | (100–100)    |
|              |               | 46·0         | 22·0            | 68·1         |
| Kazakhstan   | 15 to 39      | (38·9–52·4)  | (17·1–28·6)     | (61·9–74·6)  |
|              |               | 20·8         | 9·14            | 30·0         |
| Kazakhstan   | 40 to 64      | (16·9–24·6)  | (6·68–11·5)     | (24·0–35·2)  |
|              |               | 1·62         | 0·380           | 2·00         |
| Kazakhstan   | 65 plus       | (1·01–2·63)  | (0·115–1·10)    | (1·17–3·69)  |
|              |               | 68·5         | 31·5            | 100          |
| Kazakhstan   | 15 to 95 plus | (61·5–73·8)  | (26·2–38·5)     | (100–100)    |
|              |               | 55·7         | 14·3            | 70·0         |
| Kyrgyzstan   | 15 to 39      | (48·2–61·8)  | (9·58–21·1)     | (64·1–75·7)  |
|              |               | 23·3         | 5·35            | 28·6         |
| Kyrgyzstan   | 40 to 64      | (19·1–27·5)  | (3·46–7·37)     | (23·3–33·9)  |
|              |               | 1·33         | 0·0824          | 1·41         |
| Kyrgyzstan   | 65 plus       | (0·868–2·04) | (0·0156–0·288)  | (0·895–2·31) |
|              |               | 80·3         | 19·7            | 100          |
| Kyrgyzstan   | 15 to 95 plus | (72·3–85·9)  | (14·1–27·7)     | (100–100)    |
|              |               | 47·4         | 20·9            | 68·3         |
| Mongolia     | 15 to 39      | (41·1–52·7)  | (16·1–26·6)     | (62·9–73·4)  |

|                        |               |                        |                            |                        |
|------------------------|---------------|------------------------|----------------------------|------------------------|
| Mongolia               | 40 to 64      | 22.0<br>(18.5–25.4)    | 8.34<br>(6.14–10.6)        | 30.4<br>(25.5–35.1)    |
| Mongolia               | 65 plus       | 1.19<br>(0.787–1.90)   | 0.204<br>(0.0683–0.542)    | 1.40<br>(0.866–2.39)   |
| Mongolia               | 15 to 95 plus | 70.6<br>(63.8–75.6)    | 29.4<br>(24.4–36.2)        | 100<br>(100–100)       |
| Tajikistan             | 15 to 39      | 69.9<br>(64.8–74.5)    | 4.08<br>(2.64–5.89)        | 74.0<br>(69.2–78.2)    |
| Tajikistan             | 40 to 64      | 24.5<br>(20.4–28.9)    | 0.956<br>(0.610–1.40)      | 25.5<br>(21.3–30.1)    |
| Tajikistan             | 65 plus       | 0.534<br>(0.332–0.827) | 0.0192<br>(0.00558–0.0480) | 0.553<br>(0.341–0.865) |
| Tajikistan             | 15 to 95 plus | 94.9<br>(93.1–96.4)    | 5.06<br>(3.56–6.94)        | 100<br>(100–100)       |
| Turkmenistan           | 15 to 39      | 57.9<br>(50.3–65.0)    | 13.0<br>(8.50–18.9)        | 70.9<br>(64.8–76.7)    |
| Turkmenistan           | 40 to 64      | 22.7<br>(18.9–26.6)    | 4.71<br>(2.83–6.86)        | 27.4<br>(22.3–32.6)    |
| Turkmenistan           | 65 plus       | 1.55<br>(0.944–2.56)   | 0.0988<br>(0.0157–0.345)   | 1.65<br>(0.979–2.89)   |
| Turkmenistan           | 15 to 95 plus | 82.2<br>(75.1–87.4)    | 17.8<br>(12.6–24.9)        | 100<br>(100–100)       |
| Uzbekistan             | 15 to 39      | 61.8<br>(55.5–67.8)    | 8.71<br>(5.74–12.9)        | 70.5<br>(64.9–75.9)    |
| Uzbekistan             | 40 to 64      | 25.4<br>(20.9–29.9)    | 2.77<br>(1.74–4.01)        | 28.2<br>(23.2–33.2)    |
| Uzbekistan             | 65 plus       | 1.26<br>(0.782–2.08)   | 0.0481<br>(0.0101–0.166)   | 1.31<br>(0.793–2.23)   |
| Uzbekistan             | 15 to 95 plus | 88.5<br>(84.0–91.8)    | 11.5<br>(8.20–16.0)        | 100<br>(100–100)       |
| Central Europe         | 15 to 39      | 32.4<br>(28.0–36.2)    | 19.4<br>(15.3–22.9)        | 51.8<br>(46.3–56.8)    |
| Central Europe         | 40 to 64      | 27.4<br>(25.5–29.7)    | 12.2<br>(10.1–15.5)        | 39.6<br>(36.5–43.2)    |
| Central Europe         | 65 plus       | 6.86<br>(5.27–8.65)    | 1.74<br>(0.888–3.21)       | 8.59<br>(6.24–11.8)    |
| Central Europe         | 15 to 95 plus | 66.7<br>(61.6–71.0)    | 33.3<br>(29.0–38.4)        | 100<br>(100–100)       |
| Albania                | 15 to 39      | 45.4<br>(38.1–52.7)    | 17.2<br>(11.1–22.2)        | 62.6<br>(54.3–70.1)    |
| Albania                | 40 to 64      | 26.3<br>(22.4–30.2)    | 5.08<br>(3.02–8.37)        | 31.4<br>(26.1–36.8)    |
| Albania                | 65 plus       | 5.64<br>(3.39–8.59)    | 0.347<br>(0.0611–1.01)     | 5.98<br>(3.47–9.47)    |
| Albania                | 15 to 95 plus | 77.4<br>(71.2–83.9)    | 22.6<br>(16.1–28.8)        | 100<br>(100–100)       |
| Bosnia and Herzegovina | 15 to 39      | 39.6<br>(34.3–44.4)    | 13.7<br>(10.3–17.2)        | 53.3<br>(47.4–58.5)    |
| Bosnia and Herzegovina | 40 to 64      | 31.4<br>(28.8–34.1)    | 7.61<br>(5.45–10.6)        | 39.0<br>(35.4–43.1)    |
| Bosnia and Herzegovina | 65 plus       | 6.92<br>(5.11–9.15)    | 0.750<br>(0.296–1.54)      | 7.67<br>(5.50–10.5)    |
| Bosnia and Herzegovina | 15 to 95 plus | 77.9<br>(73.2–82.1)    | 22.1<br>(17.9–26.8)        | 100<br>(100–100)       |
| Bulgaria               | 15 to 39      | 29.1<br>(25.4–32.2)    | 17.7<br>(14.5–21.0)        | 46.7<br>(41.7–51.5)    |
| Bulgaria               | 40 to 64      | 29.0<br>(27.2–31.0)    | 13.8<br>(11.6–16.7)        | 42.7<br>(40.1–45.8)    |
| Bulgaria               | 65 plus       | 8.31<br>(6.56–10.2)    | 2.22<br>(1.12–3.85)        | 10.5<br>(7.85–13.9)    |
| Bulgaria               | 15 to 95 plus | 66.3<br>(62.1–70.0)    | 33.7<br>(30.0–37.9)        | 100<br>(100–100)       |



|                 |               |                     |                       |                     |
|-----------------|---------------|---------------------|-----------------------|---------------------|
| Croatia         | 15 to 39      | 33.4<br>(27.7–38.8) | 20.2<br>(14.8–24.8)   | 53.6<br>(46.7–60.3) |
| Croatia         | 40 to 64      | 25.9<br>(23.5–28.7) | 11.6<br>(8.79–15.1)   | 37.6<br>(33.5–42.1) |
| Croatia         | 65 plus       | 7.05<br>(4.87–9.51) | 1.77<br>(0.696–3.79)  | 8.82<br>(5.70–13.1) |
| Croatia         | 15 to 95 plus | 66.4<br>(60.8–72.2) | 33.6<br>(27.8–39.2)   | 100<br>(100–100)    |
| Czechia         | 15 to 39      | 27.5<br>(23.7–30.8) | 20.0<br>(16.5–23.4)   | 47.5<br>(42.4–52.2) |
| Czechia         | 40 to 64      | 27.1<br>(25.3–29.0) | 14.7<br>(12.6–17.9)   | 41.7<br>(39.0–44.7) |
| Czechia         | 65 plus       | 8.13<br>(6.50–10.0) | 2.60<br>(1.40–4.52)   | 10.7<br>(8.02–14.4) |
| Czechia         | 15 to 95 plus | 62.7<br>(58.1–66.6) | 37.3<br>(33.4–41.9)   | 100<br>(100–100)    |
| Hungary         | 15 to 39      | 30.9<br>(26.2–35.0) | 19.3<br>(15.0–23.0)   | 50.2<br>(44.4–55.5) |
| Hungary         | 40 to 64      | 28.1<br>(26.1–30.5) | 12.4<br>(10.0–16.3)   | 40.6<br>(37.3–44.3) |
| Hungary         | 65 plus       | 7.27<br>(5.50–9.34) | 2.00<br>(0.930–3.72)  | 9.26<br>(6.48–12.8) |
| Hungary         | 15 to 95 plus | 66.3<br>(61.3–70.9) | 33.7<br>(29.1–38.7)   | 100<br>(100–100)    |
| Montenegro      | 15 to 39      | 37.4<br>(31.8–42.6) | 17.9<br>(13.7–21.9)   | 55.3<br>(48.9–61.3) |
| Montenegro      | 40 to 64      | 27.8<br>(25.3–30.3) | 9.43<br>(6.99–12.7)   | 37.3<br>(33.2–41.5) |
| Montenegro      | 65 plus       | 6.27<br>(4.42–8.42) | 1.22<br>(0.456–2.49)  | 7.49<br>(4.97–10.8) |
| Montenegro      | 15 to 95 plus | 71.5<br>(66.2–76.3) | 28.5<br>(23.7–33.8)   | 100<br>(100–100)    |
| North Macedonia | 15 to 39      | 40.9<br>(34.4–46.7) | 18.5<br>(13.5–23.2)   | 59.4<br>(52.6–65.6) |
| North Macedonia | 40 to 64      | 27.4<br>(24.5–30.6) | 7.17<br>(4.66–11.2)   | 34.6<br>(30.0–39.6) |
| North Macedonia | 65 plus       | 5.48<br>(3.80–7.54) | 0.549<br>(0.136–1.40) | 6.03<br>(3.95–8.88) |
| North Macedonia | 15 to 95 plus | 73.8<br>(67.4–79.8) | 26.2<br>(20.2–32.6)   | 100<br>(100–100)    |
| Poland          | 15 to 39      | 33.0<br>(28.6–36.9) | 21.1<br>(16.6–25.2)   | 54.1<br>(48.6–59.0) |
| Poland          | 40 to 64      | 25.9<br>(23.8–28.4) | 12.5<br>(10.0–16.0)   | 38.4<br>(35.1–41.9) |
| Poland          | 65 plus       | 5.97<br>(4.58–7.60) | 1.59<br>(0.721–3.05)  | 7.56<br>(5.43–10.6) |
| Poland          | 15 to 95 plus | 64.9<br>(59.5–69.7) | 35.1<br>(30.3–40.5)   | 100<br>(100–100)    |
| Romania         | 15 to 39      | 31.6<br>(26.8–35.7) | 17.9<br>(13.8–21.6)   | 49.5<br>(44.0–55.2) |
| Romania         | 40 to 64      | 29.0<br>(26.8–31.5) | 12.5<br>(9.89–16.0)   | 41.5<br>(38.3–45.2) |
| Romania         | 65 plus       | 7.08<br>(5.35–9.09) | 1.90<br>(0.856–3.53)  | 8.98<br>(6.43–12.4) |
| Romania         | 15 to 95 plus | 67.7<br>(62.2–72.5) | 32.3<br>(27.5–37.8)   | 100<br>(100–100)    |
| Serbia          | 15 to 39      | 38.1<br>(33.8–42.4) | 11.9<br>(9.15–15.0)   | 50.1<br>(45.0–54.8) |
| Serbia          | 40 to 64      | 32.1<br>(29.9–34.3) | 7.75<br>(5.90–10.0)   | 39.8<br>(36.8–43.0) |
| Serbia          | 65 plus       | 8.88<br>(6.96–11.2) | 1.23<br>(0.539–2.29)  | 10.1<br>(7.61–13.4) |

|                     |               |             |               |             |
|---------------------|---------------|-------------|---------------|-------------|
|                     |               | 79.1        | 20.9          | 100         |
| Serbia              | 15 to 95 plus | (75.2–82.7) | (17.3–24.8)   | (100–100)   |
|                     |               | 31.3        | 22.4          | 53.7        |
| Slovakia            | 15 to 39      | (26.6–35.2) | (17.7–26.6)   | (48.0–58.8) |
|                     |               | 25.8        | 13.1          | 38.9        |
| Slovakia            | 40 to 64      | (23.6–28.5) | (10.7–17.0)   | (35.4–43.0) |
|                     |               | 6.08        | 1.31          | 7.39        |
| Slovakia            | 65 plus       | (4.67–7.79) | (0.500–2.82)  | (5.26–10.4) |
|                     |               | 63.2        | 36.8          | 100         |
| Slovakia            | 15 to 95 plus | (57.5–68.3) | (31.7–42.5)   | (100–100)   |
|                     |               | 36.4        | 22.9          | 59.3        |
| Slovenia            | 15 to 39      | (27.5–46.9) | (16.2–30.4)   | (47.7–73.2) |
|                     |               | 25.0        | 9.93          | 34.9        |
| Slovenia            | 40 to 64      | (18.8–28.9) | (4.94–15.4)   | (24.8–42.6) |
|                     |               | 5.03        | 0.784         | 5.82        |
| Slovenia            | 65 plus       | (1.80–8.37) | (0.0518–2.40) | (1.85–10.7) |
|                     |               | 66.4        | 33.6          | 100         |
| Slovenia            | 15 to 95 plus | (58.6–74.6) | (25.4–41.4)   | (100–100)   |
|                     |               | 34.6        | 24.9          | 59.6        |
| Eastern Europe      | 15 to 39      | (29.4–39.3) | (19.8–28.9)   | (52.2–65.2) |
|                     |               | 23.4        | 13.5          | 36.9        |
| Eastern Europe      | 40 to 64      | (20.4–26.3) | (10.8–17.4)   | (32.0–42.0) |
|                     |               | 3.02        | 0.535         | 3.55        |
| Eastern Europe      | 65 plus       | (2.17–4.78) | (0.195–1.64)  | (2.41–6.33) |
|                     |               | 61.0        | 39.0          | 100         |
| Eastern Europe      | 15 to 95 plus | (56.4–66.2) | (33.8–43.6)   | (100–100)   |
|                     |               | 33.4        | 24.9          | 58.3        |
| Belarus             | 15 to 39      | (27.8–38.6) | (19.6–29.4)   | (50.0–64.8) |
|                     |               | 22.7        | 15.2          | 37.9        |
| Belarus             | 40 to 64      | (19.5–25.9) | (12.2–19.3)   | (32.4–43.8) |
|                     |               | 2.93        | 0.852         | 3.78        |
| Belarus             | 65 plus       | (2.00–4.64) | (0.326–2.27)  | (2.36–6.97) |
|                     |               | 59.0        | 41.0          | 100         |
| Belarus             | 15 to 95 plus | (54.2–64.2) | (35.8–45.8)   | (100–100)   |
|                     |               | 32.9        | 25.6          | 58.5        |
| Estonia             | 15 to 39      | (27.7–37.2) | (21.1–29.3)   | (50.5–64.3) |
|                     |               | 22.4        | 14.8          | 37.2        |
| Estonia             | 40 to 64      | (19.7–24.9) | (12.1–18.4)   | (32.4–42.0) |
|                     |               | 3.49        | 0.840         | 4.33        |
| Estonia             | 65 plus       | (2.42–6.00) | (0.258–2.72)  | (2.74–9.01) |
|                     |               | 58.8        | 41.2          | 100         |
| Estonia             | 15 to 95 plus | (55.1–63.1) | (36.9–44.9)   | (100–100)   |
|                     |               | 30.5        | 23.3          | 53.8        |
| Latvia              | 15 to 39      | (25.8–34.2) | (19.2–26.7)   | (46.7–59.1) |
|                     |               | 24.4        | 15.8          | 40.2        |
| Latvia              | 40 to 64      | (22.1–26.7) | (13.0–19.5)   | (36.0–44.5) |
|                     |               | 4.80        | 1.16          | 5.96        |
| Latvia              | 65 plus       | (3.81–6.67) | (0.473–3.35)  | (4.36–9.90) |
|                     |               | 59.7        | 40.3          | 100         |
| Latvia              | 15 to 95 plus | (55.6–64.0) | (36.0–44.4)   | (100–100)   |
|                     |               | 31.7        | 26.0          | 57.7        |
| Lithuania           | 15 to 39      | (26.1–36.3) | (20.4–30.1)   | (49.1–64.3) |
|                     |               | 22.7        | 15.0          | 37.7        |
| Lithuania           | 40 to 64      | (19.6–25.5) | (12.0–19.2)   | (32.2–43.4) |
|                     |               | 3.55        | 1.03          | 4.58        |
| Lithuania           | 65 plus       | (2.49–5.77) | (0.370–3.20)  | (2.94–9.00) |
|                     |               | 58.0        | 42.0          | 100         |
| Lithuania           | 15 to 95 plus | (53.7–62.8) | (37.2–46.3)   | (100–100)   |
|                     |               | 35.4        | 24.5          | 59.9        |
| Republic of Moldova | 15 to 39      | (30.3–39.9) | (20.3–28.1)   | (52.8–65.7) |
|                     |               | 22.3        | 14.0          | 36.3        |
| Republic of Moldova | 40 to 64      | (19.4–24.9) | (11.6–17.1)   | (31.6–41.2) |

|                          |               |                       |                         |                      |
|--------------------------|---------------|-----------------------|-------------------------|----------------------|
| Republic of Moldova      | 65 plus       | 3.00<br>(2.06–4.94)   | 0.839<br>(0.327–2.21)   | 3.84<br>(2.44–7.20)  |
| Republic of Moldova      | 15 to 95 plus | 60.7<br>(56.9–65.0)   | 39.3<br>(35.0–43.1)     | 100<br>(100–100)     |
| Russian Federation       | 15 to 39      | 34.4<br>(29.2–39.0)   | 24.8<br>(19.7–28.9)     | 59.2<br>(52.4–64.5)  |
| Russian Federation       | 40 to 64      | 23.9<br>(21.0–26.7)   | 13.3<br>(10.6–17.4)     | 37.2<br>(32.7–41.9)  |
| Russian Federation       | 65 plus       | 3.09<br>(2.23–4.77)   | 0.465<br>(0.130–1.51)   | 3.55<br>(2.38–6.26)  |
| Russian Federation       | 15 to 95 plus | 61.4<br>(56.6–66.7)   | 38.6<br>(33.3–43.4)     | 100<br>(100–100)     |
| Ukraine                  | 15 to 39      | 36.1<br>(29.7–41.7)   | 25.4<br>(19.9–30.1)     | 61.4<br>(52.4–69.0)  |
| Ukraine                  | 40 to 64      | 22.0<br>(18.1–25.6)   | 13.3<br>(10.4–17.3)     | 35.3<br>(29.1–41.7)  |
| Ukraine                  | 65 plus       | 2.64<br>(1.61–4.83)   | 0.575<br>(0.181–1.69)   | 3.22<br>(1.84–6.45)  |
| Ukraine                  | 15 to 95 plus | 60.7<br>(56.1–66.2)   | 39.3<br>(33.8–43.9)     | 100<br>(100–100)     |
| Australasia              | 15 to 39      | 28.3<br>(24.6–31.9)   | 26.3<br>(22.5–29.7)     | 54.6<br>(47.2–61.1)  |
| Australasia              | 40 to 64      | 18.8<br>(16.7–21.2)   | 17.9<br>(14.6–21.4)     | 36.8<br>(32.5–41.4)  |
| Australasia              | 65 plus       | 5.12<br>(3.68–7.10)   | 3.54<br>(2.20–5.11)     | 8.67<br>(6.13–12.0)  |
| Australasia              | 15 to 95 plus | 52.3<br>(49.4–55.6)   | 47.7<br>(44.4–50.6)     | 100<br>(100–100)     |
| Australia                | 15 to 39      | 28.2<br>(24.4–31.8)   | 26.4<br>(22.5–29.8)     | 54.5<br>(47.1–61.0)  |
| Australia                | 40 to 64      | 19.0<br>(16.9–21.4)   | 17.8<br>(14.3–21.4)     | 36.8<br>(32.4–41.4)  |
| Australia                | 65 plus       | 5.22<br>(3.76–7.20)   | 3.47<br>(2.06–5.05)     | 8.68<br>(6.12–12.2)  |
| Australia                | 15 to 95 plus | 52.4<br>(49.5–56.0)   | 47.6<br>(44.0–50.5)     | 100<br>(100–100)     |
| New Zealand              | 15 to 39      | 28.9<br>(25.1–32.3)   | 25.8<br>(22.3–29.1)     | 54.7<br>(47.6–60.9)  |
| New Zealand              | 40 to 64      | 18.0<br>(15.5–20.8)   | 18.7<br>(15.9–21.9)     | 36.7<br>(32.7–41.3)  |
| New Zealand              | 65 plus       | 4.64<br>(3.25–6.64)   | 3.92<br>(2.67–5.30)     | 8.57<br>(6.03–11.9)  |
| New Zealand              | 15 to 95 plus | 51.5<br>(49.0–54.0)   | 48.5<br>(46.0–51.0)     | 100<br>(100–100)     |
| High-income Asia Pacific | 15 to 39      | 25.6<br>(22.0–28.5)   | 18.2<br>(14.0–21.1)     | 43.8<br>(36.7–48.7)  |
| High-income Asia Pacific | 40 to 64      | 25.4<br>(23.0–28.8)   | 17.2<br>(15.1–20.3)     | 42.6<br>(39.5–47.3)  |
| High-income Asia Pacific | 65 plus       | 8.76<br>(6.75–11.1)   | 4.84<br>(3.53–6.46)     | 13.6<br>(10.5–17.6)  |
| High-income Asia Pacific | 15 to 95 plus | 59.7<br>(56.3–63.0)   | 40.3<br>(37.0–43.7)     | 100<br>(100–100)     |
| Brunei Darussalam        | 15 to 39      | 53.1<br>(41.9–66.5)   | 19.7<br>(14.1–26.5)     | 72.8<br>(61.2–90.7)  |
| Brunei Darussalam        | 40 to 64      | 17.0<br>(4.05–25.4)   | 8.54<br>(4.72–13.3)     | 25.6<br>(9.09–36.5)  |
| Brunei Darussalam        | 65 plus       | 1.11<br>(0.0469–2.17) | 0.529<br>(0.0770–0.975) | 1.64<br>(0.134–3.02) |
| Brunei Darussalam        | 15 to 95 plus | 71.2<br>(64.2–77.2)   | 28.8<br>(22.8–35.8)     | 100<br>(100–100)     |
| Japan                    | 15 to 39      | 23.7<br>(19.6–27.0)   | 19.2<br>(14.5–22.6)     | 43.0<br>(34.7–48.8)  |

|                           |               |             |              |             |
|---------------------------|---------------|-------------|--------------|-------------|
|                           |               | 23.4        | 18.3         | 41.7        |
| Japan                     | 40 to 64      | (20.8–26.8) | (15.8–21.8)  | (38.2–46.8) |
|                           |               | 9.65        | 5.68         | 15.3        |
| Japan                     | 65 plus       | (7.16–12.6) | (4.03–7.71)  | (11.4–20.3) |
|                           |               | 56.8        | 43.2         | 100         |
| Japan                     | 15 to 95 plus | (53.1–60.3) | (39.7–46.9)  | (100–100)   |
|                           |               | 30.2        | 14.9         | 45.1        |
| Republic of Korea         | 15 to 39      | (27.4–32.6) | (11.8–17.7)  | (40.6–48.6) |
|                           |               | 31.2        | 14.4         | 45.6        |
| Republic of Korea         | 40 to 64      | (28.8–34.2) | (12.1–17.4)  | (42.7–49.3) |
|                           |               | 6.63        | 2.68         | 9.31        |
| Republic of Korea         | 65 plus       | (5.62–7.89) | (1.95–3.54)  | (7.77–10.9) |
|                           |               | 68.0        | 32.0         | 100         |
| Republic of Korea         | 15 to 95 plus | (64.7–71.2) | (28.8–35.3)  | (100–100)   |
|                           |               | 37.0        | 24.1         | 61.1        |
| Singapore                 | 15 to 39      | (29.5–42.3) | (17.5–29.9)  | (48.7–68.6) |
|                           |               | 22.2        | 13.4         | 35.6        |
| Singapore                 | 40 to 64      | (17.0–29.3) | (10.2–17.9)  | (29.1–46.3) |
|                           |               | 2.39        | 0.940        | 3.33        |
| Singapore                 | 65 plus       | (1.33–3.95) | (0.507–1.61) | (1.92–5.39) |
|                           |               | 61.6        | 38.4         | 100         |
| Singapore                 | 15 to 95 plus | (55.8–66.8) | (33.2–44.2)  | (100–100)   |
|                           |               | 32.3        | 25.2         | 57.5        |
| High-income North America | 15 to 39      | (27.9–36.2) | (20.3–28.5)  | (50.5–63.4) |
|                           |               | 20.1        | 14.5         | 34.6        |
| High-income North America | 40 to 64      | (17.8–22.6) | (12.4–17.3)  | (30.8–39.2) |
|                           |               | 4.77        | 3.18         | 7.95        |
| High-income North America | 65 plus       | (3.52–6.74) | (2.02–4.81)  | (5.58–11.4) |
|                           |               | 57.2        | 42.8         | 100         |
| High-income North America | 15 to 95 plus | (53.8–60.9) | (39.1–46.2)  | (100–100)   |
|                           |               | 31.6        | 24.7         | 56.3        |
| Canada                    | 15 to 39      | (26.9–35.9) | (19.4–28.6)  | (48.7–62.6) |
|                           |               | 20.7        | 14.8         | 35.6        |
| Canada                    | 40 to 64      | (18.1–23.7) | (12.4–17.9)  | (31.3–40.8) |
|                           |               | 5.08        | 3.02         | 8.11        |
| Canada                    | 65 plus       | (3.67–7.30) | (1.72–4.85)  | (5.49–11.9) |
|                           |               | 57.4        | 42.6         | 100         |
| Canada                    | 15 to 95 plus | (53.5–61.7) | (38.3–46.5)  | (100–100)   |
|                           |               | 35.8        | 26.2         | 62.0        |
| Greenland                 | 15 to 39      | (30.7–42.3) | (20.3–30.7)  | (54.0–70.6) |
|                           |               | 21.9        | 11.9         | 33.8        |
| Greenland                 | 40 to 64      | (17.6–25.7) | (8.70–15.2)  | (27.0–39.8) |
|                           |               | 3.03        | 1.21         | 4.25        |
| Greenland                 | 65 plus       | (1.74–4.50) | (0.505–2.07) | (2.30–6.41) |
|                           |               | 60.8        | 39.2         | 100         |
| Greenland                 | 15 to 95 plus | (56.9–65.5) | (34.5–43.1)  | (100–100)   |
|                           |               | 32.4        | 25.3         | 57.6        |
| United States of America  | 15 to 39      | (28.0–36.4) | (20.4–28.5)  | (50.7–63.6) |
|                           |               | 20.0        | 14.4         | 34.4        |
| United States of America  | 40 to 64      | (17.7–22.5) | (12.4–17.2)  | (30.6–39.0) |
|                           |               | 4.73        | 3.20         | 7.93        |
| United States of America  | 65 plus       | (3.48–6.70) | (2.03–4.80)  | (5.56–11.4) |
|                           |               | 57.1        | 42.9         | 100         |
| United States of America  | 15 to 95 plus | (53.8–60.8) | (39.2–46.2)  | (100–100)   |
|                           |               | 36.4        | 28.0         | 64.5        |
| Southern Latin America    | 15 to 39      | (32.1–40.6) | (24.0–30.9)  | (58.4–69.0) |
|                           |               | 17.9        | 11.9         | 29.8        |
| Southern Latin America    | 40 to 64      | (15.8–20.4) | (9.84–15.3)  | (26.3–35.1) |
|                           |               | 3.65        | 2.07         | 5.72        |
| Southern Latin America    | 65 plus       | (2.66–4.73) | (1.34–3.00)  | (4.11–7.66) |
|                           |               | 58.0        | 42.0         | 100         |
| Southern Latin America    | 15 to 95 plus | (54.8–62.2) | (37.8–45.2)  | (100–100)   |

|                |               |             |             |             |
|----------------|---------------|-------------|-------------|-------------|
|                |               | 37.3        | 29.3        | 66.5        |
| Argentina      | 15 to 39      | (32.7–41.5) | (25.2–32.5) | (60.1–71.3) |
|                |               | 17.0        | 11.3        | 28.2        |
| Argentina      | 40 to 64      | (14.7–19.6) | (9.01–14.8) | (24.4–33.8) |
|                |               | 3.33        | 1.89        | 5.22        |
| Argentina      | 65 plus       | (2.33–4.38) | (1.14–2.87) | (3.64–7.18) |
|                |               | 57.6        | 42.4        | 100         |
| Argentina      | 15 to 95 plus | (54.0–62.0) | (38.0–46.0) | (100–100)   |
|                |               | 34.6        | 25.8        | 60.4        |
| Chile          | 15 to 39      | (30.5–38.8) | (21.5–28.8) | (54.6–65.0) |
|                |               | 19.8        | 13.3        | 33.1        |
| Chile          | 40 to 64      | (17.7–22.1) | (11.1–16.5) | (29.4–37.8) |
|                |               | 4.21        | 2.35        | 6.56        |
| Chile          | 65 plus       | (3.20–5.30) | (1.54–3.28) | (4.85–8.40) |
|                |               | 58.6        | 41.4        | 100         |
| Chile          | 15 to 95 plus | (55.4–62.8) | (37.2–44.6) | (100–100)   |
|                |               | 35.1        | 23.4        | 58.5        |
| Uruguay        | 15 to 39      | (30.5–39.4) | (19.6–26.8) | (52.3–63.8) |
|                |               | 20.5        | 12.9        | 33.3        |
| Uruguay        | 40 to 64      | (18.1–23.0) | (10.6–16.3) | (29.7–38.4) |
|                |               | 5.12        | 3.04        | 8.16        |
| Uruguay        | 65 plus       | (3.83–6.54) | (1.92–4.42) | (5.89–10.8) |
|                |               | 60.7        | 39.3        | 100         |
| Uruguay        | 15 to 95 plus | (57.1–64.5) | (35.5–42.9) | (100–100)   |
|                |               | 26.6        | 20.6        | 47.3        |
| Western Europe | 15 to 39      | (23.2–30.0) | (17.0–23.6) | (41.4–51.7) |
|                |               | 22.8        | 18.0        | 40.9        |
| Western Europe | 40 to 64      | (20.7–25.1) | (15.6–21.6) | (38.2–44.8) |
|                |               | 7.19        | 4.67        | 11.9        |
| Western Europe | 65 plus       | (5.53–9.27) | (3.36–6.04) | (8.91–15.1) |
|                |               | 56.7        | 43.3        | 100         |
| Western Europe | 15 to 95 plus | (52.5–61.1) | (38.9–47.5) | (100–100)   |
|                |               | 25.1        | 19.6        | 44.6        |
| Andorra        | 15 to 39      | (21.6–28.6) | (15.9–22.7) | (39.1–49.0) |
|                |               | 26.9        | 20.1        | 47.0        |
| Andorra        | 40 to 64      | (24.1–30.0) | (16.8–24.5) | (43.7–51.3) |
|                |               | 5.39        | 2.96        | 8.35        |
| Andorra        | 65 plus       | (3.96–7.12) | (1.98–3.97) | (6.12–11.0) |
|                |               | 57.4        | 42.6        | 100         |
| Andorra        | 15 to 95 plus | (52.6–62.4) | (37.6–47.4) | (100–100)   |
|                |               | 27.7        | 20.7        | 48.4        |
| Austria        | 15 to 39      | (23.9–31.2) | (17.1–23.9) | (42.7–53.0) |
|                |               | 22.8        | 18.3        | 41.0        |
| Austria        | 40 to 64      | (20.5–25.2) | (15.5–21.9) | (37.9–45.2) |
|                |               | 6.12        | 4.42        | 10.5        |
| Austria        | 65 plus       | (4.55–8.03) | (3.17–5.77) | (7.89–13.6) |
|                |               | 56.6        | 43.4        | 100         |
| Austria        | 15 to 95 plus | (52.5–61.0) | (39.0–47.5) | (100–100)   |
|                |               | 26.7        | 22.0        | 48.8        |
| Belgium        | 15 to 39      | (22.9–30.3) | (18.2–25.3) | (42.6–53.8) |
|                |               | 22.0        | 18.2        | 40.2        |
| Belgium        | 40 to 64      | (19.7–24.3) | (15.6–22.2) | (37.2–44.4) |
|                |               | 6.35        | 4.66        | 11.0        |
| Belgium        | 65 plus       | (4.58–8.43) | (3.21–6.31) | (7.95–14.6) |
|                |               | 55.1        | 44.9        | 100         |
| Belgium        | 15 to 95 plus | (50.7–59.7) | (40.3–49.3) | (100–100)   |
|                |               | 36.0        | 22.7        | 58.7        |
| Cyprus         | 15 to 39      | (31.0–41.1) | (18.0–26.9) | (52.3–64.0) |
|                |               | 20.8        | 13.5        | 34.4        |
| Cyprus         | 40 to 64      | (18.2–23.7) | (10.3–17.9) | (30.8–39.4) |
|                |               | 5.05        | 1.88        | 6.93        |
| Cyprus         | 65 plus       | (3.53–6.83) | (1.10–2.79) | (4.71–9.48) |

|         |               |                     |                     |                     |
|---------|---------------|---------------------|---------------------|---------------------|
| Cyprus  | 15 to 95 plus | 61·9<br>(56·4–68·4) | 38·1<br>(31·6–43·6) | 100<br>(100–100)    |
| Denmark | 15 to 39      | 27·8<br>(23·2–32·1) | 23·2<br>(18·9–26·8) | 51·0<br>(43·8–56·9) |
| Denmark | 40 to 64      | 19·7<br>(17·0–22·4) | 18·2<br>(15·0–22·4) | 37·8<br>(34·0–42·7) |
| Denmark | 65 plus       | 6·24<br>(4·26–8·65) | 4·97<br>(3·34–6·81) | 11·2<br>(7·79–15·4) |
| Denmark | 15 to 95 plus | 53·7<br>(48·8–58·5) | 46·3<br>(41·5–51·2) | 100<br>(100–100)    |
| Finland | 15 to 39      | 27·8<br>(23·3–32·2) | 23·1<br>(18·6–27·0) | 50·9<br>(44·1–56·8) |
| Finland | 40 to 64      | 20·8<br>(18·2–23·5) | 17·7<br>(14·7–22·0) | 38·4<br>(34·9–42·8) |
| Finland | 65 plus       | 6·21<br>(4·12–8·69) | 4·48<br>(2·82–6·29) | 10·7<br>(7·06–14·9) |
| Finland | 15 to 95 plus | 54·8<br>(50·1–60·2) | 45·2<br>(39·8–49·9) | 100<br>(100–100)    |
| France  | 15 to 39      | 26·5<br>(22·7–30·0) | 21·3<br>(17·3–24·5) | 47·8<br>(42·1–52·6) |
| France  | 40 to 64      | 21·8<br>(19·7–23·9) | 17·6<br>(14·8–21·4) | 39·4<br>(36·4–43·2) |
| France  | 65 plus       | 7·96<br>(6·15–10·1) | 4·86<br>(3·34–6·52) | 12·8<br>(9·68–16·6) |
| France  | 15 to 95 plus | 56·2<br>(51·8–61·1) | 43·8<br>(38·9–48·2) | 100<br>(100–100)    |
| Germany | 15 to 39      | 25·6<br>(22·4–28·5) | 19·5<br>(16·0–22·4) | 45·1<br>(40·2–49·3) |
| Germany | 40 to 64      | 22·8<br>(21·1–25·0) | 18·5<br>(16·1–22·0) | 41·4<br>(39·0–44·6) |
| Germany | 65 plus       | 7·93<br>(6·33–9·77) | 5·60<br>(4·15–7·25) | 13·5<br>(10·5–16·9) |
| Germany | 15 to 95 plus | 56·4<br>(52·6–60·3) | 43·6<br>(39·7–47·4) | 100<br>(100–100)    |
| Greece  | 15 to 39      | 27·8<br>(23·1–32·6) | 22·1<br>(17·5–26·2) | 49·9<br>(42·7–56·0) |
| Greece  | 40 to 64      | 23·7<br>(20·7–27·0) | 17·0<br>(13·1–22·0) | 40·7<br>(36·8–45·7) |
| Greece  | 65 plus       | 6·73<br>(4·68–9·39) | 2·68<br>(1·49–4·14) | 9·41<br>(6·37–13·3) |
| Greece  | 15 to 95 plus | 58·3<br>(52·5–64·8) | 41·7<br>(35·2–47·5) | 100<br>(100–100)    |
| Iceland | 15 to 39      | 31·2<br>(26·7–35·9) | 24·7<br>(19·9–28·7) | 55·9<br>(49·2–61·3) |
| Iceland | 40 to 64      | 19·7<br>(17·0–22·9) | 16·6<br>(13·7–20·8) | 36·3<br>(32·4–41·4) |
| Iceland | 65 plus       | 4·73<br>(3·19–6·62) | 3·03<br>(1·93–4·24) | 7·76<br>(5·22–10·6) |
| Iceland | 15 to 95 plus | 55·6<br>(50·7–61·4) | 44·4<br>(38·6–49·3) | 100<br>(100–100)    |
| Ireland | 15 to 39      | 28·1<br>(24·6–31·4) | 25·1<br>(21·7–28·0) | 53·1<br>(47·6–57·5) |
| Ireland | 40 to 64      | 20·7<br>(18·5–23·1) | 18·5<br>(15·8–22·0) | 39·2<br>(36·2–43·1) |
| Ireland | 65 plus       | 4·64<br>(3·33–6·24) | 3·00<br>(2·02–4·01) | 7·64<br>(5·45–10·0) |
| Ireland | 15 to 95 plus | 53·4<br>(49·3–57·6) | 46·6<br>(42·4–50·7) | 100<br>(100–100)    |
| Israel  | 15 to 39      | 41·0<br>(33·0–49·5) | 28·9<br>(22·2–34·7) | 69·9<br>(59·0–77·7) |
| Israel  | 40 to 64      | 14·2<br>(10·2–19·9) | 13·0<br>(8·63–18·9) | 27·2<br>(20·4–36·9) |

|             |               |                      |                       |                      |
|-------------|---------------|----------------------|-----------------------|----------------------|
| Israel      | 65 plus       | 1-74<br>(0-685-3-42) | 1-22<br>(0-537-2-09)  | 2-96<br>(1-32-5-41)  |
| Israel      | 15 to 95 plus | 56-9<br>(49-3-65-2)  | 43-1<br>(34-8-50-7)   | 100<br>(100-100)     |
| Italy       | 15 to 39      | 24-4<br>(20-8-27-6)  | 16-2<br>(12-5-19-3)   | 40-6<br>(35-1-45-7)  |
| Italy       | 40 to 64      | 26-4<br>(24-0-28-9)  | 18-3<br>(15-7-21-8)   | 44-8<br>(42-0-48-4)  |
| Italy       | 65 plus       | 8-93<br>(6-90-11-5)  | 5-71<br>(4-37-7-25)   | 14-6<br>(11-4-18-4)  |
| Italy       | 15 to 95 plus | 59-7<br>(55-4-64-2)  | 40-3<br>(35-8-44-6)   | 100<br>(100-100)     |
| Luxembourg  | 15 to 39      | 28-4<br>(24-6-32-1)  | 22-6<br>(18-4-25-9)   | 51-0<br>(45-1-55-5)  |
| Luxembourg  | 40 to 64      | 22-8<br>(20-4-25-5)  | 17-5<br>(14-7-21-4)   | 40-3<br>(37-2-44-5)  |
| Luxembourg  | 65 plus       | 5-52<br>(4-15-7-11)  | 3-14<br>(2-09-4-37)   | 8-65<br>(6-34-11-2)  |
| Luxembourg  | 15 to 95 plus | 56-7<br>(52-3-61-8)  | 43-3<br>(38-2-47-7)   | 100<br>(100-100)     |
| Malta       | 15 to 39      | 31-6<br>(26-6-36-6)  | 22-9<br>(17-7-27-1)   | 54-5<br>(47-3-60-7)  |
| Malta       | 40 to 64      | 21-9<br>(19-1-25-2)  | 14-0<br>(10-9-18-5)   | 35-9<br>(32-0-40-8)  |
| Malta       | 65 plus       | 6-45<br>(4-40-8-81)  | 3-14<br>(1-90-4-61)   | 9-59<br>(6-55-13-2)  |
| Malta       | 15 to 95 plus | 60-0<br>(54-4-66-6)  | 40-0<br>(33-4-45-6)   | 100<br>(100-100)     |
| Monaco      | 15 to 39      | 27-2<br>(18-8-53-6)  | 22-0<br>(15-4-36-5)   | 49-2<br>(35-2-84-4)  |
| Monaco      | 40 to 64      | 21-5<br>(6-87-26-6)  | 19-0<br>(5-75-26-4)   | 40-5<br>(15-1-48-7)  |
| Monaco      | 65 plus       | 6-14<br>(0-102-11-2) | 4-16<br>(0-0378-8-07) | 10-3<br>(0-136-19-0) |
| Monaco      | 15 to 95 plus | 54-9<br>(45-5-65-2)  | 45-1<br>(34-8-54-5)   | 100<br>(100-100)     |
| Netherlands | 15 to 39      | 27-1<br>(23-1-31-0)  | 21-3<br>(17-2-24-8)   | 48-4<br>(41-7-54-0)  |
| Netherlands | 40 to 64      | 21-5<br>(18-9-24-2)  | 18-2<br>(15-3-22-3)   | 39-8<br>(36-4-44-3)  |
| Netherlands | 65 plus       | 6-76<br>(4-90-9-18)  | 5-06<br>(3-61-6-78)   | 11-8<br>(8-69-15-9)  |
| Netherlands | 15 to 95 plus | 55-4<br>(50-9-59-9)  | 44-6<br>(40-1-49-1)   | 100<br>(100-100)     |
| Norway      | 15 to 39      | 30-3<br>(25-4-35-1)  | 24-6<br>(20-2-28-5)   | 54-8<br>(47-2-61-3)  |
| Norway      | 40 to 64      | 19-6<br>(16-7-22-9)  | 17-5<br>(14-5-22-0)   | 37-1<br>(33-0-42-7)  |
| Norway      | 65 plus       | 4-51<br>(2-76-6-79)  | 3-52<br>(2-13-4-98)   | 8-03<br>(4-92-11-7)  |
| Norway      | 15 to 95 plus | 54-4<br>(49-4-59-8)  | 45-6<br>(40-2-50-6)   | 100<br>(100-100)     |
| Portugal    | 15 to 39      | 25-8<br>(22-6-28-9)  | 16-5<br>(13-0-19-6)   | 42-4<br>(37-6-46-4)  |
| Portugal    | 40 to 64      | 27-2<br>(25-0-29-8)  | 17-0<br>(14-1-20-8)   | 44-2<br>(41-5-47-4)  |
| Portugal    | 65 plus       | 9-26<br>(7-39-11-5)  | 4-15<br>(2-92-5-64)   | 13-4<br>(10-6-16-6)  |
| Portugal    | 15 to 95 plus | 62-3<br>(57-8-66-9)  | 37-7<br>(33-1-42-2)   | 100<br>(100-100)     |
| San Marino  | 15 to 39      | 26-2<br>(19-8-56-1)  | 21-5<br>(16-4-38-8)   | 47-7<br>(37-4-95-2)  |

|                                  |               |                      |                         |                     |
|----------------------------------|---------------|----------------------|-------------------------|---------------------|
| San Marino                       | 40 to 64      | 21·6<br>(0·726–25·9) | 20·2<br>(1·79–26·5)     | 41·8<br>(4·79–49·1) |
| San Marino                       | 65 plus       | 6·45<br>(0–9·67)     | 4·10<br>(0–6·54)        | 10·6<br>(0–15·9)    |
| San Marino                       | 15 to 95 plus | 54·3<br>(45·3–64·9)  | 45·7<br>(35·1–54·7)     | 100<br>(100–100)    |
| Spain                            | 15 to 39      | 25·6<br>(22·4–28·7)  | 19·0<br>(15·8–21·9)     | 44·7<br>(39·6–48·7) |
| Spain                            | 40 to 64      | 27·2<br>(24·7–30·0)  | 18·5<br>(15·5–22·3)     | 45·7<br>(42·9–49·5) |
| Spain                            | 65 plus       | 6·22<br>(4·68–8·23)  | 3·38<br>(2·33–4·55)     | 9·60<br>(7·19–12·6) |
| Spain                            | 15 to 95 plus | 59·1<br>(54·7–63·4)  | 40·9<br>(36·6–45·3)     | 100<br>(100–100)    |
| Sweden                           | 15 to 39      | 28·8<br>(24·3–32·9)  | 23·1<br>(18·9–26·7)     | 51·9<br>(44·8–57·7) |
| Sweden                           | 40 to 64      | 19·5<br>(16·9–22·1)  | 18·1<br>(15·3–22·0)     | 37·6<br>(34·1–42·1) |
| Sweden                           | 65 plus       | 5·68<br>(3·74–8·20)  | 4·85<br>(3·32–6·65)     | 10·5<br>(7·18–14·7) |
| Sweden                           | 15 to 95 plus | 54·0<br>(49·4–58·7)  | 46·0<br>(41·3–50·6)     | 100<br>(100–100)    |
| Switzerland                      | 15 to 39      | 27·5<br>(23·4–31·7)  | 21·4<br>(17·1–25·3)     | 49·0<br>(42·3–54·6) |
| Switzerland                      | 40 to 64      | 22·5<br>(19·8–25·4)  | 18·1<br>(15·2–22·3)     | 40·6<br>(37·3–45·1) |
| Switzerland                      | 65 plus       | 6·15<br>(4·42–8·35)  | 4·25<br>(2·81–5·89)     | 10·4<br>(7·36–14·1) |
| Switzerland                      | 15 to 95 plus | 56·2<br>(51·2–61·3)  | 43·8<br>(38·7–48·8)     | 100<br>(100–100)    |
| United Kingdom                   | 15 to 39      | 27·7<br>(24·1–31·2)  | 23·6<br>(19·9–26·7)     | 51·3<br>(45·3–56·4) |
| United Kingdom                   | 40 to 64      | 20·5<br>(18·3–22·7)  | 17·9<br>(15·4–21·7)     | 38·4<br>(35·6–42·2) |
| United Kingdom                   | 65 plus       | 6·30<br>(4·55–8·41)  | 4·07<br>(2·70–5·67)     | 10·4<br>(7·42–14·0) |
| United Kingdom                   | 15 to 95 plus | 54·5<br>(50·6–58·8)  | 45·5<br>(41·2–49·4)     | 100<br>(100–100)    |
| Andean Latin America             | 15 to 39      | 47·2<br>(40·4–53·6)  | 23·1<br>(17·5–28·0)     | 70·3<br>(65·5–74·4) |
| Andean Latin America             | 40 to 64      | 19·9<br>(17·7–22·7)  | 6·65<br>(4·76–8·97)     | 26·5<br>(23·1–30·8) |
| Andean Latin America             | 65 plus       | 2·65<br>(1·90–3·34)  | 0·522<br>(0·267–0·859)  | 3·17<br>(2·20–4·13) |
| Andean Latin America             | 15 to 95 plus | 69·8<br>(63·6–75·8)  | 30·2<br>(24·2–36·4)     | 100<br>(100–100)    |
| Bolivia (Plurinational State of) | 15 to 39      | 48·0<br>(40·0–55·4)  | 24·7<br>(17·9–31·0)     | 72·7<br>(67·1–77·4) |
| Bolivia (Plurinational State of) | 40 to 64      | 18·3<br>(15·7–21·4)  | 6·16<br>(4·16–8·77)     | 24·4<br>(20·3–29·2) |
| Bolivia (Plurinational State of) | 65 plus       | 2·43<br>(1·61–3·27)  | 0·449<br>(0·183–0·846)  | 2·88<br>(1·85–4·01) |
| Bolivia (Plurinational State of) | 15 to 95 plus | 68·7<br>(61·2–76·4)  | 31·3<br>(23·6–38·8)     | 100<br>(100–100)    |
| Ecuador                          | 15 to 39      | 55·4<br>(48·7–61·3)  | 16·0<br>(11·3–20·9)     | 71·4<br>(66·8–75·6) |
| Ecuador                          | 40 to 64      | 22·1<br>(19·1–25·5)  | 3·89<br>(2·63–5·67)     | 26·0<br>(22·3–30·4) |
| Ecuador                          | 65 plus       | 2·37<br>(1·68–3·05)  | 0·193<br>(0·0948–0·333) | 2·56<br>(1·79–3·35) |
| Ecuador                          | 15 to 95 plus | 79·9<br>(74·6–85·0)  | 20·1<br>(15·0–25·4)     | 100<br>(100–100)    |



|                     |               |                             |                             |                             |
|---------------------|---------------|-----------------------------|-----------------------------|-----------------------------|
| Peru                | 15 to 39      | 44.5<br>(37.8–51.2)<br>19.7 | 24.8<br>(18.9–29.6)<br>7.64 | 69.2<br>(64.4–73.7)<br>27.3 |
| Peru                | 40 to 64      | (17.5–22.4)<br>2.79         | (5.40–10.4)<br>0.645        | (23.6–31.4)<br>3.44         |
| Peru                | 65 plus       | (2.00–3.52)<br>67.0         | (0.316–1.06)<br>33.0        | (2.37–4.44)<br>100          |
| Peru                | 15 to 95 plus | (60.7–73.7)<br>52.4         | (26.3–39.3)<br>20.9         | (100–100)<br>73.3           |
| Caribbean           | 15 to 39      | (45.9–58.7)<br>19.5         | (16.0–25.4)<br>4.39         | (67.6–78.3)<br>23.9         |
| Caribbean           | 40 to 64      | (16.6–22.6)<br>2.55         | (2.82–6.03)<br>0.270        | (19.7–28.5)<br>2.82         |
| Caribbean           | 65 plus       | (1.72–3.67)<br>74.5         | (0.112–0.576)<br>25.5       | (1.85–4.26)<br>100          |
| Caribbean           | 15 to 95 plus | (69.5–79.8)<br>48.9         | (20.2–30.5)<br>20.5         | (100–100)<br>69.4           |
| Antigua and Barbuda | 15 to 39      | (42.0–55.4)<br>22.1         | (15.0–26.2)<br>5.53         | (63.4–75.1)<br>27.6         |
| Antigua and Barbuda | 40 to 64      | (18.8–25.7)<br>2.75         | (3.30–7.89)<br>0.284        | (22.9–32.5)<br>3.03         |
| Antigua and Barbuda | 65 plus       | (1.81–3.91)<br>73.7         | (0.0879–0.640)<br>26.3      | (1.94–4.50)<br>100          |
| Antigua and Barbuda | 15 to 95 plus | (67.6–80.1)<br>51.9         | (19.9–32.4)<br>21.7         | (100–100)<br>73.5           |
| Bahamas             | 15 to 39      | (42.8–62.5)<br>19.9         | (14.5–28.2)<br>4.57         | (65.9–81.5)<br>24.5         |
| Bahamas             | 40 to 64      | (15.1–24.0)<br>1.78         | (1.85–7.87)<br>0.193        | (17.6–30.9)<br>1.98         |
| Bahamas             | 65 plus       | (0.829–2.93)<br>73.5        | (0.0257–0.546)<br>26.5      | (0.858–3.41)<br>100         |
| Bahamas             | 15 to 95 plus | (66.4–82.1)<br>39.2         | (17.9–33.6)<br>20.6         | (100–100)<br>59.8           |
| Barbados            | 15 to 39      | (34.9–43.4)<br>25.1         | (16.1–24.9)<br>8.72         | (55.0–64.4)<br>33.8         |
| Barbados            | 40 to 64      | (22.7–27.6)<br>5.44         | (6.51–11.1)<br>0.981        | (30.2–37.4)<br>6.42         |
| Barbados            | 65 plus       | (4.22–6.83)<br>69.7         | (0.520–1.68)<br>30.3        | (4.85–8.30)<br>100          |
| Barbados            | 15 to 95 plus | (65.3–74.2)<br>55.1         | (25.8–34.7)<br>23.3         | (100–100)<br>78.4           |
| Belize              | 15 to 39      | (48.6–61.7)<br>16.4         | (17.4–29.0)<br>3.67         | (74.1–82.6)<br>20.1         |
| Belize              | 40 to 64      | (13.8–19.4)<br>1.45         | (2.27–5.20)<br>0.0963       | (16.2–23.9)<br>1.55         |
| Belize              | 65 plus       | (0.938–2.14)<br>72.9        | (0.0341–0.204)<br>27.1      | (0.994–2.30)<br>100         |
| Belize              | 15 to 95 plus | (67.1–79.2)<br>35.3         | (20.8–32.9)<br>18.0         | (100–100)<br>53.3           |
| Bermuda             | 15 to 39      | (29.9–41.3)<br>30.1         | (13.4–22.4)<br>9.10         | (47.3–59.9)<br>39.2         |
| Bermuda             | 40 to 64      | (27.4–33.2)<br>6.38         | (5.97–12.0)<br>1.08         | (34.4–43.3)<br>7.46         |
| Bermuda             | 65 plus       | (4.81–8.16)<br>71.8         | (0.405–2.12)<br>28.2        | (5.29–10.2)<br>100          |
| Bermuda             | 15 to 95 plus | (66.7–77.5)<br>45.7         | (22.5–33.3)<br>17.4         | (100–100)<br>63.2           |
| Cuba                | 15 to 39      | (38.9–52.6)<br>26.5         | (12.2–22.6)<br>5.85         | (56.1–69.7)<br>32.3         |
| Cuba                | 40 to 64      | (22.5–30.6)<br>4.10         | (3.62–8.33)<br>0.421        | (27.0–37.6)<br>4.52         |
| Cuba                | 65 plus       | (2.74–5.87)                 | (0.151–0.950)               | (2.93–6.77)                 |

|                       |               |                      |                         |                      |
|-----------------------|---------------|----------------------|-------------------------|----------------------|
| Cuba                  | 15 to 95 plus | 76.3<br>(70.7–82.1)  | 23.7<br>(17.9–29.3)     | 100<br>(100–100)     |
| Dominica              | 15 to 39      | 49.4<br>(42.3–56.3)  | 20.0<br>(14.1–25.6)     | 69.4<br>(63.1–75.6)  |
| Dominica              | 40 to 64      | 22.0<br>(18.5–25.4)  | 4.88<br>(2.82–7.07)     | 26.9<br>(21.9–31.9)  |
| Dominica              | 65 plus       | 3.34<br>(2.18–4.80)  | 0.386<br>(0.120–0.903)  | 3.73<br>(2.34–5.59)  |
| Dominica              | 15 to 95 plus | 74.7<br>(68.6–81.1)  | 25.3<br>(18.9–31.4)     | 100<br>(100–100)     |
| Dominican Republic    | 15 to 39      | 53.2<br>(46.8–59.4)  | 25.1<br>(20.0–29.5)     | 78.3<br>(72.9–83.1)  |
| Dominican Republic    | 40 to 64      | 15.7<br>(12.8–19.0)  | 4.37<br>(2.85–6.03)     | 20.1<br>(15.9–24.6)  |
| Dominican Republic    | 65 plus       | 1.42<br>(0.826–2.34) | 0.209<br>(0.0805–0.439) | 1.63<br>(0.915–2.77) |
| Dominican Republic    | 15 to 95 plus | 70.3<br>(65.8–75.6)  | 29.7<br>(24.4–34.2)     | 100<br>(100–100)     |
| Grenada               | 15 to 39      | 47.7<br>(42.8–52.5)  | 20.0<br>(15.4–24.7)     | 67.7<br>(63.5–71.8)  |
| Grenada               | 40 to 64      | 22.4<br>(19.8–25.0)  | 5.84<br>(4.23–7.74)     | 28.2<br>(24.7–31.7)  |
| Grenada               | 65 plus       | 3.48<br>(2.70–4.38)  | 0.602<br>(0.303–1.06)   | 4.08<br>(3.08–5.30)  |
| Grenada               | 15 to 95 plus | 73.6<br>(68.8–78.5)  | 26.4<br>(21.5–31.2)     | 100<br>(100–100)     |
| Guyana                | 15 to 39      | 55.4<br>(48.0–62.6)  | 20.2<br>(13.6–26.5)     | 75.6<br>(70.3–80.4)  |
| Guyana                | 40 to 64      | 19.4<br>(16.3–23.0)  | 3.11<br>(1.63–4.83)     | 22.5<br>(18.3–27.1)  |
| Guyana                | 65 plus       | 1.72<br>(1.00–2.64)  | 0.133<br>(0.0361–0.338) | 1.85<br>(1.04–2.93)  |
| Guyana                | 15 to 95 plus | 76.6<br>(69.8–83.5)  | 23.4<br>(16.5–30.2)     | 100<br>(100–100)     |
| Haiti                 | 15 to 39      | 60.2<br>(53.9–66.5)  | 19.6<br>(14.1–24.9)     | 79.8<br>(75.6–83.7)  |
| Haiti                 | 40 to 64      | 15.8<br>(13.2–18.7)  | 2.78<br>(1.63–4.04)     | 18.6<br>(15.3–22.1)  |
| Haiti                 | 65 plus       | 1.48<br>(0.964–2.11) | 0.126<br>(0.0472–0.277) | 1.61<br>(1.03–2.35)  |
| Haiti                 | 15 to 95 plus | 77.4<br>(72.0–83.3)  | 22.6<br>(16.7–28.0)     | 100<br>(100–100)     |
| Jamaica               | 15 to 39      | 57.8<br>(49.5–66.0)  | 20.6<br>(14.1–27.2)     | 78.3<br>(72.4–83.6)  |
| Jamaica               | 40 to 64      | 17.1<br>(13.5–21.1)  | 2.52<br>(1.24–3.95)     | 19.6<br>(15.1–24.5)  |
| Jamaica               | 65 plus       | 1.94<br>(1.08–3.16)  | 0.101<br>(0.0256–0.273) | 2.04<br>(1.10–3.40)  |
| Jamaica               | 15 to 95 plus | 76.8<br>(69.9–83.6)  | 23.2<br>(16.4–30.1)     | 100<br>(100–100)     |
| Puerto Rico           | 15 to 39      | 44.2<br>(38.2–50.4)  | 21.4<br>(16.1–26.1)     | 65.6<br>(59.8–71.1)  |
| Puerto Rico           | 40 to 64      | 23.0<br>(20.3–25.9)  | 5.43<br>(3.48–7.46)     | 28.4<br>(24.3–32.5)  |
| Puerto Rico           | 65 plus       | 5.57<br>(3.97–7.57)  | 0.439<br>(0.156–0.962)  | 6.01<br>(4.16–8.40)  |
| Puerto Rico           | 15 to 95 plus | 72.8<br>(67.4–78.5)  | 27.2<br>(21.5–32.6)     | 100<br>(100–100)     |
| Saint Kitts and Nevis | 15 to 39      | 54.7<br>(36.1–92.1)  | 22.1<br>(4.72–31.7)     | 76.7<br>(59.6–99.7)  |
| Saint Kitts and Nevis | 40 to 64      | 17.0<br>(0.283–25.5) | 4.49<br>(0–11.9)        | 21.5<br>(0.283–36.3) |

|                                  |               |                       |                         |                       |
|----------------------------------|---------------|-----------------------|-------------------------|-----------------------|
| Saint Kitts and Nevis            | 65 plus       | 1·53<br>(0·3-57)      | 0·250<br>(0-1·11)       | 1·78<br>(0-4·58)      |
| Saint Kitts and Nevis            | 15 to 95 plus | 73·2<br>(61·9-95·1)   | 26·8<br>(4·88-38·1)     | 100<br>(100-100)      |
| Saint Lucia                      | 15 to 39      | 39·8<br>(34·9-44·5)   | 24·6<br>(20·5-28·7)     | 64·4<br>(59·0-69·2)   |
| Saint Lucia                      | 40 to 64      | 21·6<br>(19·3-24·4)   | 10·2<br>(7·89-12·7)     | 31·8<br>(27·8-35·9)   |
| Saint Lucia                      | 65 plus       | 3·08<br>(2·26-4·09)   | 0·719<br>(0·383-1·27)   | 3·80<br>(2·68-5·26)   |
| Saint Lucia                      | 15 to 95 plus | 64·5<br>(60·3-68·7)   | 35·5<br>(31·3-39·7)     | 100<br>(100-100)      |
| Saint Vincent and the Grenadines | 15 to 39      | 46·2<br>(39·2-53·3)   | 21·9<br>(15·8-27·4)     | 68·0<br>(61·5-74·1)   |
| Saint Vincent and the Grenadines | 40 to 64      | 22·3<br>(19·1-25·4)   | 6·00<br>(3·60-8·58)     | 28·3<br>(23·4-33·1)   |
| Saint Vincent and the Grenadines | 65 plus       | 3·34<br>(2·24-4·69)   | 0·361<br>(0·111-0·836)  | 3·70<br>(2·38-5·49)   |
| Saint Vincent and the Grenadines | 15 to 95 plus | 71·8<br>(65·6-78·7)   | 28·2<br>(21·3-34·4)     | 100<br>(100-100)      |
| Suriname                         | 15 to 39      | 53·0<br>(45·2-60·6)   | 20·9<br>(14·3-27·2)     | 73·8<br>(67·3-79·6)   |
| Suriname                         | 40 to 64      | 19·8<br>(16·3-23·7)   | 4·18<br>(2·24-6·27)     | 24·0<br>(19·0-29·5)   |
| Suriname                         | 65 plus       | 1·94<br>(1·13-3·08)   | 0·196<br>(0·0532-0·498) | 2·14<br>(1·19-3·50)   |
| Suriname                         | 15 to 95 plus | 74·7<br>(67·8-81·9)   | 25·3<br>(18·1-32·2)     | 100<br>(100-100)      |
| Trinidad and Tobago              | 15 to 39      | 47·3<br>(40·1-54·4)   | 19·8<br>(13·8-25·4)     | 67·1<br>(60·7-73·3)   |
| Trinidad and Tobago              | 40 to 64      | 23·1<br>(19·8-26·8)   | 5·73<br>(3·46-8·15)     | 28·8<br>(23·9-33·9)   |
| Trinidad and Tobago              | 65 plus       | 3·64<br>(2·44-5·09)   | 0·463<br>(0·153-1·10)   | 4·10<br>(2·63-6·22)   |
| Trinidad and Tobago              | 15 to 95 plus | 74·0<br>(67·6-80·6)   | 26·0<br>(19·4-32·4)     | 100<br>(100-100)      |
| United States Virgin Islands     | 15 to 39      | 44·2<br>(29·7-82·0)   | 19·2<br>(8·72-26·9)     | 63·3<br>(48·2-98·3)   |
| United States Virgin Islands     | 40 to 64      | 21·8<br>(1·65-26·8)   | 7·75<br>(0·0118-13·8)   | 29·6<br>(1·69-39·2)   |
| United States Virgin Islands     | 65 plus       | 5·33<br>(0·0207-8·76) | 1·79<br>(0-4·43)        | 7·13<br>(0·0207-13·3) |
| United States Virgin Islands     | 15 to 95 plus | 71·3<br>(62·4-90·8)   | 28·7<br>(9·17-37·6)     | 100<br>(100-100)      |
| Central Latin America            | 15 to 39      | 51·4<br>(45·6-56·6)   | 20·0<br>(14·6-24·0)     | 71·4<br>(66·6-75·1)   |
| Central Latin America            | 40 to 64      | 22·3<br>(20·2-25·3)   | 3·54<br>(2·24-4·97)     | 25·8<br>(22·8-29·9)   |
| Central Latin America            | 65 plus       | 2·55<br>(1·85-3·44)   | 0·199<br>(0·0789-0·412) | 2·75<br>(1·95-3·77)   |
| Central Latin America            | 15 to 95 plus | 76·2<br>(71·6-81·9)   | 23·8<br>(18·1-28·4)     | 100<br>(100-100)      |
| Colombia                         | 15 to 39      | 51·4<br>(44·5-57·8)   | 22·4<br>(16·6-27·0)     | 73·8<br>(68·3-78·0)   |
| Colombia                         | 40 to 64      | 20·1<br>(17·6-23·4)   | 3·86<br>(2·29-5·71)     | 24·0<br>(20·3-28·5)   |
| Colombia                         | 65 plus       | 2·01<br>(1·26-3·08)   | 0·175<br>(0·0477-0·435) | 2·18<br>(1·34-3·52)   |
| Colombia                         | 15 to 95 plus | 73·6<br>(68·2-79·8)   | 26·4<br>(20·2-31·8)     | 100<br>(100-100)      |
| Costa Rica                       | 15 to 39      | 49·1<br>(40·8-56·6)   | 21·9<br>(14·7-28·1)     | 71·0<br>(63·9-76·3)   |

|                                    |               |                      |                         |                      |
|------------------------------------|---------------|----------------------|-------------------------|----------------------|
| Costa Rica                         | 40 to 64      | 21·8<br>(18·8–26·0)  | 3·99<br>(2·12–6·38)     | 25·8<br>(21·4–31·2)  |
| Costa Rica                         | 65 plus       | 2·90<br>(1·83–4·48)  | 0·257<br>(0·0650–0·667) | 3·16<br>(1·92–5·07)  |
| Costa Rica                         | 15 to 95 plus | 73·9<br>(66·7–81·6)  | 26·1<br>(18·4–33·3)     | 100<br>(100–100)     |
| El Salvador                        | 15 to 39      | 64·1<br>(57·1–69·7)  | 10·3<br>(6·34–14·2)     | 74·3<br>(68·3–78·7)  |
| El Salvador                        | 40 to 64      | 21·2<br>(18·1–25·6)  | 1·79<br>(0·949–2·91)    | 23·0<br>(19·3–28·0)  |
| El Salvador                        | 65 plus       | 2·54<br>(1·60–3·79)  | 0·103<br>(0·0274–0·265) | 2·65<br>(1·64–4·06)  |
| El Salvador                        | 15 to 95 plus | 87·8<br>(83·6–92·0)  | 12·2<br>(8·02–16·4)     | 100<br>(100–100)     |
| Guatemala                          | 15 to 39      | 64·1<br>(56·3–71·0)  | 14·7<br>(9·37–19·7)     | 78·8<br>(72·8–83·1)  |
| Guatemala                          | 40 to 64      | 17·5<br>(14·4–21·6)  | 1·93<br>(0·879–3·40)    | 19·5<br>(15·7–24·6)  |
| Guatemala                          | 65 plus       | 1·65<br>(0·923–2·73) | 0·106<br>(0·0187–0·306) | 1·76<br>(0·947–3·00) |
| Guatemala                          | 15 to 95 plus | 83·3<br>(77·4–88·9)  | 16·7<br>(11·1–22·6)     | 100<br>(100–100)     |
| Honduras                           | 15 to 39      | 63·0<br>(57·1–68·0)  | 11·8<br>(8·04–15·8)     | 74·8<br>(70·2–78·8)  |
| Honduras                           | 40 to 64      | 20·7<br>(17·7–24·2)  | 2·12<br>(1·25–3·21)     | 22·8<br>(19·4–26·9)  |
| Honduras                           | 65 plus       | 2·23<br>(1·52–3·11)  | 0·152<br>(0·0533–0·311) | 2·38<br>(1·59–3·40)  |
| Honduras                           | 15 to 95 plus | 85·9<br>(81·4–89·7)  | 14·1<br>(10·3–18·6)     | 100<br>(100–100)     |
| Mexico                             | 15 to 39      | 48·8<br>(43·3–54·1)  | 21·1<br>(15·6–25·5)     | 69·9<br>(65·3–73·5)  |
| Mexico                             | 40 to 64      | 23·3<br>(21·0–26·4)  | 3·78<br>(2·34–5·51)     | 27·1<br>(23·9–31·0)  |
| Mexico                             | 65 plus       | 2·82<br>(2·11–3·74)  | 0·224<br>(0·0867–0·443) | 3·04<br>(2·22–4·13)  |
| Mexico                             | 15 to 95 plus | 74·9<br>(69·9–80·9)  | 25·1<br>(19·1–30·1)     | 100<br>(100–100)     |
| Nicaragua                          | 15 to 39      | 58·1<br>(51·0–64·3)  | 18·6<br>(12·4–23·8)     | 76·7<br>(71·3–80·4)  |
| Nicaragua                          | 40 to 64      | 18·8<br>(16·3–22·3)  | 2·64<br>(1·45–4·15)     | 21·4<br>(18·2–26·2)  |
| Nicaragua                          | 65 plus       | 1·75<br>(1·13–2·52)  | 0·114<br>(0·0325–0·271) | 1·86<br>(1·18–2·79)  |
| Nicaragua                          | 15 to 95 plus | 78·7<br>(72·6–85·0)  | 21·3<br>(15·0–27·4)     | 100<br>(100–100)     |
| Panama                             | 15 to 39      | 50·6<br>(44·9–55·6)  | 16·4<br>(11·8–20·9)     | 67·0<br>(62·6–71·0)  |
| Panama                             | 40 to 64      | 25·3<br>(22·6–28·4)  | 3·78<br>(2·34–5·43)     | 29·1<br>(25·8–32·9)  |
| Panama                             | 65 plus       | 3·58<br>(2·70–4·84)  | 0·273<br>(0·102–0·570)  | 3·85<br>(2·82–5·35)  |
| Panama                             | 15 to 95 plus | 79·5<br>(74·6–84·7)  | 20·5<br>(15·3–25·4)     | 100<br>(100–100)     |
| Venezuela (Bolivarian Republic of) | 15 to 39      | 54·2<br>(47·0–60·4)  | 16·8<br>(11·3–21·8)     | 70·9<br>(65·5–75·6)  |
| Venezuela (Bolivarian Republic of) | 40 to 64      | 23·4<br>(20·4–27·3)  | 3·06<br>(1·61–4·81)     | 26·5<br>(22·3–31·0)  |
| Venezuela (Bolivarian Republic of) | 65 plus       | 2·45<br>(1·61–3·41)  | 0·169<br>(0·0476–0·397) | 2·62<br>(1·69–3·78)  |
| Venezuela (Bolivarian Republic of) | 15 to 95 plus | 80·0<br>(74·2–85·9)  | 20·0<br>(14·1–25·8)     | 100<br>(100–100)     |

|                              |               |                           |                            |                           |
|------------------------------|---------------|---------------------------|----------------------------|---------------------------|
| Tropical Latin America       | 15 to 39      | 43.2<br>(38.3-47.6)       | 25.2<br>(20.9-27.9)        | 68.4<br>(63.0-72.4)       |
| Tropical Latin America       | 40 to 64      | 21.5<br>(19.5-24.4)       | 6.70<br>(4.94-8.69)        | 28.2<br>(24.9-32.8)       |
| Tropical Latin America       | 65 plus       | 2.82<br>(2.11-3.65)       | 0.587<br>(0.306-0.979)     | 3.41<br>(2.43-4.56)       |
| Tropical Latin America       | 15 to 95 plus | 67.5<br>(64.3-71.6)       | 32.5<br>(28.4-35.7)        | 100<br>(100-100)          |
| Brazil                       | 15 to 39      | 42.9<br>(38.0-47.4)       | 25.1<br>(20.9-27.9)        | 68.1<br>(62.6-72.1)       |
| Brazil                       | 40 to 64      | 21.7<br>(19.7-24.6)       | 6.79<br>(5.03-8.81)        | 28.5<br>(25.2-33.1)       |
| Brazil                       | 65 plus       | 2.86<br>(2.12-3.70)       | 0.593<br>(0.310-0.991)     | 3.45<br>(2.45-4.61)       |
| Brazil                       | 15 to 95 plus | 67.5<br>(64.2-71.4)       | 32.5<br>(28.6-35.8)        | 100<br>(100-100)          |
| Paraguay                     | 15 to 39      | 48.8<br>(43.3-54.6)       | 26.6<br>(19.8-30.2)        | 75.4<br>(69.9-79.4)       |
| Paraguay                     | 40 to 64      | 17.2<br>(15.4-20.4)       | 4.79<br>(3.24-6.48)        | 22.0<br>(18.8-26.2)       |
| Paraguay                     | 65 plus       | 2.14<br>(1.48-2.92)       | 0.440<br>(0.186-0.814)     | 2.58<br>(1.69-3.75)       |
| Paraguay                     | 15 to 95 plus | 68.2<br>(64.0-75.0)       | 31.8<br>(25.0-36.0)        | 100<br>(100-100)          |
| North Africa and Middle East | 15 to 39      | 66.0<br>(58.3-73.1)       | 6.07<br>(4.53-8.56)        | 72.1<br>(65.0-78.7)       |
| North Africa and Middle East | 40 to 64      | 23.6<br>(18.1-29.0)       | 1.99<br>(1.06-3.14)        | 25.6<br>(19.5-31.7)       |
| North Africa and Middle East | 65 plus       | 2.16<br>(1.57-3.09)       | 0.151<br>(0.0701-0.336)    | 2.31<br>(1.65-3.38)       |
| North Africa and Middle East | 15 to 95 plus | 91.8<br>(88.7-94.0)       | 8.21<br>(6.02-11.3)        | 100<br>(100-100)          |
| Afghanistan                  | 15 to 39      | 91.0<br>(80.2-97.6)       | 3.79<br>(1.18-9.41)        | 94.8<br>(87.0-99.3)       |
| Afghanistan                  | 40 to 64      | 4.97<br>(0.685-12.2)      | 0.198<br>(0.00731-0.718)   | 5.16<br>(0.696-12.6)      |
| Afghanistan                  | 65 plus       | 0.0732<br>(0.00208-0.365) | 0.00318<br>(0-0.0227)      | 0.0764<br>(0.00215-0.388) |
| Afghanistan                  | 15 to 95 plus | 96.0<br>(90.2-98.8)       | 3.99<br>(1.21-9.84)        | 100<br>(100-100)          |
| Algeria                      | 15 to 39      | 65.9<br>(57.7-73.0)       | 4.47<br>(3.06-6.48)        | 70.3<br>(63.0-77.1)       |
| Algeria                      | 40 to 64      | 25.4<br>(19.6-31.6)       | 1.56<br>(0.754-2.65)       | 27.0<br>(20.7-33.7)       |
| Algeria                      | 65 plus       | 2.55<br>(1.73-3.62)       | 0.134<br>(0.0490-0.298)    | 2.68<br>(1.80-3.85)       |
| Algeria                      | 15 to 95 plus | 93.8<br>(91.3-95.8)       | 6.17<br>(4.18-8.70)        | 100<br>(100-100)          |
| Bahrain                      | 15 to 39      | 68.1<br>(60.6-74.9)       | 2.23<br>(1.44-3.32)        | 70.3<br>(63.3-76.9)       |
| Bahrain                      | 40 to 64      | 27.9<br>(21.6-34.5)       | 0.741<br>(0.345-1.28)      | 28.6<br>(22.0-35.5)       |
| Bahrain                      | 65 plus       | 1.04<br>(0.693-1.55)      | 0.0372<br>(0.00815-0.0901) | 1.07<br>(0.712-1.64)      |
| Bahrain                      | 15 to 95 plus | 97.0<br>(95.6-98.0)       | 3.01<br>(1.97-4.40)        | 100<br>(100-100)          |
| Egypt                        | 15 to 39      | 69.6<br>(60.5-78.1)       | 5.16<br>(3.51-7.49)        | 74.7<br>(66.2-82.7)       |
| Egypt                        | 40 to 64      | 22.2<br>(15.4-29.4)       | 1.39<br>(0.627-2.45)       | 23.6<br>(16.2-31.6)       |
| Egypt                        | 65 plus       | 1.58<br>(0.872-2.58)      | 0.0750<br>(0.0213-0.187)   | 1.65<br>(0.900-2.75)      |

|                            |               |                        |                            |                        |
|----------------------------|---------------|------------------------|----------------------------|------------------------|
| Egypt                      | 15 to 95 plus | 93.4<br>(90.6–95.4)    | 6.63<br>(4.55–9.39)        | 100<br>(100–100)       |
| Iran (Islamic Republic of) | 15 to 39      | 64.9<br>(57.1–73.2)    | 4.25<br>(2.80–6.14)        | 69.2<br>(61.9–76.8)    |
| Iran (Islamic Republic of) | 40 to 64      | 26.7<br>(20.2–32.8)    | 1.62<br>(0.656–2.86)       | 28.3<br>(21.2–34.9)    |
| Iran (Islamic Republic of) | 65 plus       | 2.36<br>(1.50–3.42)    | 0.138<br>(0.0382–0.326)    | 2.50<br>(1.55–3.71)    |
| Iran (Islamic Republic of) | 15 to 95 plus | 94.0<br>(91.5–96.2)    | 6.01<br>(3.81–8.47)        | 100<br>(100–100)       |
| Iraq                       | 15 to 39      | 48.1<br>(40.9–55.0)    | 21.3<br>(16.3–27.2)        | 69.3<br>(64.0–74.8)    |
| Iraq                       | 40 to 64      | 17.7<br>(14.4–21.3)    | 9.97<br>(6.77–13.6)        | 27.7<br>(22.6–32.7)    |
| Iraq                       | 65 plus       | 1.86<br>(1.39–2.44)    | 1.11<br>(0.664–1.75)       | 2.97<br>(2.21–3.92)    |
| Iraq                       | 15 to 95 plus | 67.6<br>(61.3–73.6)    | 32.4<br>(26.4–38.7)        | 100<br>(100–100)       |
| Jordan                     | 15 to 39      | 65.7<br>(58.0–74.4)    | 3.42<br>(2.31–4.80)        | 69.1<br>(61.6–77.4)    |
| Jordan                     | 40 to 64      | 26.6<br>(19.7–32.9)    | 1.43<br>(0.702–2.35)       | 28.0<br>(20.4–34.6)    |
| Jordan                     | 65 plus       | 2.80<br>(1.76–4.15)    | 0.0816<br>(0.0259–0.168)   | 2.88<br>(1.80–4.30)    |
| Jordan                     | 15 to 95 plus | 95.1<br>(93.2–96.7)    | 4.93<br>(3.35–6.76)        | 100<br>(100–100)       |
| Kuwait                     | 15 to 39      | 82.3<br>(64.6–99.3)    | 2.37<br>(0.195–4.78)       | 84.7<br>(68.0–99.7)    |
| Kuwait                     | 40 to 64      | 14.7<br>(0.293–30.2)   | 0.389<br>(0–1.22)          | 15.0<br>(0.293–31.2)   |
| Kuwait                     | 65 plus       | 0.245<br>(0–1.02)      | 0.00492<br>(0–0.0301)      | 0.250<br>(0–1.04)      |
| Kuwait                     | 15 to 95 plus | 97.2<br>(94.4–99.8)    | 2.76<br>(0.195–5.57)       | 100<br>(100–100)       |
| Lebanon                    | 15 to 39      | 66.6<br>(54.1–77.3)    | 10.1<br>(5.60–18.1)        | 76.6<br>(66.4–85.4)    |
| Lebanon                    | 40 to 64      | 18.2<br>(11.9–24.9)    | 1.78<br>(0.378–4.04)       | 20.0<br>(12.6–28.0)    |
| Lebanon                    | 65 plus       | 3.24<br>(1.75–5.60)    | 0.0858<br>(0.00724–0.384)  | 3.33<br>(1.76–5.90)    |
| Lebanon                    | 15 to 95 plus | 88.1<br>(79.6–93.6)    | 11.9<br>(6.41–20.4)        | 100<br>(100–100)       |
| Libya                      | 15 to 39      | 69.4<br>(60.5–78.4)    | 2.24<br>(1.38–3.51)        | 71.6<br>(63.0–80.2)    |
| Libya                      | 40 to 64      | 26.2<br>(18.3–34.2)    | 0.463<br>(0.181–0.816)     | 26.7<br>(18.6–34.9)    |
| Libya                      | 65 plus       | 1.68<br>(0.901–2.66)   | 0.0271<br>(0.00421–0.0699) | 1.71<br>(0.907–2.73)   |
| Libya                      | 15 to 95 plus | 97.3<br>(95.9–98.3)    | 2.73<br>(1.68–4.11)        | 100<br>(100–100)       |
| Morocco                    | 15 to 39      | 80.3<br>(73.7–86.3)    | 0.595<br>(0.139–1.83)      | 80.9<br>(74.5–86.6)    |
| Morocco                    | 40 to 64      | 18.5<br>(13.0–24.7)    | 0.0495<br>(0.00206–0.187)  | 18.5<br>(13.0–24.8)    |
| Morocco                    | 65 plus       | 0.537<br>(0.302–0.889) | 0.00137<br>(0–0.00905)     | 0.539<br>(0.302–0.897) |
| Morocco                    | 15 to 95 plus | 99.4<br>(98.1–99.8)    | 0.646<br>(0.152–1.89)      | 100<br>(100–100)       |
| Oman                       | 15 to 39      | 79.7<br>(69.9–89.1)    | 2.20<br>(1.13–3.90)        | 81.9<br>(72.7–90.6)    |
| Oman                       | 40 to 64      | 17.3<br>(9.19–25.7)    | 0.341<br>(0.0623–0.787)    | 17.7<br>(9.25–26.5)    |

|                      |               |                         |                              |                         |
|----------------------|---------------|-------------------------|------------------------------|-------------------------|
| Oman                 | 65 plus       | 0.386<br>(0.142–0.861)  | 0.00871<br>(0–0.0381)        | 0.395<br>(0.143–0.899)  |
| Oman                 | 15 to 95 plus | 97.4<br>(95.5–98.8)     | 2.55<br>(1.25–4.47)          | 100<br>(100–100)        |
| Palestine            | 15 to 39      | 70.4<br>(64.2–76.8)     | 4.88<br>(3.16–6.93)          | 75.2<br>(69.6–81.0)     |
| Palestine            | 40 to 64      | 21.6<br>(16.7–26.4)     | 1.39<br>(0.740–2.26)         | 23.0<br>(17.6–28.3)     |
| Palestine            | 65 plus       | 1.67<br>(1.14–2.31)     | 0.118<br>(0.0445–0.232)      | 1.79<br>(1.21–2.51)     |
| Palestine            | 15 to 95 plus | 93.6<br>(91.2–95.7)     | 6.39<br>(4.29–8.76)          | 100<br>(100–100)        |
| Qatar                | 15 to 39      | 82.3<br>(75.4–88.7)     | 1.06<br>(0.581–1.84)         | 83.3<br>(76.9–89.6)     |
| Qatar                | 40 to 64      | 16.1<br>(10.1–22.3)     | 0.233<br>(0.0636–0.508)      | 16.3<br>(10.2–22.7)     |
| Qatar                | 65 plus       | 0.314<br>(0.144–0.570)  | 0.00319<br>(0–0.0122)        | 0.317<br>(0.144–0.582)  |
| Qatar                | 15 to 95 plus | 98.7<br>(97.8–99.3)     | 1.30<br>(0.709–2.23)         | 100<br>(100–100)        |
| Saudi Arabia         | 15 to 39      | 81.4<br>(68.2–96.8)     | 2.27<br>(0.571–4.47)         | 83.7<br>(71.4–97.6)     |
| Saudi Arabia         | 40 to 64      | 15.7<br>(2.36–27.0)     | 0.225<br>(0.00353–0.636)     | 15.9<br>(2.36–27.5)     |
| Saudi Arabia         | 65 plus       | 0.411<br>(0.00656–1.15) | 0.00465<br>(0–0.0207)        | 0.416<br>(0.00656–1.17) |
| Saudi Arabia         | 15 to 95 plus | 97.5<br>(95.2–99.4)     | 2.50<br>(0.603–4.80)         | 100<br>(100–100)        |
| Sudan                | 15 to 39      | 94.4<br>(0–100)         | 0.826<br>(0–7.84)            | 95.2<br>(0–100)         |
| Sudan                | 40 to 64      | 0.149<br>(0–0.828)      | 0.00442<br>(0–0.0173)        | 0.153<br>(0–0.855)      |
| Sudan                | 65 plus       | 0.00411<br>(0–0)        | 0.000220<br>(0–0)            | 0.00433<br>(0–0)        |
| Sudan                | 15 to 95 plus | 94.6<br>(0–100)         | 0.831<br>(0–7.90)            | 95.4<br>(0–100)         |
| Syrian Arab Republic | 15 to 39      | 70.1<br>(59.1–81.1)     | 7.11<br>(4.18–11.2)          | 77.2<br>(67.5–86.7)     |
| Syrian Arab Republic | 40 to 64      | 20.0<br>(12.0–28.1)     | 1.37<br>(0.312–2.90)         | 21.4<br>(12.6–30.1)     |
| Syrian Arab Republic | 65 plus       | 1.39<br>(0.528–2.56)    | 0.0642<br>(0.00447–0.220)    | 1.45<br>(0.536–2.77)    |
| Syrian Arab Republic | 15 to 95 plus | 91.5<br>(86.9–95.1)     | 8.54<br>(4.86–13.1)          | 100<br>(100–100)        |
| Tunisia              | 15 to 39      | 66.7<br>(60.8–72.6)     | 0.600<br>(0.267–1.22)        | 67.3<br>(61.4–73.2)     |
| Tunisia              | 40 to 64      | 29.1<br>(23.7–34.2)     | 0.123<br>(0.0217–0.336)      | 29.2<br>(23.8–34.4)     |
| Tunisia              | 65 plus       | 3.48<br>(2.54–4.62)     | 0.00831<br>(0.000428–0.0403) | 3.49<br>(2.55–4.64)     |
| Tunisia              | 15 to 95 plus | 99.3<br>(98.5–99.7)     | 0.732<br>(0.298–1.50)        | 100<br>(100–100)        |
| Turkey               | 15 to 39      | 60.3<br>(50.9–69.4)     | 8.73<br>(6.16–12.3)          | 69.1<br>(60.2–77.7)     |
| Turkey               | 40 to 64      | 24.8<br>(18.4–31.2)     | 3.10<br>(1.52–5.11)          | 27.9<br>(19.9–35.4)     |
| Turkey               | 65 plus       | 2.78<br>(1.82–4.22)     | 0.232<br>(0.0851–0.542)      | 3.01<br>(1.94–4.72)     |
| Turkey               | 15 to 95 plus | 87.9<br>(83.5–91.7)     | 12.1<br>(8.29–16.5)          | 100<br>(100–100)        |
| United Arab Emirates | 15 to 39      | 49.2<br>(35.2–65.3)     | 3.33<br>(1.38–6.82)          | 52.5<br>(39.2–68.1)     |

|                      |               |                |                 |                |
|----------------------|---------------|----------------|-----------------|----------------|
|                      |               | 45.7           | 0.815           | 46.5           |
| United Arab Emirates | 40 to 64      | (31.0-57.9)    | (0.0826-2.36)   | (31.2-59.4)    |
|                      |               | 0.962          | 0.00750         | 0.969          |
| United Arab Emirates | 65 plus       | (0.442-1.90)   | (0-0.0536)      | (0.443-1.93)   |
|                      |               | 95.9           | 4.15            | 100            |
| United Arab Emirates | 15 to 95 plus | (91.3-98.4)    | (1.62-8.68)     | (100-100)      |
|                      |               | 80.9           | 4.89            | 85.8           |
| Yemen                | 15 to 39      | (71.9-88.5)    | (2.78-8.10)     | (78.4-92.4)    |
|                      |               | 12.9           | 0.671           | 13.6           |
| Yemen                | 40 to 64      | (7.04-19.1)    | (0.189-1.50)    | (7.32-20.4)    |
|                      |               | 0.612          | 0.0277          | 0.640          |
| Yemen                | 65 plus       | (0.253-1.31)   | (0.00353-0.109) | (0.260-1.42)   |
|                      |               | 94.4           | 5.59            | 100            |
| Yemen                | 15 to 95 plus | (90.8-96.9)    | (3.12-9.21)     | (100-100)      |
|                      |               | 61.7           | 4.79            | 66.4           |
| South Asia           | 15 to 39      | (55.6-69.9)    | (3.06-6.51)     | (60.5-74.6)    |
|                      |               | 27.5           | 2.22            | 29.7           |
| South Asia           | 40 to 64      | (21.5-32.0)    | (1.18-3.21)     | (22.9-34.7)    |
|                      |               | 3.62           | 0.240           | 3.86           |
| South Asia           | 65 plus       | (2.29-4.98)    | (0.101-0.432)   | (2.40-5.33)    |
|                      |               | 92.8           | 7.25            | 100            |
| South Asia           | 15 to 95 plus | (90.6-95.2)    | (4.83-9.35)     | (100-100)      |
|                      |               | 74.0           | 7.09            | 81.1           |
| Bangladesh           | 15 to 39      | (63.0-92.8)    | (0.953-12.1)    | (70.4-99.0)    |
|                      |               | 16.3           | 1.15            | 17.4           |
| Bangladesh           | 40 to 64      | (1.00-24.9)    | (0.00318-2.30)  | (1.00-27.0)    |
|                      |               | 1.38           | 0.0667          | 1.44           |
| Bangladesh           | 65 plus       | (0.00236-2.80) | (0-0.179)       | (0.00236-2.93) |
|                      |               | 91.7           | 8.30            | 100            |
| Bangladesh           | 15 to 95 plus | (87.0-98.7)    | (1.26-13.0)     | (100-100)      |
|                      |               | 63.3           | 24.3            | 87.6           |
| Bhutan               | 15 to 39      | (50.3-83.3)    | (8.44-34.6)     | (77.1-98.2)    |
|                      |               | 8.95           | 2.96            | 11.9           |
| Bhutan               | 40 to 64      | (1.42-15.6)    | (0.229-6.17)    | (1.78-21.2)    |
|                      |               | 0.384          | 0.111           | 0.496          |
| Bhutan               | 65 plus       | (0.0111-1.23)  | (0-0.465)       | (0.0153-1.71)  |
|                      |               | 72.6           | 27.4            | 100            |
| Bhutan               | 15 to 95 plus | (62.8-89.7)    | (10.3-37.2)     | (100-100)      |
|                      |               | 60.4           | 4.04            | 64.4           |
| India                | 15 to 39      | (54.3-68.5)    | (2.65-5.65)     | (58.5-72.5)    |
|                      |               | 29.1           | 2.20            | 31.3           |
| India                | 40 to 64      | (23.2-33.9)    | (1.20-3.20)     | (24.5-36.3)    |
|                      |               | 3.98           | 0.258           | 4.23           |
| India                | 65 plus       | (2.55-5.44)    | (0.108-0.470)   | (2.67-5.85)    |
|                      |               | 93.5           | 6.50            | 100            |
| India                | 15 to 95 plus | (91.5-95.5)    | (4.47-8.49)     | (100-100)      |
|                      |               | 57.7           | 16.3            | 74.0           |
| Nepal                | 15 to 39      | (48.3-73.8)    | (9.57-21.3)     | (65.4-86.8)    |
|                      |               | 18.4           | 5.45            | 23.8           |
| Nepal                | 40 to 64      | (10.3-23.7)    | (1.90-8.31)     | (12.4-31.2)    |
|                      |               | 1.88           | 0.333           | 2.21           |
| Nepal                | 65 plus       | (0.506-3.28)   | (0.0399-0.736)  | (0.541-3.88)   |
|                      |               | 78.0           | 22.0            | 100            |
| Nepal                | 15 to 95 plus | (72.6-86.7)    | (13.3-27.4)     | (100-100)      |
|                      |               | 75.1           | 9.16            | 84.2           |
| Pakistan             | 15 to 39      | (64.7-88.1)    | (4.14-13.9)     | (74.6-95.3)    |
|                      |               | 13.5           | 1.68            | 15.2           |
| Pakistan             | 40 to 64      | (4.14-21.2)    | (0.336-3.21)    | (4.63-24.3)    |
|                      |               | 0.525          | 0.0492          | 0.574          |
| Pakistan             | 65 plus       | (0.0794-1.31)  | (0.00465-0.147) | (0.0849-1.43)  |
|                      |               | 89.1           | 10.9            | 100            |
| Pakistan             | 15 to 95 plus | (84.2-94.6)    | (5.42-15.8)     | (100-100)      |



|                                       |               |                       |                            |                       |
|---------------------------------------|---------------|-----------------------|----------------------------|-----------------------|
| East Asia                             | 15 to 39      | 42.8<br>(38.8–46.8)   | 4.26<br>(2.94–6.35)        | 47.1<br>(42.7–51.3)   |
| East Asia                             | 40 to 64      | 41.1<br>(37.9–44.7)   | 3.60<br>(2.63–4.88)        | 44.7<br>(41.4–48.6)   |
| East Asia                             | 65 plus       | 7.60<br>(6.13–9.08)   | 0.584<br>(0.292–0.997)     | 8.19<br>(6.47–9.85)   |
| East Asia                             | 15 to 95 plus | 91.6<br>(88.9–93.5)   | 8.45<br>(6.51–11.1)        | 100<br>(100–100)      |
| China                                 | 15 to 39      | 42.7<br>(38.6–46.6)   | 4.23<br>(2.90–6.32)        | 46.9<br>(42.4–51.1)   |
| China                                 | 40 to 64      | 41.3<br>(38.0–44.8)   | 3.60<br>(2.62–4.89)        | 44.8<br>(41.5–48.7)   |
| China                                 | 65 plus       | 7.67<br>(6.18–9.16)   | 0.590<br>(0.294–1.01)      | 8.27<br>(6.54–9.95)   |
| China                                 | 15 to 95 plus | 91.6<br>(89.0–93.6)   | 8.41<br>(6.44–11.0)        | 100<br>(100–100)      |
| Democratic People's Republic of Korea | 15 to 39      | 52.5<br>(46.9–58.0)   | 5.07<br>(3.11–8.00)        | 57.6<br>(51.2–63.3)   |
| Democratic People's Republic of Korea | 40 to 64      | 35.3<br>(31.0–40.2)   | 3.05<br>(1.95–4.37)        | 38.3<br>(33.3–43.7)   |
| Democratic People's Republic of Korea | 65 plus       | 3.73<br>(2.64–4.94)   | 0.324<br>(0.116–0.653)     | 4.05<br>(2.78–5.41)   |
| Democratic People's Republic of Korea | 15 to 95 plus | 91.6<br>(87.8–94.1)   | 8.44<br>(5.90–12.2)        | 100<br>(100–100)      |
| Taiwan (Province of China)            | 15 to 39      | 45.5<br>(40.5–50.3)   | 5.98<br>(3.92–9.11)        | 51.4<br>(45.5–56.5)   |
| Taiwan (Province of China)            | 40 to 64      | 37.2<br>(33.6–41.6)   | 4.51<br>(3.06–6.30)        | 41.7<br>(37.8–46.4)   |
| Taiwan (Province of China)            | 65 plus       | 6.43<br>(4.74–8.19)   | 0.446<br>(0.172–0.831)     | 6.87<br>(4.93–8.90)   |
| Taiwan (Province of China)            | 15 to 95 plus | 89.1<br>(85.3–91.9)   | 10.9<br>(8.11–14.7)        | 100<br>(100–100)      |
| Oceania                               | 15 to 39      | 74.7<br>(66.2–87.3)   | 12.0<br>(2.68–17.6)        | 86.7<br>(80.0–94.0)   |
| Oceania                               | 40 to 64      | 11.3<br>(5.25–16.6)   | 1.07<br>(0.278–2.00)       | 12.4<br>(5.60–18.4)   |
| Oceania                               | 65 plus       | 0.856<br>(0.362–1.53) | 0.0372<br>(0.00904–0.0937) | 0.893<br>(0.370–1.60) |
| Oceania                               | 15 to 95 plus | 86.9<br>(81.2–96.7)   | 13.1<br>(3.33–18.8)        | 100<br>(100–100)      |
| American Samoa                        | 15 to 39      | 79.8<br>(62.6–99.5)   | 16.8<br>(0.144–32.2)       | 96.6<br>(87.2–100)    |
| American Samoa                        | 40 to 64      | 3.09<br>(0–11.5)      | 0.212<br>(0–1.05)          | 3.30<br>(0–12.2)      |
| American Samoa                        | 65 plus       | 0.147<br>(0–0.870)    | 0.00246<br>(0–0.0324)      | 0.150<br>(0–0.894)    |
| American Samoa                        | 15 to 95 plus | 83.0<br>(67.5–99.9)   | 17.0<br>(0.145–32.5)       | 100<br>(100–100)      |
| Cook Islands                          | 15 to 39      | 37.9<br>(32.9–46.0)   | 21.8<br>(13.2–26.5)        | 59.7<br>(53.4–67.2)   |
| Cook Islands                          | 40 to 64      | 25.3<br>(21.7–28.7)   | 8.00<br>(5.17–10.7)        | 33.3<br>(27.4–38.0)   |
| Cook Islands                          | 65 plus       | 6.04<br>(4.60–7.46)   | 0.969<br>(0.466–1.62)      | 7.01<br>(5.26–8.83)   |
| Cook Islands                          | 15 to 95 plus | 69.2<br>(64.4–78.8)   | 30.8<br>(21.2–35.6)        | 100<br>(100–100)      |
| Fiji                                  | 15 to 39      | 70.9<br>(61.8–83.4)   | 10.7<br>(3.42–15.4)        | 81.6<br>(73.8–90.5)   |
| Fiji                                  | 40 to 64      | 15.6<br>(8.39–21.9)   | 1.42<br>(0.398–2.67)       | 17.0<br>(8.74–24.1)   |
| Fiji                                  | 65 plus       | 1.36<br>(0.589–2.40)  | 0.0526<br>(0.00703–0.142)  | 1.42<br>(0.601–2.54)  |

|                                  |               |                       |                        |                       |
|----------------------------------|---------------|-----------------------|------------------------|-----------------------|
| Fiji                             | 15 to 95 plus | 87·8<br>(82·8–95·9)   | 12·2<br>(4·11–17·2)    | 100<br>(100–100)      |
| Guam                             | 15 to 39      | 62·4<br>(47·0–87·4)   | 18·4<br>(2·55–28·2)    | 80·8<br>(66·8–97·1)   |
| Guam                             | 40 to 64      | 15·5<br>(2·65–24·6)   | 1·65<br>(0·0125–4·75)  | 17·1<br>(2·72–28·6)   |
| Guam                             | 65 plus       | 2·03<br>(0·157–4·12)  | 0·0671<br>(0–0·315)    | 2·09<br>(0·157–4·43)  |
| Guam                             | 15 to 95 plus | 79·9<br>(70·3–96·8)   | 20·1<br>(3·23–29·7)    | 100<br>(100–100)      |
| Kiribati                         | 15 to 39      | 79·6<br>(66·6–96·7)   | 14·1<br>(1·68–23·0)    | 93·7<br>(83·5–99·9)   |
| Kiribati                         | 40 to 64      | 5·21<br>(0·0591–13·4) | 0·819<br>(0–2·56)      | 6·03<br>(0·0721–15·5) |
| Kiribati                         | 65 plus       | 0·216<br>(0–0·788)    | 0·0268<br>(0–0·153)    | 0·243<br>(0–0·881)    |
| Kiribati                         | 15 to 95 plus | 85·1<br>(76·1–98·1)   | 14·9<br>(1·93–23·9)    | 100<br>(100–100)      |
| Marshall Islands                 | 15 to 39      | 75·8<br>(67·2–87·9)   | 8·83<br>(1·83–13·4)    | 84·7<br>(77·2–93·2)   |
| Marshall Islands                 | 40 to 64      | 13·4<br>(6·15–19·4)   | 0·828<br>(0·144–1·76)  | 14·2<br>(6·32–21·0)   |
| Marshall Islands                 | 65 plus       | 1·08<br>(0·357–2·00)  | 0·0270<br>(0–0·102)    | 1·11<br>(0·363–2·05)  |
| Marshall Islands                 | 15 to 95 plus | 90·3<br>(85·8–97·7)   | 9·69<br>(2·32–14·2)    | 100<br>(100–100)      |
| Micronesia (Federated States of) | 15 to 39      | 70·8<br>(59·0–89·9)   | 16·7<br>(2·00–26·1)    | 87·5<br>(77·7–96·4)   |
| Micronesia (Federated States of) | 40 to 64      | 10·8<br>(3·27–18·7)   | 0·984<br>(0·0954–2·32) | 11·8<br>(3·42–20·7)   |
| Micronesia (Federated States of) | 65 plus       | 0·715<br>(0·165–1·52) | 0·0222<br>(0–0·101)    | 0·737<br>(0·165–1·60) |
| Micronesia (Federated States of) | 15 to 95 plus | 82·3<br>(72·7–97·7)   | 17·7<br>(2·28–27·3)    | 100<br>(100–100)      |
| Nauru                            | 15 to 39      | 64·8<br>(55·9–81·8)   | 19·5<br>(4·78–27·5)    | 84·3<br>(77·9–91·3)   |
| Nauru                            | 40 to 64      | 12·6<br>(7·34–17·1)   | 1·92<br>(0·402–3·72)   | 14·5<br>(8·03–20·2)   |
| Nauru                            | 65 plus       | 1·12<br>(0·424–1·91)  | 0·0809<br>(0–0·304)    | 1·20<br>(0·452–2·11)  |
| Nauru                            | 15 to 95 plus | 78·5<br>(70·5–94·5)   | 21·5<br>(5·51–29·5)    | 100<br>(100–100)      |
| Niue                             | 15 to 39      | 49·1<br>(37·9–69·2)   | 20·9<br>(5·88–29·7)    | 70·1<br>(59·1–87·1)   |
| Niue                             | 40 to 64      | 22·4<br>(10·4–30·3)   | 4·29<br>(0–8·50)       | 26·7<br>(11·4–36·4)   |
| Niue                             | 65 plus       | 3·00<br>(0·543–5·39)  | 0·229<br>(0–1·05)      | 3·23<br>(0·543–5·84)  |
| Niue                             | 15 to 95 plus | 74·5<br>(66·1–91·1)   | 25·5<br>(8·90–33·9)    | 100<br>(100–100)      |
| Northern Mariana Islands         | 15 to 39      | 60·0<br>(43·1–90·0)   | 14·4<br>(1·83–24·7)    | 74·4<br>(56·8–98·4)   |
| Northern Mariana Islands         | 40 to 64      | 21·3<br>(1·55–34·2)   | 2·11<br>(0–5·44)       | 23·4<br>(1·55–39·0)   |
| Northern Mariana Islands         | 65 plus       | 2·16<br>(0·0459–4·34) | 0·0896<br>(0–0·377)    | 2·25<br>(0·0459–4·65) |
| Northern Mariana Islands         | 15 to 95 plus | 83·4<br>(74·1–97·9)   | 16·6<br>(2·08–25·9)    | 100<br>(100–100)      |
| Palau                            | 15 to 39      | 60·8<br>(44·4–85·8)   | 14·9<br>(2·97–23·4)    | 75·6<br>(58·6–95·7)   |
| Palau                            | 40 to 64      | 19·0<br>(3·69–30·1)   | 3·49<br>(0·140–8·19)   | 22·5<br>(4·10–37·4)   |

|                  |               |                         |                            |                         |
|------------------|---------------|-------------------------|----------------------------|-------------------------|
| Palau            | 65 plus       | 1-68<br>(0-130-3-63)    | 0-163<br>(0-0-614)         | 1-85<br>(0-130-4-16)    |
| Palau            | 15 to 95 plus | 81-5<br>(73-5-95-3)     | 18-5<br>(4-68-26-5)        | 100<br>(100-100)        |
| Papua New Guinea | 15 to 39      | 76-6<br>(68-1-88-9)     | 11-2<br>(2-53-16-9)        | 87-8<br>(81-2-94-8)     |
| Papua New Guinea | 40 to 64      | 10-6<br>(4-61-16-1)     | 0-970<br>(0-210-1-93)      | 11-5<br>(4-91-17-5)     |
| Papua New Guinea | 65 plus       | 0-690<br>(0-247-1-29)   | 0-0267<br>(0-00298-0-0799) | 0-717<br>(0-249-1-34)   |
| Papua New Guinea | 15 to 95 plus | 87-8<br>(81-9-96-8)     | 12-2<br>(3-21-18-1)        | 100<br>(100-100)        |
| Samoa            | 15 to 39      | 72-6<br>(62-2-87-2)     | 9-91<br>(2-18-15-3)        | 82-5<br>(73-0-92-8)     |
| Samoa            | 40 to 64      | 15-5<br>(6-49-23-6)     | 0-586<br>(0-0832-1-24)     | 16-1<br>(6-65-24-7)     |
| Samoa            | 65 plus       | 1-39<br>(0-426-2-64)    | 0-0158<br>(0-0-0560)       | 1-41<br>(0-430-2-68)    |
| Samoa            | 15 to 95 plus | 89-5<br>(84-2-97-4)     | 10-5<br>(2-59-15-8)        | 100<br>(100-100)        |
| Solomon Islands  | 15 to 39      | 78-7<br>(66-2-97-2)     | 15-1<br>(0-710-25-8)       | 93-8<br>(86-4-99-3)     |
| Solomon Islands  | 40 to 64      | 5-63<br>(0-670-12-0)    | 0-350<br>(0-00998-1-03)    | 5-98<br>(0-695-13-0)    |
| Solomon Islands  | 65 plus       | 0-227<br>(0-0143-0-718) | 0-00364<br>(0-0-0198)      | 0-231<br>(0-0143-0-742) |
| Solomon Islands  | 15 to 95 plus | 84-5<br>(73-4-99-3)     | 15-5<br>(0-736-26-6)       | 100<br>(100-100)        |
| Tokelau          | 15 to 39      | 63-8<br>(51-3-81-6)     | 15-6<br>(3-24-23-9)        | 79-4<br>(67-6-92-8)     |
| Tokelau          | 40 to 64      | 16-0<br>(5-62-24-3)     | 1-70<br>(0-4-66)           | 17-7<br>(6-01-27-7)     |
| Tokelau          | 65 plus       | 2-78<br>(0-6-10)        | 0-126<br>(0-0-954)         | 2-91<br>(0-6-36)        |
| Tokelau          | 15 to 95 plus | 82-5<br>(73-9-95-3)     | 17-5<br>(4-70-26-1)        | 100<br>(100-100)        |
| Tonga            | 15 to 39      | 71-7<br>(59-3-90-0)     | 16-1<br>(3-85-23-7)        | 87-8<br>(76-9-97-8)     |
| Tonga            | 40 to 64      | 9-27<br>(1-71-17-0)     | 1-76<br>(0-207-3-92)       | 11-0<br>(2-00-20-4)     |
| Tonga            | 65 plus       | 0-999<br>(0-101-2-39)   | 0-133<br>(0-0-433)         | 1-13<br>(0-101-2-80)    |
| Tonga            | 15 to 95 plus | 82-0<br>(74-1-94-8)     | 18-0<br>(5-18-25-9)        | 100<br>(100-100)        |
| Tuvalu           | 15 to 39      | 73-9<br>(61-1-92-3)     | 14-8<br>(1-42-24-5)        | 88-7<br>(78-8-97-2)     |
| Tuvalu           | 40 to 64      | 9-51<br>(2-47-17-2)     | 0-790<br>(0-2-12)          | 10-3<br>(2-59-18-8)     |
| Tuvalu           | 65 plus       | 0-928<br>(0-0801-2-25)  | 0-0322<br>(0-0-212)        | 0-961<br>(0-0846-2-40)  |
| Tuvalu           | 15 to 95 plus | 84-4<br>(74-6-98-2)     | 15-6<br>(1-85-25-4)        | 100<br>(100-100)        |
| Vanuatu          | 15 to 39      | 71-0<br>(61-6-85-1)     | 15-6<br>(3-61-23-5)        | 86-6<br>(79-9-93-8)     |
| Vanuatu          | 40 to 64      | 11-4<br>(5-48-17-0)     | 1-01<br>(0-194-2-03)       | 12-5<br>(5-72-18-4)     |
| Vanuatu          | 65 plus       | 0-939<br>(0-370-1-71)   | 0-0370<br>(0-0-114)        | 0-976<br>(0-379-1-80)   |
| Vanuatu          | 15 to 95 plus | 83-4<br>(75-4-96-0)     | 16-6<br>(4-05-24-6)        | 100<br>(100-100)        |
| Southeast Asia   | 15 to 39      | 57-1<br>(52-9-63-3)     | 8-59<br>(3-89-11-7)        | 65-7<br>(61-8-69-8)     |

|                                  |               |               |                  |               |
|----------------------------------|---------------|---------------|------------------|---------------|
|                                  |               | 27.2          | 3.15             | 30.3          |
| Southeast Asia                   | 40 to 64      | (24.7-30.1)   | (2.19-4.03)      | (27.1-33.6)   |
|                                  |               | 3.58          | 0.373            | 3.96          |
| Southeast Asia                   | 65 plus       | (2.70-4.25)   | (0.216-0.520)    | (2.96-4.73)   |
|                                  |               | 87.9          | 12.1             | 100           |
| Southeast Asia                   | 15 to 95 plus | (84.2-93.2)   | (6.82-15.8)      | (100-100)     |
|                                  |               | 50.3          | 20.3             | 70.6          |
| Cambodia                         | 15 to 39      | (45.0-58.9)   | (11.8-25.9)      | (67.3-73.9)   |
|                                  |               | 18.8          | 7.59             | 26.4          |
| Cambodia                         | 40 to 64      | (16.7-21.4)   | (5.48-9.50)      | (23.4-29.3)   |
|                                  |               | 2.21          | 0.800            | 3.01          |
| Cambodia                         | 65 plus       | (1.72-2.71)   | (0.475-1.20)     | (2.31-3.68)   |
|                                  |               | 71.3          | 28.7             | 100           |
| Cambodia                         | 15 to 95 plus | (65.2-81.6)   | (18.4-34.8)      | (100-100)     |
|                                  |               | 71.3          | 5.77             | 77.1          |
| Indonesia                        | 15 to 39      | (61.7-84.1)   | (2.06-8.98)      | (68.7-88.4)   |
|                                  |               | 19.3          | 2.16             | 21.4          |
| Indonesia                        | 40 to 64      | (10.3-26.2)   | (0.735-3.72)     | (11.3-29.1)   |
|                                  |               | 1.29          | 0.189            | 1.48          |
| Indonesia                        | 65 plus       | (0.331-2.35)  | (0.0309-0.395)   | (0.362-2.69)  |
|                                  |               | 91.9          | 8.12             | 100           |
| Indonesia                        | 15 to 95 plus | (87.8-96.6)   | (3.38-12.2)      | (100-100)     |
|                                  |               | 52.8          | 22.4             | 75.3          |
| Lao People's Democratic Republic | 15 to 39      | (47.9-61.8)   | (13.3-26.7)      | (71.2-79.3)   |
|                                  |               | 17.2          | 5.30             | 22.5          |
| Lao People's Democratic Republic | 40 to 64      | (14.9-19.8)   | (3.85-6.80)      | (19.1-26.0)   |
|                                  |               | 1.84          | 0.349            | 2.19          |
| Lao People's Democratic Republic | 65 plus       | (1.17-2.39)   | (0.168-0.574)    | (1.36-2.89)   |
|                                  |               | 71.9          | 28.1             | 100           |
| Lao People's Democratic Republic | 15 to 95 plus | (67.4-81.9)   | (18.1-32.6)      | (100-100)     |
|                                  |               | 62.4          | 12.1             | 74.5          |
| Malaysia                         | 15 to 39      | (55.3-72.7)   | (5.63-16.4)      | (68.6-81.7)   |
|                                  |               | 18.8          | 4.04             | 22.9          |
| Malaysia                         | 40 to 64      | (14.2-22.9)   | (2.25-5.84)      | (16.7-28.1)   |
|                                  |               | 2.13          | 0.499            | 2.63          |
| Malaysia                         | 65 plus       | (1.10-3.07)   | (0.212-0.900)    | (1.35-3.82)   |
|                                  |               | 83.4          | 16.6             | 100           |
| Malaysia                         | 15 to 95 plus | (78.4-90.7)   | (9.33-21.6)      | (100-100)     |
|                                  |               | 81.6          | 3.22             | 84.8          |
| Maldives                         | 15 to 39      | (71.9-92.2)   | (0.307-6.52)     | (76.3-93.9)   |
|                                  |               | 14.4          | 0.361            | 14.8          |
| Maldives                         | 40 to 64      | (5.97-22.3)   | (0.0235-0.979)   | (5.99-22.9)   |
|                                  |               | 0.444         | 0.0119           | 0.456         |
| Maldives                         | 65 plus       | (0.0530-1.01) | (0-0.0486)       | (0.0530-1.04) |
|                                  |               | 96.4          | 3.59             | 100           |
| Maldives                         | 15 to 95 plus | (93.1-99.6)   | (0.398-6.95)     | (100-100)     |
|                                  |               | 53.9          | 8.12             | 62.0          |
| Mauritius                        | 15 to 39      | (44.7-66.4)   | (1.04-15.7)      | (53.9-71.3)   |
|                                  |               | 30.5          | 2.11             | 32.6          |
| Mauritius                        | 40 to 64      | (24.8-36.4)   | (0.500-4.07)     | (25.5-38.8)   |
|                                  |               | 5.22          | 0.205            | 5.43          |
| Mauritius                        | 65 plus       | (2.78-7.18)   | (0.0222-0.576)   | (2.83-7.63)   |
|                                  |               | 89.6          | 10.4             | 100           |
| Mauritius                        | 15 to 95 plus | (80.9-97.4)   | (2.56-19.1)      | (100-100)     |
|                                  |               | 64.9          | 2.76             | 67.7          |
| Myanmar                          | 15 to 39      | (60.0-70.6)   | (0.737-4.71)     | (63.2-72.2)   |
|                                  |               | 28.6          | 0.636            | 29.2          |
| Myanmar                          | 40 to 64      | (24.9-32.6)   | (0.206-1.21)     | (25.3-33.2)   |
|                                  |               | 3.07          | 0.0288           | 3.10          |
| Myanmar                          | 65 plus       | (2.06-4.01)   | (0.00613-0.0648) | (2.07-4.06)   |
|                                  |               | 96.6          | 3.42             | 100           |
| Myanmar                          | 15 to 95 plus | (94.2-99.0)   | (1.05-5.83)      | (100-100)     |

|                            |               |                      |                         |                      |
|----------------------------|---------------|----------------------|-------------------------|----------------------|
| Philippines                | 15 to 39      | 56.6<br>(51.8–64.3)  | 13.6<br>(7.16–17.7)     | 70.2<br>(66.0–74.4)  |
| Philippines                | 40 to 64      | 22.1<br>(19.9–25.0)  | 4.69<br>(3.31–6.08)     | 26.8<br>(23.6–30.4)  |
| Philippines                | 65 plus       | 2.37<br>(1.65–2.93)  | 0.581<br>(0.315–0.856)  | 2.95<br>(2.05–3.69)  |
| Philippines                | 15 to 95 plus | 81.1<br>(76.5–88.2)  | 18.9<br>(11.8–23.5)     | 100<br>(100–100)     |
| Seychelles                 | 15 to 39      | 55.9<br>(51.0–62.6)  | 5.01<br>(1.89–7.41)     | 60.9<br>(56.1–66.7)  |
| Seychelles                 | 40 to 64      | 32.9<br>(28.9–36.9)  | 2.47<br>(1.27–3.75)     | 35.4<br>(30.5–39.6)  |
| Seychelles                 | 65 plus       | 3.47<br>(2.43–4.47)  | 0.254<br>(0.0888–0.480) | 3.73<br>(2.56–4.83)  |
| Seychelles                 | 15 to 95 plus | 92.3<br>(89.2–96.5)  | 7.73<br>(3.55–10.8)     | 100<br>(100–100)     |
| Sri Lanka                  | 15 to 39      | 50.1<br>(45.8–54.2)  | 2.10<br>(1.02–3.04)     | 52.2<br>(48.0–56.3)  |
| Sri Lanka                  | 40 to 64      | 38.4<br>(34.9–42.1)  | 1.49<br>(1.04–1.99)     | 39.9<br>(36.2–43.7)  |
| Sri Lanka                  | 65 plus       | 7.58<br>(6.07–9.22)  | 0.348<br>(0.224–0.484)  | 7.92<br>(6.34–9.61)  |
| Sri Lanka                  | 15 to 95 plus | 96.1<br>(94.9–97.4)  | 3.94<br>(2.64–5.10)     | 100<br>(100–100)     |
| Thailand                   | 15 to 39      | 46.4<br>(42.5–51.3)  | 5.56<br>(2.61–7.65)     | 52.0<br>(48.4–56.2)  |
| Thailand                   | 40 to 64      | 37.2<br>(34.2–40.5)  | 3.98<br>(2.71–5.37)     | 41.2<br>(37.8–44.6)  |
| Thailand                   | 65 plus       | 6.23<br>(5.05–7.47)  | 0.588<br>(0.331–0.886)  | 6.82<br>(5.46–8.15)  |
| Thailand                   | 15 to 95 plus | 89.9<br>(86.9–93.6)  | 10.1<br>(6.42–13.1)     | 100<br>(100–100)     |
| Timor-Leste                | 15 to 39      | 63.6<br>(57.9–70.7)  | 4.55<br>(1.75–7.11)     | 68.2<br>(62.8–73.7)  |
| Timor-Leste                | 40 to 64      | 25.5<br>(21.4–29.6)  | 1.67<br>(0.940–2.51)    | 27.2<br>(22.7–31.6)  |
| Timor-Leste                | 65 plus       | 4.30<br>(2.92–5.60)  | 0.306<br>(0.126–0.522)  | 4.61<br>(3.08–6.02)  |
| Timor-Leste                | 15 to 95 plus | 93.5<br>(90.4–96.8)  | 6.53<br>(3.24–9.57)     | 100<br>(100–100)     |
| Viet Nam                   | 15 to 39      | 58.8<br>(54.2–65.5)  | 4.13<br>(0.519–8.06)    | 63.0<br>(59.1–67.3)  |
| Viet Nam                   | 40 to 64      | 31.3<br>(28.5–34.2)  | 1.17<br>(0.374–2.15)    | 32.5<br>(29.0–35.6)  |
| Viet Nam                   | 65 plus       | 4.47<br>(3.24–5.34)  | 0.103<br>(0.0228–0.223) | 4.57<br>(3.28–5.49)  |
| Viet Nam                   | 15 to 95 plus | 94.6<br>(89.8–99.0)  | 5.40<br>(1.03–10.2)     | 100<br>(100–100)     |
| Central Sub-Saharan Africa | 15 to 39      | 54.4<br>(45.8–82.4)  | 22.8<br>(1.29–28.8)     | 77.2<br>(71.1–86.0)  |
| Central Sub-Saharan Africa | 40 to 64      | 15.6<br>(10.5–19.4)  | 5.54<br>(1.09–8.13)     | 21.1<br>(13.0–26.7)  |
| Central Sub-Saharan Africa | 65 plus       | 1.24<br>(0.614–1.77) | 0.465<br>(0.112–0.831)  | 1.71<br>(0.738–2.53) |
| Central Sub-Saharan Africa | 15 to 95 plus | 71.2<br>(64.4–97.2)  | 28.8<br>(2.80–35.6)     | 100<br>(100–100)     |
| Angola                     | 15 to 39      | 51.6<br>(45.3–71.1)  | 20.2<br>(3.26–25.3)     | 71.7<br>(67.6–77.6)  |
| Angola                     | 40 to 64      | 19.3<br>(16.6–22.6)  | 6.79<br>(2.62–9.11)     | 26.1<br>(20.9–29.9)  |
| Angola                     | 65 plus       | 1.67<br>(1.21–2.12)  | 0.458<br>(0.184–0.736)  | 2.13<br>(1.50–2.72)  |

|                                  |               |                       |                         |                      |
|----------------------------------|---------------|-----------------------|-------------------------|----------------------|
| Angola                           | 15 to 95 plus | 72.6<br>(66.8–93.8)   | 27.4<br>(6.22–33.2)     | 100<br>(100–100)     |
| Central African Republic         | 15 to 39      | 56.5<br>(45.3–91.4)   | 24.2<br>(0.207–31.8)    | 80.7<br>(73.3–93.1)  |
| Central African Republic         | 40 to 64      | 13.7<br>(5.57–18.6)   | 4.62<br>(0.278–7.79)    | 18.3<br>(6.47–25.3)  |
| Central African Republic         | 65 plus       | 0.724<br>(0.191–1.20) | 0.310<br>(0.0208–0.655) | 1.03<br>(0.250–1.81) |
| Central African Republic         | 15 to 95 plus | 70.8<br>(62.3–99.2)   | 29.2<br>(0.781–37.7)    | 100<br>(100–100)     |
| Congo                            | 15 to 39      | 43.7<br>(35.9–75.9)   | 30.4<br>(2.73–36.8)     | 74.0<br>(68.3–83.4)  |
| Congo                            | 40 to 64      | 16.2<br>(12.3–19.9)   | 7.53<br>(1.71–10.6)     | 23.8<br>(15.5–29.1)  |
| Congo                            | 65 plus       | 1.55<br>(0.848–2.09)  | 0.663<br>(0.169–1.14)   | 2.21<br>(1.07–3.11)  |
| Congo                            | 15 to 95 plus | 61.4<br>(54.4–94.6)   | 38.6<br>(5.42–45.6)     | 100<br>(100–100)     |
| Democratic Republic of the Congo | 15 to 39      | 56.7<br>(46.3–89.4)   | 22.8<br>(0.200–30.1)    | 79.5<br>(71.9–91.2)  |
| Democratic Republic of the Congo | 40 to 64      | 14.2<br>(7.37–19.1)   | 4.87<br>(0.309–7.91)    | 19.1<br>(8.03–26.0)  |
| Democratic Republic of the Congo | 65 plus       | 1.04<br>(0.273–1.67)  | 0.436<br>(0.0445–0.896) | 1.48<br>(0.366–2.49) |
| Democratic Republic of the Congo | 15 to 95 plus | 71.9<br>(63.9–99.3)   | 28.1<br>(0.715–36.1)    | 100<br>(100–100)     |
| Equatorial Guinea                | 15 to 39      | 59.5<br>(52.6–81.2)   | 20.1<br>(2.27–25.8)     | 79.7<br>(75.7–85.5)  |
| Equatorial Guinea                | 40 to 64      | 12.7<br>(10.3–15.1)   | 5.60<br>(1.65–7.91)     | 18.3<br>(13.2–21.9)  |
| Equatorial Guinea                | 65 plus       | 1.36<br>(0.854–1.75)  | 0.620<br>(0.220–0.997)  | 1.98<br>(1.15–2.67)  |
| Equatorial Guinea                | 15 to 95 plus | 73.6<br>(67.1–95.4)   | 26.4<br>(4.58–32.9)     | 100<br>(100–100)     |
| Gabon                            | 15 to 39      | 45.6<br>(39.4–66.7)   | 21.7<br>(3.17–27.4)     | 67.3<br>(62.8–74.0)  |
| Gabon                            | 40 to 64      | 20.8<br>(17.9–24.5)   | 7.83<br>(2.98–10.7)     | 28.6<br>(23.2–32.5)  |
| Gabon                            | 65 plus       | 3.00<br>(2.19–3.64)   | 1.11<br>(0.470–1.70)    | 4.12<br>(2.75–5.16)  |
| Gabon                            | 15 to 95 plus | 69.4<br>(63.3–92.8)   | 30.6<br>(7.21–36.7)     | 100<br>(100–100)     |
| Eastern Sub-Saharan Africa       | 15 to 39      | 54.3<br>(46.6–67.9)   | 21.3<br>(7.16–27.2)     | 75.6<br>(70.9–80.0)  |
| Eastern Sub-Saharan Africa       | 40 to 64      | 16.2<br>(13.7–19.2)   | 5.57<br>(3.82–7.17)     | 21.7<br>(17.8–25.8)  |
| Eastern Sub-Saharan Africa       | 65 plus       | 2.01<br>(1.49–2.55)   | 0.640<br>(0.411–0.875)  | 2.65<br>(1.94–3.34)  |
| Eastern Sub-Saharan Africa       | 15 to 95 plus | 72.4<br>(65.5–86.5)   | 27.6<br>(13.5–34.5)     | 100<br>(100–100)     |
| Burundi                          | 15 to 39      | 57.3<br>(51.6–66.7)   | 15.3<br>(5.43–20.3)     | 72.5<br>(68.4–76.9)  |
| Burundi                          | 40 to 64      | 20.2<br>(17.7–23.3)   | 4.26<br>(2.77–5.89)     | 24.5<br>(20.6–28.2)  |
| Burundi                          | 65 plus       | 2.60<br>(1.98–3.25)   | 0.403<br>(0.204–0.604)  | 3.00<br>(2.24–3.73)  |
| Burundi                          | 15 to 95 plus | 80.1<br>(74.5–90.7)   | 19.9<br>(9.29–25.5)     | 100<br>(100–100)     |
| Comoros                          | 15 to 39      | 60.9<br>(52.0–74.7)   | 19.2<br>(9.03–27.3)     | 80.1<br>(73.9–88.1)  |
| Comoros                          | 40 to 64      | 14.5<br>(9.07–19.2)   | 2.77<br>(1.31–4.39)     | 17.3<br>(10.5–22.7)  |

|            |               |                          |                            |                         |
|------------|---------------|--------------------------|----------------------------|-------------------------|
| Comoros    | 65 plus       | 2.05<br>(0.949–3.07)     | 0.535<br>(0.181–0.891)     | 2.59<br>(1.12–3.80)     |
| Comoros    | 15 to 95 plus | 77.5<br>(69.7–88.4)      | 22.5<br>(11.6–30.3)        | 100<br>(100–100)        |
| Djibouti   | 15 to 39      | 75.8<br>(52.6–98.3)      | 13.3<br>(0.0900–25.0)      | 89.0<br>(74.3–99.4)     |
| Djibouti   | 40 to 64      | 8.96<br>(0.488–20.1)     | 1.75<br>(0.0635–4.65)      | 10.7<br>(0.554–24.6)    |
| Djibouti   | 65 plus       | 0.221<br>(0.00897–0.642) | 0.0399<br>(0–0.139)        | 0.261<br>(0.0109–0.747) |
| Djibouti   | 15 to 95 plus | 84.9<br>(72.2–99.5)      | 15.1<br>(0.473–27.8)       | 100<br>(100–100)        |
| Eritrea    | 15 to 39      | 65.1<br>(45.3–87.1)      | 18.6<br>(0.491–33.3)       | 83.8<br>(75.6–93.1)     |
| Eritrea    | 40 to 64      | 13.6<br>(6.41–18.9)      | 1.76<br>(0.0295–6.10)      | 15.4<br>(6.50–23.4)     |
| Eritrea    | 65 plus       | 0.791<br>(0.250–1.31)    | 0.0515<br>(0.000351–0.196) | 0.843<br>(0.252–1.49)   |
| Eritrea    | 15 to 95 plus | 79.6<br>(61.7–99.3)      | 20.4<br>(0.731–38.3)       | 100<br>(100–100)        |
| Ethiopia   | 15 to 39      | 52.0<br>(42.8–72.4)      | 27.0<br>(7.03–34.8)        | 79.0<br>(73.8–85.3)     |
| Ethiopia   | 40 to 64      | 13.0<br>(9.88–15.9)      | 5.70<br>(2.87–8.15)        | 18.7<br>(13.1–23.3)     |
| Ethiopia   | 65 plus       | 1.75<br>(1.11–2.36)      | 0.582<br>(0.229–0.955)     | 2.33<br>(1.34–3.18)     |
| Ethiopia   | 15 to 95 plus | 66.7<br>(57.7–88.2)      | 33.3<br>(11.8–42.3)        | 100<br>(100–100)        |
| Kenya      | 15 to 39      | 59.2<br>(52.8–68.3)      | 10.0<br>(3.34–13.7)        | 69.2<br>(64.1–75.2)     |
| Kenya      | 40 to 64      | 23.2<br>(19.0–27.0)      | 3.79<br>(2.50–5.08)        | 27.0<br>(21.9–31.8)     |
| Kenya      | 65 plus       | 3.02<br>(2.20–3.77)      | 0.693<br>(0.393–0.980)     | 3.72<br>(2.68–4.68)     |
| Kenya      | 15 to 95 plus | 85.5<br>(81.3–92.2)      | 14.5<br>(7.78–18.7)        | 100<br>(100–100)        |
| Madagascar | 15 to 39      | 61.3<br>(50.4–79.4)      | 16.8<br>(2.59–24.3)        | 78.0<br>(70.8–87.0)     |
| Madagascar | 40 to 64      | 16.5<br>(10.5–21.0)      | 4.02<br>(1.47–6.61)        | 20.5<br>(12.3–27.4)     |
| Madagascar | 65 plus       | 1.20<br>(0.605–1.76)     | 0.263<br>(0.0708–0.485)    | 1.46<br>(0.700–2.18)    |
| Madagascar | 15 to 95 plus | 79.0<br>(70.7–94.1)      | 21.0<br>(5.89–29.3)        | 100<br>(100–100)        |
| Malawi     | 15 to 39      | 66.5<br>(61.3–72.9)      | 6.94<br>(2.75–9.60)        | 73.4<br>(69.0–77.7)     |
| Malawi     | 40 to 64      | 21.2<br>(18.0–24.7)      | 2.74<br>(1.71–3.82)        | 23.9<br>(19.9–27.9)     |
| Malawi     | 65 plus       | 2.21<br>(1.57–2.83)      | 0.486<br>(0.254–0.756)     | 2.69<br>(1.88–3.46)     |
| Malawi     | 15 to 95 plus | 89.8<br>(86.7–94.8)      | 10.2<br>(5.24–13.3)        | 100<br>(100–100)        |
| Mozambique | 15 to 39      | 59.2<br>(45.3–85.7)      | 23.6<br>(1.84–33.9)        | 82.8<br>(75.8–91.1)     |
| Mozambique | 40 to 64      | 12.1<br>(6.85–16.6)      | 3.89<br>(1.09–6.70)        | 16.0<br>(8.31–22.8)     |
| Mozambique | 65 plus       | 1.01<br>(0.433–1.60)     | 0.219<br>(0.0440–0.452)    | 1.23<br>(0.495–1.98)    |
| Mozambique | 15 to 95 plus | 72.3<br>(60.6–96.0)      | 27.7<br>(3.97–39.4)        | 100<br>(100–100)        |
| Rwanda     | 15 to 39      | 50.7<br>(44.1–63.4)      | 24.0<br>(10.1–30.3)        | 74.7<br>(70.7–78.9)     |

|                             |               |                          |                            |                          |
|-----------------------------|---------------|--------------------------|----------------------------|--------------------------|
| Rwanda                      | 40 to 64      | 15.6<br>(13.5–18.5)      | 7.22<br>(4.83–9.70)        | 22.8<br>(19.1–26.5)      |
| Rwanda                      | 65 plus       | 1.80<br>(1.40–2.24)      | 0.691<br>(0.389–1.03)      | 2.49<br>(1.84–3.10)      |
| Rwanda                      | 15 to 95 plus | 68.1<br>(61.1–83.4)      | 31.9<br>(16.6–38.9)        | 100<br>(100–100)         |
| Somalia                     | 15 to 39      | 75.1<br>(0–100)          | 11.7<br>(0–39.9)           | 86.8<br>(0–100)          |
| Somalia                     | 40 to 64      | 0.640<br>(0–11.2)        | 0.113<br>(0–0.0000663)     | 0.753<br>(0–13.2)        |
| Somalia                     | 65 plus       | 0.00105<br>(0–0)         | 0.000693<br>(0–0)          | 0.00174<br>(0–0)         |
| Somalia                     | 15 to 95 plus | 75.7<br>(0–100)          | 11.9<br>(0–40.7)           | 87.6<br>(0–100)          |
| South Sudan                 | 15 to 39      | 76.3<br>(54.7–99.0)      | 15.7<br>(0.0394–29.3)      | 92.0<br>(80.3–99.6)      |
| South Sudan                 | 40 to 64      | 6.24<br>(0.314–15.7)     | 1.51<br>(0.0358–4.35)      | 7.75<br>(0.397–19.3)     |
| South Sudan                 | 65 plus       | 0.153<br>(0.00295–0.514) | 0.0541<br>(0.000186–0.142) | 0.207<br>(0.00361–0.638) |
| South Sudan                 | 15 to 95 plus | 82.7<br>(68.2–99.8)      | 17.3<br>(0.203–31.8)       | 100<br>(100–100)         |
| Uganda                      | 15 to 39      | 51.5<br>(46.1–60.1)      | 23.6<br>(13.0–29.3)        | 75.1<br>(71.5–78.2)      |
| Uganda                      | 40 to 64      | 15.9<br>(14.0–18.6)      | 6.60<br>(4.92–8.31)        | 22.5<br>(19.7–25.8)      |
| Uganda                      | 65 plus       | 1.70<br>(1.37–2.06)      | 0.704<br>(0.463–0.990)     | 2.41<br>(1.93–2.90)      |
| Uganda                      | 15 to 95 plus | 69.1<br>(63.2–79.8)      | 30.9<br>(20.2–36.8)        | 100<br>(100–100)         |
| United Republic of Tanzania | 15 to 39      | 41.8<br>(37.3–47.6)      | 19.6<br>(12.9–24.1)        | 61.5<br>(57.0–65.2)      |
| United Republic of Tanzania | 40 to 64      | 22.0<br>(19.3–25.0)      | 10.9<br>(8.96–13.1)        | 32.9<br>(29.6–36.6)      |
| United Republic of Tanzania | 65 plus       | 3.94<br>(3.27–4.72)      | 1.69<br>(1.26–2.16)        | 5.63<br>(4.63–6.65)      |
| United Republic of Tanzania | 15 to 95 plus | 67.8<br>(63.1–74.5)      | 32.2<br>(25.5–36.9)        | 100<br>(100–100)         |
| Zambia                      | 15 to 39      | 56.1<br>(49.6–67.9)      | 18.4<br>(6.56–24.2)        | 74.5<br>(70.7–78.4)      |
| Zambia                      | 40 to 64      | 18.3<br>(15.9–21.2)      | 5.04<br>(3.08–6.87)        | 23.3<br>(19.9–26.8)      |
| Zambia                      | 65 plus       | 1.69<br>(1.27–2.13)      | 0.511<br>(0.268–0.770)     | 2.20<br>(1.59–2.79)      |
| Zambia                      | 15 to 95 plus | 76.0<br>(69.4–89.3)      | 24.0<br>(10.7–30.6)        | 100<br>(100–100)         |
| Southern Sub-Saharan Africa | 15 to 39      | 50.9<br>(46.3–66.2)      | 16.8<br>(4.28–20.1)        | 67.7<br>(64.2–71.9)      |
| Southern Sub-Saharan Africa | 40 to 64      | 21.6<br>(18.9–23.6)      | 6.93<br>(5.51–8.49)        | 28.5<br>(24.9–31.6)      |
| Southern Sub-Saharan Africa | 65 plus       | 2.78<br>(2.17–3.28)      | 1.06<br>(0.778–1.39)       | 3.84<br>(3.00–4.58)      |
| Southern Sub-Saharan Africa | 15 to 95 plus | 75.2<br>(71.7–88.5)      | 24.8<br>(11.5–28.3)        | 100<br>(100–100)         |
| Botswana                    | 15 to 39      | 52.9<br>(46.9–72.7)      | 20.0<br>(3.49–25.0)        | 72.9<br>(69.0–77.9)      |
| Botswana                    | 40 to 64      | 19.4<br>(16.2–22.4)      | 5.73<br>(3.82–7.53)        | 25.2<br>(20.4–28.9)      |
| Botswana                    | 65 plus       | 1.49<br>(0.985–1.96)     | 0.425<br>(0.251–0.682)     | 1.91<br>(1.27–2.51)      |
| Botswana                    | 15 to 95 plus | 73.8<br>(68.5–91.4)      | 26.2<br>(8.59–31.5)        | 100<br>(100–100)         |



|                            |               |                      |                         |                      |
|----------------------------|---------------|----------------------|-------------------------|----------------------|
| Eswatini                   | 15 to 39      | 56.5<br>(51.3–70.5)  | 14.8<br>(3.29–18.8)     | 71.3<br>(68.0–75.2)  |
| Eswatini                   | 40 to 64      | 19.9<br>(17.2–22.5)  | 5.40<br>(3.87–6.91)     | 25.3<br>(21.8–28.4)  |
| Eswatini                   | 65 plus       | 2.25<br>(1.76–2.71)  | 1.12<br>(0.723–1.54)    | 3.37<br>(2.61–4.17)  |
| Eswatini                   | 15 to 95 plus | 78.7<br>(74.3–91.2)  | 21.3<br>(8.80–25.7)     | 100<br>(100–100)     |
| Lesotho                    | 15 to 39      | 54.6<br>(47.2–81.6)  | 21.6<br>(1.40–27.1)     | 76.2<br>(71.2–84.1)  |
| Lesotho                    | 40 to 64      | 16.1<br>(11.2–18.9)  | 5.53<br>(3.02–7.77)     | 21.6<br>(14.5–26.1)  |
| Lesotho                    | 65 plus       | 1.64<br>(0.858–2.29) | 0.549<br>(0.221–0.952)  | 2.18<br>(1.09–3.19)  |
| Lesotho                    | 15 to 95 plus | 72.4<br>(66.3–94.5)  | 27.6<br>(5.52–33.7)     | 100<br>(100–100)     |
| Namibia                    | 15 to 39      | 46.8<br>(41.3–66.1)  | 24.1<br>(6.72–29.1)     | 70.9<br>(66.9–75.8)  |
| Namibia                    | 40 to 64      | 16.1<br>(13.6–18.1)  | 9.34<br>(7.18–11.6)     | 25.4<br>(21.3–28.9)  |
| Namibia                    | 65 plus       | 2.13<br>(1.50–2.72)  | 1.58<br>(0.971–2.33)    | 3.71<br>(2.55–4.84)  |
| Namibia                    | 15 to 95 plus | 65.0<br>(60.1–82.6)  | 35.0<br>(17.4–39.9)     | 100<br>(100–100)     |
| South Africa               | 15 to 39      | 48.4<br>(43.7–62.9)  | 17.6<br>(4.75–21.2)     | 65.9<br>(62.4–69.7)  |
| South Africa               | 40 to 64      | 22.2<br>(19.9–24.5)  | 7.68<br>(6.07–9.51)     | 29.9<br>(26.8–33.0)  |
| South Africa               | 65 plus       | 3.03<br>(2.40–3.59)  | 1.19<br>(0.867–1.58)    | 4.21<br>(3.34–5.01)  |
| South Africa               | 15 to 95 plus | 73.6<br>(69.5–87.0)  | 26.4<br>(13.0–30.5)     | 100<br>(100–100)     |
| Zimbabwe                   | 15 to 39      | 64.5<br>(58.2–83.2)  | 9.29<br>(0.483–12.6)    | 73.8<br>(68.7–84.0)  |
| Zimbabwe                   | 40 to 64      | 21.0<br>(13.1–24.6)  | 2.73<br>(1.36–4.04)     | 23.8<br>(14.4–28.1)  |
| Zimbabwe                   | 65 plus       | 2.02<br>(1.00–2.79)  | 0.401<br>(0.168–0.680)  | 2.42<br>(1.22–3.39)  |
| Zimbabwe                   | 15 to 95 plus | 87.6<br>(83.8–97.7)  | 12.4<br>(2.29–16.2)     | 100<br>(100–100)     |
| Western Sub-Saharan Africa | 15 to 39      | 51.1<br>(44.9–57.6)  | 20.0<br>(14.8–25.5)     | 71.0<br>(67.1–75.5)  |
| Western Sub-Saharan Africa | 40 to 64      | 18.2<br>(15.9–20.5)  | 7.41<br>(5.73–8.93)     | 25.6<br>(22.0–28.9)  |
| Western Sub-Saharan Africa | 65 plus       | 2.50<br>(1.84–3.07)  | 0.861<br>(0.493–1.19)   | 3.37<br>(2.35–4.21)  |
| Western Sub-Saharan Africa | 15 to 95 plus | 71.8<br>(65.8–77.7)  | 28.2<br>(22.3–34.2)     | 100<br>(100–100)     |
| Benin                      | 15 to 39      | 53.5<br>(43.1–65.9)  | 23.5<br>(14.6–32.8)     | 77.0<br>(71.4–83.9)  |
| Benin                      | 40 to 64      | 15.0<br>(11.4–18.5)  | 6.42<br>(3.68–9.13)     | 21.4<br>(15.2–26.3)  |
| Benin                      | 65 plus       | 1.29<br>(0.599–1.86) | 0.316<br>(0.0648–0.634) | 1.60<br>(0.644–2.42) |
| Benin                      | 15 to 95 plus | 69.8<br>(60.1–80.4)  | 30.2<br>(19.6–39.9)     | 100<br>(100–100)     |
| Burkina Faso               | 15 to 39      | 52.2<br>(46.8–58.1)  | 19.6<br>(15.1–24.3)     | 71.8<br>(68.0–76.0)  |
| Burkina Faso               | 40 to 64      | 16.8<br>(14.5–19.2)  | 6.84<br>(5.12–8.65)     | 23.6<br>(20.4–27.0)  |
| Burkina Faso               | 65 plus       | 3.80<br>(2.75–4.68)  | 0.723<br>(0.400–1.09)   | 4.53<br>(3.17–5.62)  |

|               |               |                      |                         |                      |
|---------------|---------------|----------------------|-------------------------|----------------------|
| Burkina Faso  | 15 to 95 plus | 72.8<br>(67.8–78.1)  | 27.2<br>(21.9–32.2)     | 100<br>(100–100)     |
| Cabo Verde    | 15 to 39      | 60.2<br>(53.4–69.1)  | 10.1<br>(5.69–15.0)     | 70.3<br>(65.5–76.7)  |
| Cabo Verde    | 40 to 64      | 22.9<br>(18.9–26.2)  | 3.93<br>(2.37–5.68)     | 26.8<br>(21.6–30.9)  |
| Cabo Verde    | 65 plus       | 2.52<br>(1.45–3.33)  | 0.366<br>(0.0948–0.694) | 2.89<br>(1.59–3.94)  |
| Cabo Verde    | 15 to 95 plus | 85.6<br>(79.9–91.1)  | 14.4<br>(8.94–20.1)     | 100<br>(100–100)     |
| Cameroon      | 15 to 39      | 48.9<br>(41.2–58.5)  | 24.9<br>(17.0–33.1)     | 73.8<br>(69.6–78.7)  |
| Cameroon      | 40 to 64      | 16.1<br>(13.8–18.5)  | 7.70<br>(5.49–9.89)     | 23.8<br>(19.6–27.3)  |
| Cameroon      | 65 plus       | 1.81<br>(1.21–2.27)  | 0.652<br>(0.233–1.06)   | 2.46<br>(1.50–3.22)  |
| Cameroon      | 15 to 95 plus | 66.8<br>(58.2–76.0)  | 33.2<br>(24.0–41.8)     | 100<br>(100–100)     |
| Chad          | 15 to 39      | 54.5<br>(41.7–75.5)  | 26.9<br>(12.3–39.0)     | 81.3<br>(75.1–90.1)  |
| Chad          | 40 to 64      | 11.7<br>(7.44–15.1)  | 5.41<br>(1.86–8.59)     | 17.2<br>(9.43–22.5)  |
| Chad          | 65 plus       | 1.21<br>(0.335–1.95) | 0.299<br>(0.0208–0.683) | 1.51<br>(0.366–2.58) |
| Chad          | 15 to 95 plus | 67.4<br>(55.2–85.4)  | 32.6<br>(14.6–44.8)     | 100<br>(100–100)     |
| Côte d'Ivoire | 15 to 39      | 54.3<br>(47.1–62.6)  | 17.9<br>(11.8–24.2)     | 72.2<br>(68.1–77.3)  |
| Côte d'Ivoire | 40 to 64      | 19.4<br>(16.9–22.0)  | 5.45<br>(3.36–7.47)     | 24.9<br>(20.8–28.6)  |
| Côte d'Ivoire | 65 plus       | 2.28<br>(1.49–2.89)  | 0.582<br>(0.186–0.977)  | 2.86<br>(1.75–3.70)  |
| Côte d'Ivoire | 15 to 95 plus | 76.0<br>(68.6–83.4)  | 24.0<br>(16.6–31.4)     | 100<br>(100–100)     |
| Gambia        | 15 to 39      | 56.4<br>(47.8–67.4)  | 19.1<br>(11.9–27.3)     | 75.5<br>(70.2–82.1)  |
| Gambia        | 40 to 64      | 16.8<br>(13.1–20.1)  | 5.19<br>(3.04–7.19)     | 22.0<br>(16.6–26.4)  |
| Gambia        | 65 plus       | 2.05<br>(1.04–2.86)  | 0.511<br>(0.132–0.945)  | 2.56<br>(1.16–3.71)  |
| Gambia        | 15 to 95 plus | 75.2<br>(66.6–84.2)  | 24.8<br>(15.8–33.4)     | 100<br>(100–100)     |
| Ghana         | 15 to 39      | 49.4<br>(40.5–61.2)  | 22.4<br>(13.2–31.5)     | 71.8<br>(66.6–78.2)  |
| Ghana         | 40 to 64      | 18.8<br>(15.5–22.0)  | 6.70<br>(4.11–9.33)     | 25.5<br>(20.1–29.9)  |
| Ghana         | 65 plus       | 2.15<br>(1.24–2.87)  | 0.579<br>(0.138–1.06)   | 2.73<br>(1.39–3.85)  |
| Ghana         | 15 to 95 plus | 70.3<br>(60.6–81.9)  | 29.7<br>(18.1–39.4)     | 100<br>(100–100)     |
| Guinea        | 15 to 39      | 72.4<br>(61.8–84.6)  | 5.27<br>(1.89–9.98)     | 77.7<br>(69.4–87.8)  |
| Guinea        | 40 to 64      | 18.5<br>(10.5–25.0)  | 1.42<br>(0.604–2.34)    | 19.9<br>(11.3–27.2)  |
| Guinea        | 65 plus       | 2.31<br>(0.688–3.95) | 0.122<br>(0.0145–0.292) | 2.43<br>(0.702–4.17) |
| Guinea        | 15 to 95 plus | 93.2<br>(88.0–97.1)  | 6.82<br>(2.92–12.0)     | 100<br>(100–100)     |
| Guinea-Bissau | 15 to 39      | 52.0<br>(43.9–62.1)  | 23.1<br>(15.1–30.8)     | 75.0<br>(70.3–80.5)  |
| Guinea-Bissau | 40 to 64      | 15.7<br>(12.7–18.4)  | 7.29<br>(4.86–9.60)     | 23.0<br>(18.3–27.3)  |

|                       |               |                          |                             |                          |
|-----------------------|---------------|--------------------------|-----------------------------|--------------------------|
| Guinea-Bissau         | 65 plus       | 1.55<br>(0.946–2.08)     | 0.462<br>(0.158–0.807)      | 2.01<br>(1.13–2.77)      |
| Guinea-Bissau         | 15 to 95 plus | 69.2<br>(60.5–78.6)      | 30.8<br>(21.4–39.5)         | 100<br>(100–100)         |
| Liberia               | 15 to 39      | 52.6<br>(46.4–60.4)      | 22.2<br>(17.1–28.1)         | 74.8<br>(70.2–80.3)      |
| Liberia               | 40 to 64      | 16.5<br>(13.0–19.3)      | 6.61<br>(5.01–8.33)         | 23.2<br>(18.5–27.2)      |
| Liberia               | 65 plus       | 1.58<br>(0.876–2.14)     | 0.479<br>(0.234–0.755)      | 2.05<br>(1.15–2.81)      |
| Liberia               | 15 to 95 plus | 70.7<br>(65.1–76.3)      | 29.3<br>(23.7–34.9)         | 100<br>(100–100)         |
| Mali                  | 15 to 39      | 52.3<br>(44.9–61.0)      | 17.7<br>(12.3–24.2)         | 70.0<br>(64.5–76.4)      |
| Mali                  | 40 to 64      | 19.0<br>(15.3–22.7)      | 6.04<br>(4.19–8.35)         | 25.1<br>(20.1–29.7)      |
| Mali                  | 65 plus       | 3.93<br>(2.45–5.35)      | 0.965<br>(0.445–1.52)       | 4.89<br>(2.95–6.57)      |
| Mali                  | 15 to 95 plus | 75.3<br>(68.7–81.6)      | 24.7<br>(18.4–31.3)         | 100<br>(100–100)         |
| Mauritania            | 15 to 39      | 83.9<br>(0–100)          | 8.97<br>(0–41.1)            | 92.9<br>(0–100)          |
| Mauritania            | 40 to 64      | 0.255<br>(0–5.47)        | 0.0706<br>(0–0.00494)       | 0.326<br>(0–5.84)        |
| Mauritania            | 65 plus       | 0<br>(0–0)               | 0<br>(0–0)                  | 0<br>(0–0)               |
| Mauritania            | 15 to 95 plus | 84.2<br>(0–100)          | 9.04<br>(0–41.8)            | 93.2<br>(0–100)          |
| Niger                 | 15 to 39      | 75.7<br>(52.9–94.6)      | 16.2<br>(2.84–33.2)         | 92.0<br>(81.8–98.9)      |
| Niger                 | 40 to 64      | 5.81<br>(0.697–13.2)     | 1.97<br>(0.287–4.98)        | 7.78<br>(1.06–17.6)      |
| Niger                 | 65 plus       | 0.214<br>(0.00432–0.724) | 0.0453<br>(0.0000884–0.196) | 0.260<br>(0.00492–0.898) |
| Niger                 | 15 to 95 plus | 81.8<br>(63.7–96.6)      | 18.2<br>(3.41–36.3)         | 100<br>(100–100)         |
| Nigeria               | 15 to 39      | 47.8<br>(42.9–53.4)      | 18.2<br>(14.0–22.6)         | 66.0<br>(62.1–70.0)      |
| Nigeria               | 40 to 64      | 20.5<br>(18.0–23.0)      | 9.06<br>(7.02–11.3)         | 29.5<br>(26.1–32.9)      |
| Nigeria               | 65 plus       | 3.17<br>(2.44–3.85)      | 1.29<br>(0.809–1.84)        | 4.46<br>(3.35–5.48)      |
| Nigeria               | 15 to 95 plus | 71.5<br>(66.6–76.4)      | 28.5<br>(23.6–33.4)         | 100<br>(100–100)         |
| Sao Tome and Principe | 15 to 39      | 50.4<br>(44.0–58.5)      | 16.6<br>(11.3–22.5)         | 67.0<br>(62.3–72.4)      |
| Sao Tome and Principe | 40 to 64      | 22.3<br>(19.5–25.5)      | 7.05<br>(4.82–9.30)         | 29.4<br>(25.1–33.3)      |
| Sao Tome and Principe | 65 plus       | 2.78<br>(1.89–3.49)      | 0.808<br>(0.313–1.34)       | 3.58<br>(2.23–4.60)      |
| Sao Tome and Principe | 15 to 95 plus | 75.5<br>(69.1–81.8)      | 24.5<br>(18.2–30.9)         | 100<br>(100–100)         |
| Senegal               | 15 to 39      | 73.1<br>(52.8–92.2)      | 15.2<br>(3.77–28.6)         | 88.3<br>(77.5–97.2)      |
| Senegal               | 40 to 64      | 8.55<br>(1.90–15.9)      | 2.62<br>(0.486–5.68)        | 11.2<br>(2.80–21.4)      |
| Senegal               | 65 plus       | 0.462<br>(0.0227–1.23)   | 0.0909<br>(0.000792–0.351)  | 0.553<br>(0.0238–1.58)   |
| Senegal               | 15 to 95 plus | 82.1<br>(66.8–95.3)      | 17.9<br>(4.68–33.2)         | 100<br>(100–100)         |
| Sierra Leone          | 15 to 39      | 52.8<br>(47.1–59.3)      | 14.0<br>(10.1–18.7)         | 66.7<br>(62.6–71.5)      |

|              |               |                      |                        |                      |
|--------------|---------------|----------------------|------------------------|----------------------|
| Sierra Leone | 40 to 64      | 23·3<br>(20·2–26·4)  | 6·30<br>(4·64–8·22)    | 29·6<br>(25·6–33·3)  |
| Sierra Leone | 65 plus       | 3·02<br>(2·19–3·84)  | 0·659<br>(0·342–1·03)  | 3·68<br>(2·61–4·70)  |
| Sierra Leone | 15 to 95 plus | 79·1<br>(73·9–83·6)  | 20·9<br>(16·4–26·1)    | 100<br>(100–100)     |
| Togo         | 15 to 39      | 48·9<br>(38·8–61·2)  | 26·2<br>(17·3–34·9)    | 75·0<br>(69·2–82·1)  |
| Togo         | 40 to 64      | 15·3<br>(11·4–18·5)  | 8·05<br>(5·22–10·9)    | 23·3<br>(16·9–28·7)  |
| Togo         | 65 plus       | 1·12<br>(0·555–1·67) | 0·527<br>(0·164–0·946) | 1·65<br>(0·740–2·52) |
| Togo         | 15 to 95 plus | 65·2<br>(55·9–75·1)  | 34·8<br>(24·9–44·1)    | 100<br>(100–100)     |
